# Supplementary material
Source: MDPI journal article supplement (https://www.mdpi.com/search?q=agronomy-15-00911)
Supplement: s001 [file agronomy-15-00911-s001.zip]

## **Supplementary S1 Meta-analysis search terms**

Subject terms: drought stress, re-hydration, yield

Free terms: “drought stresses” OR “draught stress” OR “Drought resistant” OR “water stress” OR “moisture stress” OR “water-stress”, “rehydration” OR “re-hydrating” OR “rehydrate”, “Output” OR “Production” OR “yield” OR “Yields” OR “production output” OR “production capacity” OR “volume of production” OR “productive capacity” OR “production volume” OR “quantity of production”

## Supplementary S2 Search formulas for different databases

### 1. Web of Science:

((TS= ("drought stress" OR "drought stresses" OR "draught stress" OR "Drought resistant" OR "water stress" OR "moisture stress" OR "water-stress")) AND TS= ("re-hydration" OR "rehydration" OR "re-hydrating" OR "rehydrate")) AND TS= ("Output" OR "Production" OR "yield" OR "Yields" OR "production output" OR "production capacity" OR "volume of production" OR "productive capacity" OR "production volume" OR "quantity of production"))

### 2. PubMed:

("drought stress" [Title/Abstract] OR "drought stresses" [Title/Abstract] OR "draught stress" [Title/Abstract] OR "Drought resistant" [Title/Abstract] OR "water-stress"[Title/Abstract] OR "moisture stress" [Title/Abstract] OR "water-stress" [Title/Abstract]) AND ("re-hydration" [Title/Abstract] OR "rehydration" [Title/Abstract] OR "re-hydrating" [Title/Abstract] OR "rehydrate" [Title/Abstract]) AND ("Output" [Title/Abstract] OR "Production" [Title/Abstract] OR "yield" [Title/Abstract] OR "Yields" [Title/Abstract] OR "production output" [Title/Abstract] OR "production capacity" [Title/Abstract] OR "productive capacity" [Title/Abstract] OR "production volume"[Title/Abstract]))

### 3. ScienceDirect:

("drought stress" OR "draught stress" OR "drought" OR "water stress" OR "moisture stress") AND ("rehydration" OR "re-hydrating" OR "rehydrate") AND "yield")

### 4. CNKI

("drought stress" + "water stress" + "drought" + "drought resistant" \* "rehydration" + "re-hydrating" + "rehydrate" \* "yield")

### 5. Wanfang Database

(Title/keywords: ("drought stress" OR "water stress" OR "drought" OR "drought resistant") and Title/keywords: ("rehydration" OR "re-hydrating" OR "rehydrate") and Title/keywords: ("yield"))

### 6. China Science and Technology Journal Database

(((((Title/keywords = "drought stress" OR Title/keywords = "water stress") OR Title/keywords = "drought") OR Title/keywords = "drought resistant") AND ((Title/keywords = "rehydration" OR Title/keywords = "re-hydrating") OR Title/keywords = "rehydrate")) AND Title/keywords = "yield"))

## Supplementary S3 List of papers used for Meta-analysis data extraction

1. Yan, Yongluan, Weiping Hao, Xurong Mei, Qingjun Bai, and Lin Liu. "Effects of Water Stress Rewatering at Jointing Stage on Dry Matter Accumulation and Wue of Winter Wheat." *Chinese Journal of Agrometeorology* 32, no. 2 (2011): 190-95+202.
2. He, Jiaqi, Wei Hu, Honghai Zhu, Yuxia Li, Jie Zou, Wajid Ali Khattak, and Zhiguo Zhou. "Changes in Cotton Water Use Efficiency and Its Mechanism During Drought and Subsequent Rehydration." *Environmental and Experimental Botany* 209 (2023): 105285.
3. Liu, Sujun, Meilian Meng, Youjun Chen, and Ruizao Jiao. "Changes of Photosynthetic Characteristics and Response Mechanism of Potato Leaves under Water Stress." *Journal of Northwest A & F University(Natural Science Edition)* 46, no. 8 (2018): 29-38.
4. Zheng, Guiping, Dawei Yin, Lihua Liu, Xiuzhi Wang, and Bolun Wang. "Compensation and Significance of Water Stress on Growth of Rice." *Acta Agriculturae Boreali-Sinica* 24, no. 6 (2009): 93-99.
5. Liu, Yijian, Jianhong Ren, Lina Yin, Xiping Deng, Qingbo Ke, and Shiwen Wang. "Compensation Effect of Re-Watering after Different Drought Stresses on Source-Sink Metabolism During Tuber Expansion Period of Potato." *Chinese Journal of Applied Ecology* 30, no. 11 (2019): 3777-86.
6. Jiang, Mengyuan, Xiaoping Xue, Zaiqiang Yang, Hong Zhao, Zhiqiang Dong, Yi Xu, and Junli Zou. "Compensation Effects of Rewatering at Flowering Stage on Leaf State and Yield Structure of Winter Wheat under Drought." *Chinese Journal of Agrometeorology* 41, no. 4 (2020): 253-62.
7. Wei, Zhen, Shizhang Peng, Weili Kong, and Huanzhi Gao. "Compensation Effects of Roots and Shoots of Rice and Water Andfertilizer Utilization Efficiency Owing to Rewatering of Water Deficit Duringintermediate Period of Bearing." *Journal of Hohai University (Natural Sciences)* 38, no. 3 (2010): 322-26.
8. Cai, Kunzheng, Xuezhu Wu, and Shiming Luo. "Compensatory Effects of Re-Watering after Soil Drying on Rice Growth and Development." *Journal of Irrigation and Drainage*, no. 5 (2008): 34-36.
9. Liu, Gengshan, Anhong Guo, Sanxue Ren, Shunqing An, and Huarong Zhao. "Compensatory Effects of Re-Watering on Summer Maize Threatened by Water Stress at Seedling Period." *Chinese Journal of Ecology* 23, no. 3 (2004): 24-29.
10. Long, Mengqian, Jie Feng, Zhendong Li, Kaifeng Huang, Junhao Zhu, and Peiyun He. "Different Water Treatments Affect Growth and Yield of Watercress." *China Cucurbits and Vegetables* 35, no. 5 (2022): 81-84.
11. Liu, Ling, Weiping Hao, Qingjun Bai, Xurong Mei, and Yongliu Yan. "Differential Compensatory Effects of Winter Wheat in Water Stress and Re-Watering During Jointing Stage in North China." *Journal of Irrigation and Drainage* 30, no. 2 (2011): 37-40.
12. Chen, Qian, Liwen Ren, Wenkui Ding, Heling Wang, Hua Yang, and Xingyu Li. "Drought Stress Affects Height, Ear Characteristics and Yield of Maize at Different Growth Stages." *Chinese Agricultural Science Bulletin* 36, no. 9 (2020): 19-23.
13. Zhang, Jiyang, Zugui Liu, Aiwang Duan, and Zhangjiang Meng. "Ecophysiological Responses of Cotton to Water Stress and Recovery." *Cotton Science*, no. 6 (2006): 398-99.
14. Xia, Guimin, Qianqing Wang, Junxiao Zhang, Qi Wu, Daocai Chi, and Gengyuan Zhang. "Effect of Continuous Regulated Deficit Irrigation in Growth Period on Photosynthetic Characteristics and Root and Crown Growth of Peanut." *Transactions of the Chinese Society for Agricultural Machinery* 52, no. 8 (2021): 318-28.
15. Yuan, Yonghui, and Xiping Deng. "Effect of Deficit and Rewatering on Wheat Photosynthesis and Yield." *Acta Botanica Boreali-Occidentalia Sinica* 24, no. 7 (2004): 1250-54.
16. Zhang, Hengyue, Yi Li Guo, Lei Wang, Wei Wei, and Shengyan Ding. "Effect of Drought and Re-Watering on Leaf Photosynthetic Physiology Characteristics and Yield of Soybean." *Journal of Henan University (Natural Science)* 39, no. 2 (2009): 183-88.
17. Jiang, Xuehai, Ganghua Li, Shaohua Wang, Deqiang Luo, Weijia Zhou, Zhenghui Liu, Min Li, and Yanfeng Ding. "Effect of Drought Stress at Different Growth Stages on Grain Yield of

- Indica Hybrid Rice." *Journal of Nanjing Agricultural University* 38, no. 2 (2015): 173-81.
18. Li, Shaokun, Lu Xiao, Wenhua Huang, Wenping Zuo, Tianru Chen, Wangfeng Zhang, and Zhaoyang Wang. "Effect of Drought Stress on Cotton Growth and Lint Yield at Different Growing Stage." *Journal of Shihezi University (Natural Science)*, no. 4 (1999): 259-64.
  19. Chen, Xiaoyuan, and Yuanpei Luo. "Effect of Fluctuated Soil Water Condition on Dry Matter Allocation and Grain Yield in Winter Wheat." *Journal of China Agricultural University*, no. 1 (2001): 96-103.
  20. Li, Xuan, Henjia Zhang, Fuqiang Li, Yayun Wang, and Yuanyuan Shi. "Effect of Oasis Sub-Film Drip Irrigation on Dynamic Growth, Yield and Water Use Efficiency of Chili Peppers." *China Water Transport* 17, no. 12 (2017): 194-96.
  21. Zhang, Lei, Shengtao Xu, Junzhen Mi, Jianming Bai, and Jinghui Liu. "Effect of Plant Growth Nutrient Solution on Potato Osmoregulation Substances Accumulation under Drought Stress and Rewatering." *Journal of Irrigation and Drainage* 34, no. 10 (2015): 88-91+101.
  22. Lou, Ruitao, Daoxi Li, Yanbin Li, Zepeng Bian, and Yanan Zhu. "Effect of Pre-Anthesis Drought Hardening on Post-Anthesis Physiological Characteristics, Yield and Wue in Winter Wheat." *Phyton-International Journal of Experimental Botany* 90, no. 1 (2021): 245-57.
  23. Yue, Wenjun, and Fucang Zhang. "Effect of Rewatering after Water Stress on Growth and Yield of Winter Wheat." In *Proceedings of the 2011 Annual Conference of the Chinese Society of Agricultural Engineering*, 1-8. Chongqing, 2011.
  24. Li, Baifeng, Hao Feng, and Pute Wu. "Effect of Seedling Drought Stress and Rehydration on Morphological Development and Yield of Tomato." *Journal of Irrigation and Drainage* 27, no. 2 (2008): 63-65.
  25. Wang, Lei, Tong Zhang, and Shengyan Ding. "Effect of Short-Term Drought and Rewatering During the Blooming Stage on Soybean Photosynthesis and Yield." *Chinese Bulletin of Botany* 44, no. 2 (2009): 185-90.
  26. Zhang, Cuicui, Xiping Deng, and Wei Chen. "Effect of Sucrose Accumulation and Yield Components on Winter Wheat Flag Leaf under Drought or Re-Water During Filing Stage." *Journal of Northwest A & F University (Natural Science Edition)*, no. 6 (2011).
  27. Yang, Lili, Jianhong Ren, Yijian Liu, Lina Yin, Xiping Deng, and Shiwen Wang. "Effect of Water Deficit and Rehydration on the Post-Floweringassimilate Transport and Grain Filling in Wheat." *Acta Botanica Boreali-Occidentalia Sinica* 40, no. 11 (2020): 1909-18.
  28. Han, Kanhong, Jizong Zhang, Weijing Wang, Yaxing Hao, Lifeng Zhang, and Yuhua Liu. "Effect of Water Sress and Rewatering on Growth and Quality of Sugar Beet in Cold and Arid Region of North China." *Journal of Irrigation and Drainage* 34, no. 4 (2015): 61-66.
  29. Li, Yanbing, Yanan Zhu, Daoxi Li, and Yang Gao. "Effects of Alternating Drought and Watering on Growth, Photosynthesis and Yield of Wither Wheat." *Journal of Irrigation and Drainage* 37, no. 8 (2018): 76-82.
  30. Li, Yanbin, Zepeng Bian, Daoxi Li, Ruitao Lou, and Yanan Zhu. "Effects of Anthesis Drought and Rehydration on Photosynthetic Characteristics, Yield and Water Use Efficiency of Winter Wheat." *China Rural Water and Hydropower*, no. 6 (2020): 130-34+38.
  31. Wang, Dongbo, Shuji Wang, and Yuxin Han. "Effects of Different Regulated Deficit Irrigation Modes on Growth, Physiology and Yield of Winter Wheat." *Water Saving Irrigation*, no. 8 (2021): 8-12+18.
  32. Zhou, Xu, Xiaolei He, Liang Cao, Duo Li, Chenye Fu, Mingcong Zhang, Yuxian Zhang, and Mengxue Wang. "Effects of Different Water Stress and Rehydration at Seedling Stage on Antioxidant Properties and Yield of Soybean." *Crops*, no. 6 (2023): 135-42.
  33. Zhou, Xu, Yuxian Zhang, Duo Li, Chenye Fu, and Mengxue Wang. "Effects of Different Water Stress and Rehydration on Photosynthetic Physiology and Yield of Soybean at Seedling Stage." *Journal of Heilongjiang Bayi Agricultural University* 35, no. 5 (2023): 1-10.
  34. Meng, Zuqing, Fenping Song, and Cizhuoga Da. "Effects of Drought and Rehydration at Flowering Stage on Different Types of Rapeseed Growth and Yield under Tibet Plateau Environment." *Southwest China Journal of Agricultural Sciences* 24, no. 5 (2011): 1690-94.
  35. Zhnag, Jiao, Qi Wu, Yufei Zhou, Yitao Wang, and Ruidong Zhang. "Effects of Drought and Rewatering at Seedling and Filling Stages on Photosynthetic Characteristics and Dry Matter Production of Sorghum." *Crops*, no. 3 (2018): 148-54.
  36. Chen, Liang, Benfu Wang, Yuanyuan Jiang, Cougui Cao, and Ping Li. "Effects of Drought

- and Re-Watering on Rice Physiological and Biochemical Indexes of Leaves and Grain Yield at Booting Stage." *China Rice* 22, no. 1 (2016): 59-64.
37. Wang, Liwei, Yue Tan, Juncheng Zhang, Yumeng Kan, Lanzhong Guan, Tianning Wang, Yue Sun, and Limin Liu. "Effects of Drought Stress and Post-Drought Rewatering on Potato During Flowering and Tuber Expansion Periods." *Chinese Journal of Agrometeorology* 44, no. 1 (2023): 13-24.
  38. Wang, Xiaoxue, Yue Li, Bin Zhang, Juqing Jia, Meiche Feng, Meijun Zhang, and Wude Yang. "Effects of Drought Stress and Rehydration on Root Growth and Physiological characteristics of Oats." *Acta Agrestia Sinica* 28, no. 6 (2020): 1588-96.
  39. Guo, Zifeng, Daozhi Gong, Xurong Mei, Weiping Hao, Yuqin Li, and Binhui Liu. "Effects of Drought Stress and Re-Watering on Canopy Architecture and Water Use Efficiency of Two Maize Genotypes." *Journal of Irrigation and Drainage* 30, no. 2 (2011): 41-45.
  40. He, Jingdan, Renlai Wen, Shuyun Tian, Yuegui Su, Xueyin He, Yincheng Su, Weidong Cheng, Kaijian Huang, and Shukuan Zhang. "Effects of Drought Stress and Re-Watering on Growth and Yield of Various Maize Varieties at Tasseling Stage." *Journal of Southern Agriculture* 48, no. 3 (2017): 408-15.
  41. Xu, Yinping, Yongdong Pan, Cheng Ren, Yuanhu Yao, Yanchun Jia, Wenqing Chen, Kecang Huo, Qijun Bao, Feng Zhao, and Huayu Zhang. "Effects of Drought Stress and Rewatering on Yield and Quality and Chlorophyll Content of Barley." *Gansu Agricultural Science and Technology*, no. 6 (2019).
  42. ZHANG, Wei, and Lizhuo GUO. "Effects of Drought Stress at Different Periods on Dry Weight and Yield of Pea." *Journal of Gansu Agricultural University* 50, no. 1 (2015): 48-52.
  43. Zhnag, Junjie, Jinping Chen, Yulou Tang, Rui Zhang, Hongzhang Cao, Lijuan Wang, Mengjin Ma, Hao Wang, Yongchao Wang, Jiameng Guo, Krishna Sv Jagadish, Qinghua Yang, and Ruixin Shao. "Effects of Drought Stress before and after Anthesis on Photosynthetic Characteristics and Yield of Summer Maize after Re-Watering." *Acta Agronomica Sinica* 49, no. 5 (2023): 1397-409.
  44. Zhang, Lixia, Xiayan Guo, Pengfei Shi, Liangpeng Nie, Jingwei Ling, Peilin Shen, Li Ding, Li Zhang, Yuhu Lv, and Ziliang Pai. "Effects of Drought Stress on Growth, Yield and Benefits of Kenaf in Vigorous Growing Period." *Crops*, no. 01 (2023): 184-89.
  45. Zhang, Jibo, Xiaoping Xue, Xinguang Zhang, Cui Qiu, Fangyi Tan, and Nan Li. "Effects of Drought Stress on Mineral Element Accumulation, Yield and Grain Quality of Winter Wheat During Water Critical Period." *Journal of Arid Meteorology* 41, no. 2 (2023): 223-32.
  46. Zhao, Changxing, Xi Cheng, Yuefu Wang, and Minglun Wang. "Effects of Drought Stress on Peanut Growth During Different Growth Stages and Compensatory Effect after Water Recovery." *Chinese journal of oil crop sciences* 34, no. 6 (2012): 627-32.
  47. Liu, Jiang, Lijie Zhu, Kai Zhang, Xiaoming Wang, Liwei Wang, and Xining Gao. "Effects of Drought Stress/Rewatering on Photosynthetic Characteristics and Yield of Soybean at Different Growth Stages." *Ecology and Environmental Sciences* 31, no. 2 (2022): 286-96.
  48. Li, Jiajia, Ke Kong, Shuji Wang, and Guibin Pang. "Effects of Drought-Rewatering on Photosynthetic Chlorophyll Fluorescence and Water Use Efficiency of Tomatoes." *China Rural Water and Hydropower*, no. 8 (2021): 145-50.
  49. Liu, Liping, Zhu Ouyang, Lanfang Wu, Fadong Li, and Pengfei Liu. "Effects of Phased Drought and Re-Watering on the Photosynthetic Characteristics and Grain Yield of Winter Wheat." *Chinese Journal of Ecology* 31, no. 11 (2012): 2797-803.
  50. Chen, Xiaorong, Lingyan Liu, Chonghu Yan, Lei Zhong, Changlan Zhu, Xiaosong Peng, Xiaopeng He, Junru Fu, Linjuan Ouyang, and Haohua He. "Effects of Rewatering after Drought at Heading Date on Seed Setting and Some Physiological Indexes in Early Rice Varieties with Different Yields." *Chinese Journal of Rice Science* 27, no. 1 (2013): 77-83.
  51. Luo, Honghai, Yali Zhang, Wangfeng Zhang, Huidong Bai, Zaiju He, Mingwei Du, and Hongzhi Zhang. "Effects of Rewatering after Drought Stress on Photosynthesis and Yield During Flowering and Boll-Setting Stage of Cotton under-Mulch-Drip Irrigation in Xinjiang." *Acta Agronomica Sinica*, no. 1 (2008): 171-74.
  52. Yan, Tao, Guoliang Zhu, Feifan Ge, Yuelin Jiang, Wei Li, and Wenge Wu. "Effects of Staged Drought Stress on Photosynthetic Physiological characteristics and Yield Structure of Wheat." *Meteorology and Disaster Reduction Research* 42, no. 1 (2019): 46-53.
  53. Lv, Xiao, Xinhua Zhan, Jianghong Yang, Hang Wu, Binbin Zhang, Lu Yang, Hui Zhang,

- Quan Gao, and Lili Gao. "Effects of Water Stress and Rehydration on Spring Corn Yield at Different Fertility Stages." *Anhui Agricultural Science Bulletin* 25, no. 13 (2019): 53+56.
54. Wu, Longmei, Dewei Chen, Liwei Lu, Min Huang, Yu Zhang, Shihong Xu, Guorong Tang, Lümia Tian, and Ligeng Jiang. "Effects of Water Stress and Re-Watering at Booting and Grain Filling Stages on Physiology and Yield of Guiliangyou 2." *Journal of Southern Agriculture* 45, no. 6 (2014).
  55. Wang, Shijie, Hengjia Zhang, Xiaoting Yang, Yucai Wang, and Daoxin Xue. "The Effects of Water Stress and Rewatering on Dynamic Growth, Yield and Water Use of Pepper with Mulched Drip Irrigation in Oasis Region." *Acta Agriculturae Boreali-Sinica* 32, no. 4 (2017): 215-24.
  56. Wang, Zejie, Yongjun Chen, and Chonghua Xie. "Effects of Water Stress and Rewatering on Physiological Characters of Rice B You 827 at Flowering Stage." *Journal of Henan Agricultural Sciences*, no. 9 (2008): 34-38.
  57. Hu, Mengmeng, Jizong Zhang, Lifeng Zhang, Yuhua Liu, and Pengjian Huang. "Effects of Water Stress and Rewatering on Potato Growth and Yield." *Agricultural Research in the Arid Areas* 39, no. 2 (2021): 95-101+21.
  58. Li, Mingda, and Hongping Zhang. "Effects of Water Stress and Rewatering on the Dry Matter Accumulation, Root Shoot Ratio and Yield of Pea." *Journal of Desert Research* 36, no. 4 (2016): 1034-40.
  59. Yan, Yongliu, Weiping Hao, Qingjun Bai, Xurong Mei, and Ling Liu. "Effects of Water Stress at Jointing Stage and Fillingstage on Wue of Winter Wheat in North China." *Journal of Irrigation and Drainage* 31, no. 1 (2012): 46-49.
  60. Guo, Hui, Jun Ma, Shuxing Li, Min Li, Ping Zhu, and Yu Chen. "Effects of Water Stress on Partial Physiological Characteristics and Yield Compensation in Rice at Booting Stage." *Journal of Southern Agriculture* 44, no. 9 (2013): 1448-54.
  61. Guo, Yangbo, Hao Feng, and Pute Wu. "Effects of Water Stress on Physiological Characteristic and Water Production Efficiency of Tomato." *Jouranl of Irrigation and Drainage*, no. 3 (2008): 52-55.
  62. Chen, Xiaoyuan, Zhihong Gao, Xiaoying Liu, and Yuanpei Luo. "Effects of Water Stress on Root/Shoot Relation and Grain Yield in Winter Wheat." *Acta Agronomica Sinica*, no. 7 (2004): 723-28.
  63. Luo, Aihua, Xianshi Guo, and Shouxi Chai. "Effects of Water Stress on Water Use Efficiency and Photosynthetic Diurnal Changes of Different Spring Wheat." *Journal of Gansu Agricultural University* 43, no. 4 (2008): 68-73.
  64. Ren, Chuanyou, Zhuoqun Jiang, Xiaoxuan Su, Qianchuan Mi, Jiang Wang, Yue Li, and Xining Gao. "Effects of Water Stress/Rewatering on Leaf Photosynthetic characteristics and Grain Yield of Foxtail Millet." *Chinese Journal of Applied Ecology* 32, no. 4 (2021): 456-67.
  65. Guo, Jiameng, Ye Ma, Jun Mao, Boyuan Zheng, Wuling Ran, Xinpei Han, Dongliang Li, Qinghua Yang, and Ruixin Shao. "Effects on Lodging Resistance of Summer Maize by Regulated Deficit Irrigation at Seedling Stage." *Journal of Maize Sciences* 26, no. 1 (2018): 83-88.
  66. Liu, Jili, Changxing Zhao, Na Wu, Yuefu Wang, and Minglun Wang. "Effects on Lodging Resistance of Summer Maize by Regulated Deficit Irrigation at Seedling Stage." *Scientia Agricultura Sinica* 44, no. 3 (2011): 469-76.
  67. Huo, Zhiguo, Shikui Li, Yueming Bai, Min Wen, Suyan Wang, and Yanlong Hu. "The Experimental Research on Slight and Moderate Waterstress Effects on Increasing Yield and Saving Watermechanism of Winter Wheat." *Journal of Natural Resources*, no. 1 (2003): 58-66.
  68. Cao, Changlin, Wenbin Bai, Jianhua Zhang, Lijuan Shi, Zhidong Peng, Na Fan, Guang Li, Ruifeng Guo, and Baiyuang Jiang. "Expression of Sorghum Production Traits and Re-Watering Compensation Effect under Water Stress." *Chinese Agricultural Science Bulletin* 32, no. 33 (2016): 81-88.
  69. Ji, Ruipeng, Yusheng Che, Yongning Zhu, Tao Iang, Rui Feng, Wenying Yu, and Yushu Zhang. "Impacts of Drought Stress on the Growth and Development and Grain Yield of Spring Maize in Northeast China." *Chinese Journal of Applied Ecology* 23, no. 11 (2012): 3021-26.
  70. Jiang, Peng, Meiou Qin, Fu Cai, Rihong Wen, Ying Weng, Feiyun Yang, Pei Sun, Ailin Feng,

- and Yuan Fang. "Impacts of Drought-Rewetting on Spring Maize's Physiological Parameters and Yield in the Northeast China." *Journal of Arid Meteorology* 41, no. 2 (2023): 207-14.
71. Gu, Yanfang, Shenyan Ding, Zhiyin Gao, and Qian Xing. "Influence of Drought and Rewatering on the Pattern of Photosynthate Partitioning of Winter Wheat." *Strategic Study of CAE* 14, no. 3 (2012): 59-64.
  72. Li, Lili, Zhiyuan Hou, Haibo Lu, and Xuechen Gong. "Influence of Drought Stress and Rewatering on the Photosynthetic characteristics and Yield of 'Zhangzagu 3'." *Journal of Hebei Agricultural University* 40, no. 4 (2017): 19-24.
  73. Chen, Xiaoyuan, and Yuanpei Luo. "The Influence of Fluctuated Soil Moisture on Growth Dynamic of Winter Wheat." *Scientia Agricultura Sinica* 34, no. 4 (2001): 403-09.
  74. Chen, Xiaoyuan, Yuanpei Luo, and Zihong Gao. "The Morphologic Response of Winter Wheat Exposed to Water Stress to Rewatering during the Jointing Stage." *Journal of Inner Mongolia Agricultural University* 21, no. 3 (2000): 1-6.
  75. Ni, Shengli, Xingmao Li, Yacui Wang, and Genshen Ren. "Physiological Development and Water Use Efficiency of Winter Wheat after Re-Watering Following Drought Stresses at Different Growth Stages." *Journal of Irrigation and Drainage* 37, no. 11 (2018): 20-25.
  76. Cui, Jiaxin, Huifeng Ning, Ni Song, Yingyin Zhang, Xiaofei Liu, and Xiaojun Shen. "Physiological Development and Yield of Winter Wheat after Rehydration Following Water Stress at Heading and Flowering Stage." *Journal of Irrigation and Drainage* 38, no. 1 (2019): 8-13+55.
  77. Mu, Qing, Huanjie Cai, Shikun Sun, Shanshan Wen, Jiatun Xu, Mengqi Dong, and Qaisar Saddique. "The Physiological Response of Winter Wheat under Short-Term Drought Conditions and the Sensitivity of Different Indices to Soil Water Changes." *Agricultural Water Management* 243 (2021).
  78. Liu, Sujun, Lili Meng, Meiliang Meng, and Youjun Chen. "Physiological Responses of Potato under Water Stress and Rehydration in Tuber Formation Period." *Journal of Irrigation and Drainage* 34, no. 10 (2015): 45-51.
  79. Li, Yangyang, Hua Fan, Jixia Su, Cong Fei, Kaiyong Wang, Xiaoming Tian, and Fuyu Ma. "Regulated Deficit Irrigation at Special Development Stages Increases Sugar Beet Yield." *Agronomy Journal* 111, no. 3 (2019): 1293-303.
  80. Li, Shuxing, Hui Guo, Min Li, Min Tu, Lili Wang, Jun Ma, and Mingtian Wang. "The Responding of Rice after Water Stress in Young Panicle Formation Stage." *Acta Agriculturae Boreali-Sinica* 29, no. S1 (2014): 206-12.
  81. Wang, Rongrong, Tianpeng Chen, Haojie Yin, and Guiying Jiang. "Response and Drip Irrigation Re-Watering Compensation Effect of Spring Wheat Roots to Drought Stress with Different Drought Tolerance Varieties." *Scientia Agricultura Sinica* 56, no. 24 (2023): 4826-41.
  82. Yin, Haojie, Rongrong Wang, Guiying Jiang, Ziqiang Che, Tianpeng Chen, Jiajie Hu, Rougu Guo, Tiantian Pang, and Qiqi Lei. "Response of Photosynthetic Physiology and Yield of Spring Wheat to Drought-Rewatering." *Journal of Soil and Water Conservation* 37, no. 6 (2023): 134-44.
  83. Wang, Rongrong, Bingying Xie, Haiqi Wang, Guiying Jian, Haojie Yin, and Ting Zhang. "Response of Root Morphology and Endogenous Hormones of Drip Irrigated Spring Wheat to Drought Stress and Rewatering at Anthesis Stage." *Journal of Triticeae Crops* 43, no. 9 (2023): 1174-86.
  84. Wang, Zhiqiang, Weiwei Liang, Wenwen Fan, and Tongbao Lin. "Studies on Compensation Effects of Rewatering on Winter Wheat Suffering from Droughts During Spring under Different Soil Fertility Conditions." *Scientia Agricultura Sinica* 44, no. 8 (2011): 1628-36.
  85. Niu, Jing, Lei Zhnag, Siping Zhang, Shaodong Liu, Huijuan Ma, and Xinhua Zhao. "Studies on Yield and Fiber Quality Changes in Cotton under Drought Stress after Re-Watering During the Flowering and Boll-Forming Stages." *Cotton Science* 28, no. 6 (2016): 584-93.
  86. Guo, Zifeng, Daozhi Gong, Weiping Hao, Xuyan Mei, Yuqin Li, and Binghui Liu. "Study on Compensation of Maize Varieties under Drought Stress and Re-Watering in Different Growth Stages." *Journal of Maize Sciences* 19, no. 4 (2011): 84-88.
  87. Li, Fengying, and Zhanbing Huang. "A Study on Compensatory Effect of Corn at Different Growth Stages to Water Deficit Change." *Chinese Journal of Eco-Agriculture* 9, no. 3 (2001): 65-67.

88. Cui, Yi, Juliang Jin, Shangming Jiang, Yuliang Zhou, Chenggou Wu, and Shaowei Ning. "Study on Response Relationship between Evapotranspiration and Aboveground Growth Matter of Soybean under Different Drought Stress." *Journal of Catastrophology* 36, no. 4 (2021): 79-87.
89. Chen, Xiaoyuan, and Yuanpei Luo. "Study on the Compensatory Effect of Rewatering During the Flowering Stage after Previous Water Stress in Winter Wheat." *Acta Agronomica Sinica* 27, no. 4 (2001): 512-16.
90. Yuan, Yonghui, Xiping Deng, and Liying Zhao. "Yield Effect of Different Wheat Genotypes under Varied Water Treatments." *Chinese Journal of Eco-Agriculture* 14, no. 1 (2006): 84-86.
