# Supplementary material
Source: MDPI journal article supplement (https://www.mdpi.com/search?q=agronomy-15-00911)
Supplement: s001 [file agronomy-15-00911-s001.zip]

## Sheet: S1
Table S1 Literature data used for meta-analysis
ID	Number	Authors	Year	Journals	Longitude	Latitude	Latin name	Plant classification	Family	Plant types	Periods of stress	Periods of stress	Targets	degree of stress	degree of stress	Duration of stress	Duration of stress	N-T	N-C	Mean-T	SD-T	Mean-C	SD-C
1	1	ZHANG Lei, XU Shengtao, MI Junzhen, BAI Jianming and LIU Jinghui	2015	Jouranl of Irrigation and Drainage	111.71	40.81	Solanum tuberosum L.	Dicotyledons	Solanaceae	Herbaceous	Tuber expansion stage	Later period	Proline	0.45	Heavy stress	14d	Short-term coercion	3	3	1265.71	466.441	967.235	275.978
1	2	ZHANG Lei, XU Shengtao, MI Junzhen, BAI Jianming and LIU Jinghui	2015	Jouranl of Irrigation and Drainage	111.71	40.81	Solanum tuberosum L.	Dicotyledons	Solanaceae	Herbaceous	Tuber expansion stage	Later period	Proline	0.6	Medium stress	14d	Short-term coercion	3	3	1153.5	365.379	967.235	275.978
1	3	ZHANG Lei, XU Shengtao, MI Junzhen, BAI Jianming and LIU Jinghui	2015	Jouranl of Irrigation and Drainage	111.71	40.81	Solanum tuberosum L.	Dicotyledons	Solanaceae	Herbaceous	Tuber expansion stage	Later period	Soluble sugar	0.45	Heavy stress	14d	Short-term coercion	3	3	1.35932	0.26343	0.570342	0.172876
1	4	ZHANG Lei, XU Shengtao, MI Junzhen, BAI Jianming and LIU Jinghui	2015	Jouranl of Irrigation and Drainage	111.71	40.81	Solanum tuberosum L.	Dicotyledons	Solanaceae	Herbaceous	Tuber expansion stage	Later period	Soluble sugar	0.6	Medium stress	14d	Short-term coercion	3	3	1.18821	0.271662	0.570342	0.172876
1	5	ZHANG Lei, XU Shengtao, MI Junzhen, BAI Jianming and LIU Jinghui	2015	Jouranl of Irrigation and Drainage	111.71	40.81	Solanum tuberosum L.	Dicotyledons	Solanaceae	Herbaceous	Tuber expansion stage	Later period	Soluble protein	0.45	Heavy stress	14d	Short-term coercion	3	3	18.8811	2.06917	17.8904	2.32151
1	6	ZHANG Lei, XU Shengtao, MI Junzhen, BAI Jianming and LIU Jinghui	2015	Jouranl of Irrigation and Drainage	111.71	40.81	Solanum tuberosum L.	Dicotyledons	Solanaceae	Herbaceous	Tuber expansion stage	Later period	Soluble protein	0.6	Medium stress	14d	Short-term coercion	3	3	18.5315	3.22993	17.8904	2.32151
1	7	ZHANG Lei, XU Shengtao, MI Junzhen, BAI Jianming and LIU Jinghui	2015	Jouranl of Irrigation and Drainage	111.71	40.81	Solanum tuberosum L.	Dicotyledons	Solanaceae	Herbaceous	Tuber expansion stage	Later period	Yield	0.6	Medium stress	14d	Short-term coercion	15	15	60.76	23.5322	74.56	28.877
1	8	ZHANG Lei, XU Shengtao, MI Junzhen, BAI Jianming and LIU Jinghui	2015	Jouranl of Irrigation and Drainage	111.71	40.81	Solanum tuberosum L.	Dicotyledons	Solanaceae	Herbaceous	Tuber expansion stage	Later period	Yield	0.6	Medium stress	14d	Short-term coercion	15	15	71.47	27.6802	74.56	28.877
2	9	LI Fengying and HUANG Zhanbing	2001	Chinese Journal of Eco-Agriculture	108.08	34.28	Zea mays L.	Monocotyledon	Graminae	Herbaceous	Seedling stage	Preceding period	Yield	0.5	Medium stress	14d	Short-term coercion	3	3	4755	823.59	6585	1140.56
2	10	LI Fengying and HUANG Zhanbing	2001	Chinese Journal of Eco-Agriculture	108.08	34.28	Zea mays L.	Monocotyledon	Graminae	Herbaceous	Jointing stage	Preceding period	Yield	0.5	Medium stress	14d	Short-term coercion	3	3	6150	1065.21	6585	1140.56
2	11	LI Fengying and HUANG Zhanbing	2001	Chinese Journal of Eco-Agriculture	108.08	34.28	Zea mays L.	Monocotyledon	Graminae	Herbaceous	Stamen extraction stage	Mid period	Yield	0.55	Medium stress	14d	Short-term coercion	3	3	5385	932.709	6585	1140.56
2	12	LI Fengying and HUANG Zhanbing	2001	Chinese Journal of Eco-Agriculture	108.08	34.28	Zea mays L.	Monocotyledon	Graminae	Herbaceous	Period of grouting	Mid period	Yield	0.5	Medium stress	14d	Short-term coercion	3	3	6285	1088.59	6585	1140.56
2	13	LI Fengying and HUANG Zhanbing	2001	Chinese Journal of Eco-Agriculture	108.08	34.28	Zea mays L.	Monocotyledon	Graminae	Herbaceous	Seedling stage	Preceding period	WUE	0.5	Medium stress	14d	Short-term coercion	3	3	26.85	4.65056	28.5	4.93634
2	14	LI Fengying and HUANG Zhanbing	2001	Chinese Journal of Eco-Agriculture	108.08	34.28	Zea mays L.	Monocotyledon	Graminae	Herbaceous	Jointing stage	Preceding period	WUE	0.5	Medium stress	14d	Short-term coercion	3	3	30	5.19615	28.5	4.93634
2	15	LI Fengying and HUANG Zhanbing	2001	Chinese Journal of Eco-Agriculture	108.08	34.28	Zea mays L.	Monocotyledon	Graminae	Herbaceous	Stamen extraction stage	Mid period	WUE	0.55	Medium stress	14d	Short-term coercion	3	3	23.7	4.10496	28.5	4.93634
2	16	LI Fengying and HUANG Zhanbing	2001	Chinese Journal of Eco-Agriculture	108.08	34.28	Zea mays L.	Monocotyledon	Graminae	Herbaceous	Period of grouting	Mid period	WUE	0.5	Medium stress	14d	Short-term coercion	3	3	30.3	5.24811	28.5	4.93634
3	17	GUO Hui, MA Jun, LI Shuxing, LI Min, ZHU Ping and CHEN Yu	2013	Journal of Southern Agriculture	103.87	30.71	Oryza sativa L.	Monocotyledon	Graminae	Herbaceous	Maturity period	Later period	SPAD	-25kPa	Medium stress	15d	Short-term coercion	3	3	29.9608	5.18937	29.1384	5.04692
3	18	GUO Hui, MA Jun, LI Shuxing, LI Min, ZHU Ping and CHEN Yu	2013	Journal of Southern Agriculture	103.87	30.71	Oryza sativa L.	Monocotyledon	Graminae	Herbaceous	Maturity period	Later period	SPAD	-50kPa	Heavy stress	15d	Short-term coercion	3	3	29.3734	5.08762	29.1384	5.04692
3	19	GUO Hui, MA Jun, LI Shuxing, LI Min, ZHU Ping and CHEN Yu	2013	Journal of Southern Agriculture	103.87	30.71	Oryza sativa L.	Monocotyledon	Graminae	Herbaceous	Maturity period	Later period	SPAD	-25kPa	Medium stress	15d	Short-term coercion	3	3	33.0079	5.71714	35.9763	6.23127
3	20	GUO Hui, MA Jun, LI Shuxing, LI Min, ZHU Ping and CHEN Yu	2013	Journal of Southern Agriculture	103.87	30.71	Oryza sativa L.	Monocotyledon	Graminae	Herbaceous	Maturity period	Later period	SPAD	-50kPa	Heavy stress	15d	Short-term coercion	3	3	31.4644	5.44979	35.9763	6.23127
3	21	GUO Hui, MA Jun, LI Shuxing, LI Min, ZHU Ping and CHEN Yu	2013	Journal of Southern Agriculture	103.87	30.71	Oryza sativa L.	Monocotyledon	Graminae	Herbaceous	Maturity period	Later period	SPAD	-25kPa	Medium stress	15d	Short-term coercion	3	3	29.3577	5.0849	26.4106	4.57445
3	22	GUO Hui, MA Jun, LI Shuxing, LI Min, ZHU Ping and CHEN Yu	2013	Journal of Southern Agriculture	103.87	30.71	Oryza sativa L.	Monocotyledon	Graminae	Herbaceous	Maturity period	Later period	SPAD	-50kPa	Heavy stress	15d	Short-term coercion	3	3	25.2771	4.37812	26.4106	4.57445
3	23	GUO Hui, MA Jun, LI Shuxing, LI Min, ZHU Ping and CHEN Yu	2013	Journal of Southern Agriculture	103.87	30.71	Oryza sativa L.	Monocotyledon	Graminae	Herbaceous	Maturity period	Later period	SPAD	-25kPa	Medium stress	15d	Short-term coercion	3	3	33.7786	5.85063	30.916	5.35481
3	24	GUO Hui, MA Jun, LI Shuxing, LI Min, ZHU Ping and CHEN Yu	2013	Journal of Southern Agriculture	103.87	30.71	Oryza sativa L.	Monocotyledon	Graminae	Herbaceous	Maturity period	Later period	SPAD	-50kPa	Heavy stress	15d	Short-term coercion	3	3	29.4275	5.09699	30.916	5.35481
3	25	GUO Hui, MA Jun, LI Shuxing, LI Min, ZHU Ping and CHEN Yu	2013	Journal of Southern Agriculture	103.87	30.71	Oryza sativa L.	Monocotyledon	Graminae	Herbaceous	Maturity period	Later period	SPAD	-25kPa	Medium stress	15d	Short-term coercion	3	3	26.7568	4.63441	27.6413	4.78761
3	26	GUO Hui, MA Jun, LI Shuxing, LI Min, ZHU Ping and CHEN Yu	2013	Journal of Southern Agriculture	103.87	30.71	Oryza sativa L.	Monocotyledon	Graminae	Herbaceous	Maturity period	Later period	SPAD	-25kPa	Medium stress	15d	Short-term coercion	3	3	28.4152	4.92166	27.6413	4.78761
3	27	GUO Hui, MA Jun, LI Shuxing, LI Min, ZHU Ping and CHEN Yu	2013	Journal of Southern Agriculture	103.87	30.71	Oryza sativa L.	Monocotyledon	Graminae	Herbaceous	Maturity period	Later period	Soluble sugar	-50kPa	Heavy stress	15d	Short-term coercion	3	3	6.79808	1.17746	5.78846	1.00259
3	28	GUO Hui, MA Jun, LI Shuxing, LI Min, ZHU Ping and CHEN Yu	2013	Journal of Southern Agriculture	103.87	30.71	Oryza sativa L.	Monocotyledon	Graminae	Herbaceous	Maturity period	Later period	Soluble sugar	-25kPa	Medium stress	15d	Short-term coercion	3	3	7.40385	1.28238	5.78846	1.00259
3	29	GUO Hui, MA Jun, LI Shuxing, LI Min, ZHU Ping and CHEN Yu	2013	Journal of Southern Agriculture	103.87	30.71	Oryza sativa L.	Monocotyledon	Graminae	Herbaceous	Maturity period	Later period	Soluble sugar	-50kPa	Heavy stress	15d	Short-term coercion	3	3	6.5495	1.13441	6.30693	1.09239
3	30	GUO Hui, MA Jun, LI Shuxing, LI Min, ZHU Ping and CHEN Yu	2013	Journal of Southern Agriculture	103.87	30.71	Oryza sativa L.	Monocotyledon	Graminae	Herbaceous	Maturity period	Later period	Soluble sugar	-25kPa	Medium stress	15d	Short-term coercion	3	3	7.72772	1.33848	6.30693	1.09239
3	31	GUO Hui, MA Jun, LI Shuxing, LI Min, ZHU Ping and CHEN Yu	2013	Journal of Southern Agriculture	103.87	30.71	Oryza sativa L.	Monocotyledon	Graminae	Herbaceous	Maturity period	Later period	Soluble sugar	-50kPa	Heavy stress	15d	Short-term coercion	3	3	7.58911	1.31447	5.92574	1.02637
3	32	GUO Hui, MA Jun, LI Shuxing, LI Min, ZHU Ping and CHEN Yu	2013	Journal of Southern Agriculture	103.87	30.71	Oryza sativa L.	Monocotyledon	Graminae	Herbaceous	Maturity period	Later period	Soluble sugar	-25kPa	Medium stress	15d	Short-term coercion	3	3	8.52475	1.47653	5.92574	1.02637
3	33	GUO Hui, MA Jun, LI Shuxing, LI Min, ZHU Ping and CHEN Yu	2013	Journal of Southern Agriculture	103.87	30.71	Oryza sativa L.	Monocotyledon	Graminae	Herbaceous	Maturity period	Later period	Soluble sugar	-50kPa	Heavy stress	15d	Short-term coercion	3	3	7.96	1.37871	9.32	1.61427
3	34	GUO Hui, MA Jun, LI Shuxing, LI Min, ZHU Ping and CHEN Yu	2013	Journal of Southern Agriculture	103.87	30.71	Oryza sativa L.	Monocotyledon	Graminae	Herbaceous	Maturity period	Later period	Soluble sugar	-25kPa	Medium stress	15d	Short-term coercion	3	3	7.68	1.33022	9.32	1.61427
3	35	GUO Hui, MA Jun, LI Shuxing, LI Min, ZHU Ping and CHEN Yu	2013	Journal of Southern Agriculture	103.87	30.71	Oryza sativa L.	Monocotyledon	Graminae	Herbaceous	Maturity period	Later period	Soluble sugar	-25kPa	Medium stress	15d	Short-term coercion	3	3	7.38786	1.27962	6.50132	1.12606
3	36	GUO Hui, MA Jun, LI Shuxing, LI Min, ZHU Ping and CHEN Yu	2013	Journal of Southern Agriculture	103.87	30.71	Oryza sativa L.	Monocotyledon	Graminae	Herbaceous	Maturity period	Later period	Soluble sugar	-50kPa	Heavy stress	15d	Short-term coercion	3	3	7.6095	1.318	6.50132	1.12606
3	37	GUO Hui, MA Jun, LI Shuxing, LI Min, ZHU Ping and CHEN Yu	2013	Journal of Southern Agriculture	103.87	30.71	Oryza sativa L.	Monocotyledon	Graminae	Herbaceous	Maturity period	Later period	Pn	-25kPa	Medium stress	15d	Short-term coercion	3	3	2.3753	0.411413	8.12352	1.40703
3	38	GUO Hui, MA Jun, LI Shuxing, LI Min, ZHU Ping and CHEN Yu	2013	Journal of Southern Agriculture	103.87	30.71	Oryza sativa L.	Monocotyledon	Graminae	Herbaceous	Maturity period	Later period	Pn	-50kPa	Heavy stress	15d	Short-term coercion	3	3	5.93824	1.02853	8.12352	1.40703
3	39	GUO Hui, MA Jun, LI Shuxing, LI Min, ZHU Ping and CHEN Yu	2013	Journal of Southern Agriculture	103.87	30.71	Oryza sativa L.	Monocotyledon	Graminae	Herbaceous	Maturity period	Later period	Pn	-25kPa	Medium stress	15d	Short-term coercion	3	3	5.75	0.995929	6.4	1.10851
3	40	GUO Hui, MA Jun, LI Shuxing, LI Min, ZHU Ping and CHEN Yu	2013	Journal of Southern Agriculture	103.87	30.71	Oryza sativa L.	Monocotyledon	Graminae	Herbaceous	Maturity period	Later period	Pn	-50kPa	Heavy stress	15d	Short-term coercion	3	3	6.1	1.05655	6.4	1.10851
3	41	GUO Hui, MA Jun, LI Shuxing, LI Min, ZHU Ping and CHEN Yu	2013	Journal of Southern Agriculture	103.87	30.71	Oryza sativa L.	Monocotyledon	Graminae	Herbaceous	Maturity period	Later period	Pn	-25kPa	Medium stress	15d	Short-term coercion	3	3	6.6	1.14315	4.93333	0.854478
3	42	GUO Hui, MA Jun, LI Shuxing, LI Min, ZHU Ping and CHEN Yu	2013	Journal of Southern Agriculture	103.87	30.71	Oryza sativa L.	Monocotyledon	Graminae	Herbaceous	Maturity period	Later period	Pn	-50kPa	Heavy stress	15d	Short-term coercion	3	3	7.06667	1.22398	4.93333	0.854478
3	43	GUO Hui, MA Jun, LI Shuxing, LI Min, ZHU Ping and CHEN Yu	2013	Journal of Southern Agriculture	103.87	30.71	Oryza sativa L.	Monocotyledon	Graminae	Herbaceous	Maturity period	Later period	Pn	-25kPa	Medium stress	15d	Short-term coercion	3	3	7.4359	1.28794	5.38462	0.932643
3	44	GUO Hui, MA Jun, LI Shuxing, LI Min, ZHU Ping and CHEN Yu	2013	Journal of Southern Agriculture	103.87	30.71	Oryza sativa L.	Monocotyledon	Graminae	Herbaceous	Maturity period	Later period	Pn	-50kPa	Heavy stress	15d	Short-term coercion	3	3	8.07692	1.39896	5.38462	0.932643
3	45	GUO Hui, MA Jun, LI Shuxing, LI Min, ZHU Ping and CHEN Yu	2013	Journal of Southern Agriculture	103.87	30.71	Oryza sativa L.	Monocotyledon	Graminae	Herbaceous	Maturity period	Later period	Pn	-25kPa	Medium stress	15d	Short-term coercion	3	3	8.4466	1.46299	5.82524	1.00896
3	46	GUO Hui, MA Jun, LI Shuxing, LI Min, ZHU Ping and CHEN Yu	2013	Journal of Southern Agriculture	103.87	30.71	Oryza sativa L.	Monocotyledon	Graminae	Herbaceous	Maturity period	Later period	Pn	-50kPa	Heavy stress	15d	Short-term coercion	3	3	4.85437	0.840801	5.82524	1.00896
3	47	GUO Hui, MA Jun, LI Shuxing, LI Min, ZHU Ping and CHEN Yu	2013	Journal of Southern Agriculture	103.87	30.71	Oryza sativa L.	Monocotyledon	Graminae	Herbaceous	Maturity period	Later period	Yield	-25kPa	Medium stress	15d	Short-term coercion	3	3	60.7	10.5135	64.21	11.1215
3	48	GUO Hui, MA Jun, LI Shuxing, LI Min, ZHU Ping and CHEN Yu	2013	Journal of Southern Agriculture	103.87	30.71	Oryza sativa L.	Monocotyledon	Graminae	Herbaceous	Maturity period	Later period	Yield	-50kPa	Heavy stress	15d	Short-term coercion	3	3	50.42	8.733	64.21	11.1215
3	49	GUO Hui, MA Jun, LI Shuxing, LI Min, ZHU Ping and CHEN Yu	2013	Journal of Southern Agriculture	103.87	30.71	Oryza sativa L.	Monocotyledon	Graminae	Herbaceous	Maturity period	Later period	Yield	-25kPa	Medium stress	15d	Short-term coercion	3	3	56.69	9.819	72.54	12.5643
3	50	GUO Hui, MA Jun, LI Shuxing, LI Min, ZHU Ping and CHEN Yu	2013	Journal of Southern Agriculture	103.87	30.71	Oryza sativa L.	Monocotyledon	Graminae	Herbaceous	Maturity period	Later period	Yield	-50kPa	Heavy stress	15d	Short-term coercion	3	3	57.36	9.93504	72.54	12.5643
3	51	GUO Hui, MA Jun, LI Shuxing, LI Min, ZHU Ping and CHEN Yu	2013	Journal of Southern Agriculture	103.87	30.71	Oryza sativa L.	Monocotyledon	Graminae	Herbaceous	Maturity period	Later period	Yield	-25kPa	Medium stress	15d	Short-term coercion	3	3	55.1	9.5436	62.3	10.7907
3	52	GUO Hui, MA Jun, LI Shuxing, LI Min, ZHU Ping and CHEN Yu	2013	Journal of Southern Agriculture	103.87	30.71	Oryza sativa L.	Monocotyledon	Graminae	Herbaceous	Maturity period	Later period	Yield	-50kPa	Heavy stress	15d	Short-term coercion	3	3	44.71	7.744	62.3	10.7907
3	53	GUO Hui, MA Jun, LI Shuxing, LI Min, ZHU Ping and CHEN Yu	2013	Journal of Southern Agriculture	103.87	30.71	Oryza sativa L.	Monocotyledon	Graminae	Herbaceous	Maturity period	Later period	Yield	-25kPa	Medium stress	15d	Short-term coercion	3	3	52.91	9.16428	67.63	11.7139
3	54	GUO Hui, MA Jun, LI Shuxing, LI Min, ZHU Ping and CHEN Yu	2013	Journal of Southern Agriculture	103.87	30.71	Oryza sativa L.	Monocotyledon	Graminae	Herbaceous	Maturity period	Later period	Yield	-50kPa	Heavy stress	15d	Short-term coercion	3	3	56.03	9.70468	67.63	11.7139
3	55	GUO Hui, MA Jun, LI Shuxing, LI Min, ZHU Ping and CHEN Yu	2013	Journal of Southern Agriculture	103.87	30.71	Oryza sativa L.	Monocotyledon	Graminae	Herbaceous	Maturity period	Later period	Yield	-25kPa	Medium stress	15d	Short-term coercion	3	3	53.22	9.21797	73.35	12.7046
3	56	GUO Hui, MA Jun, LI Shuxing, LI Min, ZHU Ping and CHEN Yu	2013	Journal of Southern Agriculture	103.87	30.71	Oryza sativa L.	Monocotyledon	Graminae	Herbaceous	Maturity period	Later period	Yield	-50kPa	Heavy stress	15d	Short-term coercion	3	3	54.45	9.43102	73.35	12.7046
4	57	WU Longmei, CHEN Dewei, LU LIwei, HUANG Min, ZHANG Yu, XU Shihong, TANG Guorong, TIAN Lümiao and JIANG Ligeng	2014	Journal of Southern Agriculture	108.3	22.84	Oryza sativa L.	Monocotyledon	Graminae	Herbaceous	Maturity period	Later period	MDA	0.9	Mild stress	15d	Short-term coercion	11	11	7.52	2.4941	7.52	2.4941
4	58	WU Longmei, CHEN Dewei, LU LIwei, HUANG Min, ZHANG Yu, XU Shihong, TANG Guorong, TIAN Lümiao and JIANG Ligeng	2014	Journal of Southern Agriculture	108.3	22.84	Oryza sativa L.	Monocotyledon	Graminae	Herbaceous	Maturity period	Later period	MDA	0.8	Mild stress	15d	Short-term coercion	11	11	8.73	2.89541	7.52	2.4941
4	59	WU Longmei, CHEN Dewei, LU LIwei, HUANG Min, ZHANG Yu, XU Shihong, TANG Guorong, TIAN Lümiao and JIANG Ligeng	2014	Journal of Southern Agriculture	108.3	22.84	Oryza sativa L.	Monocotyledon	Graminae	Herbaceous	Maturity period	Later period	MDA	0.7	Mild stress	15d	Short-term coercion	11	11	8.26	2.73953	7.52	2.4941
4	60	WU Longmei, CHEN Dewei, LU LIwei, HUANG Min, ZHANG Yu, XU Shihong, TANG Guorong, TIAN Lümiao and JIANG Ligeng	2014	Journal of Southern Agriculture	108.3	22.84	Oryza sativa L.	Monocotyledon	Graminae	Herbaceous	Maturity period	Later period	MDA	0.6	Medium stress	15d	Short-term coercion	11	11	8.05	2.66988	7.52	2.4941
4	61	WU Longmei, CHEN Dewei, LU LIwei, HUANG Min, ZHANG Yu, XU Shihong, TANG Guorong, TIAN Lümiao and JIANG Ligeng	2014	Journal of Southern Agriculture	108.3	22.84	Oryza sativa L.	Monocotyledon	Graminae	Herbaceous	Period of grouting	Mid period	MDA	0.9	Mild stress	15d	Short-term coercion	11	11	13.94	4.62337	10.97	3.63834
4	62	WU Longmei, CHEN Dewei, LU LIwei, HUANG Min, ZHANG Yu, XU Shihong, TANG Guorong, TIAN Lümiao and JIANG Ligeng	2014	Journal of Southern Agriculture	108.3	22.84	Oryza sativa L.	Monocotyledon	Graminae	Herbaceous	Period of grouting	Mid period	MDA	0.8	Mild stress	15d	Short-term coercion	11	11	20.52	6.80571	10.97	3.63834
4	63	WU Longmei, CHEN Dewei, LU LIwei, HUANG Min, ZHANG Yu, XU Shihong, TANG Guorong, TIAN Lümiao and JIANG Ligeng	2014	Journal of Southern Agriculture	108.3	22.84	Oryza sativa L.	Monocotyledon	Graminae	Herbaceous	Period of grouting	Mid period	MDA	0.7	Mild stress	15d	Short-term coercion	11	11	23.92	7.93337	10.97	3.63834
4	64	WU Longmei, CHEN Dewei, LU LIwei, HUANG Min, ZHANG Yu, XU Shihong, TANG Guorong, TIAN Lümiao and JIANG Ligeng	2014	Journal of Southern Agriculture	108.3	22.84	Oryza sativa L.	Monocotyledon	Graminae	Herbaceous	Period of grouting	Mid period	MDA	0.6	Medium stress	15d	Short-term coercion	11	11	17.65	5.85384	10.97	3.63834
4	65	WU Longmei, CHEN Dewei, LU LIwei, HUANG Min, ZHANG Yu, XU Shihong, TANG Guorong, TIAN Lümiao and JIANG Ligeng	2014	Journal of Southern Agriculture	108.3	22.84	Oryza sativa L.	Monocotyledon	Graminae	Herbaceous	Maturity period	Later period	Soluble protein	0.9	Mild stress	15d	Short-term coercion	11	11	27.02	8.96152	24.97	8.28161
4	66	WU Longmei, CHEN Dewei, LU LIwei, HUANG Min, ZHANG Yu, XU Shihong, TANG Guorong, TIAN Lümiao and JIANG Ligeng	2014	Journal of Southern Agriculture	108.3	22.84	Oryza sativa L.	Monocotyledon	Graminae	Herbaceous	Maturity period	Later period	Soluble protein	0.8	Mild stress	15d	Short-term coercion	11	11	33.07	10.9681	24.97	8.28161
4	67	WU Longmei, CHEN Dewei, LU LIwei, HUANG Min, ZHANG Yu, XU Shihong, TANG Guorong, TIAN Lümiao and JIANG Ligeng	2014	Journal of Southern Agriculture	108.3	22.84	Oryza sativa L.	Monocotyledon	Graminae	Herbaceous	Maturity period	Later period	Soluble protein	0.7	Mild stress	15d	Short-term coercion	11	11	38.51	12.7723	24.97	8.28161
4	68	WU Longmei, CHEN Dewei, LU LIwei, HUANG Min, ZHANG Yu, XU Shihong, TANG Guorong, TIAN Lümiao and JIANG Ligeng	2014	Journal of Southern Agriculture	108.3	22.84	Oryza sativa L.	Monocotyledon	Graminae	Herbaceous	Maturity period	Later period	Soluble protein	0.6	Medium stress	15d	Short-term coercion	11	11	38.49	12.7657	24.97	8.28161
4	69	WU Longmei, CHEN Dewei, LU LIwei, HUANG Min, ZHANG Yu, XU Shihong, TANG Guorong, TIAN Lümiao and JIANG Ligeng	2014	Journal of Southern Agriculture	108.3	22.84	Oryza sativa L.	Monocotyledon	Graminae	Herbaceous	Period of grouting	Mid period	Soluble protein	0.9	Mild stress	15d	Short-term coercion	11	11	17.74	5.88369	13.59	4.50729
4	70	WU Longmei, CHEN Dewei, LU LIwei, HUANG Min, ZHANG Yu, XU Shihong, TANG Guorong, TIAN Lümiao and JIANG Ligeng	2014	Journal of Southern Agriculture	108.3	22.84	Oryza sativa L.	Monocotyledon	Graminae	Herbaceous	Period of grouting	Mid period	Soluble protein	0.8	Mild stress	15d	Short-term coercion	11	11	19.36	6.42099	13.59	4.50729
4	71	WU Longmei, CHEN Dewei, LU LIwei, HUANG Min, ZHANG Yu, XU Shihong, TANG Guorong, TIAN Lümiao and JIANG Ligeng	2014	Journal of Southern Agriculture	108.3	22.84	Oryza sativa L.	Monocotyledon	Graminae	Herbaceous	Period of grouting	Mid period	Soluble protein	0.7	Mild stress	15d	Short-term coercion	11	11	18.99	6.29827	13.59	4.50729
4	72	WU Longmei, CHEN Dewei, LU LIwei, HUANG Min, ZHANG Yu, XU Shihong, TANG Guorong, TIAN Lümiao and JIANG Ligeng	2014	Journal of Southern Agriculture	108.3	22.84	Oryza sativa L.	Monocotyledon	Graminae	Herbaceous	Period of grouting	Mid period	Soluble protein	0.6	Medium stress	15d	Short-term coercion	11	11	17.99	5.96661	13.59	4.50729
4	73	WU Longmei, CHEN Dewei, LU LIwei, HUANG Min, ZHANG Yu, XU Shihong, TANG Guorong, TIAN Lümiao and JIANG Ligeng	2014	Journal of Southern Agriculture	108.3	22.84	Oryza sativa L.	Monocotyledon	Graminae	Herbaceous	Maturity period	Later period	Proline	0.9	Mild stress	15d	Short-term coercion	11	11	84.26	27.9459	75.53	25.0505
4	74	WU Longmei, CHEN Dewei, LU LIwei, HUANG Min, ZHANG Yu, XU Shihong, TANG Guorong, TIAN Lümiao and JIANG Ligeng	2014	Journal of Southern Agriculture	108.3	22.84	Oryza sativa L.	Monocotyledon	Graminae	Herbaceous	Maturity period	Later period	Proline	0.8	Mild stress	15d	Short-term coercion	11	11	113.29	37.574	75.53	25.0505
4	75	WU Longmei, CHEN Dewei, LU LIwei, HUANG Min, ZHANG Yu, XU Shihong, TANG Guorong, TIAN Lümiao and JIANG Ligeng	2014	Journal of Southern Agriculture	108.3	22.84	Oryza sativa L.	Monocotyledon	Graminae	Herbaceous	Maturity period	Later period	Proline	0.7	Mild stress	15d	Short-term coercion	11	11	107.81	35.7565	75.53	25.0505
4	76	WU Longmei, CHEN Dewei, LU LIwei, HUANG Min, ZHANG Yu, XU Shihong, TANG Guorong, TIAN Lümiao and JIANG Ligeng	2014	Journal of Southern Agriculture	108.3	22.84	Oryza sativa L.	Monocotyledon	Graminae	Herbaceous	Maturity period	Later period	Proline	0.6	Medium stress	15d	Short-term coercion	11	11	106.95	35.4713	75.53	25.0505
4	77	WU Longmei, CHEN Dewei, LU LIwei, HUANG Min, ZHANG Yu, XU Shihong, TANG Guorong, TIAN Lümiao and JIANG Ligeng	2014	Journal of Southern Agriculture	108.3	22.84	Oryza sativa L.	Monocotyledon	Graminae	Herbaceous	Period of grouting	Mid period	Proline	0.9	Mild stress	15d	Short-term coercion	11	11	28.01	9.28987	30.16	10.0029
4	78	WU Longmei, CHEN Dewei, LU LIwei, HUANG Min, ZHANG Yu, XU Shihong, TANG Guorong, TIAN Lümiao and JIANG Ligeng	2014	Journal of Southern Agriculture	108.3	22.84	Oryza sativa L.	Monocotyledon	Graminae	Herbaceous	Period of grouting	Mid period	Proline	0.8	Mild stress	15d	Short-term coercion	11	11	26.12	8.66302	30.16	10.0029
4	79	WU Longmei, CHEN Dewei, LU LIwei, HUANG Min, ZHANG Yu, XU Shihong, TANG Guorong, TIAN Lümiao and JIANG Ligeng	2014	Journal of Southern Agriculture	108.3	22.84	Oryza sativa L.	Monocotyledon	Graminae	Herbaceous	Period of grouting	Mid period	Proline	0.7	Mild stress	15d	Short-term coercion	11	11	24.18	8.0196	30.16	10.0029
4	80	WU Longmei, CHEN Dewei, LU LIwei, HUANG Min, ZHANG Yu, XU Shihong, TANG Guorong, TIAN Lümiao and JIANG Ligeng	2014	Journal of Southern Agriculture	108.3	22.84	Oryza sativa L.	Monocotyledon	Graminae	Herbaceous	Period of grouting	Mid period	Proline	0.6	Medium stress	15d	Short-term coercion	11	11	22.13	7.33969	30.16	10.0029
4	81	WU Longmei, CHEN Dewei, LU LIwei, HUANG Min, ZHANG Yu, XU Shihong, TANG Guorong, TIAN Lümiao and JIANG Ligeng	2014	Journal of Southern Agriculture	108.3	22.84	Oryza sativa L.	Monocotyledon	Graminae	Herbaceous	Maturity period	Later period	Soluble sugar	0.9	Mild stress	15d	Short-term coercion	11	11	17.83	5.91354	15.96	5.29333
4	82	WU Longmei, CHEN Dewei, LU LIwei, HUANG Min, ZHANG Yu, XU Shihong, TANG Guorong, TIAN Lümiao and JIANG Ligeng	2014	Journal of Southern Agriculture	108.3	22.84	Oryza sativa L.	Monocotyledon	Graminae	Herbaceous	Maturity period	Later period	Soluble sugar	0.8	Mild stress	15d	Short-term coercion	11	11	18.51	6.13907	15.96	5.29333
4	83	WU Longmei, CHEN Dewei, LU LIwei, HUANG Min, ZHANG Yu, XU Shihong, TANG Guorong, TIAN Lümiao and JIANG Ligeng	2014	Journal of Southern Agriculture	108.3	22.84	Oryza sativa L.	Monocotyledon	Graminae	Herbaceous	Maturity period	Later period	Soluble sugar	0.7	Mild stress	15d	Short-term coercion	11	11	21.38	7.09094	15.96	5.29333
4	84	WU Longmei, CHEN Dewei, LU LIwei, HUANG Min, ZHANG Yu, XU Shihong, TANG Guorong, TIAN Lümiao and JIANG Ligeng	2014	Journal of Southern Agriculture	108.3	22.84	Oryza sativa L.	Monocotyledon	Graminae	Herbaceous	Maturity period	Later period	Soluble sugar	0.6	Medium stress	15d	Short-term coercion	11	11	20.7	6.86541	15.96	5.29333
4	85	WU Longmei, CHEN Dewei, LU LIwei, HUANG Min, ZHANG Yu, XU Shihong, TANG Guorong, TIAN Lümiao and JIANG Ligeng	2014	Journal of Southern Agriculture	108.3	22.84	Oryza sativa L.	Monocotyledon	Graminae	Herbaceous	Period of grouting	Mid period	Soluble sugar	0.9	Mild stress	15d	Short-term coercion	11	11	15.81	5.24358	14.93	4.95172
4	86	WU Longmei, CHEN Dewei, LU LIwei, HUANG Min, ZHANG Yu, XU Shihong, TANG Guorong, TIAN Lümiao and JIANG Ligeng	2014	Journal of Southern Agriculture	108.3	22.84	Oryza sativa L.	Monocotyledon	Graminae	Herbaceous	Period of grouting	Mid period	Soluble sugar	0.8	Mild stress	15d	Short-term coercion	11	11	19.58	6.49395	14.93	4.95172
4	87	WU Longmei, CHEN Dewei, LU LIwei, HUANG Min, ZHANG Yu, XU Shihong, TANG Guorong, TIAN Lümiao and JIANG Ligeng	2014	Journal of Southern Agriculture	108.3	22.84	Oryza sativa L.	Monocotyledon	Graminae	Herbaceous	Period of grouting	Mid period	Soluble sugar	0.7	Mild stress	15d	Short-term coercion	11	11	21.28	7.05778	14.93	4.95172
4	88	WU Longmei, CHEN Dewei, LU LIwei, HUANG Min, ZHANG Yu, XU Shihong, TANG Guorong, TIAN Lümiao and JIANG Ligeng	2014	Journal of Southern Agriculture	108.3	22.84	Oryza sativa L.	Monocotyledon	Graminae	Herbaceous	Period of grouting	Mid period	Soluble sugar	0.6	Medium stress	15d	Short-term coercion	11	11	20.8	6.89858	14.93	4.95172
4	89	WU Longmei, CHEN Dewei, LU LIwei, HUANG Min, ZHANG Yu, XU Shihong, TANG Guorong, TIAN Lümiao and JIANG Ligeng	2014	Journal of Southern Agriculture	108.3	22.84	Oryza sativa L.	Monocotyledon	Graminae	Herbaceous	Maturity period	Later period	SPAD	0.9	Mild stress	15d	Short-term coercion	11	11	40.74	13.5119	39.54	13.1139
4	90	WU Longmei, CHEN Dewei, LU LIwei, HUANG Min, ZHANG Yu, XU Shihong, TANG Guorong, TIAN Lümiao and JIANG Ligeng	2014	Journal of Southern Agriculture	108.3	22.84	Oryza sativa L.	Monocotyledon	Graminae	Herbaceous	Maturity period	Later period	SPAD	0.8	Mild stress	15d	Short-term coercion	11	11	41.25	13.6811	39.54	13.1139
4	91	WU Longmei, CHEN Dewei, LU LIwei, HUANG Min, ZHANG Yu, XU Shihong, TANG Guorong, TIAN Lümiao and JIANG Ligeng	2014	Journal of Southern Agriculture	108.3	22.84	Oryza sativa L.	Monocotyledon	Graminae	Herbaceous	Maturity period	Later period	SPAD	0.7	Mild stress	15d	Short-term coercion	11	11	42.69	14.1587	39.54	13.1139
4	92	WU Longmei, CHEN Dewei, LU LIwei, HUANG Min, ZHANG Yu, XU Shihong, TANG Guorong, TIAN Lümiao and JIANG Ligeng	2014	Journal of Southern Agriculture	108.3	22.84	Oryza sativa L.	Monocotyledon	Graminae	Herbaceous	Maturity period	Later period	SPAD	0.6	Medium stress	15d	Short-term coercion	11	11	44.01	14.5965	39.54	13.1139
4	93	WU Longmei, CHEN Dewei, LU LIwei, HUANG Min, ZHANG Yu, XU Shihong, TANG Guorong, TIAN Lümiao and JIANG Ligeng	2014	Journal of Southern Agriculture	108.3	22.84	Oryza sativa L.	Monocotyledon	Graminae	Herbaceous	Period of grouting	Mid period	SPAD	0.9	Mild stress	15d	Short-term coercion	11	11	38.54	12.7823	34.85	11.5584
4	94	WU Longmei, CHEN Dewei, LU LIwei, HUANG Min, ZHANG Yu, XU Shihong, TANG Guorong, TIAN Lümiao and JIANG Ligeng	2014	Journal of Southern Agriculture	108.3	22.84	Oryza sativa L.	Monocotyledon	Graminae	Herbaceous	Period of grouting	Mid period	SPAD	0.8	Mild stress	15d	Short-term coercion	11	11	38.51	12.7723	34.85	11.5584
4	95	WU Longmei, CHEN Dewei, LU LIwei, HUANG Min, ZHANG Yu, XU Shihong, TANG Guorong, TIAN Lümiao and JIANG Ligeng	2014	Journal of Southern Agriculture	108.3	22.84	Oryza sativa L.	Monocotyledon	Graminae	Herbaceous	Period of grouting	Mid period	SPAD	0.7	Mild stress	15d	Short-term coercion	11	11	33.47	11.1007	34.85	11.5584
4	96	WU Longmei, CHEN Dewei, LU LIwei, HUANG Min, ZHANG Yu, XU Shihong, TANG Guorong, TIAN Lümiao and JIANG Ligeng	2014	Journal of Southern Agriculture	108.3	22.84	Oryza sativa L.	Monocotyledon	Graminae	Herbaceous	Period of grouting	Mid period	SPAD	0.6	Medium stress	15d	Short-term coercion	11	11	33.91	11.2467	34.85	11.5584
4	97	WU Longmei, CHEN Dewei, LU LIwei, HUANG Min, ZHANG Yu, XU Shihong, TANG Guorong, TIAN Lümiao and JIANG Ligeng	2014	Journal of Southern Agriculture	108.3	22.84	Oryza sativa L.	Monocotyledon	Graminae	Herbaceous	Maturity period	Later period	Yield	0.9	Mild stress	15d	Short-term coercion	11	11	34.95	11.5916	29.58	9.81058
4	98	WU Longmei, CHEN Dewei, LU LIwei, HUANG Min, ZHANG Yu, XU Shihong, TANG Guorong, TIAN Lümiao and JIANG Ligeng	2014	Journal of Southern Agriculture	108.3	22.84	Oryza sativa L.	Monocotyledon	Graminae	Herbaceous	Maturity period	Later period	Yield	0.8	Mild stress	15d	Short-term coercion	11	11	27.76	9.20695	29.58	9.81058
4	99	WU Longmei, CHEN Dewei, LU LIwei, HUANG Min, ZHANG Yu, XU Shihong, TANG Guorong, TIAN Lümiao and JIANG Ligeng	2014	Journal of Southern Agriculture	108.3	22.84	Oryza sativa L.	Monocotyledon	Graminae	Herbaceous	Maturity period	Later period	Yield	0.7	Mild stress	15d	Short-term coercion	11	11	21.75	7.21366	29.58	9.81058
4	100	WU Longmei, CHEN Dewei, LU LIwei, HUANG Min, ZHANG Yu, XU Shihong, TANG Guorong, TIAN Lümiao and JIANG Ligeng	2014	Journal of Southern Agriculture	108.3	22.84	Oryza sativa L.	Monocotyledon	Graminae	Herbaceous	Maturity period	Later period	Yield	0.6	Medium stress	15d	Short-term coercion	11	11	20.46	6.78581	29.58	9.81058
4	101	WU Longmei, CHEN Dewei, LU LIwei, HUANG Min, ZHANG Yu, XU Shihong, TANG Guorong, TIAN Lümiao and JIANG Ligeng	2014	Journal of Southern Agriculture	108.3	22.84	Oryza sativa L.	Monocotyledon	Graminae	Herbaceous	Period of grouting	Mid period	Yield	0.9	Mild stress	15d	Short-term coercion	11	11	32.8	10.8785	29.57	9.80726
4	102	WU Longmei, CHEN Dewei, LU LIwei, HUANG Min, ZHANG Yu, XU Shihong, TANG Guorong, TIAN Lümiao and JIANG Ligeng	2014	Journal of Southern Agriculture	108.3	22.84	Oryza sativa L.	Monocotyledon	Graminae	Herbaceous	Period of grouting	Mid period	Yield	0.8	Mild stress	15d	Short-term coercion	11	11	29.53	9.79399	29.57	9.80726
4	103	WU Longmei, CHEN Dewei, LU LIwei, HUANG Min, ZHANG Yu, XU Shihong, TANG Guorong, TIAN Lümiao and JIANG Ligeng	2014	Journal of Southern Agriculture	108.3	22.84	Oryza sativa L.	Monocotyledon	Graminae	Herbaceous	Period of grouting	Mid period	Yield	0.7	Mild stress	15d	Short-term coercion	11	11	25.02	8.2982	29.57	9.80726
4	104	WU Longmei, CHEN Dewei, LU LIwei, HUANG Min, ZHANG Yu, XU Shihong, TANG Guorong, TIAN Lümiao and JIANG Ligeng	2014	Journal of Southern Agriculture	108.3	22.84	Oryza sativa L.	Monocotyledon	Graminae	Herbaceous	Period of grouting	Mid period	Yield	0.6	Medium stress	15d	Short-term coercion	11	11	23.07	7.65145	29.57	9.80726
5	105	CHEN Liang, WANG Benfu, JIANG Yuanyuan, CAO Cougui and LI Ping	2016	China Rice	114.36	30.48	Oryza sativa L.	Monocotyledon	Graminae	Herbaceous	Maturity period	Later period	Pn	0.8	Mild stress	13d	Short-term coercion	12	12	15.5	3.4641	14.7	3.11769
5	106	CHEN Liang, WANG Benfu, JIANG Yuanyuan, CAO Cougui and LI Ping	2016	China Rice	114.36	30.48	Oryza sativa L.	Monocotyledon	Graminae	Herbaceous	Maturity period	Later period	Pn	0.75	Mild stress	13d	Short-term coercion	12	12	15	2.42487	14.7	3.11769
5	107	CHEN Liang, WANG Benfu, JIANG Yuanyuan, CAO Cougui and LI Ping	2016	China Rice	114.36	30.48	Oryza sativa L.	Monocotyledon	Graminae	Herbaceous	Maturity period	Later period	Pn	0.5	Medium stress	13d	Short-term coercion	12	12	13.6	4.84974	14.7	3.11769
5	108	CHEN Liang, WANG Benfu, JIANG Yuanyuan, CAO Cougui and LI Ping	2016	China Rice	114.36	30.48	Oryza sativa L.	Monocotyledon	Graminae	Herbaceous	Maturity period	Later period	SOD	0.8	Mild stress	13d	Short-term coercion	12	12	410	93.5307	416	65.8179
5	109	CHEN Liang, WANG Benfu, JIANG Yuanyuan, CAO Cougui and LI Ping	2016	China Rice	114.36	30.48	Oryza sativa L.	Monocotyledon	Graminae	Herbaceous	Maturity period	Later period	SOD	0.75	Mild stress	13d	Short-term coercion	12	12	443	103.923	416	65.8179
5	110	CHEN Liang, WANG Benfu, JIANG Yuanyuan, CAO Cougui and LI Ping	2016	China Rice	114.36	30.48	Oryza sativa L.	Monocotyledon	Graminae	Herbaceous	Maturity period	Later period	SOD	0.5	Medium stress	13d	Short-term coercion	12	12	423	31.1769	416	65.8179
5	111	CHEN Liang, WANG Benfu, JIANG Yuanyuan, CAO Cougui and LI Ping	2016	China Rice	114.36	30.48	Oryza sativa L.	Monocotyledon	Graminae	Herbaceous	Maturity period	Later period	SOD	0.8	Mild stress	15d	Short-term coercion	12	12	430	51.9615	340	58.8897
5	112	CHEN Liang, WANG Benfu, JIANG Yuanyuan, CAO Cougui and LI Ping	2016	China Rice	114.36	30.48	Oryza sativa L.	Monocotyledon	Graminae	Herbaceous	Maturity period	Later period	SOD	0.75	Mild stress	15d	Short-term coercion	12	12	444	51.9615	340	58.8897
5	113	CHEN Liang, WANG Benfu, JIANG Yuanyuan, CAO Cougui and LI Ping	2016	China Rice	114.36	30.48	Oryza sativa L.	Monocotyledon	Graminae	Herbaceous	Maturity period	Later period	SOD	0.5	Medium stress	15d	Short-term coercion	12	12	453	69.282	340	58.8897
5	114	CHEN Liang, WANG Benfu, JIANG Yuanyuan, CAO Cougui and LI Ping	2016	China Rice	114.36	30.48	Oryza sativa L.	Monocotyledon	Graminae	Herbaceous	Maturity period	Later period	POD	0.8	Mild stress	13d	Short-term coercion	12	12	8584	1441.07	8639	471.118
5	115	CHEN Liang, WANG Benfu, JIANG Yuanyuan, CAO Cougui and LI Ping	2016	China Rice	114.36	30.48	Oryza sativa L.	Monocotyledon	Graminae	Herbaceous	Maturity period	Later period	POD	0.75	Mild stress	13d	Short-term coercion	12	12	8443	1683.55	8639	471.118
5	116	CHEN Liang, WANG Benfu, JIANG Yuanyuan, CAO Cougui and LI Ping	2016	China Rice	114.36	30.48	Oryza sativa L.	Monocotyledon	Graminae	Herbaceous	Maturity period	Later period	POD	0.5	Medium stress	13d	Short-term coercion	12	12	8424	5130.33	8639	471.118
5	117	CHEN Liang, WANG Benfu, JIANG Yuanyuan, CAO Cougui and LI Ping	2016	China Rice	114.36	30.48	Oryza sativa L.	Monocotyledon	Graminae	Herbaceous	Maturity period	Later period	POD	0.8	Mild stress	15d	Short-term coercion	12	12	3639	3737.77	2031	349.874
5	118	CHEN Liang, WANG Benfu, JIANG Yuanyuan, CAO Cougui and LI Ping	2016	China Rice	114.36	30.48	Oryza sativa L.	Monocotyledon	Graminae	Herbaceous	Maturity period	Later period	POD	0.75	Mild stress	15d	Short-term coercion	12	12	4460	315.233	2031	349.874
5	119	CHEN Liang, WANG Benfu, JIANG Yuanyuan, CAO Cougui and LI Ping	2016	China Rice	114.36	30.48	Oryza sativa L.	Monocotyledon	Graminae	Herbaceous	Maturity period	Later period	POD	0.5	Medium stress	15d	Short-term coercion	12	12	4503	599.29	2031	349.874
5	120	CHEN Liang, WANG Benfu, JIANG Yuanyuan, CAO Cougui and LI Ping	2016	China Rice	114.36	30.48	Oryza sativa L.	Monocotyledon	Graminae	Herbaceous	Maturity period	Later period	CAT	0.8	Mild stress	13d	Short-term coercion	12	12	364	45.0333	362	20.7846
5	121	CHEN Liang, WANG Benfu, JIANG Yuanyuan, CAO Cougui and LI Ping	2016	China Rice	114.36	30.48	Oryza sativa L.	Monocotyledon	Graminae	Herbaceous	Maturity period	Later period	CAT	0.75	Mild stress	13d	Short-term coercion	12	12	368	38.1051	362	20.7846
5	122	CHEN Liang, WANG Benfu, JIANG Yuanyuan, CAO Cougui and LI Ping	2016	China Rice	114.36	30.48	Oryza sativa L.	Monocotyledon	Graminae	Herbaceous	Maturity period	Later period	CAT	0.5	Medium stress	13d	Short-term coercion	12	12	384	180.133	362	20.7846
5	123	CHEN Liang, WANG Benfu, JIANG Yuanyuan, CAO Cougui and LI Ping	2016	China Rice	114.36	30.48	Oryza sativa L.	Monocotyledon	Graminae	Herbaceous	Maturity period	Later period	CAT	0.8	Mild stress	15d	Short-term coercion	12	12	279	17.3205	277	27.7128
5	124	CHEN Liang, WANG Benfu, JIANG Yuanyuan, CAO Cougui and LI Ping	2016	China Rice	114.36	30.48	Oryza sativa L.	Monocotyledon	Graminae	Herbaceous	Maturity period	Later period	CAT	0.75	Mild stress	15d	Short-term coercion	12	12	336	96.9948	277	27.7128
5	125	CHEN Liang, WANG Benfu, JIANG Yuanyuan, CAO Cougui and LI Ping	2016	China Rice	114.36	30.48	Oryza sativa L.	Monocotyledon	Graminae	Herbaceous	Maturity period	Later period	CAT	0.5	Medium stress	15d	Short-term coercion	12	12	371	45.0333	277	27.7128
5	126	CHEN Liang, WANG Benfu, JIANG Yuanyuan, CAO Cougui and LI Ping	2016	China Rice	114.36	30.48	Oryza sativa L.	Monocotyledon	Graminae	Herbaceous	Maturity period	Later period	MDA	0.8	Mild stress	13d	Short-term coercion	12	12	44	11.0851	45	16.9741
5	127	CHEN Liang, WANG Benfu, JIANG Yuanyuan, CAO Cougui and LI Ping	2016	China Rice	114.36	30.48	Oryza sativa L.	Monocotyledon	Graminae	Herbaceous	Maturity period	Later period	MDA	0.75	Mild stress	13d	Short-term coercion	12	12	41.3	17.3205	45	16.9741
5	128	CHEN Liang, WANG Benfu, JIANG Yuanyuan, CAO Cougui and LI Ping	2016	China Rice	114.36	30.48	Oryza sativa L.	Monocotyledon	Graminae	Herbaceous	Maturity period	Later period	MDA	0.5	Medium stress	13d	Short-term coercion	12	12	41.2	5.19615	45	16.9741
5	129	CHEN Liang, WANG Benfu, JIANG Yuanyuan, CAO Cougui and LI Ping	2016	China Rice	114.36	30.48	Oryza sativa L.	Monocotyledon	Graminae	Herbaceous	Maturity period	Later period	MDA	0.8	Mild stress	15d	Short-term coercion	12	12	40.4	16.2813	38.9	10.0459
5	130	CHEN Liang, WANG Benfu, JIANG Yuanyuan, CAO Cougui and LI Ping	2016	China Rice	114.36	30.48	Oryza sativa L.	Monocotyledon	Graminae	Herbaceous	Maturity period	Later period	MDA	0.75	Mild stress	15d	Short-term coercion	12	12	39.8	3.4641	38.9	10.0459
5	131	CHEN Liang, WANG Benfu, JIANG Yuanyuan, CAO Cougui and LI Ping	2016	China Rice	114.36	30.48	Oryza sativa L.	Monocotyledon	Graminae	Herbaceous	Maturity period	Later period	MDA	0.5	Medium stress	15d	Short-term coercion	12	12	39.3	12.4708	38.9	10.0459
5	132	CHEN Liang, WANG Benfu, JIANG Yuanyuan, CAO Cougui and LI Ping	2016	China Rice	114.36	30.48	Oryza sativa L.	Monocotyledon	Graminae	Herbaceous	Maturity period	Later period	Yield	0.8	Mild stress	13d	Short-term coercion	12	12	63.7	2.25167	68.9	14.3414
5	133	CHEN Liang, WANG Benfu, JIANG Yuanyuan, CAO Cougui and LI Ping	2016	China Rice	114.36	30.48	Oryza sativa L.	Monocotyledon	Graminae	Herbaceous	Maturity period	Later period	Yield	0.75	Mild stress	13d	Short-term coercion	12	12	56.9	9.6302	68.9	14.3414
5	134	CHEN Liang, WANG Benfu, JIANG Yuanyuan, CAO Cougui and LI Ping	2016	China Rice	114.36	30.48	Oryza sativa L.	Monocotyledon	Graminae	Herbaceous	Maturity period	Later period	Yield	0.5	Medium stress	13d	Short-term coercion	12	12	45.4	4.60726	68.9	14.3414
5	135	CHEN Liang, WANG Benfu, JIANG Yuanyuan, CAO Cougui and LI Ping	2016	China Rice	114.36	30.48	Oryza sativa L.	Monocotyledon	Graminae	Herbaceous	Maturity period	Later period	Yield	0.8	Mild stress	15d	Short-term coercion	12	12	40	2.04382	44.7	2.8752
5	136	CHEN Liang, WANG Benfu, JIANG Yuanyuan, CAO Cougui and LI Ping	2016	China Rice	114.36	30.48	Oryza sativa L.	Monocotyledon	Graminae	Herbaceous	Maturity period	Later period	Yield	0.75	Mild stress	15d	Short-term coercion	12	12	38.3	3.32554	44.7	2.8752
5	137	CHEN Liang, WANG Benfu, JIANG Yuanyuan, CAO Cougui and LI Ping	2016	China Rice	114.36	30.48	Oryza sativa L.	Monocotyledon	Graminae	Herbaceous	Maturity period	Later period	Yield	0.5	Medium stress	15d	Short-term coercion	12	12	23.3	11.7433	44.7	2.8752
6	138	LUO Honghai, ZHANG Yali, ZHANG Wangfeng, BAI Huidong, HE Zaiju, DU MingWei and ZHANG Hongzhi	1997	Acta Agronomica Sinica	86.06	44.31	Gossypium spp	Dicotyledons	Malvaceae	Woody	The flowering bell stage	Mid period	Dry matter	0.6	Medium stress	15d	Short-term coercion	3	3	75.4023	26.2794	97.2414	31.8538
6	139	LUO Honghai, ZHANG Yali, ZHANG Wangfeng, BAI Huidong, HE Zaiju, DU MingWei and ZHANG Hongzhi	1997	Acta Agronomica Sinica	86.06	44.31	Gossypium spp	Dicotyledons	Malvaceae	Woody	The flowering bell stage	Mid period	Dry matter	0.45	Heavy stress	15d	Short-term coercion	3	3	33.3333	15.1306	97.2414	31.8538
6	140	LUO Honghai, ZHANG Yali, ZHANG Wangfeng, BAI Huidong, HE Zaiju, DU MingWei and ZHANG Hongzhi	1997	Acta Agronomica Sinica	86.06	44.31	Gossypium spp	Dicotyledons	Malvaceae	Woody	The flowering bell stage	Mid period	Yield	0.6	Medium stress	15d	Short-term coercion	3	3	1703.8	137.871	2278.2	117.433
6	141	LUO Honghai, ZHANG Yali, ZHANG Wangfeng, BAI Huidong, HE Zaiju, DU MingWei and ZHANG Hongzhi	1997	Acta Agronomica Sinica	86.06	44.31	Gossypium spp	Dicotyledons	Malvaceae	Woody	The flowering bell stage	Mid period	Yield	0.45	Heavy stress	15d	Short-term coercion	3	3	959.7	151.554	2278.2	117.433
7	142	YANG Lili, REN Jianhong, LIU Yijian, YIN Lina, DENG Xiping, WANG Shiwen	2020	Acta Botanica Boreali-Occidentalia Sinica	108.08	34.28	Triticum aestivum L.	Monocotyledon	Graminae	Herbaceous	Period of grouting	Mid period	Yield	0.55	Medium stress	12d	Short-term coercion	5	5	14.4	3.21994	12.72	2.83981
7	143	YANG Lili, REN Jianhong, LIU Yijian, YIN Lina, DENG Xiping, WANG Shiwen	2020	Acta Botanica Boreali-Occidentalia Sinica	108.08	34.28	Triticum aestivum L.	Monocotyledon	Graminae	Herbaceous	Period of grouting	Mid period	Yield	0.35	Heavy stress	12d	Short-term coercion	5	5	11.36	2.54912	12.72	2.83981
7	144	YANG Lili, REN Jianhong, LIU Yijian, YIN Lina, DENG Xiping, WANG Shiwen	2020	Acta Botanica Boreali-Occidentalia Sinica	108.08	34.28	Triticum aestivum L.	Monocotyledon	Graminae	Herbaceous	Period of grouting	Mid period	WUE	0.55	Medium stress	12d	Short-term coercion	5	5	1.75	0.402492	1.59	0.357771
7	145	YANG Lili, REN Jianhong, LIU Yijian, YIN Lina, DENG Xiping, WANG Shiwen	2020	Acta Botanica Boreali-Occidentalia Sinica	108.08	34.28	Triticum aestivum L.	Monocotyledon	Graminae	Herbaceous	Period of grouting	Mid period	WUE	0.35	Heavy stress	12d	Short-term coercion	5	5	1.71	0.380132	1.59	0.357771
7	146	YANG Lili, REN Jianhong, LIU Yijian, YIN Lina, DENG Xiping, WANG Shiwen	2020	Acta Botanica Boreali-Occidentalia Sinica	108.08	34.28	Triticum aestivum L.	Monocotyledon	Graminae	Herbaceous	Period of grouting	Mid period	Pn	0.55	Medium stress	12d	Short-term coercion	5	5	8.62069	1.92302	10.3448	2.30315
7	147	YANG Lili, REN Jianhong, LIU Yijian, YIN Lina, DENG Xiping, WANG Shiwen	2020	Acta Botanica Boreali-Occidentalia Sinica	108.08	34.28	Triticum aestivum L.	Monocotyledon	Graminae	Herbaceous	Period of grouting	Mid period	Pn	0.35	Heavy stress	12d	Short-term coercion	5	5	5.28736	1.18512	10.34	2.30315
7	148	YANG Lili, REN Jianhong, LIU Yijian, YIN Lina, DENG Xiping, WANG Shiwen	2020	Acta Botanica Boreali-Occidentalia Sinica	108.08	34.28	Triticum aestivum L.	Monocotyledon	Graminae	Herbaceous	Period of grouting	Mid period	Gs	0.55	Medium stress	12d	Short-term coercion	5	5	0.170115	0.0616846	0.153257	0.0514039
7	149	YANG Lili, REN Jianhong, LIU Yijian, YIN Lina, DENG Xiping, WANG Shiwen	2020	Acta Botanica Boreali-Occidentalia Sinica	108.08	34.28	Triticum aestivum L.	Monocotyledon	Graminae	Herbaceous	Period of grouting	Mid period	Gs	0.35	Heavy stress	12d	Short-term coercion	5	5	0.122605	0.0788193	1.15326	2.28747
7	150	YANG Lili, REN Jianhong, LIU Yijian, YIN Lina, DENG Xiping, WANG Shiwen	2020	Acta Botanica Boreali-Occidentalia Sinica	108.08	34.28	Triticum aestivum L.	Monocotyledon	Graminae	Herbaceous	Period of grouting	Mid period	Tr	0.55	Medium stress	12d	Short-term coercion	5	5	3.92366	1.43381	4.06107	1.50209
7	151	YANG Lili, REN Jianhong, LIU Yijian, YIN Lina, DENG Xiping, WANG Shiwen	2020	Acta Botanica Boreali-Occidentalia Sinica	108.08	34.28	Triticum aestivum L.	Monocotyledon	Graminae	Herbaceous	Period of grouting	Mid period	Tr	0.35	Heavy stress	12d	Short-term coercion	5	5	3.81679	1.02415	4.06107	1.50209
7	152	YANG Lili, REN Jianhong, LIU Yijian, YIN Lina, DENG Xiping, WANG Shiwen	2020	Acta Botanica Boreali-Occidentalia Sinica	108.08	34.28	Triticum aestivum L.	Monocotyledon	Graminae	Herbaceous	Period of grouting	Mid period	chlorophyll content	0.55	Medium stress	12d	Short-term coercion	5	5	17.7625	1.91908	18.4981	1.91908
7	153	YANG Lili, REN Jianhong, LIU Yijian, YIN Lina, DENG Xiping, WANG Shiwen	2020	Acta Botanica Boreali-Occidentalia Sinica	108.08	34.28	Triticum aestivum L.	Monocotyledon	Graminae	Herbaceous	Period of grouting	Mid period	chlorophyll content	0.35	Heavy stress	12d	Short-term coercion	5	5	14.5747	4.11231	18.4981	1.91908
8	154	LIU Gengshan, GUO Anhong, REN Sanxue, AN Shunqing, ZHAO Huarong	2004	Chinese Journal of Ecology	115.72	39.14	Zea mays L.	Monocotyledon	Graminae	Herbaceous	Seedling stage	Preceding period	Yield	0.55	Medium stress	15d	Short-term coercion	3	3	6761.86	1171.2	7103.12	1230.29
8	155	LIU Gengshan, GUO Anhong, REN Sanxue, AN Shunqing, ZHAO Huarong	2004	Chinese Journal of Ecology	115.72	39.14	Zea mays L.	Monocotyledon	Graminae	Herbaceous	Seedling stage	Preceding period	WUE	0.55	Medium stress	15d	Short-term coercion	3	3	16.21	2.80592	12.71	2.1131
8	156	LIU Gengshan, GUO Anhong, REN Sanxue, AN Shunqing, ZHAO Huarong	2004	Chinese Journal of Ecology	115.72	39.14	Zea mays L.	Monocotyledon	Graminae	Herbaceous	Seedling stage	Preceding period	Root length	0.55	Medium stress	15d	Short-term coercion	3	3	310.762	53.8256	263.677	45.6702
9	157	MENG Zuqing, SONG Fenping, Dacizhuoga	2011	Southwest China Journal of Agricultural Sciences	91.26	29.66	Brassica juncea	Dicotyledons	Cruciferae	Herbaceous	The flowering period	Mid period	Plant height	0.5	Medium stress	7d	Short-term coercion	4	4	101.33	20.266	118.67	23.734
9	158	MENG Zuqing, SONG Fenping, Dacizhuoga	2011	Southwest China Journal of Agricultural Sciences	91.26	29.66	Brassica juncea	Dicotyledons	Cruciferae	Herbaceous	The flowering period	Mid period	Plant height	0.5	Medium stress	14d	Short-term coercion	4	4	109.33	21.866	130.67	26.134
9	159	MENG Zuqing, SONG Fenping, Dacizhuoga	2011	Southwest China Journal of Agricultural Sciences	91.26	29.66	Brassica juncea	Dicotyledons	Cruciferae	Herbaceous	The flowering period	Mid period	Plant height	0.5	Medium stress	21d	Medium-term stress	4	4	123	24.6	176.67	35.334
9	160	MENG Zuqing, SONG Fenping, Dacizhuoga	2011	Southwest China Journal of Agricultural Sciences	91.26	29.66	Brassia campestris L.	Dicotyledons	Cruciferae	Herbaceous	The flowering period	Mid period	Plant height	0.5	Medium stress	7d	Short-term coercion	4	4	80.77	16.154	95.67	19.134
9	161	MENG Zuqing, SONG Fenping, Dacizhuoga	2011	Southwest China Journal of Agricultural Sciences	91.26	29.66	Brassia campestris L.	Dicotyledons	Cruciferae	Herbaceous	The flowering period	Mid period	Plant height	0.5	Medium stress	14d	Short-term coercion	4	4	91.83	18.366	110.83	22.166
9	162	MENG Zuqing, SONG Fenping, Dacizhuoga	2011	Southwest China Journal of Agricultural Sciences	91.26	29.66	Brassia campestris L.	Dicotyledons	Cruciferae	Herbaceous	The flowering period	Mid period	Plant height	0.5	Medium stress	21d	Medium-term stress	4	4	105	21	134.33	26.866
9	163	MENG Zuqing, SONG Fenping, Dacizhuoga	2011	Southwest China Journal of Agricultural Sciences	91.26	29.66	Brassica napus L.	Dicotyledons	Cruciferae	Herbaceous	The flowering period	Mid period	Plant height	0.5	Medium stress	7d	Short-term coercion	4	4	56.33	11.266	73.33	14.666
9	164	MENG Zuqing, SONG Fenping, Dacizhuoga	2011	Southwest China Journal of Agricultural Sciences	91.26	29.66	Brassica napus L.	Dicotyledons	Cruciferae	Herbaceous	The flowering period	Mid period	Plant height	0.5	Medium stress	14d	Short-term coercion	4	4	69	13.8	93.67	18.734
9	165	MENG Zuqing, SONG Fenping, Dacizhuoga	2011	Southwest China Journal of Agricultural Sciences	91.26	29.66	Brassica napus L.	Dicotyledons	Cruciferae	Herbaceous	The flowering period	Mid period	Plant height	0.5	Medium stress	21d	Medium-term stress	4	4	76	15.2	111.33	22.266
9	166	MENG Zuqing, SONG Fenping, Dacizhuoga	2011	Southwest China Journal of Agricultural Sciences	91.26	29.66	Brassica juncea	Dicotyledons	Cruciferae	Herbaceous	The flowering period	Mid period	root volume	0.5	Medium stress	7d	Short-term coercion	4	4	5.67	1.134	9	1.8
9	167	MENG Zuqing, SONG Fenping, Dacizhuoga	2011	Southwest China Journal of Agricultural Sciences	91.26	29.66	Brassica juncea	Dicotyledons	Cruciferae	Herbaceous	The flowering period	Mid period	root volume	0.5	Medium stress	14d	Short-term coercion	4	4	5.67	1.134	10.67	2.134
9	168	MENG Zuqing, SONG Fenping, Dacizhuoga	2011	Southwest China Journal of Agricultural Sciences	91.26	29.66	Brassica juncea	Dicotyledons	Cruciferae	Herbaceous	The flowering period	Mid period	root volume	0.5	Medium stress	21d	Medium-term stress	4	4	5.67	1.134	10	2
9	169	MENG Zuqing, SONG Fenping, Dacizhuoga	2011	Southwest China Journal of Agricultural Sciences	91.26	29.66	Brassia campestris L.	Dicotyledons	Cruciferae	Herbaceous	The flowering period	Mid period	root volume	0.5	Medium stress	7d	Short-term coercion	4	4	5.33	1.066	7.67	1.534
9	170	MENG Zuqing, SONG Fenping, Dacizhuoga	2011	Southwest China Journal of Agricultural Sciences	91.26	29.66	Brassia campestris L.	Dicotyledons	Cruciferae	Herbaceous	The flowering period	Mid period	root volume	0.5	Medium stress	14d	Short-term coercion	4	4	5	1	8.17	1.634
9	171	MENG Zuqing, SONG Fenping, Dacizhuoga	2011	Southwest China Journal of Agricultural Sciences	91.26	29.66	Brassia campestris L.	Dicotyledons	Cruciferae	Herbaceous	The flowering period	Mid period	root volume	0.5	Medium stress	21d	Medium-term stress	4	4	4.83	0.966	9	1.8
9	172	MENG Zuqing, SONG Fenping, Dacizhuoga	2011	Southwest China Journal of Agricultural Sciences	91.26	29.66	Brassica napus L.	Dicotyledons	Cruciferae	Herbaceous	The flowering period	Mid period	root volume	0.5	Medium stress	7d	Short-term coercion	4	4	4.67	0.934	11.17	2.234
9	173	MENG Zuqing, SONG Fenping, Dacizhuoga	2011	Southwest China Journal of Agricultural Sciences	91.26	29.66	Brassica napus L.	Dicotyledons	Cruciferae	Herbaceous	The flowering period	Mid period	root volume	0.5	Medium stress	14d	Short-term coercion	4	4	11.17	2.234	11	2.2
9	174	MENG Zuqing, SONG Fenping, Dacizhuoga	2011	Southwest China Journal of Agricultural Sciences	91.26	29.66	Brassica napus L.	Dicotyledons	Cruciferae	Herbaceous	The flowering period	Mid period	root volume	0.5	Medium stress	21d	Medium-term stress	4	4	5.67	1.134	11.17	2.234
9	175	MENG Zuqing, SONG Fenping, Dacizhuoga	2011	Southwest China Journal of Agricultural Sciences	91.26	29.66	Brassica juncea	Dicotyledons	Cruciferae	Herbaceous	The flowering period	Mid period	Yield	0.5	Medium stress	7d	Short-term coercion	4	4	17.2	3.44	19.15	3.83
9	176	MENG Zuqing, SONG Fenping, Dacizhuoga	2011	Southwest China Journal of Agricultural Sciences	91.26	29.66	Brassica juncea	Dicotyledons	Cruciferae	Herbaceous	The flowering period	Mid period	Yield	0.5	Medium stress	14d	Short-term coercion	4	4	12.43	2.486	19.15	3.83
9	177	MENG Zuqing, SONG Fenping, Dacizhuoga	2011	Southwest China Journal of Agricultural Sciences	91.26	29.66	Brassica juncea	Dicotyledons	Cruciferae	Herbaceous	The flowering period	Mid period	Yield	0.5	Medium stress	21d	Medium-term stress	4	4	8.66	1.732	19.15	3.83
9	178	MENG Zuqing, SONG Fenping, Dacizhuoga	2011	Southwest China Journal of Agricultural Sciences	91.26	29.66	Brassia campestris L.	Dicotyledons	Cruciferae	Herbaceous	The flowering period	Mid period	Yield	0.5	Medium stress	7d	Short-term coercion	4	4	5.23	1.046	6.06	1.212
9	179	MENG Zuqing, SONG Fenping, Dacizhuoga	2011	Southwest China Journal of Agricultural Sciences	91.26	29.66	Brassia campestris L.	Dicotyledons	Cruciferae	Herbaceous	The flowering period	Mid period	Yield	0.5	Medium stress	14d	Short-term coercion	4	4	3.37	0.674	6.06	1.212
9	180	MENG Zuqing, SONG Fenping, Dacizhuoga	2011	Southwest China Journal of Agricultural Sciences	91.26	29.66	Brassia campestris L.	Dicotyledons	Cruciferae	Herbaceous	The flowering period	Mid period	Yield	0.5	Medium stress	21d	Medium-term stress	4	4	2.27	0.454	6.06	1.212
9	181	MENG Zuqing, SONG Fenping, Dacizhuoga	2011	Southwest China Journal of Agricultural Sciences	91.26	29.66	Brassica napus L.	Dicotyledons	Cruciferae	Herbaceous	The flowering period	Mid period	Yield	0.5	Medium stress	7d	Short-term coercion	4	4	9.41	1.882	10.78	2.156
9	182	MENG Zuqing, SONG Fenping, Dacizhuoga	2011	Southwest China Journal of Agricultural Sciences	91.26	29.66	Brassica napus L.	Dicotyledons	Cruciferae	Herbaceous	The flowering period	Mid period	Yield	0.5	Medium stress	14d	Short-term coercion	4	4	5	1	10.78	2.156
10	183	ZHANG Lixia, GUO Xiayan, SHI Pengfei, NIE Liangpeng, LING Jingwei, SHEN Peilin, DING Li, ZHANG Li, LV Yuhu, PAI Ziliang	2023	Crops	114.31	32.16	Hibiscus cannabinus L.	Dicotyledons	Malvaceae	Woody	Vigorous Growing Period	Preceding period	Plant height	0.6	Medium stress	20d	Short-term coercion	3	3	99.96	6.70304	111.96	4.50333
10	184	ZHANG Lixia, GUO Xiayan, SHI Pengfei, NIE Liangpeng, LING Jingwei, SHEN Peilin, DING Li, ZHANG Li, LV Yuhu, PAI Ziliang	2023	Crops	114.31	32.16	Hibiscus cannabinus L.	Dicotyledons	Malvaceae	Woody	Vigorous Growing Period	Preceding period	Plant height	0.4	Heavy stress	20d	Short-term coercion	3	3	87.54	7.13605	111.96	4.50333
10	185	ZHANG Lixia, GUO Xiayan, SHI Pengfei, NIE Liangpeng, LING Jingwei, SHEN Peilin, DING Li, ZHANG Li, LV Yuhu, PAI Ziliang	2023	Crops	114.31	32.16	Hibiscus cannabinus L.	Dicotyledons	Malvaceae	Woody	Vigorous Growing Period	Preceding period	Plant height	0.2	Heavy stress	20d	Short-term coercion	3	3	65.63	4.36477	111.96	4.50333
10	186	ZHANG Lixia, GUO Xiayan, SHI Pengfei, NIE Liangpeng, LING Jingwei, SHEN Peilin, DING Li, ZHANG Li, LV Yuhu, PAI Ziliang	2023	Crops	114.31	32.16	Hibiscus cannabinus L.	Dicotyledons	Malvaceae	Woody	Vigorous Growing Period	Preceding period	Stem thickness	0.6	Medium stress	20d	Short-term coercion	3	3	9.11	0.762102	10.01	0.571577
10	187	ZHANG Lixia, GUO Xiayan, SHI Pengfei, NIE Liangpeng, LING Jingwei, SHEN Peilin, DING Li, ZHANG Li, LV Yuhu, PAI Ziliang	2023	Crops	114.31	32.16	Hibiscus cannabinus L.	Dicotyledons	Malvaceae	Woody	Vigorous Growing Period	Preceding period	Stem thickness	0.4	Heavy stress	20d	Short-term coercion	3	3	8.43	0.398372	10.01	0.571577
10	188	ZHANG Lixia, GUO Xiayan, SHI Pengfei, NIE Liangpeng, LING Jingwei, SHEN Peilin, DING Li, ZHANG Li, LV Yuhu, PAI Ziliang	2023	Crops	114.31	32.16	Hibiscus cannabinus L.	Dicotyledons	Malvaceae	Woody	Vigorous Growing Period	Preceding period	Stem thickness	0.2	Heavy stress	20d	Short-term coercion	3	3	6.4	0.415692	10.01	0.571577
10	189	ZHANG Lixia, GUO Xiayan, SHI Pengfei, NIE Liangpeng, LING Jingwei, SHEN Peilin, DING Li, ZHANG Li, LV Yuhu, PAI Ziliang	2023	Crops	114.31	32.16	Hibiscus cannabinus L.	Dicotyledons	Malvaceae	Woody	Vigorous Growing Period	Preceding period	Dry matter	0.6	Medium stress	20d	Short-term coercion	3	3	17.26	0.658179	19.43	5.95825
10	190	ZHANG Lixia, GUO Xiayan, SHI Pengfei, NIE Liangpeng, LING Jingwei, SHEN Peilin, DING Li, ZHANG Li, LV Yuhu, PAI Ziliang	2023	Crops	114.31	32.16	Hibiscus cannabinus L.	Dicotyledons	Malvaceae	Woody	Vigorous Growing Period	Preceding period	Dry matter	0.4	Heavy stress	20d	Short-term coercion	3	3	12.72	0.554256	19.43	5.95825
10	191	ZHANG Lixia, GUO Xiayan, SHI Pengfei, NIE Liangpeng, LING Jingwei, SHEN Peilin, DING Li, ZHANG Li, LV Yuhu, PAI Ziliang	2023	Crops	114.31	32.16	Hibiscus cannabinus L.	Dicotyledons	Malvaceae	Woody	Vigorous Growing Period	Preceding period	Dry matter	0.2	Heavy stress	20d	Short-term coercion	3	3	5.67	1.33368	19.43	5.95825
10	192	ZHANG Lixia, GUO Xiayan, SHI Pengfei, NIE Liangpeng, LING Jingwei, SHEN Peilin, DING Li, ZHANG Li, LV Yuhu, PAI Ziliang	2023	Crops	114.31	32.16	Hibiscus cannabinus L.	Dicotyledons	Malvaceae	Woody	Vigorous Growing Period	Preceding period	Yield	0.4	Heavy stress	20d	Short-term coercion	3	3	2507.9	259.634	3686.7	112.064
10	193	ZHANG Lixia, GUO Xiayan, SHI Pengfei, NIE Liangpeng, LING Jingwei, SHEN Peilin, DING Li, ZHANG Li, LV Yuhu, PAI Ziliang	2023	Crops	114.31	32.16	Hibiscus cannabinus L.	Dicotyledons	Malvaceae	Woody	Vigorous Growing Period	Preceding period	Yield	0.2	Heavy stress	20d	Short-term coercion	3	3	1953	310.73	3686.7	112.064
11	194	CHEN Xiaoyuan, LUO Yuanpei	2001	Scientia Agricultura Sinica	116.29	40.04	Triticum aestivum L.	Monocotyledon	Graminae	Herbaceous	Tillering stage	Preceding period	Yield	0.55	Medium stress	29d	Medium-term stress	3	3	5342.03	925.267	6520.33	1129.35
11	195	CHEN Xiaoyuan, LUO Yuanpei	2001	Scientia Agricultura Sinica	116.29	40.04	Triticum aestivum L.	Monocotyledon	Graminae	Herbaceous	Tillering stage	Preceding period	Yield	0.35	Heavy stress	29d	Medium-term stress	3	3	3130.02	542.135	6520.33	1129.35
11	196	CHEN Xiaoyuan, LUO Yuanpei	2001	Scientia Agricultura Sinica	116.29	40.04	Triticum aestivum L.	Monocotyledon	Graminae	Herbaceous	Jointing stage	Preceding period	Yield	0.55	Medium stress	36d	Medium-term stress	3	3	6086.3	1054.18	6520.33	1129.35
11	197	CHEN Xiaoyuan, LUO Yuanpei	2001	Scientia Agricultura Sinica	116.29	40.04	Triticum aestivum L.	Monocotyledon	Graminae	Herbaceous	Jointing stage	Preceding period	Yield	0.35	Heavy stress	36d	Medium-term stress	3	3	3195.02	553.394	6520.33	1129.35
11	198	CHEN Xiaoyuan, LUO Yuanpei	2001	Scientia Agricultura Sinica	116.29	40.04	Triticum aestivum L.	Monocotyledon	Graminae	Herbaceous	The flowering period	Mid period	Yield	0.55	Medium stress	57d	Long-term stress	3	3	5520.28	956.141	6520.33	1129.35
11	199	CHEN Xiaoyuan, LUO Yuanpei	2001	Scientia Agricultura Sinica	116.29	40.04	Triticum aestivum L.	Monocotyledon	Graminae	Herbaceous	The flowering period	Mid period	Yield	0.35	Heavy stress	57d	Long-term stress	3	3	2926.15	506.824	6520.33	1129.35
11	200	CHEN Xiaoyuan, LUO Yuanpei	2001	Scientia Agricultura Sinica	116.29	40.04	Triticum aestivum L.	Monocotyledon	Graminae	Herbaceous	Period of grouting	Mid period	Yield	0.55	Medium stress	64d	Long-term stress	3	3	5054.03	875.384	6520.33	1129.35
11	201	CHEN Xiaoyuan, LUO Yuanpei	2001	Scientia Agricultura Sinica	116.29	40.04	Triticum aestivum L.	Monocotyledon	Graminae	Herbaceous	Period of grouting	Mid period	Yield	0.35	Heavy stress	64d	Long-term stress	3	3	2605.01	451.201	6520.33	1129.35
12	202	CHEN Xiaoyuan, LUO Yuanpei	2001	Journal of China Agricultural University	116.29	40.04	Triticum aestivum L.	Monocotyledon	Graminae	Herbaceous	Tillering stage	Preceding period	WUE	0.55	Medium stress	29d	Medium-term stress	3	3	4534.7	785.433	6315.1	1093.81
12	203	CHEN Xiaoyuan, LUO Yuanpei	2001	Journal of China Agricultural University	116.29	40.04	Triticum aestivum L.	Monocotyledon	Graminae	Herbaceous	Jointing stage	Preceding period	WUE	0.55	Medium stress	36d	Medium-term stress	3	3	5855.6	1014.22	6315.1	1093.81
12	204	CHEN Xiaoyuan, LUO Yuanpei	2001	Journal of China Agricultural University	116.29	40.04	Triticum aestivum L.	Monocotyledon	Graminae	Herbaceous	The flowering period	Mid period	WUE	0.55	Medium stress	57d	Long-term stress	3	3	4305.5	745.734	6315.1	1093.81
12	205	CHEN Xiaoyuan, LUO Yuanpei	2001	Journal of China Agricultural University	116.29	40.04	Triticum aestivum L.	Monocotyledon	Graminae	Herbaceous	Period of grouting	Mid period	WUE	0.55	Medium stress	64d	Long-term stress	3	3	5608.7	971.455	6315.1	1093.81
13	206	LIU Sujun, MENG Meilian, CHEN Youjun, JIAO Ruizao	2018	Journal of Northwest A & F University(Natural Science Edition)	111.61	41.17	Solanum tuberosum L.	Dicotyledons	Solanaceae	Herbaceous	Tuber forming stage	Mid period	SPAD	0.4	Heavy stress	21d	Medium-term stress	4	4	17.1429	2.55319	48.8754	11.307
13	207	LIU Sujun, MENG Meilian, CHEN Youjun, JIAO Ruizao	2018	Journal of Northwest A & F University(Natural Science Edition)	111.61	41.17	Solanum tuberosum L.	Dicotyledons	Solanaceae	Herbaceous	Tuber forming stage	Mid period	SPAD	0.55	Medium stress	21d	Medium-term stress	4	4	20.4255	2.91793	48.8754	11.307
13	208	LIU Sujun, MENG Meilian, CHEN Youjun, JIAO Ruizao	2018	Journal of Northwest A & F University(Natural Science Edition)	111.61	41.17	Solanum tuberosum L.	Dicotyledons	Solanaceae	Herbaceous	Tuber forming stage	Mid period	Pn	0.4	Heavy stress	21d	Medium-term stress	4	4	9.9631	1.99262	26.2362	1.54982
13	209	LIU Sujun, MENG Meilian, CHEN Youjun, JIAO Ruizao	2018	Journal of Northwest A & F University(Natural Science Edition)	111.61	41.17	Solanum tuberosum L.	Dicotyledons	Solanaceae	Herbaceous	Tuber forming stage	Mid period	Pn	0.55	Medium stress	21d	Medium-term stress	4	4	12.6199	1.77122	26.2362	1.54982
13	210	LIU Sujun, MENG Meilian, CHEN Youjun, JIAO Ruizao	2018	Journal of Northwest A & F University(Natural Science Edition)	111.61	41.17	Solanum tuberosum L.	Dicotyledons	Solanaceae	Herbaceous	Tuber forming stage	Mid period	Tr	0.4	Heavy stress	21d	Medium-term stress	4	4	6.7037	1.11111	8.51852	0.666667
13	211	LIU Sujun, MENG Meilian, CHEN Youjun, JIAO Ruizao	2018	Journal of Northwest A & F University(Natural Science Edition)	111.61	41.17	Solanum tuberosum L.	Dicotyledons	Solanaceae	Herbaceous	Tuber forming stage	Mid period	Tr	0.55	Medium stress	21d	Medium-term stress	4	4	7.85185	1.11111	8.51852	0.666667
13	212	LIU Sujun, MENG Meilian, CHEN Youjun, JIAO Ruizao	2018	Journal of Northwest A & F University(Natural Science Edition)	111.61	41.17	Solanum tuberosum L.	Dicotyledons	Solanaceae	Herbaceous	Tuber forming stage	Mid period	Gs	0.4	Heavy stress	21d	Medium-term stress	4	4	0.235789	0.0449123	0.581053	0.0392982
13	213	LIU Sujun, MENG Meilian, CHEN Youjun, JIAO Ruizao	2018	Journal of Northwest A & F University(Natural Science Edition)	111.61	41.17	Solanum tuberosum L.	Dicotyledons	Solanaceae	Herbaceous	Tuber forming stage	Mid period	Gs	0.55	Medium stress	21d	Medium-term stress	4	4	0.359298	0.112281	0.581053	0.0392982
13	214	LIU Sujun, MENG Meilian, CHEN Youjun, JIAO Ruizao	2018	Journal of Northwest A & F University(Natural Science Edition)	111.61	41.17	Solanum tuberosum L.	Dicotyledons	Solanaceae	Herbaceous	Tuber forming stage	Mid period	Ci	0.4	Heavy stress	21d	Medium-term stress	4	4	187.148	17.6056	289.261	15.8451
13	215	LIU Sujun, MENG Meilian, CHEN Youjun, JIAO Ruizao	2018	Journal of Northwest A & F University(Natural Science Edition)	111.61	41.17	Solanum tuberosum L.	Dicotyledons	Solanaceae	Herbaceous	Tuber forming stage	Mid period	Ci	0.55	Medium stress	21d	Medium-term stress	4	4	206.514	63.3803	289.261	15.8451
13	216	LIU Sujun, MENG Meilian, CHEN Youjun, JIAO Ruizao	2018	Journal of Northwest A & F University(Natural Science Edition)	111.61	41.17	Solanum tuberosum L.	Dicotyledons	Solanaceae	Herbaceous	Tuber forming stage	Mid period	Yield	0.4	Heavy stress	21d	Medium-term stress	4	4	14419.8	4543.21	24296.3	14419.8
13	217	LIU Sujun, MENG Meilian, CHEN Youjun, JIAO Ruizao	2018	Journal of Northwest A & F University(Natural Science Edition)	111.61	41.17	Solanum tuberosum L.	Dicotyledons	Solanaceae	Herbaceous	Tuber forming stage	Mid period	Yield	0.55	Medium stress	21d	Medium-term stress	4	4	18666.7	1975.31	24296.3	14419.8
14	218	CAO Changlin, BAI Wenbin, ZHANG Jianhua, SHI Lijuan , PENG Zhidong, FAN Na, LI Guang, GUO Ruifeng, JIANG Baiyuang	2016	Chinese Agricultural Science Bulletin	112.73	37.69	Sorghum bicolor (L.) Moench	Monocotyledon	Graminae	Herbaceous	Seedling stage	Preceding period	Yield	0.6	Medium stress	10d	Short-term coercion	4	4	117.2	6.44	117	13.64
14	219	CAO Changlin, BAI Wenbin, ZHANG Jianhua, SHI Lijuan , PENG Zhidong, FAN Na, LI Guang, GUO Ruifeng, JIANG Baiyuang	2016	Chinese Agricultural Science Bulletin	112.73	37.69	Sorghum bicolor (L.) Moench	Monocotyledon	Graminae	Herbaceous	Seedling stage	Preceding period	Yield	0.6	Medium stress	15d	Short-term coercion	4	4	118.6	12.32	117	13.64
14	220	CAO Changlin, BAI Wenbin, ZHANG Jianhua, SHI Lijuan , PENG Zhidong, FAN Na, LI Guang, GUO Ruifeng, JIANG Baiyuang	2016	Chinese Agricultural Science Bulletin	112.73	37.69	Sorghum bicolor (L.) Moench	Monocotyledon	Graminae	Herbaceous	Seedling stage	Preceding period	Yield	0.6	Medium stress	20d	Short-term coercion	4	4	119	4.46	117	13.64
14	221	CAO Changlin, BAI Wenbin, ZHANG Jianhua, SHI Lijuan , PENG Zhidong, FAN Na, LI Guang, GUO Ruifeng, JIANG Baiyuang	2016	Chinese Agricultural Science Bulletin	112.73	37.69	Sorghum bicolor (L.) Moench	Monocotyledon	Graminae	Herbaceous	Seedling stage	Preceding period	Yield	0.5	Medium stress	10d	Short-term coercion	4	4	120.6	9.04	117	13.64
14	222	CAO Changlin, BAI Wenbin, ZHANG Jianhua, SHI Lijuan , PENG Zhidong, FAN Na, LI Guang, GUO Ruifeng, JIANG Baiyuang	2016	Chinese Agricultural Science Bulletin	112.73	37.69	Sorghum bicolor (L.) Moench	Monocotyledon	Graminae	Herbaceous	Seedling stage	Preceding period	Yield	0.5	Medium stress	15d	Short-term coercion	4	4	122.8	5.44	117	13.64
14	223	CAO Changlin, BAI Wenbin, ZHANG Jianhua, SHI Lijuan , PENG Zhidong, FAN Na, LI Guang, GUO Ruifeng, JIANG Baiyuang	2016	Chinese Agricultural Science Bulletin	112.73	37.69	Sorghum bicolor (L.) Moench	Monocotyledon	Graminae	Herbaceous	Seedling stage	Preceding period	Yield	0.5	Medium stress	20d	Short-term coercion	4	4	124	6.82	117	13.64
14	224	CAO Changlin, BAI Wenbin, ZHANG Jianhua, SHI Lijuan , PENG Zhidong, FAN Na, LI Guang, GUO Ruifeng, JIANG Baiyuang	2016	Chinese Agricultural Science Bulletin	112.73	37.69	Sorghum bicolor (L.) Moench	Monocotyledon	Graminae	Herbaceous	Seedling stage	Preceding period	Yield	0.4	Heavy stress	10d	Short-term coercion	4	4	125.4	3.62	117	13.64
14	225	CAO Changlin, BAI Wenbin, ZHANG Jianhua, SHI Lijuan , PENG Zhidong, FAN Na, LI Guang, GUO Ruifeng, JIANG Baiyuang	2016	Chinese Agricultural Science Bulletin	112.73	37.69	Sorghum bicolor (L.) Moench	Monocotyledon	Graminae	Herbaceous	Seedling stage	Preceding period	Yield	0.4	Heavy stress	15d	Short-term coercion	4	4	117.8	4.38	117	13.64
14	226	CAO Changlin, BAI Wenbin, ZHANG Jianhua, SHI Lijuan , PENG Zhidong, FAN Na, LI Guang, GUO Ruifeng, JIANG Baiyuang	2016	Chinese Agricultural Science Bulletin	112.73	37.69	Sorghum bicolor (L.) Moench	Monocotyledon	Graminae	Herbaceous	Seedling stage	Preceding period	Yield	0.4	Heavy stress	20d	Short-term coercion	4	4	114.8	10.46	117	13.64
14	227	CAO Changlin, BAI Wenbin, ZHANG Jianhua, SHI Lijuan , PENG Zhidong, FAN Na, LI Guang, GUO Ruifeng, JIANG Baiyuang	2016	Chinese Agricultural Science Bulletin	112.73	37.69	Sorghum bicolor (L.) Moench	Monocotyledon	Graminae	Herbaceous	Jointing stage	Preceding period	Yield	0.6	Medium stress	10d	Short-term coercion	4	4	104.27	3.94	103.93	6.26
14	228	CAO Changlin, BAI Wenbin, ZHANG Jianhua, SHI Lijuan , PENG Zhidong, FAN Na, LI Guang, GUO Ruifeng, JIANG Baiyuang	2016	Chinese Agricultural Science Bulletin	112.73	37.69	Sorghum bicolor (L.) Moench	Monocotyledon	Graminae	Herbaceous	Jointing stage	Preceding period	Yield	0.6	Medium stress	15d	Short-term coercion	4	4	103.87	4.82	103.93	6.26
14	229	CAO Changlin, BAI Wenbin, ZHANG Jianhua, SHI Lijuan , PENG Zhidong, FAN Na, LI Guang, GUO Ruifeng, JIANG Baiyuang	2016	Chinese Agricultural Science Bulletin	112.73	37.69	Sorghum bicolor (L.) Moench	Monocotyledon	Graminae	Herbaceous	Jointing stage	Preceding period	Yield	0.6	Medium stress	20d	Short-term coercion	4	4	102.73	5.54	103.93	6.26
14	230	CAO Changlin, BAI Wenbin, ZHANG Jianhua, SHI Lijuan , PENG Zhidong, FAN Na, LI Guang, GUO Ruifeng, JIANG Baiyuang	2016	Chinese Agricultural Science Bulletin	112.73	37.69	Sorghum bicolor (L.) Moench	Monocotyledon	Graminae	Herbaceous	Jointing stage	Preceding period	Yield	0.5	Medium stress	10d	Short-term coercion	4	4	98.33	8.48	103.93	6.26
14	231	CAO Changlin, BAI Wenbin, ZHANG Jianhua, SHI Lijuan , PENG Zhidong, FAN Na, LI Guang, GUO Ruifeng, JIANG Baiyuang	2016	Chinese Agricultural Science Bulletin	112.73	37.69	Sorghum bicolor (L.) Moench	Monocotyledon	Graminae	Herbaceous	Jointing stage	Preceding period	Yield	0.5	Medium stress	15d	Short-term coercion	4	4	96.2	18.36	103.93	6.26
14	232	CAO Changlin, BAI Wenbin, ZHANG Jianhua, SHI Lijuan , PENG Zhidong, FAN Na, LI Guang, GUO Ruifeng, JIANG Baiyuang	2016	Chinese Agricultural Science Bulletin	112.73	37.69	Sorghum bicolor (L.) Moench	Monocotyledon	Graminae	Herbaceous	Jointing stage	Preceding period	Yield	0.5	Medium stress	20d	Short-term coercion	4	4	94.8	2.88	103.93	6.26
14	233	CAO Changlin, BAI Wenbin, ZHANG Jianhua, SHI Lijuan , PENG Zhidong, FAN Na, LI Guang, GUO Ruifeng, JIANG Baiyuang	2016	Chinese Agricultural Science Bulletin	112.73	37.69	Sorghum bicolor (L.) Moench	Monocotyledon	Graminae	Herbaceous	Jointing stage	Preceding period	Yield	0.4	Heavy stress	10d	Short-term coercion	4	4	98.27	3.02	103.93	6.26
14	234	CAO Changlin, BAI Wenbin, ZHANG Jianhua, SHI Lijuan , PENG Zhidong, FAN Na, LI Guang, GUO Ruifeng, JIANG Baiyuang	2016	Chinese Agricultural Science Bulletin	112.73	37.69	Sorghum bicolor (L.) Moench	Monocotyledon	Graminae	Herbaceous	Jointing stage	Preceding period	Yield	0.4	Heavy stress	15d	Short-term coercion	4	4	82.13	10.84	103.93	6.26
14	235	CAO Changlin, BAI Wenbin, ZHANG Jianhua, SHI Lijuan , PENG Zhidong, FAN Na, LI Guang, GUO Ruifeng, JIANG Baiyuang	2016	Chinese Agricultural Science Bulletin	112.73	37.69	Sorghum bicolor (L.) Moench	Monocotyledon	Graminae	Herbaceous	Jointing stage	Preceding period	Yield	0.4	Heavy stress	20d	Short-term coercion	4	4	80.6	6.82	103.93	6.26
14	236	CAO Changlin, BAI Wenbin, ZHANG Jianhua, SHI Lijuan , PENG Zhidong, FAN Na, LI Guang, GUO Ruifeng, JIANG Baiyuang	2016	Chinese Agricultural Science Bulletin	112.73	37.69	Sorghum bicolor (L.) Moench	Monocotyledon	Graminae	Herbaceous	Period of grouting	Mid period	Yield	0.6	Medium stress	10d	Short-term coercion	4	4	83.6	2.16	82.9	4.64
14	237	CAO Changlin, BAI Wenbin, ZHANG Jianhua, SHI Lijuan , PENG Zhidong, FAN Na, LI Guang, GUO Ruifeng, JIANG Baiyuang	2016	Chinese Agricultural Science Bulletin	112.73	37.69	Sorghum bicolor (L.) Moench	Monocotyledon	Graminae	Herbaceous	Period of grouting	Mid period	Yield	0.6	Medium stress	15d	Short-term coercion	4	4	83.2	2.36	82.9	4.64
14	238	CAO Changlin, BAI Wenbin, ZHANG Jianhua, SHI Lijuan , PENG Zhidong, FAN Na, LI Guang, GUO Ruifeng, JIANG Baiyuang	2016	Chinese Agricultural Science Bulletin	112.73	37.69	Sorghum bicolor (L.) Moench	Monocotyledon	Graminae	Herbaceous	Period of grouting	Mid period	Yield	0.6	Medium stress	20d	Short-term coercion	4	4	82.7	2.06	82.9	4.64
14	239	CAO Changlin, BAI Wenbin, ZHANG Jianhua, SHI Lijuan , PENG Zhidong, FAN Na, LI Guang, GUO Ruifeng, JIANG Baiyuang	2016	Chinese Agricultural Science Bulletin	112.73	37.69	Sorghum bicolor (L.) Moench	Monocotyledon	Graminae	Herbaceous	Period of grouting	Mid period	Yield	0.5	Medium stress	10d	Short-term coercion	4	4	82.3	0.72	82.9	4.64
14	240	CAO Changlin, BAI Wenbin, ZHANG Jianhua, SHI Lijuan , PENG Zhidong, FAN Na, LI Guang, GUO Ruifeng, JIANG Baiyuang	2016	Chinese Agricultural Science Bulletin	112.73	37.69	Sorghum bicolor (L.) Moench	Monocotyledon	Graminae	Herbaceous	Period of grouting	Mid period	Yield	0.5	Medium stress	15d	Short-term coercion	4	4	82	3.82	82.9	4.64
14	241	CAO Changlin, BAI Wenbin, ZHANG Jianhua, SHI Lijuan , PENG Zhidong, FAN Na, LI Guang, GUO Ruifeng, JIANG Baiyuang	2016	Chinese Agricultural Science Bulletin	112.73	37.69	Sorghum bicolor (L.) Moench	Monocotyledon	Graminae	Herbaceous	Period of grouting	Mid period	Yield	0.5	Medium stress	20d	Short-term coercion	4	4	80.9	5.4	82.9	4.64
14	242	CAO Changlin, BAI Wenbin, ZHANG Jianhua, SHI Lijuan , PENG Zhidong, FAN Na, LI Guang, GUO Ruifeng, JIANG Baiyuang	2016	Chinese Agricultural Science Bulletin	112.73	37.69	Sorghum bicolor (L.) Moench	Monocotyledon	Graminae	Herbaceous	Period of grouting	Mid period	Yield	0.4	Heavy stress	10d	Short-term coercion	4	4	70.3	0.88	82.9	4.64
14	243	CAO Changlin, BAI Wenbin, ZHANG Jianhua, SHI Lijuan , PENG Zhidong, FAN Na, LI Guang, GUO Ruifeng, JIANG Baiyuang	2016	Chinese Agricultural Science Bulletin	112.73	37.69	Sorghum bicolor (L.) Moench	Monocotyledon	Graminae	Herbaceous	Period of grouting	Mid period	Yield	0.4	Heavy stress	15d	Short-term coercion	4	4	69.9	3.86	82.9	4.64
14	244	CAO Changlin, BAI Wenbin, ZHANG Jianhua, SHI Lijuan , PENG Zhidong, FAN Na, LI Guang, GUO Ruifeng, JIANG Baiyuang	2016	Chinese Agricultural Science Bulletin	112.73	37.69	Sorghum bicolor (L.) Moench	Monocotyledon	Graminae	Herbaceous	Period of grouting	Mid period	Yield	0.4	Heavy stress	20d	Short-term coercion	4	4	69.5	2.6	82.9	4.64
14	245	CAO Changlin, BAI Wenbin, ZHANG Jianhua, SHI Lijuan , PENG Zhidong, FAN Na, LI Guang, GUO Ruifeng, JIANG Baiyuang	2016	Chinese Agricultural Science Bulletin	112.73	37.69	Sorghum bicolor (L.) Moench	Monocotyledon	Graminae	Herbaceous	Seedling stage	Preceding period	Pn	0.6	Medium stress	10d	Short-term coercion	4	4	14.2529	2.85057	15.6322	3.12644
14	246	CAO Changlin, BAI Wenbin, ZHANG Jianhua, SHI Lijuan , PENG Zhidong, FAN Na, LI Guang, GUO Ruifeng, JIANG Baiyuang	2016	Chinese Agricultural Science Bulletin	112.73	37.69	Sorghum bicolor (L.) Moench	Monocotyledon	Graminae	Herbaceous	Seedling stage	Preceding period	Pn	0.6	Medium stress	15d	Short-term coercion	4	4	15.9645	3.1929	12.7494	2.54989
14	247	CAO Changlin, BAI Wenbin, ZHANG Jianhua, SHI Lijuan , PENG Zhidong, FAN Na, LI Guang, GUO Ruifeng, JIANG Baiyuang	2016	Chinese Agricultural Science Bulletin	112.73	37.69	Sorghum bicolor (L.) Moench	Monocotyledon	Graminae	Herbaceous	Seedling stage	Preceding period	Pn	0.6	Medium stress	20d	Short-term coercion	4	4	24.9395	4.98789	25.4237	5.08475
14	248	CAO Changlin, BAI Wenbin, ZHANG Jianhua, SHI Lijuan , PENG Zhidong, FAN Na, LI Guang, GUO Ruifeng, JIANG Baiyuang	2016	Chinese Agricultural Science Bulletin	112.73	37.69	Sorghum bicolor (L.) Moench	Monocotyledon	Graminae	Herbaceous	Seedling stage	Preceding period	Pn	0.5	Medium stress	10d	Short-term coercion	4	4	14.8276	2.96552	15.6322	3.12644
14	249	CAO Changlin, BAI Wenbin, ZHANG Jianhua, SHI Lijuan , PENG Zhidong, FAN Na, LI Guang, GUO Ruifeng, JIANG Baiyuang	2016	Chinese Agricultural Science Bulletin	112.73	37.69	Sorghum bicolor (L.) Moench	Monocotyledon	Graminae	Herbaceous	Seedling stage	Preceding period	Pn	0.5	Medium stress	15d	Short-term coercion	4	4	17.6275	3.5255	12.7494	2.54989
14	250	CAO Changlin, BAI Wenbin, ZHANG Jianhua, SHI Lijuan , PENG Zhidong, FAN Na, LI Guang, GUO Ruifeng, JIANG Baiyuang	2016	Chinese Agricultural Science Bulletin	112.73	37.69	Sorghum bicolor (L.) Moench	Monocotyledon	Graminae	Herbaceous	Seedling stage	Preceding period	Pn	0.5	Medium stress	20d	Short-term coercion	4	4	26.2712	5.25424	25.4237	5.08475
14	251	CAO Changlin, BAI Wenbin, ZHANG Jianhua, SHI Lijuan , PENG Zhidong, FAN Na, LI Guang, GUO Ruifeng, JIANG Baiyuang	2016	Chinese Agricultural Science Bulletin	112.73	37.69	Sorghum bicolor (L.) Moench	Monocotyledon	Graminae	Herbaceous	Seedling stage	Preceding period	Pn	0.4	Heavy stress	10d	Short-term coercion	4	4	17.8161	3.56322	15.6322	3.12644
14	252	CAO Changlin, BAI Wenbin, ZHANG Jianhua, SHI Lijuan , PENG Zhidong, FAN Na, LI Guang, GUO Ruifeng, JIANG Baiyuang	2016	Chinese Agricultural Science Bulletin	112.73	37.69	Sorghum bicolor (L.) Moench	Monocotyledon	Graminae	Herbaceous	Seedling stage	Preceding period	Pn	0.4	Heavy stress	15d	Short-term coercion	4	4	16.7406	3.34812	12.7494	2.54989
14	253	CAO Changlin, BAI Wenbin, ZHANG Jianhua, SHI Lijuan , PENG Zhidong, FAN Na, LI Guang, GUO Ruifeng, JIANG Baiyuang	2016	Chinese Agricultural Science Bulletin	112.73	37.69	Sorghum bicolor (L.) Moench	Monocotyledon	Graminae	Herbaceous	Seedling stage	Preceding period	Pn	0.4	Heavy stress	20d	Short-term coercion	4	4	28.3293	5.66586	25.4237	5.08475
14	254	CAO Changlin, BAI Wenbin, ZHANG Jianhua, SHI Lijuan , PENG Zhidong, FAN Na, LI Guang, GUO Ruifeng, JIANG Baiyuang	2016	Chinese Agricultural Science Bulletin	112.73	37.69	Sorghum bicolor (L.) Moench	Monocotyledon	Graminae	Herbaceous	Jointing stage	Preceding period	Pn	0.6	Medium stress	10d	Short-term coercion	4	4	21.4876	4.29752	17.7686	3.55372
14	255	CAO Changlin, BAI Wenbin, ZHANG Jianhua, SHI Lijuan , PENG Zhidong, FAN Na, LI Guang, GUO Ruifeng, JIANG Baiyuang	2016	Chinese Agricultural Science Bulletin	112.73	37.69	Sorghum bicolor (L.) Moench	Monocotyledon	Graminae	Herbaceous	Jointing stage	Preceding period	Pn	0.6	Medium stress	15d	Short-term coercion	4	4	21.5935	4.31871	26.2125	5.24249
14	256	CAO Changlin, BAI Wenbin, ZHANG Jianhua, SHI Lijuan , PENG Zhidong, FAN Na, LI Guang, GUO Ruifeng, JIANG Baiyuang	2016	Chinese Agricultural Science Bulletin	112.73	37.69	Sorghum bicolor (L.) Moench	Monocotyledon	Graminae	Herbaceous	Jointing stage	Preceding period	Pn	0.6	Medium stress	20d	Short-term coercion	4	4	17.7003	3.54005	16.0207	3.20413
14	257	CAO Changlin, BAI Wenbin, ZHANG Jianhua, SHI Lijuan , PENG Zhidong, FAN Na, LI Guang, GUO Ruifeng, JIANG Baiyuang	2016	Chinese Agricultural Science Bulletin	112.73	37.69	Sorghum bicolor (L.) Moench	Monocotyledon	Graminae	Herbaceous	Jointing stage	Preceding period	Pn	0.5	Medium stress	10d	Short-term coercion	4	4	22.7273	4.54545	17.7686	3.55372
14	258	CAO Changlin, BAI Wenbin, ZHANG Jianhua, SHI Lijuan , PENG Zhidong, FAN Na, LI Guang, GUO Ruifeng, JIANG Baiyuang	2016	Chinese Agricultural Science Bulletin	112.73	37.69	Sorghum bicolor (L.) Moench	Monocotyledon	Graminae	Herbaceous	Jointing stage	Preceding period	Pn	0.5	Medium stress	15d	Short-term coercion	4	4	19.3995	3.87991	26.2125	5.24249
14	259	CAO Changlin, BAI Wenbin, ZHANG Jianhua, SHI Lijuan , PENG Zhidong, FAN Na, LI Guang, GUO Ruifeng, JIANG Baiyuang	2016	Chinese Agricultural Science Bulletin	112.73	37.69	Sorghum bicolor (L.) Moench	Monocotyledon	Graminae	Herbaceous	Jointing stage	Preceding period	Pn	0.5	Medium stress	20d	Short-term coercion	4	4	20.4134	4.08269	16.0207	3.20413
14	260	CAO Changlin, BAI Wenbin, ZHANG Jianhua, SHI Lijuan , PENG Zhidong, FAN Na, LI Guang, GUO Ruifeng, JIANG Baiyuang	2016	Chinese Agricultural Science Bulletin	112.73	37.69	Sorghum bicolor (L.) Moench	Monocotyledon	Graminae	Herbaceous	Jointing stage	Preceding period	Pn	0.4	Heavy stress	10d	Short-term coercion	4	4	24.1736	4.83471	17.7686	3.55372
14	261	CAO Changlin, BAI Wenbin, ZHANG Jianhua, SHI Lijuan , PENG Zhidong, FAN Na, LI Guang, GUO Ruifeng, JIANG Baiyuang	2016	Chinese Agricultural Science Bulletin	112.73	37.69	Sorghum bicolor (L.) Moench	Monocotyledon	Graminae	Herbaceous	Jointing stage	Preceding period	Pn	0.4	Heavy stress	15d	Short-term coercion	4	4	18.0139	3.60277	26.2125	5.24249
14	262	CAO Changlin, BAI Wenbin, ZHANG Jianhua, SHI Lijuan , PENG Zhidong, FAN Na, LI Guang, GUO Ruifeng, JIANG Baiyuang	2016	Chinese Agricultural Science Bulletin	112.73	37.69	Sorghum bicolor (L.) Moench	Monocotyledon	Graminae	Herbaceous	Jointing stage	Preceding period	Pn	0.4	Heavy stress	20d	Short-term coercion	4	4	14.9871	2.99742	16.0207	3.20413
15	263	LI Mingda, ZHANG Hongping	2016	Journal of Desert Research	103.71	36.1	Pisum sativum L.	Dicotyledons	Leguminosae	Herbaceous	Seedling stage	Preceding period	Dry matter	0.45	Heavy stress	10d	Short-term coercion	12	12	1.0275	0.355936	1.065	0.368927
15	264	LI Mingda, ZHANG Hongping	2016	Journal of Desert Research	103.71	36.1	Pisum sativum L.	Dicotyledons	Leguminosae	Herbaceous	Seedling stage	Preceding period	Dry matter	0.6	Medium stress	20d	Short-term coercion	12	12	1.2613	0.436927	1.3116	0.454352
15	265	LI Mingda, ZHANG Hongping	2016	Journal of Desert Research	103.71	36.1	Pisum sativum L.	Dicotyledons	Leguminosae	Herbaceous	Seedling stage	Preceding period	Dry matter	0.45	Heavy stress	20d	Short-term coercion	12	12	1.2144	0.420681	2.3116	0.800762
15	266	LI Mingda, ZHANG Hongping	2016	Journal of Desert Research	103.71	36.1	Pisum sativum L.	Dicotyledons	Leguminosae	Herbaceous	The flowering period	Mid period	Dry matter	0.6	Medium stress	10d	Short-term coercion	12	12	3.8453	1.33205	3.9429	1.36586
15	267	LI Mingda, ZHANG Hongping	2016	Journal of Desert Research	103.71	36.1	Pisum sativum L.	Dicotyledons	Leguminosae	Herbaceous	The flowering period	Mid period	Dry matter	0.45	Heavy stress	10d	Short-term coercion	12	12	3.6009	1.24739	3.9429	1.36586
15	268	LI Mingda, ZHANG Hongping	2016	Journal of Desert Research	103.71	36.1	Pisum sativum L.	Dicotyledons	Leguminosae	Herbaceous	The flowering period	Mid period	Dry matter	0.6	Medium stress	20d	Short-term coercion	12	12	5.1917	1.79846	5.825	2.01784
15	269	LI Mingda, ZHANG Hongping	2016	Journal of Desert Research	103.71	36.1	Pisum sativum L.	Dicotyledons	Leguminosae	Herbaceous	The flowering period	Mid period	Dry matter	0.45	Heavy stress	20d	Short-term coercion	12	12	4.8907	1.69419	5.825	2.01784
15	270	LI Mingda, ZHANG Hongping	2016	Journal of Desert Research	103.71	36.1	Pisum sativum L.	Dicotyledons	Leguminosae	Herbaceous	Filling period	Mid period	Dry matter	0.6	Medium stress	10d	Short-term coercion	12	12	7.4576	2.58339	7.9305	2.74721
15	271	LI Mingda, ZHANG Hongping	2016	Journal of Desert Research	103.71	36.1	Pisum sativum L.	Dicotyledons	Leguminosae	Herbaceous	Filling period	Mid period	Dry matter	0.45	Heavy stress	10d	Short-term coercion	12	12	6.9701	2.41451	7.9305	2.74721
15	272	LI Mingda, ZHANG Hongping	2016	Journal of Desert Research	103.71	36.1	Pisum sativum L.	Dicotyledons	Leguminosae	Herbaceous	Filling period	Mid period	Dry matter	0.6	Medium stress	20d	Short-term coercion	12	12	7.0459	2.44077	7.9405	2.75067
15	273	LI Mingda, ZHANG Hongping	2016	Journal of Desert Research	103.71	36.1	Pisum sativum L.	Dicotyledons	Leguminosae	Herbaceous	Filling period	Mid period	Dry matter	0.45	Heavy stress	20d	Short-term coercion	12	12	6.1992	2.14747	7.9405	2.75067
15	274	LI Mingda, ZHANG Hongping	2016	Journal of Desert Research	103.71	36.1	Pisum sativum L.	Dicotyledons	Leguminosae	Herbaceous	Seedling stage	Preceding period	Yield	0.6	Medium stress	10d	Short-term coercion	12	12	4.8061	1.66488	4.6123	1.59775
15	275	LI Mingda, ZHANG Hongping	2016	Journal of Desert Research	103.71	36.1	Pisum sativum L.	Dicotyledons	Leguminosae	Herbaceous	Seedling stage	Preceding period	Yield	0.45	Heavy stress	10d	Short-term coercion	12	12	4.031	1.39638	4.6123	1.59775
15	276	LI Mingda, ZHANG Hongping	2016	Journal of Desert Research	103.71	36.1	Pisum sativum L.	Dicotyledons	Leguminosae	Herbaceous	Seedling stage	Preceding period	Yield	0.6	Medium stress	20d	Short-term coercion	12	12	4.2259	1.46389	4.6134	1.59813
15	277	LI Mingda, ZHANG Hongping	2016	Journal of Desert Research	103.71	36.1	Pisum sativum L.	Dicotyledons	Leguminosae	Herbaceous	Seedling stage	Preceding period	Yield	0.45	Heavy stress	20d	Short-term coercion	12	12	3.796	1.31497	4.6134	1.59813
15	278	LI Mingda, ZHANG Hongping	2016	Journal of Desert Research	103.71	36.1	Pisum sativum L.	Dicotyledons	Leguminosae	Herbaceous	The flowering period	Mid period	Yield	0.6	Medium stress	10d	Short-term coercion	12	12	4.2109	1.4587	4.7568	1.6478
15	279	LI Mingda, ZHANG Hongping	2016	Journal of Desert Research	103.71	36.1	Pisum sativum L.	Dicotyledons	Leguminosae	Herbaceous	The flowering period	Mid period	Yield	0.45	Heavy stress	10d	Short-term coercion	12	12	3.2601	1.12933	4.7568	1.6478
15	280	LI Mingda, ZHANG Hongping	2016	Journal of Desert Research	103.71	36.1	Pisum sativum L.	Dicotyledons	Leguminosae	Herbaceous	The flowering period	Mid period	Yield	0.6	Medium stress	20d	Short-term coercion	12	12	3.2549	1.12753	4.7268	1.63741
15	281	LI Mingda, ZHANG Hongping	2016	Journal of Desert Research	103.71	36.1	Pisum sativum L.	Dicotyledons	Leguminosae	Herbaceous	The flowering period	Mid period	Yield	0.45	Heavy stress	20d	Short-term coercion	12	12	2.5577	0.886013	4.7268	1.63741
15	282	LI Mingda, ZHANG Hongping	2016	Journal of Desert Research	103.71	36.1	Pisum sativum L.	Dicotyledons	Leguminosae	Herbaceous	Filling period	Mid period	Yield	0.6	Medium stress	10d	Short-term coercion	12	12	4.3105	1.4932	4.5639	1.58098
15	283	LI Mingda, ZHANG Hongping	2016	Journal of Desert Research	103.71	36.1	Pisum sativum L.	Dicotyledons	Leguminosae	Herbaceous	Filling period	Mid period	Yield	0.45	Heavy stress	10d	Short-term coercion	12	12	3.9466	1.36714	4.5639	1.58098
15	284	LI Mingda, ZHANG Hongping	2016	Journal of Desert Research	103.71	36.1	Pisum sativum L.	Dicotyledons	Leguminosae	Herbaceous	Filling period	Mid period	Yield	0.6	Medium stress	20d	Short-term coercion	12	12	4.0952	1.41862	4.6541	1.61223
15	285	LI Mingda, ZHANG Hongping	2016	Journal of Desert Research	103.71	36.1	Pisum sativum L.	Dicotyledons	Leguminosae	Herbaceous	Filling period	Mid period	Yield	0.45	Heavy stress	20d	Short-term coercion	12	12	3.8007	1.3166	4.6541	1.61223
16	286	HU Mengmeng, ZHANG Jizong, ZHANG Lifeng, LIU Yuhua, HUANG Pengjian	2021	Agricultural Ｒesearch in the Arid Areas	114.87	41.19	Solanum tuberosum L.	Dicotyledons	Solanaceae	Herbaceous	Seedling stage	Preceding period	Yield	0.55	Medium stress	20d	Short-term coercion	3	3	0.41	0.0710141	0.58	0.100459
16	287	HU Mengmeng, ZHANG Jizong, ZHANG Lifeng, LIU Yuhua, HUANG Pengjian	2021	Agricultural Ｒesearch in the Arid Areas	114.87	41.19	Solanum tuberosum L.	Dicotyledons	Solanaceae	Herbaceous	Tuber forming stage	Mid period	Yield	0.55	Medium stress	20d	Short-term coercion	3	3	0.43	0.0744782	0.58	0.100459
16	288	HU Mengmeng, ZHANG Jizong, ZHANG Lifeng, LIU Yuhua, HUANG Pengjian	2021	Agricultural Ｒesearch in the Arid Areas	114.87	41.19	Solanum tuberosum L.	Dicotyledons	Solanaceae	Herbaceous	Tuber expansion stage	Later period	Yield	0.55	Medium stress	20d	Short-term coercion	3	3	0.4	0.069282	0.58	0.100459
16	289	HU Mengmeng, ZHANG Jizong, ZHANG Lifeng, LIU Yuhua, HUANG Pengjian	2021	Agricultural Ｒesearch in the Arid Areas	114.87	41.19	Solanum tuberosum L.	Dicotyledons	Solanaceae	Herbaceous	Starch accumulation period	Later period	Yield	0.55	Medium stress	20d	Short-term coercion	3	3	0.48	0.0831384	0.58	0.100459
16	290	HU Mengmeng, ZHANG Jizong, ZHANG Lifeng, LIU Yuhua, HUANG Pengjian	2021	Agricultural Ｒesearch in the Arid Areas	114.87	41.19	Solanum tuberosum L.	Dicotyledons	Solanaceae	Herbaceous	Seedling stage	Preceding period	WUE	0.55	Medium stress	20d	Short-term coercion	3	3	18.42	3.19044	21.87	3.788
16	291	HU Mengmeng, ZHANG Jizong, ZHANG Lifeng, LIU Yuhua, HUANG Pengjian	2021	Agricultural Ｒesearch in the Arid Areas	114.87	41.19	Solanum tuberosum L.	Dicotyledons	Solanaceae	Herbaceous	Tuber forming stage	Mid period	WUE	0.55	Medium stress	20d	Short-term coercion	3	3	15.19	2.63099	22.87	3.9612
16	292	HU Mengmeng, ZHANG Jizong, ZHANG Lifeng, LIU Yuhua, HUANG Pengjian	2021	Agricultural Ｒesearch in the Arid Areas	114.87	41.19	Solanum tuberosum L.	Dicotyledons	Solanaceae	Herbaceous	Tuber expansion stage	Later period	WUE	0.55	Medium stress	20d	Short-term coercion	3	3	19.72	3.4156	23.87	4.13441
16	293	HU Mengmeng, ZHANG Jizong, ZHANG Lifeng, LIU Yuhua, HUANG Pengjian	2021	Agricultural Ｒesearch in the Arid Areas	114.87	41.19	Solanum tuberosum L.	Dicotyledons	Solanaceae	Herbaceous	Starch accumulation period	Later period	WUE	0.55	Medium stress	20d	Short-term coercion	3	3	21	3.63731	24.87	4.30761
16	294	HU Mengmeng, ZHANG Jizong, ZHANG Lifeng, LIU Yuhua, HUANG Pengjian	2021	Agricultural Ｒesearch in the Arid Areas	114.87	41.19	Solanum tuberosum L.	Dicotyledons	Solanaceae	Herbaceous	Seedling stage	Preceding period	SPAD	0.55	Medium stress	20d	Short-term coercion	3	3	35.6068	6.16728	34.0049	5.88981
16	295	HU Mengmeng, ZHANG Jizong, ZHANG Lifeng, LIU Yuhua, HUANG Pengjian	2021	Agricultural Ｒesearch in the Arid Areas	114.87	41.19	Solanum tuberosum L.	Dicotyledons	Solanaceae	Herbaceous	Tuber forming stage	Mid period	SPAD	0.55	Medium stress	20d	Short-term coercion	3	3	42.5243	7.36542	35.0049	6.06302
16	296	HU Mengmeng, ZHANG Jizong, ZHANG Lifeng, LIU Yuhua, HUANG Pengjian	2021	Agricultural Ｒesearch in the Arid Areas	114.87	41.19	Solanum tuberosum L.	Dicotyledons	Solanaceae	Herbaceous	Tuber expansion stage	Later period	SPAD	0.55	Medium stress	20d	Short-term coercion	3	3	39.3204	6.81049	36.0049	6.23622
16	297	HU Mengmeng, ZHANG Jizong, ZHANG Lifeng, LIU Yuhua, HUANG Pengjian	2021	Agricultural Ｒesearch in the Arid Areas	114.87	41.19	Solanum tuberosum L.	Dicotyledons	Solanaceae	Herbaceous	Starch accumulation period	Later period	SPAD	0.55	Medium stress	20d	Short-term coercion	3	3	32.6942	5.6628	37.0049	6.40943
17	298	WANG Shijie, ZHANG Hengjia, YANG Xiaoting, WANG Yucai, XUE Daoxin	2017	Acta Agriculturae Boreali-Sinica	100.8	38.61	Capsicum annuum L.	Dicotyledons	Solanaceae	Woody	Seedling stage	Preceding period	Plant height	0.65	Medium stress	29d	Medium-term stress	3	3	51.37	8.89754	54.73	9.47951
17	299	WANG Shijie, ZHANG Hengjia, YANG Xiaoting, WANG Yucai, XUE Daoxin	2017	Acta Agriculturae Boreali-Sinica	100.8	38.61	Capsicum annuum L.	Dicotyledons	Solanaceae	Woody	Seedling stage	Preceding period	Plant height	0.55	Medium stress	29d	Medium-term stress	3	3	44.9	7.77691	54.73	9.47951
17	300	WANG Shijie, ZHANG Hengjia, YANG Xiaoting, WANG Yucai, XUE Daoxin	2017	Acta Agriculturae Boreali-Sinica	100.8	38.61	Capsicum annuum L.	Dicotyledons	Solanaceae	Woody	Seedling stage	Preceding period	Plant height	0.45	Heavy stress	29d	Medium-term stress	3	3	33.8	5.85433	54.73	9.47951
17	301	WANG Shijie, ZHANG Hengjia, YANG Xiaoting, WANG Yucai, XUE Daoxin	2017	Acta Agriculturae Boreali-Sinica	100.8	38.61	Capsicum annuum L.	Dicotyledons	Solanaceae	Woody	The flowering period	Mid period	Plant height	0.65	Medium stress	25d	Medium-term stress	3	3	48.1	8.33116	54.73	9.47951
17	302	WANG Shijie, ZHANG Hengjia, YANG Xiaoting, WANG Yucai, XUE Daoxin	2017	Acta Agriculturae Boreali-Sinica	100.8	38.61	Capsicum annuum L.	Dicotyledons	Solanaceae	Woody	The flowering period	Mid period	Plant height	0.55	Medium stress	25d	Medium-term stress	3	3	44.37	7.68511	54.73	9.47951
17	303	WANG Shijie, ZHANG Hengjia, YANG Xiaoting, WANG Yucai, XUE Daoxin	2017	Acta Agriculturae Boreali-Sinica	100.8	38.61	Capsicum annuum L.	Dicotyledons	Solanaceae	Woody	The flowering period	Mid period	Plant height	0.45	Heavy stress	25d	Medium-term stress	3	3	33.37	5.77985	54.73	9.47951
17	304	WANG Shijie, ZHANG Hengjia, YANG Xiaoting, WANG Yucai, XUE Daoxin	2017	Acta Agriculturae Boreali-Sinica	100.8	38.61	Capsicum annuum L.	Dicotyledons	Solanaceae	Woody	Seedling stage	Preceding period	Stem thickness	0.65	Medium stress	29d	Medium-term stress	3	3	15.25	2.64138	16.06	2.78167
17	305	WANG Shijie, ZHANG Hengjia, YANG Xiaoting, WANG Yucai, XUE Daoxin	2017	Acta Agriculturae Boreali-Sinica	100.8	38.61	Capsicum annuum L.	Dicotyledons	Solanaceae	Woody	Seedling stage	Preceding period	Stem thickness	0.55	Medium stress	29d	Medium-term stress	3	3	14.6	2.52879	16.06	2.78167
17	306	WANG Shijie, ZHANG Hengjia, YANG Xiaoting, WANG Yucai, XUE Daoxin	2017	Acta Agriculturae Boreali-Sinica	100.8	38.61	Capsicum annuum L.	Dicotyledons	Solanaceae	Woody	Seedling stage	Preceding period	Stem thickness	0.45	Heavy stress	29d	Medium-term stress	3	3	12.59	2.18065	16.06	2.78167
17	307	WANG Shijie, ZHANG Hengjia, YANG Xiaoting, WANG Yucai, XUE Daoxin	2017	Acta Agriculturae Boreali-Sinica	100.8	38.61	Capsicum annuum L.	Dicotyledons	Solanaceae	Woody	The flowering period	Mid period	Stem thickness	0.65	Medium stress	25d	Medium-term stress	3	3	13.24	2.29324	16.06	2.78167
17	308	WANG Shijie, ZHANG Hengjia, YANG Xiaoting, WANG Yucai, XUE Daoxin	2017	Acta Agriculturae Boreali-Sinica	100.8	38.61	Capsicum annuum L.	Dicotyledons	Solanaceae	Woody	The flowering period	Mid period	Stem thickness	0.55	Medium stress	25d	Medium-term stress	3	3	12.62	2.18585	16.06	2.78167
17	309	WANG Shijie, ZHANG Hengjia, YANG Xiaoting, WANG Yucai, XUE Daoxin	2017	Acta Agriculturae Boreali-Sinica	100.8	38.61	Capsicum annuum L.	Dicotyledons	Solanaceae	Woody	The flowering period	Mid period	Stem thickness	0.45	Heavy stress	25d	Medium-term stress	3	3	10.77	1.86542	16.06	2.78167
17	310	WANG Shijie, ZHANG Hengjia, YANG Xiaoting, WANG Yucai, XUE Daoxin	2017	Acta Agriculturae Boreali-Sinica	100.8	38.61	Capsicum annuum L.	Dicotyledons	Solanaceae	Woody	Seedling stage	Preceding period	Dry matter	0.65	Medium stress	29d	Medium-term stress	3	3	98.46	17.0538	99.4	17.2166
17	311	WANG Shijie, ZHANG Hengjia, YANG Xiaoting, WANG Yucai, XUE Daoxin	2017	Acta Agriculturae Boreali-Sinica	100.8	38.61	Capsicum annuum L.	Dicotyledons	Solanaceae	Woody	Seedling stage	Preceding period	Dry matter	0.55	Medium stress	29d	Medium-term stress	3	3	93.52	16.1981	99.4	17.2166
17	312	WANG Shijie, ZHANG Hengjia, YANG Xiaoting, WANG Yucai, XUE Daoxin	2017	Acta Agriculturae Boreali-Sinica	100.8	38.61	Capsicum annuum L.	Dicotyledons	Solanaceae	Woody	Seedling stage	Preceding period	Dry matter	0.45	Heavy stress	29d	Medium-term stress	3	3	79.27	13.73	99.4	17.2166
17	313	WANG Shijie, ZHANG Hengjia, YANG Xiaoting, WANG Yucai, XUE Daoxin	2017	Acta Agriculturae Boreali-Sinica	100.8	38.61	Capsicum annuum L.	Dicotyledons	Solanaceae	Woody	The flowering period	Mid period	Dry matter	0.65	Medium stress	25d	Medium-term stress	3	3	88.03	15.2472	99.4	17.2166
17	314	WANG Shijie, ZHANG Hengjia, YANG Xiaoting, WANG Yucai, XUE Daoxin	2017	Acta Agriculturae Boreali-Sinica	100.8	38.61	Capsicum annuum L.	Dicotyledons	Solanaceae	Woody	The flowering period	Mid period	Dry matter	0.55	Medium stress	25d	Medium-term stress	3	3	68.66	11.8923	99.4	17.2166
17	315	WANG Shijie, ZHANG Hengjia, YANG Xiaoting, WANG Yucai, XUE Daoxin	2017	Acta Agriculturae Boreali-Sinica	100.8	38.61	Capsicum annuum L.	Dicotyledons	Solanaceae	Woody	The flowering period	Mid period	Dry matter	0.45	Heavy stress	25d	Medium-term stress	3	3	51.35	8.89408	99.4	17.2166
17	316	WANG Shijie, ZHANG Hengjia, YANG Xiaoting, WANG Yucai, XUE Daoxin	2017	Acta Agriculturae Boreali-Sinica	100.8	38.61	Capsicum annuum L.	Dicotyledons	Solanaceae	Woody	Seedling stage	Preceding period	Yield	0.65	Medium stress	29d	Medium-term stress	3	3	34663.7	6003.93	35404.6	6132.25
17	317	WANG Shijie, ZHANG Hengjia, YANG Xiaoting, WANG Yucai, XUE Daoxin	2017	Acta Agriculturae Boreali-Sinica	100.8	38.61	Capsicum annuum L.	Dicotyledons	Solanaceae	Woody	Seedling stage	Preceding period	Yield	0.55	Medium stress	29d	Medium-term stress	3	3	3443.43	596.42	35404.6	6132.25
17	318	WANG Shijie, ZHANG Hengjia, YANG Xiaoting, WANG Yucai, XUE Daoxin	2017	Acta Agriculturae Boreali-Sinica	100.8	38.61	Capsicum annuum L.	Dicotyledons	Solanaceae	Woody	Seedling stage	Preceding period	Yield	0.45	Heavy stress	29d	Medium-term stress	3	3	28892.3	5004.3	35404.6	6132.25
17	319	WANG Shijie, ZHANG Hengjia, YANG Xiaoting, WANG Yucai, XUE Daoxin	2017	Acta Agriculturae Boreali-Sinica	100.8	38.61	Capsicum annuum L.	Dicotyledons	Solanaceae	Woody	The flowering period	Mid period	Yield	0.65	Medium stress	25d	Medium-term stress	3	3	32369.2	5606.5	35404.6	6132.25
17	320	WANG Shijie, ZHANG Hengjia, YANG Xiaoting, WANG Yucai, XUE Daoxin	2017	Acta Agriculturae Boreali-Sinica	100.8	38.61	Capsicum annuum L.	Dicotyledons	Solanaceae	Woody	The flowering period	Mid period	Yield	0.55	Medium stress	25d	Medium-term stress	3	3	30948.3	5360.4	35404.6	6132.25
17	321	WANG Shijie, ZHANG Hengjia, YANG Xiaoting, WANG Yucai, XUE Daoxin	2017	Acta Agriculturae Boreali-Sinica	100.8	38.61	Capsicum annuum L.	Dicotyledons	Solanaceae	Woody	The flowering period	Mid period	Yield	0.45	Heavy stress	25d	Medium-term stress	3	3	26181.4	4534.75	35404.6	6132.25
17	322	WANG Shijie, ZHANG Hengjia, YANG Xiaoting, WANG Yucai, XUE Daoxin	2017	Acta Agriculturae Boreali-Sinica	100.8	38.61	Capsicum annuum L.	Dicotyledons	Solanaceae	Woody	Seedling stage	Preceding period	WUE	0.65	Medium stress	29d	Medium-term stress	3	3	127.43	22.0715	122.45	21.209
17	323	WANG Shijie, ZHANG Hengjia, YANG Xiaoting, WANG Yucai, XUE Daoxin	2017	Acta Agriculturae Boreali-Sinica	100.8	38.61	Capsicum annuum L.	Dicotyledons	Solanaceae	Woody	Seedling stage	Preceding period	WUE	0.55	Medium stress	29d	Medium-term stress	3	3	133	23.0363	122.45	21.209
17	324	WANG Shijie, ZHANG Hengjia, YANG Xiaoting, WANG Yucai, XUE Daoxin	2017	Acta Agriculturae Boreali-Sinica	100.8	38.61	Capsicum annuum L.	Dicotyledons	Solanaceae	Woody	Seedling stage	Preceding period	WUE	0.45	Heavy stress	29d	Medium-term stress	3	3	126.62	21.9312	122.45	21.209
17	325	WANG Shijie, ZHANG Hengjia, YANG Xiaoting, WANG Yucai, XUE Daoxin	2017	Acta Agriculturae Boreali-Sinica	100.8	38.61	Capsicum annuum L.	Dicotyledons	Solanaceae	Woody	The flowering period	Mid period	WUE	0.65	Medium stress	25d	Medium-term stress	3	3	126.13	21.8464	122.45	21.209
17	326	WANG Shijie, ZHANG Hengjia, YANG Xiaoting, WANG Yucai, XUE Daoxin	2017	Acta Agriculturae Boreali-Sinica	100.8	38.61	Capsicum annuum L.	Dicotyledons	Solanaceae	Woody	The flowering period	Mid period	WUE	0.55	Medium stress	25d	Medium-term stress	3	3	122.1	21.1483	122.45	21.209
17	327	WANG Shijie, ZHANG Hengjia, YANG Xiaoting, WANG Yucai, XUE Daoxin	2017	Acta Agriculturae Boreali-Sinica	100.8	38.61	Capsicum annuum L.	Dicotyledons	Solanaceae	Woody	The flowering period	Mid period	WUE	0.45	Heavy stress	25d	Medium-term stress	3	3	118.37	20.5023	122.45	21.209
18	328	HAN Kanhong, ZHANG Jizong, WANG Weijing, HAO Yaxing, ZHANG Lifeng, LIU Yuhua	2015	Journal of Irrigation and Drainage	114.873	41.1903	Beta vulgaris L.	Dicotyledons	Chenopodiaceae	Herbaceous	Seedling stage	Preceding period	Plant height	0.55	Medium stress	40d	Medium-term stress	3	3	32.1304	5.56515	57.8261	10.0158
18	329	HAN Kanhong, ZHANG Jizong, WANG Weijing, HAO Yaxing, ZHANG Lifeng, LIU Yuhua	2015	Journal of Irrigation and Drainage	114.873	41.1903	Beta vulgaris L.	Dicotyledons	Chenopodiaceae	Herbaceous	Leaf cluster stage	Mid period	Plant height	0.55	Medium stress	40d	Medium-term stress	3	3	44.1304	7.64362	57.8261	10.0158
18	330	HAN Kanhong, ZHANG Jizong, WANG Weijing, HAO Yaxing, ZHANG Lifeng, LIU Yuhua	2015	Journal of Irrigation and Drainage	114.873	41.1903	Beta vulgaris L.	Dicotyledons	Chenopodiaceae	Herbaceous	Dilatation stage	Later period	Plant height	0.55	Medium stress	20d	Short-term coercion	3	3	60.0435	10.3998	57.8261	10.0158
18	331	HAN Kanhong, ZHANG Jizong, WANG Weijing, HAO Yaxing, ZHANG Lifeng, LIU Yuhua	2015	Journal of Irrigation and Drainage	114.873	41.1903	Beta vulgaris L.	Dicotyledons	Chenopodiaceae	Herbaceous	Seedling stage	Preceding period	Yield	0.55	Medium stress	40d	Medium-term stress	3	3	21770.8	3770.82	43328.1	7504.65
18	332	HAN Kanhong, ZHANG Jizong, WANG Weijing, HAO Yaxing, ZHANG Lifeng, LIU Yuhua	2015	Journal of Irrigation and Drainage	114.873	41.1903	Beta vulgaris L.	Dicotyledons	Chenopodiaceae	Herbaceous	Leaf cluster stage	Mid period	Yield	0.55	Medium stress	40d	Medium-term stress	3	3	24017.9	4160.02	43328.1	7504.65
18	333	HAN Kanhong, ZHANG Jizong, WANG Weijing, HAO Yaxing, ZHANG Lifeng, LIU Yuhua	2015	Journal of Irrigation and Drainage	114.873	41.1903	Beta vulgaris L.	Dicotyledons	Chenopodiaceae	Herbaceous	Dilatation stage	Later period	Yield	0.55	Medium stress	20d	Short-term coercion	3	3	35720.2	6186.93	43328.1	7504.65
19	334	YUE Wenjun, ZHANG Fucang	2011	Proceedings of the 2011 Annual Conference of the Chinese Society of Agricultural Engineering	108.075	34.2711	Triticum aestivum L.	Monocotyledon	Graminae	Herbaceous	Rejuvenation stage	Preceding period	Plant height	0.55	Medium stress	15d	Short-term coercion	3	3	43.75	7.57772	47.24	8.18221
19	335	YUE Wenjun, ZHANG Fucang	2011	Proceedings of the 2011 Annual Conference of the Chinese Society of Agricultural Engineering	108.075	34.2711	Triticum aestivum L.	Monocotyledon	Graminae	Herbaceous	Rejuvenation stage	Preceding period	Plant height	0.4	Heavy stress	15d	Short-term coercion	3	3	32.37	5.60665	47.24	8.18221
19	336	YUE Wenjun, ZHANG Fucang	2011	Proceedings of the 2011 Annual Conference of the Chinese Society of Agricultural Engineering	108.075	34.2711	Triticum aestivum L.	Monocotyledon	Graminae	Herbaceous	Rejuvenation stage	Preceding period	Plant height	0.55	Medium stress	15d	Short-term coercion	3	3	44.66	7.73534	48.17	8.34329
19	337	YUE Wenjun, ZHANG Fucang	2011	Proceedings of the 2011 Annual Conference of the Chinese Society of Agricultural Engineering	108.075	34.2711	Triticum aestivum L.	Monocotyledon	Graminae	Herbaceous	Rejuvenation stage	Preceding period	Plant height	0.4	Heavy stress	15d	Short-term coercion	3	3	33.4	5.78505	48.17	8.34329
19	338	YUE Wenjun, ZHANG Fucang	2011	Proceedings of the 2011 Annual Conference of the Chinese Society of Agricultural Engineering	108.075	34.2711	Triticum aestivum L.	Monocotyledon	Graminae	Herbaceous	Rejuvenation stage	Preceding period	Plant height	0.55	Medium stress	15d	Short-term coercion	3	3	39.4	6.82428	52.13	9.02918
19	339	YUE Wenjun, ZHANG Fucang	2011	Proceedings of the 2011 Annual Conference of the Chinese Society of Agricultural Engineering	108.075	34.2711	Triticum aestivum L.	Monocotyledon	Graminae	Herbaceous	Rejuvenation stage	Preceding period	Plant height	0.4	Heavy stress	15d	Short-term coercion	3	3	32.72	5.66727	52.13	9.02918
19	340	YUE Wenjun, ZHANG Fucang	2011	Proceedings of the 2011 Annual Conference of the Chinese Society of Agricultural Engineering	108.075	34.2711	Triticum aestivum L.	Monocotyledon	Graminae	Herbaceous	Rejuvenation stage	Preceding period	Pn	0.55	Medium stress	15d	Short-term coercion	3	3	18.742	3.24621	16.399	2.84039
19	341	YUE Wenjun, ZHANG Fucang	2011	Proceedings of the 2011 Annual Conference of the Chinese Society of Agricultural Engineering	108.075	34.2711	Triticum aestivum L.	Monocotyledon	Graminae	Herbaceous	Rejuvenation stage	Preceding period	Pn	0.4	Heavy stress	15d	Short-term coercion	3	3	17.432	3.01931	16.399	2.84039
19	342	YUE Wenjun, ZHANG Fucang	2011	Proceedings of the 2011 Annual Conference of the Chinese Society of Agricultural Engineering	108.075	34.2711	Triticum aestivum L.	Monocotyledon	Graminae	Herbaceous	Rejuvenation stage	Preceding period	Pn	0.55	Medium stress	15d	Short-term coercion	3	3	19.566	3.38893	16.853	2.91903
19	343	YUE Wenjun, ZHANG Fucang	2011	Proceedings of the 2011 Annual Conference of the Chinese Society of Agricultural Engineering	108.075	34.2711	Triticum aestivum L.	Monocotyledon	Graminae	Herbaceous	Rejuvenation stage	Preceding period	Pn	0.4	Heavy stress	15d	Short-term coercion	3	3	18.915	3.27617	16.853	2.91903
19	344	YUE Wenjun, ZHANG Fucang	2011	Proceedings of the 2011 Annual Conference of the Chinese Society of Agricultural Engineering	108.075	34.2711	Triticum aestivum L.	Monocotyledon	Graminae	Herbaceous	Rejuvenation stage	Preceding period	Pn	0.55	Medium stress	15d	Short-term coercion	3	3	20.819	3.60596	17.957	3.11024
19	345	YUE Wenjun, ZHANG Fucang	2011	Proceedings of the 2011 Annual Conference of the Chinese Society of Agricultural Engineering	108.075	34.2711	Triticum aestivum L.	Monocotyledon	Graminae	Herbaceous	Rejuvenation stage	Preceding period	Pn	0.4	Heavy stress	15d	Short-term coercion	3	3	18.565	3.21555	17.957	3.11024
19	346	YUE Wenjun, ZHANG Fucang	2011	Proceedings of the 2011 Annual Conference of the Chinese Society of Agricultural Engineering	108.075	34.2711	Triticum aestivum L.	Monocotyledon	Graminae	Herbaceous	Rejuvenation stage	Preceding period	Tr	0.55	Medium stress	15d	Short-term coercion	3	3	2.426	0.420196	2.938	0.508877
19	347	YUE Wenjun, ZHANG Fucang	2011	Proceedings of the 2011 Annual Conference of the Chinese Society of Agricultural Engineering	108.075	34.2711	Triticum aestivum L.	Monocotyledon	Graminae	Herbaceous	Rejuvenation stage	Preceding period	Tr	0.4	Heavy stress	15d	Short-term coercion	3	3	1.947	0.33723	2.938	0.508877
19	348	YUE Wenjun, ZHANG Fucang	2011	Proceedings of the 2011 Annual Conference of the Chinese Society of Agricultural Engineering	108.075	34.2711	Triticum aestivum L.	Monocotyledon	Graminae	Herbaceous	Rejuvenation stage	Preceding period	Tr	0.55	Medium stress	15d	Short-term coercion	3	3	2.669	0.462284	2.875	0.497965
19	349	YUE Wenjun, ZHANG Fucang	2011	Proceedings of the 2011 Annual Conference of the Chinese Society of Agricultural Engineering	108.075	34.2711	Triticum aestivum L.	Monocotyledon	Graminae	Herbaceous	Rejuvenation stage	Preceding period	Tr	0.4	Heavy stress	15d	Short-term coercion	3	3	2.519	0.436304	2.875	0.497965
19	350	YUE Wenjun, ZHANG Fucang	2011	Proceedings of the 2011 Annual Conference of the Chinese Society of Agricultural Engineering	108.075	34.2711	Triticum aestivum L.	Monocotyledon	Graminae	Herbaceous	Rejuvenation stage	Preceding period	Tr	0.55	Medium stress	15d	Short-term coercion	3	3	2.434	0.421581	3.22	0.55772
19	351	YUE Wenjun, ZHANG Fucang	2011	Proceedings of the 2011 Annual Conference of the Chinese Society of Agricultural Engineering	108.075	34.2711	Triticum aestivum L.	Monocotyledon	Graminae	Herbaceous	Rejuvenation stage	Preceding period	Tr	0.4	Heavy stress	15d	Short-term coercion	3	3	2.131	0.3691	3.22	0.55772
19	352	YUE Wenjun, ZHANG Fucang	2011	Proceedings of the 2011 Annual Conference of the Chinese Society of Agricultural Engineering	108.075	34.2711	Triticum aestivum L.	Monocotyledon	Graminae	Herbaceous	Rejuvenation stage	Preceding period	WUE	0.55	Medium stress	15d	Short-term coercion	3	3	7.724	1.33784	5.582	0.966831
19	353	YUE Wenjun, ZHANG Fucang	2011	Proceedings of the 2011 Annual Conference of the Chinese Society of Agricultural Engineering	108.075	34.2711	Triticum aestivum L.	Monocotyledon	Graminae	Herbaceous	Rejuvenation stage	Preceding period	WUE	0.4	Heavy stress	15d	Short-term coercion	3	3	8.952	1.55053	5.582	0.966831
19	354	YUE Wenjun, ZHANG Fucang	2011	Proceedings of the 2011 Annual Conference of the Chinese Society of Agricultural Engineering	108.075	34.2711	Triticum aestivum L.	Monocotyledon	Graminae	Herbaceous	Rejuvenation stage	Preceding period	WUE	0.55	Medium stress	15d	Short-term coercion	3	3	7.331	1.26977	5.861	1.01515
19	355	YUE Wenjun, ZHANG Fucang	2011	Proceedings of the 2011 Annual Conference of the Chinese Society of Agricultural Engineering	108.075	34.2711	Triticum aestivum L.	Monocotyledon	Graminae	Herbaceous	Rejuvenation stage	Preceding period	WUE	0.4	Heavy stress	15d	Short-term coercion	3	3	7.51	1.30077	5.861	1.01515
19	356	YUE Wenjun, ZHANG Fucang	2011	Proceedings of the 2011 Annual Conference of the Chinese Society of Agricultural Engineering	108.075	34.2711	Triticum aestivum L.	Monocotyledon	Graminae	Herbaceous	Rejuvenation stage	Preceding period	WUE	0.55	Medium stress	15d	Short-term coercion	3	3	8.555	1.48177	5.576	0.965792
19	357	YUE Wenjun, ZHANG Fucang	2011	Proceedings of the 2011 Annual Conference of the Chinese Society of Agricultural Engineering	108.075	34.2711	Triticum aestivum L.	Monocotyledon	Graminae	Herbaceous	Rejuvenation stage	Preceding period	WUE	0.4	Heavy stress	15d	Short-term coercion	3	3	8.71	1.50862	5.576	0.965792
19	358	YUE Wenjun, ZHANG Fucang	2011	Proceedings of the 2011 Annual Conference of the Chinese Society of Agricultural Engineering	108.075	34.2711	Triticum aestivum L.	Monocotyledon	Graminae	Herbaceous	Rejuvenation stage	Preceding period	Dry matter	0.55	Medium stress	15d	Short-term coercion	3	3	10.62	1.83944	11.21	1.94163
19	359	YUE Wenjun, ZHANG Fucang	2011	Proceedings of the 2011 Annual Conference of the Chinese Society of Agricultural Engineering	108.075	34.2711	Triticum aestivum L.	Monocotyledon	Graminae	Herbaceous	Rejuvenation stage	Preceding period	Dry matter	0.4	Heavy stress	15d	Short-term coercion	3	3	8.8	1.5242	11.21	1.94163
19	360	YUE Wenjun, ZHANG Fucang	2011	Proceedings of the 2011 Annual Conference of the Chinese Society of Agricultural Engineering	108.075	34.2711	Triticum aestivum L.	Monocotyledon	Graminae	Herbaceous	Rejuvenation stage	Preceding period	Dry matter	0.55	Medium stress	15d	Short-term coercion	3	3	11.48	1.98839	12.37	2.14255
19	361	YUE Wenjun, ZHANG Fucang	2011	Proceedings of the 2011 Annual Conference of the Chinese Society of Agricultural Engineering	108.075	34.2711	Triticum aestivum L.	Monocotyledon	Graminae	Herbaceous	Rejuvenation stage	Preceding period	Dry matter	0.4	Heavy stress	15d	Short-term coercion	3	3	9.32	1.61427	12.37	2.14255
19	362	YUE Wenjun, ZHANG Fucang	2011	Proceedings of the 2011 Annual Conference of the Chinese Society of Agricultural Engineering	108.075	34.2711	Triticum aestivum L.	Monocotyledon	Graminae	Herbaceous	Rejuvenation stage	Preceding period	Dry matter	0.55	Medium stress	15d	Short-term coercion	3	3	16.28	2.81978	16.77	2.90465
19	363	YUE Wenjun, ZHANG Fucang	2011	Proceedings of the 2011 Annual Conference of the Chinese Society of Agricultural Engineering	108.075	34.2711	Triticum aestivum L.	Monocotyledon	Graminae	Herbaceous	Rejuvenation stage	Preceding period	Dry matter	0.4	Heavy stress	15d	Short-term coercion	3	3	11.96	2.07153	16.77	2.90465
19	364	YUE Wenjun, ZHANG Fucang	2011	Proceedings of the 2011 Annual Conference of the Chinese Society of Agricultural Engineering	108.075	34.2711	Triticum aestivum L.	Monocotyledon	Graminae	Herbaceous	Rejuvenation stage	Preceding period	Yield	0.55	Medium stress	15d	Short-term coercion	3	3	48.6682	2.73687	45.5079	3.83162
19	365	YUE Wenjun, ZHANG Fucang	2011	Proceedings of the 2011 Annual Conference of the Chinese Society of Agricultural Engineering	108.075	34.2711	Triticum aestivum L.	Monocotyledon	Graminae	Herbaceous	Rejuvenation stage	Preceding period	Yield	0.4	Heavy stress	15d	Short-term coercion	3	3	35.7111	14.7791	45.5079	3.83162
19	366	YUE Wenjun, ZHANG Fucang	2011	Proceedings of the 2011 Annual Conference of the Chinese Society of Agricultural Engineering	108.075	34.2711	Triticum aestivum L.	Monocotyledon	Graminae	Herbaceous	Rejuvenation stage	Preceding period	Yield	0.55	Medium stress	15d	Short-term coercion	3	3	52.7765	4.379	50.5643	2.46319
19	367	YUE Wenjun, ZHANG Fucang	2011	Proceedings of the 2011 Annual Conference of the Chinese Society of Agricultural Engineering	108.075	34.2711	Triticum aestivum L.	Monocotyledon	Graminae	Herbaceous	Rejuvenation stage	Preceding period	Yield	0.4	Heavy stress	15d	Short-term coercion	3	3	38.2393	11.4949	50.5643	2.46319
19	368	YUE Wenjun, ZHANG Fucang	2011	Proceedings of the 2011 Annual Conference of the Chinese Society of Agricultural Engineering	108.075	34.2711	Triticum aestivum L.	Monocotyledon	Graminae	Herbaceous	Rejuvenation stage	Preceding period	Yield	0.55	Medium stress	15d	Short-term coercion	3	3	58.307	2.46319	53.2506	4.10531
19	369	YUE Wenjun, ZHANG Fucang	2011	Proceedings of the 2011 Annual Conference of the Chinese Society of Agricultural Engineering	108.075	34.2711	Triticum aestivum L.	Monocotyledon	Graminae	Herbaceous	Rejuvenation stage	Preceding period	Yield	0.4	Heavy stress	15d	Short-term coercion	3	3	46.456	3.28425	53.2506	4.10531
20	370	ZHENG Guiping, YIN Dawei, LIU Lihua, WANG Xiuzhi, WANG Bolun	2009	Acta Agriculturae Boreali-Sinica	125.175	46.5936	Oryza sativa L.	Monocotyledon	Graminae	Herbaceous	Tillering stage	Preceding period	Yield	-30kPa	Medium stress	10d	Short-term coercion	8	8	13.42	3.79575	19.91	5.6314
20	371	ZHENG Guiping, YIN Dawei, LIU Lihua, WANG Xiuzhi, WANG Bolun	2009	Acta Agriculturae Boreali-Sinica	125.175	46.5936	Oryza sativa L.	Monocotyledon	Graminae	Herbaceous	Tillering stage	Preceding period	Yield	-60kPa	Heavy stress	10d	Short-term coercion	8	8	12.79	3.61756	19.91	5.6314
20	372	ZHENG Guiping, YIN Dawei, LIU Lihua, WANG Xiuzhi, WANG Bolun	2009	Acta Agriculturae Boreali-Sinica	125.175	46.5936	Oryza sativa L.	Monocotyledon	Graminae	Herbaceous	Booting stage	Mid period	Yield	-30kPa	Medium stress	10d	Short-term coercion	8	8	10.91	3.08581	19.91	5.6314
20	373	ZHENG Guiping, YIN Dawei, LIU Lihua, WANG Xiuzhi, WANG Bolun	2009	Acta Agriculturae Boreali-Sinica	125.175	46.5936	Oryza sativa L.	Monocotyledon	Graminae	Herbaceous	Booting stage	Mid period	Yield	-60kPa	Heavy stress	10d	Short-term coercion	8	8	10.21	2.88782	19.91	5.6314
20	374	ZHENG Guiping, YIN Dawei, LIU Lihua, WANG Xiuzhi, WANG Bolun	2009	Acta Agriculturae Boreali-Sinica	125.175	46.5936	Oryza sativa L.	Monocotyledon	Graminae	Herbaceous	Tasseling stage	Mid period	Yield	-30kPa	Medium stress	10d	Short-term coercion	8	8	15.88	4.49154	19.91	5.6314
20	375	ZHENG Guiping, YIN Dawei, LIU Lihua, WANG Xiuzhi, WANG Bolun	2009	Acta Agriculturae Boreali-Sinica	125.175	46.5936	Oryza sativa L.	Monocotyledon	Graminae	Herbaceous	Tasseling stage	Mid period	Yield	-60kPa	Heavy stress	10d	Short-term coercion	8	8	15.47	4.37558	19.91	5.6314
20	376	ZHENG Guiping, YIN Dawei, LIU Lihua, WANG Xiuzhi, WANG Bolun	2009	Acta Agriculturae Boreali-Sinica	125.175	46.5936	Oryza sativa L.	Monocotyledon	Graminae	Herbaceous	Tasseling stage	Mid period	Yield	-30kPa	Medium stress	10d	Short-term coercion	8	8	18.33	5.18451	19.91	5.6314
20	377	ZHENG Guiping, YIN Dawei, LIU Lihua, WANG Xiuzhi, WANG Bolun	2009	Acta Agriculturae Boreali-Sinica	125.175	46.5936	Oryza sativa L.	Monocotyledon	Graminae	Herbaceous	Tasseling stage	Mid period	Yield	-60kPa	Heavy stress	10d	Short-term coercion	8	8	18.52	5.23825	19.91	5.6314
20	378	ZHENG Guiping, YIN Dawei, LIU Lihua, WANG Xiuzhi, WANG Bolun	2009	Acta Agriculturae Boreali-Sinica	125.175	46.5936	Oryza sativa L.	Monocotyledon	Graminae	Herbaceous	Tasseling stage	Mid period	Yield	-30kPa	Medium stress	10d	Short-term coercion	8	8	20.73	5.86333	19.91	5.6314
20	379	ZHENG Guiping, YIN Dawei, LIU Lihua, WANG Xiuzhi, WANG Bolun	2009	Acta Agriculturae Boreali-Sinica	125.175	46.5936	Oryza sativa L.	Monocotyledon	Graminae	Herbaceous	Tasseling stage	Mid period	Yield	-60kPa	Heavy stress	10d	Short-term coercion	8	8	17.42	4.92712	19.91	5.6314
20	380	ZHENG Guiping, YIN Dawei, LIU Lihua, WANG Xiuzhi, WANG Bolun	2009	Acta Agriculturae Boreali-Sinica	125.175	46.5936	Oryza sativa L.	Monocotyledon	Graminae	Herbaceous	Tillering stage	Preceding period	Yield	-60kPa	Heavy stress	10d	Short-term coercion	8	8	11.45	3.23855	15.6	4.41235
20	381	ZHENG Guiping, YIN Dawei, LIU Lihua, WANG Xiuzhi, WANG Bolun	2009	Acta Agriculturae Boreali-Sinica	125.175	46.5936	Oryza sativa L.	Monocotyledon	Graminae	Herbaceous	Booting stage	Mid period	Yield	-30kPa	Medium stress	10d	Short-term coercion	8	8	12.51	3.53836	15.6	4.41235
20	382	ZHENG Guiping, YIN Dawei, LIU Lihua, WANG Xiuzhi, WANG Bolun	2009	Acta Agriculturae Boreali-Sinica	125.175	46.5936	Oryza sativa L.	Monocotyledon	Graminae	Herbaceous	Booting stage	Mid period	Yield	-60kPa	Heavy stress	10d	Short-term coercion	8	8	7.47	2.11284	15.6	4.41235
20	383	ZHENG Guiping, YIN Dawei, LIU Lihua, WANG Xiuzhi, WANG Bolun	2009	Acta Agriculturae Boreali-Sinica	125.175	46.5936	Oryza sativa L.	Monocotyledon	Graminae	Herbaceous	Tasseling stage	Mid period	Yield	-30kPa	Medium stress	10d	Short-term coercion	8	8	7.55	2.13546	15.6	4.41235
20	384	ZHENG Guiping, YIN Dawei, LIU Lihua, WANG Xiuzhi, WANG Bolun	2009	Acta Agriculturae Boreali-Sinica	125.175	46.5936	Oryza sativa L.	Monocotyledon	Graminae	Herbaceous	Tasseling stage	Mid period	Yield	-60kPa	Heavy stress	10d	Short-term coercion	8	8	11.53	3.26118	15.6	4.41235
20	385	ZHENG Guiping, YIN Dawei, LIU Lihua, WANG Xiuzhi, WANG Bolun	2009	Acta Agriculturae Boreali-Sinica	125.175	46.5936	Oryza sativa L.	Monocotyledon	Graminae	Herbaceous	Tasseling stage	Mid period	Yield	-30kPa	Medium stress	10d	Short-term coercion	8	8	13.03	3.68544	15.6	4.41235
20	386	ZHENG Guiping, YIN Dawei, LIU Lihua, WANG Xiuzhi, WANG Bolun	2009	Acta Agriculturae Boreali-Sinica	125.175	46.5936	Oryza sativa L.	Monocotyledon	Graminae	Herbaceous	Tasseling stage	Mid period	Yield	-60kPa	Heavy stress	10d	Short-term coercion	8	8	17.91	5.06571	15.6	4.41235
20	387	ZHENG Guiping, YIN Dawei, LIU Lihua, WANG Xiuzhi, WANG Bolun	2009	Acta Agriculturae Boreali-Sinica	125.175	46.5936	Oryza sativa L.	Monocotyledon	Graminae	Herbaceous	Tasseling stage	Mid period	Yield	-30kPa	Medium stress	10d	Short-term coercion	8	8	18.39	5.20148	15.6	4.41235
20	388	ZHENG Guiping, YIN Dawei, LIU Lihua, WANG Xiuzhi, WANG Bolun	2009	Acta Agriculturae Boreali-Sinica	125.175	46.5936	Oryza sativa L.	Monocotyledon	Graminae	Herbaceous	Tasseling stage	Mid period	Yield	-60kPa	Heavy stress	10d	Short-term coercion	8	8	15.28	4.32184	15.6	4.41235
20	389	ZHENG Guiping, YIN Dawei, LIU Lihua, WANG Xiuzhi, WANG Bolun	2009	Acta Agriculturae Boreali-Sinica	125.175	46.5936	Oryza sativa L.	Monocotyledon	Graminae	Herbaceous	Tasseling stage	Mid period	Yield	-60kPa	Heavy stress	10d	Short-term coercion	8	8	12.78	3.61473	15.6	4.41235
20	390	ZHENG Guiping, YIN Dawei, LIU Lihua, WANG Xiuzhi, WANG Bolun	2009	Acta Agriculturae Boreali-Sinica	125.175	46.5936	Oryza sativa L.	Monocotyledon	Graminae	Herbaceous	Tillering stage	Preceding period	Plant height	-30kPa	Medium stress	10d	Short-term coercion	8	8	74.491	21.0692	72.5749	20.5273
20	391	ZHENG Guiping, YIN Dawei, LIU Lihua, WANG Xiuzhi, WANG Bolun	2009	Acta Agriculturae Boreali-Sinica	125.175	46.5936	Oryza sativa L.	Monocotyledon	Graminae	Herbaceous	Tillering stage	Preceding period	Plant height	-60kPa	Heavy stress	10d	Short-term coercion	8	8	70.6587	19.9853	72.5749	20.5273
20	392	ZHENG Guiping, YIN Dawei, LIU Lihua, WANG Xiuzhi, WANG Bolun	2009	Acta Agriculturae Boreali-Sinica	125.175	46.5936	Oryza sativa L.	Monocotyledon	Graminae	Herbaceous	Booting stage	Mid period	Plant height	-30kPa	Medium stress	10d	Short-term coercion	8	8	61.0778	17.2754	72.5749	20.5273
20	393	ZHENG Guiping, YIN Dawei, LIU Lihua, WANG Xiuzhi, WANG Bolun	2009	Acta Agriculturae Boreali-Sinica	125.175	46.5936	Oryza sativa L.	Monocotyledon	Graminae	Herbaceous	Booting stage	Mid period	Plant height	-60kPa	Heavy stress	10d	Short-term coercion	8	8	57.485	16.2592	72.5749	20.5273
20	394	ZHENG Guiping, YIN Dawei, LIU Lihua, WANG Xiuzhi, WANG Bolun	2009	Acta Agriculturae Boreali-Sinica	125.175	46.5936	Oryza sativa L.	Monocotyledon	Graminae	Herbaceous	Tasseling stage	Mid period	Plant height	-30kPa	Medium stress	10d	Short-term coercion	8	8	65.8683	18.6304	72.5749	20.5273
20	395	ZHENG Guiping, YIN Dawei, LIU Lihua, WANG Xiuzhi, WANG Bolun	2009	Acta Agriculturae Boreali-Sinica	125.175	46.5936	Oryza sativa L.	Monocotyledon	Graminae	Herbaceous	Tasseling stage	Mid period	Plant height	-60kPa	Heavy stress	10d	Short-term coercion	8	8	68.982	19.5111	72.5749	20.5273
20	396	ZHENG Guiping, YIN Dawei, LIU Lihua, WANG Xiuzhi, WANG Bolun	2009	Acta Agriculturae Boreali-Sinica	125.175	46.5936	Oryza sativa L.	Monocotyledon	Graminae	Herbaceous	Tasseling stage	Mid period	Plant height	-30kPa	Medium stress	10d	Short-term coercion	8	8	71.1377	20.1208	72.5749	20.5273
20	397	ZHENG Guiping, YIN Dawei, LIU Lihua, WANG Xiuzhi, WANG Bolun	2009	Acta Agriculturae Boreali-Sinica	125.175	46.5936	Oryza sativa L.	Monocotyledon	Graminae	Herbaceous	Tasseling stage	Mid period	Plant height	-60kPa	Heavy stress	10d	Short-term coercion	8	8	67.5449	19.1046	72.5749	20.5273
20	398	ZHENG Guiping, YIN Dawei, LIU Lihua, WANG Xiuzhi, WANG Bolun	2009	Acta Agriculturae Boreali-Sinica	125.175	46.5936	Oryza sativa L.	Monocotyledon	Graminae	Herbaceous	Tasseling stage	Mid period	Plant height	-30kPa	Medium stress	10d	Short-term coercion	8	8	60.5988	17.1399	72.5749	20.5273
20	399	ZHENG Guiping, YIN Dawei, LIU Lihua, WANG Xiuzhi, WANG Bolun	2009	Acta Agriculturae Boreali-Sinica	125.175	46.5936	Oryza sativa L.	Monocotyledon	Graminae	Herbaceous	Tasseling stage	Mid period	Plant height	-60kPa	Heavy stress	10d	Short-term coercion	8	8	63.5988	17.9885	72.5749	20.5273
20	400	ZHENG Guiping, YIN Dawei, LIU Lihua, WANG Xiuzhi, WANG Bolun	2009	Acta Agriculturae Boreali-Sinica	125.175	46.5936	Oryza sativa L.	Monocotyledon	Graminae	Herbaceous	Tillering stage	Preceding period	Plant height	-60kPa	Heavy stress	10d	Short-term coercion	8	8	70.6341	19.9784	68.6829	19.4265
20	401	ZHENG Guiping, YIN Dawei, LIU Lihua, WANG Xiuzhi, WANG Bolun	2009	Acta Agriculturae Boreali-Sinica	125.175	46.5936	Oryza sativa L.	Monocotyledon	Graminae	Herbaceous	Booting stage	Mid period	Plant height	-30kPa	Medium stress	10d	Short-term coercion	8	8	66.7317	18.8746	68.6829	19.4265
20	402	ZHENG Guiping, YIN Dawei, LIU Lihua, WANG Xiuzhi, WANG Bolun	2009	Acta Agriculturae Boreali-Sinica	125.175	46.5936	Oryza sativa L.	Monocotyledon	Graminae	Herbaceous	Booting stage	Mid period	Plant height	-60kPa	Heavy stress	10d	Short-term coercion	8	8	60.6829	17.1637	68.6829	19.4265
20	403	ZHENG Guiping, YIN Dawei, LIU Lihua, WANG Xiuzhi, WANG Bolun	2009	Acta Agriculturae Boreali-Sinica	125.175	46.5936	Oryza sativa L.	Monocotyledon	Graminae	Herbaceous	Tasseling stage	Mid period	Plant height	-30kPa	Medium stress	10d	Short-term coercion	8	8	59.122	16.7222	68.6829	19.4265
20	404	ZHENG Guiping, YIN Dawei, LIU Lihua, WANG Xiuzhi, WANG Bolun	2009	Acta Agriculturae Boreali-Sinica	125.175	46.5936	Oryza sativa L.	Monocotyledon	Graminae	Herbaceous	Tasseling stage	Mid period	Plant height	-60kPa	Heavy stress	10d	Short-term coercion	8	8	73.7561	20.8614	68.6829	19.4265
20	405	ZHENG Guiping, YIN Dawei, LIU Lihua, WANG Xiuzhi, WANG Bolun	2009	Acta Agriculturae Boreali-Sinica	125.175	46.5936	Oryza sativa L.	Monocotyledon	Graminae	Herbaceous	Tasseling stage	Mid period	Plant height	-30kPa	Medium stress	10d	Short-term coercion	8	8	72	20.3647	68.6829	19.4265
20	406	ZHENG Guiping, YIN Dawei, LIU Lihua, WANG Xiuzhi, WANG Bolun	2009	Acta Agriculturae Boreali-Sinica	125.175	46.5936	Oryza sativa L.	Monocotyledon	Graminae	Herbaceous	Tasseling stage	Mid period	Plant height	-60kPa	Heavy stress	10d	Short-term coercion	8	8	77.6585	21.9652	68.6829	19.4265
20	407	ZHENG Guiping, YIN Dawei, LIU Lihua, WANG Xiuzhi, WANG Bolun	2009	Acta Agriculturae Boreali-Sinica	125.175	46.5936	Oryza sativa L.	Monocotyledon	Graminae	Herbaceous	Tasseling stage	Mid period	Plant height	-30kPa	Medium stress	10d	Short-term coercion	8	8	75.9024	21.4685	68.6829	19.4265
20	408	ZHENG Guiping, YIN Dawei, LIU Lihua, WANG Xiuzhi, WANG Bolun	2009	Acta Agriculturae Boreali-Sinica	125.175	46.5936	Oryza sativa L.	Monocotyledon	Graminae	Herbaceous	Tasseling stage	Mid period	Plant height	-60kPa	Heavy stress	10d	Short-term coercion	8	8	65.1707	18.4331	68.6829	19.4265
20	409	ZHENG Guiping, YIN Dawei, LIU Lihua, WANG Xiuzhi, WANG Bolun	2009	Acta Agriculturae Boreali-Sinica	125.175	46.5936	Oryza sativa L.	Monocotyledon	Graminae	Herbaceous	Tasseling stage	Mid period	Plant height	-60kPa	Heavy stress	10d	Short-term coercion	8	8	63.1707	17.8674	68.6829	19.4265
21	410	CHEN Xiaoyuan, GAO Zhihong, LIU Xiaoying LUO, Yuanpei	2004	Acta Agronomica Sinica	116.294	40.0363	Triticum aestivum L.	Monocotyledon	Graminae	Herbaceous	Trifoliolate stage	Preceding period	Yield	0.55	Medium stress	15d	Short-term coercion	3	3	1.24	0.214774	2.49	0.431281
21	411	CHEN Xiaoyuan, GAO Zhihong, LIU Xiaoying LUO, Yuanpei	2004	Acta Agronomica Sinica	116.294	40.0363	Triticum aestivum L.	Monocotyledon	Graminae	Herbaceous	Trifoliolate stage	Preceding period	Yield	0.55	Medium stress	22d	Medium-term stress	3	3	1.14	0.197454	2.49	0.431281
21	412	CHEN Xiaoyuan, GAO Zhihong, LIU Xiaoying LUO, Yuanpei	2004	Acta Agronomica Sinica	116.294	40.0363	Triticum aestivum L.	Monocotyledon	Graminae	Herbaceous	Tillering stage	Preceding period	Yield	0.55	Medium stress	17d	Short-term coercion	3	3	1.52	0.263272	2.49	0.431281
21	413	CHEN Xiaoyuan, GAO Zhihong, LIU Xiaoying LUO, Yuanpei	2004	Acta Agronomica Sinica	116.294	40.0363	Triticum aestivum L.	Monocotyledon	Graminae	Herbaceous	Tillering stage	Preceding period	Yield	0.55	Medium stress	21d	Medium-term stress	3	3	0.79	0.136832	2.49	0.431281
21	414	CHEN Xiaoyuan, GAO Zhihong, LIU Xiaoying LUO, Yuanpei	2004	Acta Agronomica Sinica	116.294	40.0363	Triticum aestivum L.	Monocotyledon	Graminae	Herbaceous	Jointing stage	Preceding period	Yield	0.55	Medium stress	6d	Short-term coercion	3	3	1.55	0.268468	2.49	0.431281
21	415	CHEN Xiaoyuan, GAO Zhihong, LIU Xiaoying LUO, Yuanpei	2004	Acta Agronomica Sinica	116.294	40.0363	Triticum aestivum L.	Monocotyledon	Graminae	Herbaceous	Jointing stage	Preceding period	Yield	0.55	Medium stress	11d	Short-term coercion	3	3	1.39	0.240755	2.49	0.431281
21	416	CHEN Xiaoyuan, GAO Zhihong, LIU Xiaoying LUO, Yuanpei	2004	Acta Agronomica Sinica	116.294	40.0363	Triticum aestivum L.	Monocotyledon	Graminae	Herbaceous	Trifoliolate stage	Preceding period	Yield	0.4	Heavy stress	15d	Short-term coercion	3	3	1.1	0.190526	2.49	0.431281
21	417	CHEN Xiaoyuan, GAO Zhihong, LIU Xiaoying LUO, Yuanpei	2004	Acta Agronomica Sinica	116.294	40.0363	Triticum aestivum L.	Monocotyledon	Graminae	Herbaceous	Trifoliolate stage	Preceding period	Yield	0.4	Heavy stress	22d	Medium-term stress	3	3	0.83	0.14376	2.49	0.431281
21	418	CHEN Xiaoyuan, GAO Zhihong, LIU Xiaoying LUO, Yuanpei	2004	Acta Agronomica Sinica	116.294	40.0363	Triticum aestivum L.	Monocotyledon	Graminae	Herbaceous	Tillering stage	Preceding period	Yield	0.4	Heavy stress	17d	Short-term coercion	3	3	0.93	0.161081	2.49	0.431281
21	419	CHEN Xiaoyuan, GAO Zhihong, LIU Xiaoying LUO, Yuanpei	2004	Acta Agronomica Sinica	116.294	40.0363	Triticum aestivum L.	Monocotyledon	Graminae	Herbaceous	Tillering stage	Preceding period	Yield	0.4	Heavy stress	21d	Medium-term stress	3	3	0.58	0.100459	2.49	0.431281
21	420	CHEN Xiaoyuan, GAO Zhihong, LIU Xiaoying LUO, Yuanpei	2004	Acta Agronomica Sinica	116.294	40.0363	Triticum aestivum L.	Monocotyledon	Graminae	Herbaceous	Jointing stage	Preceding period	Yield	0.4	Heavy stress	6d	Short-term coercion	3	3	0.79	0.136832	2.49	0.431281
21	421	CHEN Xiaoyuan, GAO Zhihong, LIU Xiaoying LUO, Yuanpei	2004	Acta Agronomica Sinica	116.294	40.0363	Triticum aestivum L.	Monocotyledon	Graminae	Herbaceous	Jointing stage	Preceding period	Yield	0.4	Heavy stress	11d	Short-term coercion	3	3	0.53	0.0917987	2.49	0.431281
21	422	CHEN Xiaoyuan, GAO Zhihong, LIU Xiaoying LUO, Yuanpei	2004	Acta Agronomica Sinica	116.294	40.0363	Triticum aestivum L.	Monocotyledon	Graminae	Herbaceous	Trifoliolate stage	Preceding period	WUE	0.55	Medium stress	15d	Short-term coercion	3	3	2.4	0.415692	3.4	0.588897
21	423	CHEN Xiaoyuan, GAO Zhihong, LIU Xiaoying LUO, Yuanpei	2004	Acta Agronomica Sinica	116.294	40.0363	Triticum aestivum L.	Monocotyledon	Graminae	Herbaceous	Trifoliolate stage	Preceding period	WUE	0.55	Medium stress	22d	Medium-term stress	3	3	2.3	0.398372	3.4	0.588897
21	424	CHEN Xiaoyuan, GAO Zhihong, LIU Xiaoying LUO, Yuanpei	2004	Acta Agronomica Sinica	116.294	40.0363	Triticum aestivum L.	Monocotyledon	Graminae	Herbaceous	Tillering stage	Preceding period	WUE	0.55	Medium stress	17d	Short-term coercion	3	3	2.9	0.502295	3.4	0.588897
21	425	CHEN Xiaoyuan, GAO Zhihong, LIU Xiaoying LUO, Yuanpei	2004	Acta Agronomica Sinica	116.294	40.0363	Triticum aestivum L.	Monocotyledon	Graminae	Herbaceous	Tillering stage	Preceding period	WUE	0.55	Medium stress	21d	Medium-term stress	3	3	1.8	0.311769	3.4	0.588897
21	426	CHEN Xiaoyuan, GAO Zhihong, LIU Xiaoying LUO, Yuanpei	2004	Acta Agronomica Sinica	116.294	40.0363	Triticum aestivum L.	Monocotyledon	Graminae	Herbaceous	Jointing stage	Preceding period	WUE	0.55	Medium stress	6d	Short-term coercion	3	3	2.8	0.484974	3.4	0.588897
21	427	CHEN Xiaoyuan, GAO Zhihong, LIU Xiaoying LUO, Yuanpei	2004	Acta Agronomica Sinica	116.294	40.0363	Triticum aestivum L.	Monocotyledon	Graminae	Herbaceous	Jointing stage	Preceding period	WUE	0.55	Medium stress	11d	Short-term coercion	3	3	2.7	0.467654	3.4	0.588897
21	428	CHEN Xiaoyuan, GAO Zhihong, LIU Xiaoying LUO, Yuanpei	2004	Acta Agronomica Sinica	116.294	40.0363	Triticum aestivum L.	Monocotyledon	Graminae	Herbaceous	Trifoliolate stage	Preceding period	WUE	0.4	Heavy stress	15d	Short-term coercion	3	3	2.3	0.398372	3.4	0.588897
21	429	CHEN Xiaoyuan, GAO Zhihong, LIU Xiaoying LUO, Yuanpei	2004	Acta Agronomica Sinica	116.294	40.0363	Triticum aestivum L.	Monocotyledon	Graminae	Herbaceous	Trifoliolate stage	Preceding period	WUE	0.4	Heavy stress	22d	Medium-term stress	3	3	1.9	0.32909	3.4	0.588897
21	430	CHEN Xiaoyuan, GAO Zhihong, LIU Xiaoying LUO, Yuanpei	2004	Acta Agronomica Sinica	116.294	40.0363	Triticum aestivum L.	Monocotyledon	Graminae	Herbaceous	Tillering stage	Preceding period	WUE	0.4	Heavy stress	17d	Short-term coercion	3	3	2.1	0.363731	3.4	0.588897
21	431	CHEN Xiaoyuan, GAO Zhihong, LIU Xiaoying LUO, Yuanpei	2004	Acta Agronomica Sinica	116.294	40.0363	Triticum aestivum L.	Monocotyledon	Graminae	Herbaceous	Tillering stage	Preceding period	WUE	0.4	Heavy stress	21d	Medium-term stress	3	3	1.4	0.242487	3.4	0.588897
21	432	CHEN Xiaoyuan, GAO Zhihong, LIU Xiaoying LUO, Yuanpei	2004	Acta Agronomica Sinica	116.294	40.0363	Triticum aestivum L.	Monocotyledon	Graminae	Herbaceous	Jointing stage	Preceding period	WUE	0.4	Heavy stress	6d	Short-term coercion	3	3	1.8	0.311769	3.4	0.588897
21	433	CHEN Xiaoyuan, GAO Zhihong, LIU Xiaoying LUO, Yuanpei	2004	Acta Agronomica Sinica	116.294	40.0363	Triticum aestivum L.	Monocotyledon	Graminae	Herbaceous	Jointing stage	Preceding period	WUE	0.4	Heavy stress	11d	Short-term coercion	3	3	1.2	0.207846	3.4	0.588897
22	434	LUO Aihua, GUO Xianshi, CHAI Shouxi	2008	Journal of Gansu Agricultural University	35.4	104.6	Triticum aestivum L.	Monocotyledon	Graminae	Herbaceous	Maturity period	Later period	Yield	0.45	Heavy stress	21d	Medium-term stress	5	5	21.4	4.78519	27.7	6.19391
22	435	LUO Aihua, GUO Xianshi, CHAI Shouxi	2008	Journal of Gansu Agricultural University	35.4	104.6	Triticum aestivum L.	Monocotyledon	Graminae	Herbaceous	Maturity period	Later period	Yield	0.45	Heavy stress	21d	Medium-term stress	5	5	18.8	4.20381	27.8	6.21627
22	436	LUO Aihua, GUO Xianshi, CHAI Shouxi	2008	Journal of Gansu Agricultural University	35.4	104.6	Triticum aestivum L.	Monocotyledon	Graminae	Herbaceous	Maturity period	Later period	Yield	0.45	Heavy stress	21d	Medium-term stress	5	5	21	4.69574	31	6.93181
22	437	LUO Aihua, GUO Xianshi, CHAI Shouxi	2008	Journal of Gansu Agricultural University	35.4	104.6	Triticum aestivum L.	Monocotyledon	Graminae	Herbaceous	Tasseling stage	Mid period	Yield	0.45	Heavy stress	21d	Medium-term stress	5	5	24.94	5.57675	27.7	6.19391
22	438	LUO Aihua, GUO Xianshi, CHAI Shouxi	2008	Journal of Gansu Agricultural University	35.4	104.6	Triticum aestivum L.	Monocotyledon	Graminae	Herbaceous	Tasseling stage	Mid period	Yield	0.45	Heavy stress	21d	Medium-term stress	5	5	24.36	5.44706	27.8	6.21627
22	439	LUO Aihua, GUO Xianshi, CHAI Shouxi	2008	Journal of Gansu Agricultural University	35.4	104.6	Triticum aestivum L.	Monocotyledon	Graminae	Herbaceous	Tasseling stage	Mid period	Yield	0.45	Heavy stress	21d	Medium-term stress	5	5	20.74	4.6376	31	6.93181
22	440	LUO Aihua, GUO Xianshi, CHAI Shouxi	2008	Journal of Gansu Agricultural University	35.4	104.6	Triticum aestivum L.	Monocotyledon	Graminae	Herbaceous	Maturity period	Later period	Yield	0.45	Heavy stress	21d	Medium-term stress	5	5	22.28	4.98196	45	10.0623
22	441	LUO Aihua, GUO Xianshi, CHAI Shouxi	2008	Journal of Gansu Agricultural University	35.4	104.6	Triticum aestivum L.	Monocotyledon	Graminae	Herbaceous	Maturity period	Later period	Yield	0.45	Heavy stress	21d	Medium-term stress	5	5	34.88	7.79941	40.2	8.98899
22	442	LUO Aihua, GUO Xianshi, CHAI Shouxi	2008	Journal of Gansu Agricultural University	35.4	104.6	Triticum aestivum L.	Monocotyledon	Graminae	Herbaceous	Maturity period	Later period	Yield	0.45	Heavy stress	21d	Medium-term stress	5	5	24.26	5.4247	31.8	7.1107
22	443	LUO Aihua, GUO Xianshi, CHAI Shouxi	2008	Journal of Gansu Agricultural University	35.4	104.6	Triticum aestivum L.	Monocotyledon	Graminae	Herbaceous	Tasseling stage	Mid period	Yield	0.45	Heavy stress	21d	Medium-term stress	5	5	35.22	7.87543	45	10.0623
22	444	LUO Aihua, GUO Xianshi, CHAI Shouxi	2008	Journal of Gansu Agricultural University	35.4	104.6	Triticum aestivum L.	Monocotyledon	Graminae	Herbaceous	Tasseling stage	Mid period	Yield	0.45	Heavy stress	21d	Medium-term stress	5	5	37.56	8.39867	40.2	8.98899
22	445	LUO Aihua, GUO Xianshi, CHAI Shouxi	2008	Journal of Gansu Agricultural University	35.4	104.6	Triticum aestivum L.	Monocotyledon	Graminae	Herbaceous	Tasseling stage	Mid period	Yield	0.45	Heavy stress	21d	Medium-term stress	5	5	30.42	6.80212	31.8	7.1107
22	446	LUO Aihua, GUO Xianshi, CHAI Shouxi	2008	Journal of Gansu Agricultural University	35.4	104.6	Triticum aestivum L.	Monocotyledon	Graminae	Herbaceous	Maturity period	Later period	Yield	0.45	Heavy stress	21d	Medium-term stress	5	5	30.92	6.91392	31.8	7.1107
22	447	LUO Aihua, GUO Xianshi, CHAI Shouxi	2008	Journal of Gansu Agricultural University	35.4	104.6	Triticum aestivum L.	Monocotyledon	Graminae	Herbaceous	Maturity period	Later period	Yield	0.45	Heavy stress	21d	Medium-term stress	5	5	30.08	6.72609	42.4	9.48093
22	448	LUO Aihua, GUO Xianshi, CHAI Shouxi	2008	Journal of Gansu Agricultural University	35.4	104.6	Triticum aestivum L.	Monocotyledon	Graminae	Herbaceous	Maturity period	Later period	Yield	0.45	Heavy stress	21d	Medium-term stress	5	5	23.02	5.14743	49.4	11.0462
22	449	LUO Aihua, GUO Xianshi, CHAI Shouxi	2008	Journal of Gansu Agricultural University	35.4	104.6	Triticum aestivum L.	Monocotyledon	Graminae	Herbaceous	Tasseling stage	Mid period	Yield	0.45	Heavy stress	21d	Medium-term stress	5	5	25.72	5.75117	31.8	7.1107
22	450	LUO Aihua, GUO Xianshi, CHAI Shouxi	2008	Journal of Gansu Agricultural University	35.4	104.6	Triticum aestivum L.	Monocotyledon	Graminae	Herbaceous	Tasseling stage	Mid period	Yield	0.45	Heavy stress	21d	Medium-term stress	5	5	41.38	9.25285	42.4	9.48093
22	451	LUO Aihua, GUO Xianshi, CHAI Shouxi	2008	Journal of Gansu Agricultural University	35.4	104.6	Triticum aestivum L.	Monocotyledon	Graminae	Herbaceous	Tasseling stage	Mid period	Yield	0.45	Heavy stress	21d	Medium-term stress	5	5	36.96	8.26451	49.4	11.0462
22	452	LUO Aihua, GUO Xianshi, CHAI Shouxi	2008	Journal of Gansu Agricultural University	35.4	104.6	Triticum aestivum L.	Monocotyledon	Graminae	Herbaceous	Maturity period	Later period	WUE	0.45	Heavy stress	21d	Medium-term stress	5	5	1.23	0.275036	1.3	0.290689
22	453	LUO Aihua, GUO Xianshi, CHAI Shouxi	2008	Journal of Gansu Agricultural University	35.4	104.6	Triticum aestivum L.	Monocotyledon	Graminae	Herbaceous	Maturity period	Later period	WUE	0.45	Heavy stress	21d	Medium-term stress	5	5	1.09	0.243731	1.3	0.290689
22	454	LUO Aihua, GUO Xianshi, CHAI Shouxi	2008	Journal of Gansu Agricultural University	35.4	104.6	Triticum aestivum L.	Monocotyledon	Graminae	Herbaceous	Maturity period	Later period	WUE	0.45	Heavy stress	21d	Medium-term stress	5	5	1.13	0.252676	1.37	0.306341
22	455	LUO Aihua, GUO Xianshi, CHAI Shouxi	2008	Journal of Gansu Agricultural University	35.4	104.6	Triticum aestivum L.	Monocotyledon	Graminae	Herbaceous	Tasseling stage	Mid period	WUE	0.45	Heavy stress	21d	Medium-term stress	5	5	1.45	0.32423	1.3	0.290689
22	456	LUO Aihua, GUO Xianshi, CHAI Shouxi	2008	Journal of Gansu Agricultural University	35.4	104.6	Triticum aestivum L.	Monocotyledon	Graminae	Herbaceous	Tasseling stage	Mid period	WUE	0.45	Heavy stress	21d	Medium-term stress	5	5	1.34	0.299633	1.3	0.290689
22	457	LUO Aihua, GUO Xianshi, CHAI Shouxi	2008	Journal of Gansu Agricultural University	35.4	104.6	Triticum aestivum L.	Monocotyledon	Graminae	Herbaceous	Tasseling stage	Mid period	WUE	0.45	Heavy stress	21d	Medium-term stress	5	5	1.08	0.241495	1.37	0.306341
22	458	LUO Aihua, GUO Xianshi, CHAI Shouxi	2008	Journal of Gansu Agricultural University	35.4	104.6	Triticum aestivum L.	Monocotyledon	Graminae	Herbaceous	Maturity period	Later period	WUE	0.45	Heavy stress	21d	Medium-term stress	5	5	1.33	0.297397	2.05	0.458394
22	459	LUO Aihua, GUO Xianshi, CHAI Shouxi	2008	Journal of Gansu Agricultural University	35.4	104.6	Triticum aestivum L.	Monocotyledon	Graminae	Herbaceous	Maturity period	Later period	WUE	0.45	Heavy stress	21d	Medium-term stress	5	5	2.12	0.474046	2.31	0.516532
22	460	LUO Aihua, GUO Xianshi, CHAI Shouxi	2008	Journal of Gansu Agricultural University	35.4	104.6	Triticum aestivum L.	Monocotyledon	Graminae	Herbaceous	Maturity period	Later period	WUE	0.45	Heavy stress	21d	Medium-term stress	5	5	1.29	0.288453	1.41	0.315286
22	461	LUO Aihua, GUO Xianshi, CHAI Shouxi	2008	Journal of Gansu Agricultural University	35.4	104.6	Triticum aestivum L.	Monocotyledon	Graminae	Herbaceous	Tasseling stage	Mid period	WUE	0.45	Heavy stress	21d	Medium-term stress	5	5	1.83	0.4092	2.05	0.458394
22	462	LUO Aihua, GUO Xianshi, CHAI Shouxi	2008	Journal of Gansu Agricultural University	35.4	104.6	Triticum aestivum L.	Monocotyledon	Graminae	Herbaceous	Tasseling stage	Mid period	WUE	0.45	Heavy stress	21d	Medium-term stress	5	5	2.23	0.498643	2.31	0.516532
22	463	LUO Aihua, GUO Xianshi, CHAI Shouxi	2008	Journal of Gansu Agricultural University	35.4	104.6	Triticum aestivum L.	Monocotyledon	Graminae	Herbaceous	Tasseling stage	Mid period	WUE	0.45	Heavy stress	21d	Medium-term stress	5	5	1.48	0.330938	1.41	0.315286
22	464	LUO Aihua, GUO Xianshi, CHAI Shouxi	2008	Journal of Gansu Agricultural University	35.4	104.6	Triticum aestivum L.	Monocotyledon	Graminae	Herbaceous	Maturity period	Later period	WUE	0.45	Heavy stress	21d	Medium-term stress	5	5	1.35	0.301869	1.62	0.362243
22	465	LUO Aihua, GUO Xianshi, CHAI Shouxi	2008	Journal of Gansu Agricultural University	35.4	104.6	Triticum aestivum L.	Monocotyledon	Graminae	Herbaceous	Maturity period	Later period	WUE	0.45	Heavy stress	21d	Medium-term stress	5	5	2	0.447214	2.09	0.467338
22	466	LUO Aihua, GUO Xianshi, CHAI Shouxi	2008	Journal of Gansu Agricultural University	35.4	104.6	Triticum aestivum L.	Monocotyledon	Graminae	Herbaceous	Maturity period	Later period	WUE	0.45	Heavy stress	21d	Medium-term stress	5	5	1.86	0.415909	2.3	0.514296
22	467	LUO Aihua, GUO Xianshi, CHAI Shouxi	2008	Journal of Gansu Agricultural University	35.4	104.6	Triticum aestivum L.	Monocotyledon	Graminae	Herbaceous	Tasseling stage	Mid period	WUE	0.45	Heavy stress	21d	Medium-term stress	5	5	1.4	0.31305	1.62	0.362243
22	468	LUO Aihua, GUO Xianshi, CHAI Shouxi	2008	Journal of Gansu Agricultural University	35.4	104.6	Triticum aestivum L.	Monocotyledon	Graminae	Herbaceous	Tasseling stage	Mid period	WUE	0.45	Heavy stress	21d	Medium-term stress	5	5	2.21	0.494171	2.09	0.467338
22	469	LUO Aihua, GUO Xianshi, CHAI Shouxi	2008	Journal of Gansu Agricultural University	35.4	104.6	Triticum aestivum L.	Monocotyledon	Graminae	Herbaceous	Tasseling stage	Mid period	WUE	0.45	Heavy stress	21d	Medium-term stress	5	5	1.91	0.427089	2.3	0.514296
23	470	REN Chuanyou, JIANG Zhuoqun, SU Xiaoxuan, MI Qianchuan, WANG Jiang, LI Yue, GAO Xining	2021	Chinese Journal of Applied Ecology	123.576	41.8327	Setaria italica	Monocotyledon	Graminae	Herbaceous	Maturity period	Later period	Yield	0.45	Heavy stress	7d	Short-term coercion	3	3	5050.25	626.672	5155.78	835.562
23	471	REN Chuanyou, JIANG Zhuoqun, SU Xiaoxuan, MI Qianchuan, WANG Jiang, LI Yue, GAO Xining	2021	Chinese Journal of Applied Ecology	123.576	41.8327	Setaria italica	Monocotyledon	Graminae	Herbaceous	Maturity period	Later period	Yield	0.45	Heavy stress	14d	Short-term coercion	3	3	4763.82	626.672	5155.78	835.562
23	472	REN Chuanyou, JIANG Zhuoqun, SU Xiaoxuan, MI Qianchuan, WANG Jiang, LI Yue, GAO Xining	2021	Chinese Journal of Applied Ecology	123.576	41.8327	Setaria italica	Monocotyledon	Graminae	Herbaceous	Maturity period	Later period	Yield	0.45	Heavy stress	21d	Medium-term stress	3	3	4356.78	835.562	5155.78	835.562
23	473	REN Chuanyou, JIANG Zhuoqun, SU Xiaoxuan, MI Qianchuan, WANG Jiang, LI Yue, GAO Xining	2021	Chinese Journal of Applied Ecology	123.576	41.8327	Setaria italica	Monocotyledon	Graminae	Herbaceous	Maturity period	Later period	Yield	0.55	Medium stress	7d	Short-term coercion	3	3	4809.05	940.007	5155.78	835.562
23	474	REN Chuanyou, JIANG Zhuoqun, SU Xiaoxuan, MI Qianchuan, WANG Jiang, LI Yue, GAO Xining	2021	Chinese Journal of Applied Ecology	123.576	41.8327	Setaria italica	Monocotyledon	Graminae	Herbaceous	Maturity period	Later period	Yield	0.55	Medium stress	14d	Short-term coercion	3	3	4462.31	156.668	5155.78	835.562
23	475	REN Chuanyou, JIANG Zhuoqun, SU Xiaoxuan, MI Qianchuan, WANG Jiang, LI Yue, GAO Xining	2021	Chinese Journal of Applied Ecology	123.576	41.8327	Setaria italica	Monocotyledon	Graminae	Herbaceous	Maturity period	Later period	Yield	0.55	Medium stress	21d	Medium-term stress	3	3	3467.34	678.894	5155.78	835.562
23	476	REN Chuanyou, JIANG Zhuoqun, SU Xiaoxuan, MI Qianchuan, WANG Jiang, LI Yue, GAO Xining	2021	Chinese Journal of Applied Ecology	123.576	41.8327	Setaria italica	Monocotyledon	Graminae	Herbaceous	Period of grouting	Mid period	Yield	0.45	Heavy stress	7d	Short-term coercion	3	3	4643.22	783.34	5155.78	835.562
23	477	REN Chuanyou, JIANG Zhuoqun, SU Xiaoxuan, MI Qianchuan, WANG Jiang, LI Yue, GAO Xining	2021	Chinese Journal of Applied Ecology	123.576	41.8327	Setaria italica	Monocotyledon	Graminae	Herbaceous	Period of grouting	Mid period	Yield	0.45	Heavy stress	14d	Short-term coercion	3	3	3979.9	313.336	5155.78	835.562
23	478	REN Chuanyou, JIANG Zhuoqun, SU Xiaoxuan, MI Qianchuan, WANG Jiang, LI Yue, GAO Xining	2021	Chinese Journal of Applied Ecology	123.576	41.8327	Setaria italica	Monocotyledon	Graminae	Herbaceous	Period of grouting	Mid period	Yield	0.45	Heavy stress	21d	Medium-term stress	3	3	3768.84	626.672	5155.78	835.562
23	479	REN Chuanyou, JIANG Zhuoqun, SU Xiaoxuan, MI Qianchuan, WANG Jiang, LI Yue, GAO Xining	2021	Chinese Journal of Applied Ecology	123.576	41.8327	Setaria italica	Monocotyledon	Graminae	Herbaceous	Period of grouting	Mid period	Yield	0.55	Medium stress	7d	Short-term coercion	3	3	4522.61	626.672	5155.78	835.562
23	480	REN Chuanyou, JIANG Zhuoqun, SU Xiaoxuan, MI Qianchuan, WANG Jiang, LI Yue, GAO Xining	2021	Chinese Journal of Applied Ecology	123.576	41.8327	Setaria italica	Monocotyledon	Graminae	Herbaceous	Period of grouting	Mid period	Yield	0.55	Medium stress	14d	Short-term coercion	3	3	3723.62	783.34	5155.78	835.562
23	481	REN Chuanyou, JIANG Zhuoqun, SU Xiaoxuan, MI Qianchuan, WANG Jiang, LI Yue, GAO Xining	2021	Chinese Journal of Applied Ecology	123.576	41.8327	Setaria italica	Monocotyledon	Graminae	Herbaceous	Period of grouting	Mid period	Yield	0.55	Medium stress	21d	Medium-term stress	3	3	2396.98	522.226	5155.78	835.562
24	482	GUO Yangbo, FENG Hao, WU Pute	2008	Jouranl of Irrigation and Drainage	108.082	34.2803	Solanum lycopersicum	Dicotyledons	Solanaceae	Herbaceous	Seedling stage	Preceding period	Yield	0.5	Medium stress	27d	Medium-term stress	3	3	13.01	2.2534	13.33	2.30882
24	483	GUO Yangbo, FENG Hao, WU Pute	2008	Jouranl of Irrigation and Drainage	108.082	34.2803	Solanum lycopersicum	Dicotyledons	Solanaceae	Herbaceous	Seedling stage	Preceding period	Yield	0.5	Medium stress	27d	Medium-term stress	3	3	13.32	2.30709	13.33	2.30882
24	484	GUO Yangbo, FENG Hao, WU Pute	2008	Jouranl of Irrigation and Drainage	108.082	34.2803	Solanum lycopersicum	Dicotyledons	Solanaceae	Herbaceous	Seedling stage	Preceding period	Yield	0.5	Medium stress	27d	Medium-term stress	3	3	9.57	1.65757	13.33	2.30882
24	485	GUO Yangbo, FENG Hao, WU Pute	2008	Jouranl of Irrigation and Drainage	108.082	34.2803	Solanum lycopersicum	Dicotyledons	Solanaceae	Herbaceous	The flowering period	Mid period	Yield	0.6	Medium stress	49d	Long-term stress	3	3	12.25	2.12176	13.33	2.30882
24	486	GUO Yangbo, FENG Hao, WU Pute	2008	Jouranl of Irrigation and Drainage	108.082	34.2803	Solanum lycopersicum	Dicotyledons	Solanaceae	Herbaceous	The flowering period	Mid period	Yield	0.6	Medium stress	49d	Long-term stress	3	3	12.86	2.22742	13.33	2.30882
24	487	GUO Yangbo, FENG Hao, WU Pute	2008	Jouranl of Irrigation and Drainage	108.082	34.2803	Solanum lycopersicum	Dicotyledons	Solanaceae	Herbaceous	The flowering period	Mid period	Yield	0.6	Medium stress	49d	Long-term stress	3	3	12	2.07846	13.33	2.30882
24	488	GUO Yangbo, FENG Hao, WU Pute	2008	Jouranl of Irrigation and Drainage	108.082	34.2803	Solanum lycopersicum	Dicotyledons	Solanaceae	Herbaceous	Fruiting season	Later period	Yield	0.75	Mild stress	76d	Long-term stress	3	3	12.53	2.17026	13.33	2.30882
24	489	GUO Yangbo, FENG Hao, WU Pute	2008	Jouranl of Irrigation and Drainage	108.082	34.2803	Solanum lycopersicum	Dicotyledons	Solanaceae	Herbaceous	Fruiting season	Later period	Yield	0.75	Mild stress	76d	Long-term stress	3	3	12.39	2.14601	13.33	2.30882
24	490	GUO Yangbo, FENG Hao, WU Pute	2008	Jouranl of Irrigation and Drainage	108.082	34.2803	Solanum lycopersicum	Dicotyledons	Solanaceae	Herbaceous	Fruiting season	Later period	Yield	0.75	Mild stress	76d	Long-term stress	3	3	10.72	1.85676	13.33	2.30882
24	491	GUO Yangbo, FENG Hao, WU Pute	2008	Jouranl of Irrigation and Drainage	108.082	34.2803	Solanum lycopersicum	Dicotyledons	Solanaceae	Herbaceous	Seedling stage	Preceding period	WUE	0.5	Medium stress	27d	Medium-term stress	3	3	35.83	6.20594	31.45	5.4473
24	492	GUO Yangbo, FENG Hao, WU Pute	2008	Jouranl of Irrigation and Drainage	108.082	34.2803	Solanum lycopersicum	Dicotyledons	Solanaceae	Herbaceous	Seedling stage	Preceding period	WUE	0.5	Medium stress	27d	Medium-term stress	3	3	38.05	6.59045	31.45	5.4473
24	493	GUO Yangbo, FENG Hao, WU Pute	2008	Jouranl of Irrigation and Drainage	108.082	34.2803	Solanum lycopersicum	Dicotyledons	Solanaceae	Herbaceous	Seedling stage	Preceding period	WUE	0.5	Medium stress	27d	Medium-term stress	3	3	34.47	5.97038	31.45	5.4473
24	494	GUO Yangbo, FENG Hao, WU Pute	2008	Jouranl of Irrigation and Drainage	108.082	34.2803	Solanum lycopersicum	Dicotyledons	Solanaceae	Herbaceous	The flowering period	Mid period	WUE	0.6	Medium stress	49d	Long-term stress	3	3	30.82	5.33818	31.45	5.4473
24	495	GUO Yangbo, FENG Hao, WU Pute	2008	Jouranl of Irrigation and Drainage	108.082	34.2803	Solanum lycopersicum	Dicotyledons	Solanaceae	Herbaceous	The flowering period	Mid period	WUE	0.6	Medium stress	49d	Long-term stress	3	3	29.45	5.10089	31.45	5.4473
24	496	GUO Yangbo, FENG Hao, WU Pute	2008	Jouranl of Irrigation and Drainage	108.082	34.2803	Solanum lycopersicum	Dicotyledons	Solanaceae	Herbaceous	The flowering period	Mid period	WUE	0.6	Medium stress	49d	Long-term stress	3	3	34.02	5.89244	31.45	5.4473
24	497	GUO Yangbo, FENG Hao, WU Pute	2008	Jouranl of Irrigation and Drainage	108.082	34.2803	Solanum lycopersicum	Dicotyledons	Solanaceae	Herbaceous	Fruiting season	Later period	WUE	0.75	Mild stress	76d	Long-term stress	3	3	28.64	4.96059	31.45	5.4473
24	498	GUO Yangbo, FENG Hao, WU Pute	2008	Jouranl of Irrigation and Drainage	108.082	34.2803	Solanum lycopersicum	Dicotyledons	Solanaceae	Herbaceous	Fruiting season	Later period	WUE	0.75	Mild stress	76d	Long-term stress	3	3	30.02	5.19962	31.45	5.4473
24	499	GUO Yangbo, FENG Hao, WU Pute	2008	Jouranl of Irrigation and Drainage	108.082	34.2803	Solanum lycopersicum	Dicotyledons	Solanaceae	Herbaceous	Fruiting season	Later period	WUE	0.75	Mild stress	76d	Long-term stress	3	3	33.4	5.78505	31.45	5.4473
24	500	GUO Yangbo, FENG Hao, WU Pute	2008	Jouranl of Irrigation and Drainage	108.082	34.2803	Solanum lycopersicum	Dicotyledons	Solanaceae	Herbaceous	Seedling stage	Preceding period	Pn	0.5	Medium stress	27d	Medium-term stress	3	3	8.36	1.44799	7.535	1.3051
24	501	GUO Yangbo, FENG Hao, WU Pute	2008	Jouranl of Irrigation and Drainage	108.082	34.2803	Solanum lycopersicum	Dicotyledons	Solanaceae	Herbaceous	Seedling stage	Preceding period	Pn	0.5	Medium stress	27d	Medium-term stress	3	3	7.18	1.24361	7.535	1.3051
24	502	GUO Yangbo, FENG Hao, WU Pute	2008	Jouranl of Irrigation and Drainage	108.082	34.2803	Solanum lycopersicum	Dicotyledons	Solanaceae	Herbaceous	Seedling stage	Preceding period	Pn	0.5	Medium stress	27d	Medium-term stress	3	3	6.57	1.13796	7.535	1.3051
24	503	GUO Yangbo, FENG Hao, WU Pute	2008	Jouranl of Irrigation and Drainage	108.082	34.2803	Solanum lycopersicum	Dicotyledons	Solanaceae	Herbaceous	The flowering period	Mid period	Pn	0.6	Medium stress	49d	Long-term stress	3	3	8.005	1.38651	7.535	1.3051
24	504	GUO Yangbo, FENG Hao, WU Pute	2008	Jouranl of Irrigation and Drainage	108.082	34.2803	Solanum lycopersicum	Dicotyledons	Solanaceae	Herbaceous	The flowering period	Mid period	Pn	0.6	Medium stress	49d	Long-term stress	3	3	4.89	0.846973	7.535	1.3051
24	505	GUO Yangbo, FENG Hao, WU Pute	2008	Jouranl of Irrigation and Drainage	108.082	34.2803	Solanum lycopersicum	Dicotyledons	Solanaceae	Herbaceous	The flowering period	Mid period	Pn	0.6	Medium stress	49d	Long-term stress	3	3	8.3	1.4376	7.535	1.3051
24	506	GUO Yangbo, FENG Hao, WU Pute	2008	Jouranl of Irrigation and Drainage	108.082	34.2803	Solanum lycopersicum	Dicotyledons	Solanaceae	Herbaceous	Fruiting season	Later period	Pn	0.75	Mild stress	76d	Long-term stress	3	3	7.55	1.3077	7.535	1.3051
24	507	GUO Yangbo, FENG Hao, WU Pute	2008	Jouranl of Irrigation and Drainage	108.082	34.2803	Solanum lycopersicum	Dicotyledons	Solanaceae	Herbaceous	Fruiting season	Later period	Pn	0.75	Mild stress	76d	Long-term stress	3	3	3.905	0.676366	7.535	1.3051
24	508	GUO Yangbo, FENG Hao, WU Pute	2008	Jouranl of Irrigation and Drainage	108.082	34.2803	Solanum lycopersicum	Dicotyledons	Solanaceae	Herbaceous	Fruiting season	Later period	Pn	0.75	Mild stress	76d	Long-term stress	3	3	7.065	1.22369	7.535	1.3051
24	509	GUO Yangbo, FENG Hao, WU Pute	2008	Jouranl of Irrigation and Drainage	108.082	34.2803	Solanum lycopersicum	Dicotyledons	Solanaceae	Herbaceous	Seedling stage	Preceding period	Tr	0.5	Medium stress	27d	Medium-term stress	3	3	3.905	0.676366	3.27	0.566381
24	510	GUO Yangbo, FENG Hao, WU Pute	2008	Jouranl of Irrigation and Drainage	108.082	34.2803	Solanum lycopersicum	Dicotyledons	Solanaceae	Herbaceous	Seedling stage	Preceding period	Tr	0.5	Medium stress	27d	Medium-term stress	3	3	3.14	0.543864	3.27	0.566381
24	511	GUO Yangbo, FENG Hao, WU Pute	2008	Jouranl of Irrigation and Drainage	108.082	34.2803	Solanum lycopersicum	Dicotyledons	Solanaceae	Herbaceous	Seedling stage	Preceding period	Tr	0.5	Medium stress	27d	Medium-term stress	3	3	3.23	0.559452	3.27	0.566381
24	512	GUO Yangbo, FENG Hao, WU Pute	2008	Jouranl of Irrigation and Drainage	108.082	34.2803	Solanum lycopersicum	Dicotyledons	Solanaceae	Herbaceous	The flowering period	Mid period	Tr	0.6	Medium stress	49d	Long-term stress	3	3	3.905	0.676366	3.27	0.566381
24	513	GUO Yangbo, FENG Hao, WU Pute	2008	Jouranl of Irrigation and Drainage	108.082	34.2803	Solanum lycopersicum	Dicotyledons	Solanaceae	Herbaceous	The flowering period	Mid period	Tr	0.6	Medium stress	49d	Long-term stress	3	3	3.58	0.620074	3.27	0.566381
24	514	GUO Yangbo, FENG Hao, WU Pute	2008	Jouranl of Irrigation and Drainage	108.082	34.2803	Solanum lycopersicum	Dicotyledons	Solanaceae	Herbaceous	The flowering period	Mid period	Tr	0.6	Medium stress	49d	Long-term stress	3	3	3.315	0.574175	3.27	0.566381
24	515	GUO Yangbo, FENG Hao, WU Pute	2008	Jouranl of Irrigation and Drainage	108.082	34.2803	Solanum lycopersicum	Dicotyledons	Solanaceae	Herbaceous	Fruiting season	Later period	Tr	0.75	Mild stress	76d	Long-term stress	3	3	2.61	0.452065	3.27	0.566381
24	516	GUO Yangbo, FENG Hao, WU Pute	2008	Jouranl of Irrigation and Drainage	108.082	34.2803	Solanum lycopersicum	Dicotyledons	Solanaceae	Herbaceous	Fruiting season	Later period	Tr	0.75	Mild stress	76d	Long-term stress	3	3	2.645	0.458127	3.27	0.566381
24	517	GUO Yangbo, FENG Hao, WU Pute	2008	Jouranl of Irrigation and Drainage	108.082	34.2803	Solanum lycopersicum	Dicotyledons	Solanaceae	Herbaceous	Fruiting season	Later period	Tr	0.75	Mild stress	76d	Long-term stress	3	3	3.345	0.579371	3.27	0.566381
25	518	ZHANG Jibo, XUE Xiaoping, ZHANG Xinguang, QIU Cui, TAN Fangyi, LI Nan	2023	Journal of Arid Meteorology	118.255	35.4748	Triticum aestivum L.	Monocotyledon	Graminae	Herbaceous	Jointing stage	Preceding period	Apparent quantum efficiency	0.8	Mild stress	27d	Medium-term stress	3	3	17.8	2.65	17.1	3.41
25	519	ZHANG Jibo, XUE Xiaoping, ZHANG Xinguang, QIU Cui, TAN Fangyi, LI Nan	2023	Journal of Arid Meteorology	118.255	35.4748	Triticum aestivum L.	Monocotyledon	Graminae	Herbaceous	Jointing stage	Preceding period	Apparent quantum efficiency	0.5	Medium stress	27d	Medium-term stress	3	3	17.54	3.19	17.1	3.41
25	520	ZHANG Jibo, XUE Xiaoping, ZHANG Xinguang, QIU Cui, TAN Fangyi, LI Nan	2023	Journal of Arid Meteorology	118.255	35.4748	Triticum aestivum L.	Monocotyledon	Graminae	Herbaceous	Jointing stage	Preceding period	Apparent quantum efficiency	0.25	Heavy stress	27d	Medium-term stress	3	3	14.79	2.46	17.1	3.41
25	521	ZHANG Jibo, XUE Xiaoping, ZHANG Xinguang, QIU Cui, TAN Fangyi, LI Nan	2023	Journal of Arid Meteorology	118.255	35.4748	Triticum aestivum L.	Monocotyledon	Graminae	Herbaceous	Jointing stage	Preceding period	Light saturation point	0.8	Mild stress	27d	Medium-term stress	3	3	1327.4	197.8	1446.4	288.04
25	522	ZHANG Jibo, XUE Xiaoping, ZHANG Xinguang, QIU Cui, TAN Fangyi, LI Nan	2023	Journal of Arid Meteorology	118.255	35.4748	Triticum aestivum L.	Monocotyledon	Graminae	Herbaceous	Jointing stage	Preceding period	Light saturation point	0.5	Medium stress	27d	Medium-term stress	3	3	1312.6	238.677	1446.4	288.04
25	523	ZHANG Jibo, XUE Xiaoping, ZHANG Xinguang, QIU Cui, TAN Fangyi, LI Nan	2023	Journal of Arid Meteorology	118.255	35.4748	Triticum aestivum L.	Monocotyledon	Graminae	Herbaceous	Jointing stage	Preceding period	Light saturation point	0.25	Heavy stress	27d	Medium-term stress	3	3	1137.4	189.14	1446.4	288.04
25	524	ZHANG Jibo, XUE Xiaoping, ZHANG Xinguang, QIU Cui, TAN Fangyi, LI Nan	2023	Journal of Arid Meteorology	118.255	35.4748	Triticum aestivum L.	Monocotyledon	Graminae	Herbaceous	Jointing stage	Preceding period	Optical compensation point	0.8	Mild stress	27d	Medium-term stress	3	3	71.9	10.7041	66.6	13.2675
25	525	ZHANG Jibo, XUE Xiaoping, ZHANG Xinguang, QIU Cui, TAN Fangyi, LI Nan	2023	Journal of Arid Meteorology	118.255	35.4748	Triticum aestivum L.	Monocotyledon	Graminae	Herbaceous	Jointing stage	Preceding period	Optical compensation point	0.5	Medium stress	27d	Medium-term stress	3	3	73.7	13.4061	66.6	13.2675
25	526	ZHANG Jibo, XUE Xiaoping, ZHANG Xinguang, QIU Cui, TAN Fangyi, LI Nan	2023	Journal of Arid Meteorology	118.255	35.4748	Triticum aestivum L.	Monocotyledon	Graminae	Herbaceous	Jointing stage	Preceding period	Optical compensation point	0.25	Heavy stress	27d	Medium-term stress	3	3	92.5	15.294	66.6	13.2675
25	527	ZHANG Jibo, XUE Xiaoping, ZHANG Xinguang, QIU Cui, TAN Fangyi, LI Nan	2023	Journal of Arid Meteorology	118.255	35.4748	Triticum aestivum L.	Monocotyledon	Graminae	Herbaceous	Jointing stage	Preceding period	Yield	0.8	Mild stress	27d	Medium-term stress	3	3	0.620773	0.117144	0.826087	0.167348
25	528	ZHANG Jibo, XUE Xiaoping, ZHANG Xinguang, QIU Cui, TAN Fangyi, LI Nan	2023	Journal of Arid Meteorology	118.255	35.4748	Triticum aestivum L.	Monocotyledon	Graminae	Herbaceous	Jointing stage	Preceding period	Yield	0.5	Medium stress	27d	Medium-term stress	3	3	0.536232	0.0920413	0.826087	0.167348
25	529	ZHANG Jibo, XUE Xiaoping, ZHANG Xinguang, QIU Cui, TAN Fangyi, LI Nan	2023	Journal of Arid Meteorology	118.255	35.4748	Triticum aestivum L.	Monocotyledon	Graminae	Herbaceous	Jointing stage	Preceding period	Yield	0.25	Heavy stress	27d	Medium-term stress	3	3	0.425121	0.0753066	0.826087	0.167348
25	530	ZHANG Jibo, XUE Xiaoping, ZHANG Xinguang, QIU Cui, TAN Fangyi, LI Nan	2023	Journal of Arid Meteorology	118.255	35.4748	Triticum aestivum L.	Monocotyledon	Graminae	Herbaceous	Jointing stage	Preceding period	Starch	0.8	Mild stress	27d	Medium-term stress	3	3	55.2419	11.1745	50.4032	9.77771
25	531	ZHANG Jibo, XUE Xiaoping, ZHANG Xinguang, QIU Cui, TAN Fangyi, LI Nan	2023	Journal of Arid Meteorology	118.255	35.4748	Triticum aestivum L.	Monocotyledon	Graminae	Herbaceous	Jointing stage	Preceding period	Starch	0.5	Medium stress	27d	Medium-term stress	3	3	56.4516	9.77771	50.4032	9.77771
25	532	ZHANG Jibo, XUE Xiaoping, ZHANG Xinguang, QIU Cui, TAN Fangyi, LI Nan	2023	Journal of Arid Meteorology	118.255	35.4748	Triticum aestivum L.	Monocotyledon	Graminae	Herbaceous	Jointing stage	Preceding period	Starch	0.25	Heavy stress	27d	Medium-term stress	3	3	61.2903	9.77771	50.4032	9.77771
25	533	ZHANG Jibo, XUE Xiaoping, ZHANG Xinguang, QIU Cui, TAN Fangyi, LI Nan	2023	Journal of Arid Meteorology	118.255	35.4748	Triticum aestivum L.	Monocotyledon	Graminae	Herbaceous	Jointing stage	Preceding period	Carbohydrate	0.8	Mild stress	27d	Medium-term stress	3	3	2.57085	0.420741	2.83401	0.560988
25	534	ZHANG Jibo, XUE Xiaoping, ZHANG Xinguang, QIU Cui, TAN Fangyi, LI Nan	2023	Journal of Arid Meteorology	118.255	35.4748	Triticum aestivum L.	Monocotyledon	Graminae	Herbaceous	Jointing stage	Preceding period	Carbohydrate	0.5	Medium stress	27d	Medium-term stress	3	3	2.46964	0.420741	2.83401	0.560988
25	535	ZHANG Jibo, XUE Xiaoping, ZHANG Xinguang, QIU Cui, TAN Fangyi, LI Nan	2023	Journal of Arid Meteorology	118.255	35.4748	Triticum aestivum L.	Monocotyledon	Graminae	Herbaceous	Jointing stage	Preceding period	Carbohydrate	0.25	Heavy stress	27d	Medium-term stress	3	3	2.06478	0.350618	2.83401	0.560988
26	536	LI Shuxing, GUO Hui, LI Min, TU Min, WANG Lili, MA Jun, WANG Mingtian	2014	Acta Agriculturae Boreali-Sinica	106.668	26.5142	Oryza sativa L.	Monocotyledon	Graminae	Herbaceous	Seedling stage	Preceding period	Yield	-25kPa	Medium stress	7d	Short-term coercion	5	5	924.78	206.787	847.33	189.469
26	537	LI Shuxing, GUO Hui, LI Min, TU Min, WANG Lili, MA Jun, WANG Mingtian	2014	Acta Agriculturae Boreali-Sinica	106.668	26.5142	Oryza sativa L.	Monocotyledon	Graminae	Herbaceous	Seedling stage	Preceding period	Yield	-25kPa	Medium stress	14d	Short-term coercion	5	5	722.8	161.623	847.33	189.469
26	538	LI Shuxing, GUO Hui, LI Min, TU Min, WANG Lili, MA Jun, WANG Mingtian	2014	Acta Agriculturae Boreali-Sinica	106.668	26.5142	Oryza sativa L.	Monocotyledon	Graminae	Herbaceous	Seedling stage	Preceding period	Yield	-50kPa	Heavy stress	7d	Short-term coercion	5	5	663.26	148.309	847.33	189.469
26	539	LI Shuxing, GUO Hui, LI Min, TU Min, WANG Lili, MA Jun, WANG Mingtian	2014	Acta Agriculturae Boreali-Sinica	106.668	26.5142	Oryza sativa L.	Monocotyledon	Graminae	Herbaceous	Seedling stage	Preceding period	Yield	-50kPa	Heavy stress	14d	Short-term coercion	5	5	572.86	128.095	847.33	189.469
26	540	LI Shuxing, GUO Hui, LI Min, TU Min, WANG Lili, MA Jun, WANG Mingtian	2014	Acta Agriculturae Boreali-Sinica	106.668	26.5142	Oryza sativa L.	Monocotyledon	Graminae	Herbaceous	Seedling stage	Preceding period	Soluble sugar	-25kPa	Medium stress	7d	Short-term coercion	3	3	67.3684	11.6686	71.1962	12.3315
26	541	LI Shuxing, GUO Hui, LI Min, TU Min, WANG Lili, MA Jun, WANG Mingtian	2014	Acta Agriculturae Boreali-Sinica	106.668	26.5142	Oryza sativa L.	Monocotyledon	Graminae	Herbaceous	Seedling stage	Preceding period	Soluble sugar	-25kPa	Medium stress	14d	Short-term coercion	3	3	75.9358	13.1525	70.5882	12.2262
26	542	LI Shuxing, GUO Hui, LI Min, TU Min, WANG Lili, MA Jun, WANG Mingtian	2014	Acta Agriculturae Boreali-Sinica	106.668	26.5142	Oryza sativa L.	Monocotyledon	Graminae	Herbaceous	Seedling stage	Preceding period	Soluble sugar	-50kPa	Heavy stress	7d	Short-term coercion	3	3	63.5407	11.0056	71.1962	12.3315
26	543	LI Shuxing, GUO Hui, LI Min, TU Min, WANG Lili, MA Jun, WANG Mingtian	2014	Acta Agriculturae Boreali-Sinica	106.668	26.5142	Oryza sativa L.	Monocotyledon	Graminae	Herbaceous	Seedling stage	Preceding period	Soluble sugar	-50kPa	Heavy stress	14d	Short-term coercion	3	3	81.2834	14.0787	70.5882	12.2262
26	544	LI Shuxing, GUO Hui, LI Min, TU Min, WANG Lili, MA Jun, WANG Mingtian	2014	Acta Agriculturae Boreali-Sinica	106.668	26.5142	Oryza sativa L.	Monocotyledon	Graminae	Herbaceous	Seedling stage	Preceding period	Proline	-25kPa	Medium stress	7d	Short-term coercion	3	3	23.0337	3.98956	26.9663	4.6707
26	545	LI Shuxing, GUO Hui, LI Min, TU Min, WANG Lili, MA Jun, WANG Mingtian	2014	Acta Agriculturae Boreali-Sinica	106.668	26.5142	Oryza sativa L.	Monocotyledon	Graminae	Herbaceous	Seedling stage	Preceding period	Proline	-25kPa	Medium stress	14d	Short-term coercion	3	3	31.5152	5.45858	35.1515	6.08842
26	546	LI Shuxing, GUO Hui, LI Min, TU Min, WANG Lili, MA Jun, WANG Mingtian	2014	Acta Agriculturae Boreali-Sinica	106.668	26.5142	Oryza sativa L.	Monocotyledon	Graminae	Herbaceous	Seedling stage	Preceding period	Proline	-50kPa	Heavy stress	7d	Short-term coercion	3	3	31.4607	5.44915	26.9663	4.6707
26	547	LI Shuxing, GUO Hui, LI Min, TU Min, WANG Lili, MA Jun, WANG Mingtian	2014	Acta Agriculturae Boreali-Sinica	106.668	26.5142	Oryza sativa L.	Monocotyledon	Graminae	Herbaceous	Seedling stage	Preceding period	Proline	-50kPa	Heavy stress	14d	Short-term coercion	3	3	38.7879	6.71826	35.1515	6.08842
26	548	LI Shuxing, GUO Hui, LI Min, TU Min, WANG Lili, MA Jun, WANG Mingtian	2014	Acta Agriculturae Boreali-Sinica	106.668	26.5142	Oryza sativa L.	Monocotyledon	Graminae	Herbaceous	Seedling stage	Preceding period	SOD	-25kPa	Medium stress	7d	Short-term coercion	3	3	100	17.3205	109.756	19.0103
26	549	LI Shuxing, GUO Hui, LI Min, TU Min, WANG Lili, MA Jun, WANG Mingtian	2014	Acta Agriculturae Boreali-Sinica	106.668	26.5142	Oryza sativa L.	Monocotyledon	Graminae	Herbaceous	Seedling stage	Preceding period	SOD	-25kPa	Medium stress	14d	Short-term coercion	3	3	123	21.3042	111	19.2258
26	550	LI Shuxing, GUO Hui, LI Min, TU Min, WANG Lili, MA Jun, WANG Mingtian	2014	Acta Agriculturae Boreali-Sinica	106.668	26.5142	Oryza sativa L.	Monocotyledon	Graminae	Herbaceous	Seedling stage	Preceding period	SOD	-50kPa	Heavy stress	7d	Short-term coercion	3	3	118.293	20.4889	109.756	19.0103
26	551	LI Shuxing, GUO Hui, LI Min, TU Min, WANG Lili, MA Jun, WANG Mingtian	2014	Acta Agriculturae Boreali-Sinica	106.668	26.5142	Oryza sativa L.	Monocotyledon	Graminae	Herbaceous	Seedling stage	Preceding period	SOD	-50kPa	Heavy stress	14d	Short-term coercion	3	3	134	23.2095	111	19.2258
26	552	LI Shuxing, GUO Hui, LI Min, TU Min, WANG Lili, MA Jun, WANG Mingtian	2014	Acta Agriculturae Boreali-Sinica	106.668	26.5142	Oryza sativa L.	Monocotyledon	Graminae	Herbaceous	Seedling stage	Preceding period	POD	-25kPa	Medium stress	7d	Short-term coercion	3	3	5104.97	884.207	4138.12	716.744
26	553	LI Shuxing, GUO Hui, LI Min, TU Min, WANG Lili, MA Jun, WANG Mingtian	2014	Acta Agriculturae Boreali-Sinica	106.668	26.5142	Oryza sativa L.	Monocotyledon	Graminae	Herbaceous	Seedling stage	Preceding period	POD	-25kPa	Medium stress	14d	Short-term coercion	3	3	4443.18	769.582	4750	822.724
26	554	LI Shuxing, GUO Hui, LI Min, TU Min, WANG Lili, MA Jun, WANG Mingtian	2014	Acta Agriculturae Boreali-Sinica	106.668	26.5142	Oryza sativa L.	Monocotyledon	Graminae	Herbaceous	Seedling stage	Preceding period	POD	-50kPa	Heavy stress	7d	Short-term coercion	3	3	4602.21	797.126	4138.12	716.744
26	555	LI Shuxing, GUO Hui, LI Min, TU Min, WANG Lili, MA Jun, WANG Mingtian	2014	Acta Agriculturae Boreali-Sinica	106.668	26.5142	Oryza sativa L.	Monocotyledon	Graminae	Herbaceous	Seedling stage	Preceding period	POD	-50kPa	Heavy stress	14d	Short-term coercion	3	3	5397.73	934.914	4750	822.724
26	556	LI Shuxing, GUO Hui, LI Min, TU Min, WANG Lili, MA Jun, WANG Mingtian	2014	Acta Agriculturae Boreali-Sinica	106.668	26.5142	Oryza sativa L.	Monocotyledon	Graminae	Herbaceous	Seedling stage	Preceding period	CAT	-25kPa	Medium stress	7d	Short-term coercion	3	3	40.2985	6.97991	35.3731	6.12681
26	557	LI Shuxing, GUO Hui, LI Min, TU Min, WANG Lili, MA Jun, WANG Mingtian	2014	Acta Agriculturae Boreali-Sinica	106.668	26.5142	Oryza sativa L.	Monocotyledon	Graminae	Herbaceous	Seedling stage	Preceding period	CAT	-25kPa	Medium stress	14d	Short-term coercion	3	3	67.8049	11.7441	64.3902	11.1527
26	558	LI Shuxing, GUO Hui, LI Min, TU Min, WANG Lili, MA Jun, WANG Mingtian	2014	Acta Agriculturae Boreali-Sinica	106.668	26.5142	Oryza sativa L.	Monocotyledon	Graminae	Herbaceous	Seedling stage	Preceding period	CAT	-50kPa	Heavy stress	7d	Short-term coercion	3	3	50.1493	8.68611	35.3731	6.12681
26	559	LI Shuxing, GUO Hui, LI Min, TU Min, WANG Lili, MA Jun, WANG Mingtian	2014	Acta Agriculturae Boreali-Sinica	106.668	26.5142	Oryza sativa L.	Monocotyledon	Graminae	Herbaceous	Seedling stage	Preceding period	CAT	-50kPa	Heavy stress	14d	Short-term coercion	3	3	70.2439	12.1666	64.3902	11.1527
26	560	LI Shuxing, GUO Hui, LI Min, TU Min, WANG Lili, MA Jun, WANG Mingtian	2014	Acta Agriculturae Boreali-Sinica	106.668	26.5142	Oryza sativa L.	Monocotyledon	Graminae	Herbaceous	Seedling stage	Preceding period	MDA	-25kPa	Medium stress	7d	Short-term coercion	3	3	0.502326	0.0870053	0.544186	0.0942558
26	561	LI Shuxing, GUO Hui, LI Min, TU Min, WANG Lili, MA Jun, WANG Mingtian	2014	Acta Agriculturae Boreali-Sinica	106.668	26.5142	Oryza sativa L.	Monocotyledon	Graminae	Herbaceous	Seedling stage	Preceding period	MDA	-25kPa	Medium stress	14d	Short-term coercion	3	3	0.76	0.131636	0.68	0.117779
26	562	LI Shuxing, GUO Hui, LI Min, TU Min, WANG Lili, MA Jun, WANG Mingtian	2014	Acta Agriculturae Boreali-Sinica	106.668	26.5142	Oryza sativa L.	Monocotyledon	Graminae	Herbaceous	Seedling stage	Preceding period	MDA	-50kPa	Heavy stress	7d	Short-term coercion	3	3	0.613953	0.10634	0.544186	0.0942558
26	563	LI Shuxing, GUO Hui, LI Min, TU Min, WANG Lili, MA Jun, WANG Mingtian	2014	Acta Agriculturae Boreali-Sinica	106.668	26.5142	Oryza sativa L.	Monocotyledon	Graminae	Herbaceous	Seedling stage	Preceding period	MDA	-50kPa	Heavy stress	14d	Short-term coercion	3	3	0.826667	0.143183	0.68	0.117779
27	564	WEI Zhen, PENG Shizhang, KONG Weili, GAO Huanzhi	2010	Journal of Hohai University (Natural Sciences)	118.768	32.0606	Oryza sativa L.	Monocotyledon	Graminae	Herbaceous	Tillering stage	Preceding period	Dry matter	0.5	Medium stress	15d	Short-term coercion	6	6	69.13	16.9333	70.86	17.3571
27	565	WEI Zhen, PENG Shizhang, KONG Weili, GAO Huanzhi	2010	Journal of Hohai University (Natural Sciences)	118.768	32.0606	Oryza sativa L.	Monocotyledon	Graminae	Herbaceous	Jointing stage	Preceding period	Dry matter	0.65	Medium stress	15d	Short-term coercion	6	6	70.04	17.1562	70.86	17.3571
27	566	WEI Zhen, PENG Shizhang, KONG Weili, GAO Huanzhi	2010	Journal of Hohai University (Natural Sciences)	118.768	32.0606	Oryza sativa L.	Monocotyledon	Graminae	Herbaceous	Tasseling stage	Mid period	Dry matter	0.7	Mild stress	15d	Short-term coercion	6	6	64.49	15.7968	70.86	17.3571
27	567	WEI Zhen, PENG Shizhang, KONG Weili, GAO Huanzhi	2010	Journal of Hohai University (Natural Sciences)	118.768	32.0606	Oryza sativa L.	Monocotyledon	Graminae	Herbaceous	Tillering stage	Preceding period	Dry matter	0.4	Heavy stress	15d	Short-term coercion	6	6	61.69	15.1109	70.86	17.3571
27	568	WEI Zhen, PENG Shizhang, KONG Weili, GAO Huanzhi	2010	Journal of Hohai University (Natural Sciences)	118.768	32.0606	Oryza sativa L.	Monocotyledon	Graminae	Herbaceous	Jointing stage	Preceding period	Dry matter	0.55	Medium stress	15d	Short-term coercion	6	6	58.81	14.4054	70.86	17.3571
27	569	WEI Zhen, PENG Shizhang, KONG Weili, GAO Huanzhi	2010	Journal of Hohai University (Natural Sciences)	118.768	32.0606	Oryza sativa L.	Monocotyledon	Graminae	Herbaceous	Tasseling stage	Mid period	Dry matter	0.6	Medium stress	15d	Short-term coercion	6	6	56.18	13.7612	70.86	17.3571
27	570	WEI Zhen, PENG Shizhang, KONG Weili, GAO Huanzhi	2010	Journal of Hohai University (Natural Sciences)	118.768	32.0606	Oryza sativa L.	Monocotyledon	Graminae	Herbaceous	Tillering stage	Preceding period	Dry matter	0.5	Medium stress	15d	Short-term coercion	6	6	53.02	12.9872	54.74	13.4085
27	571	WEI Zhen, PENG Shizhang, KONG Weili, GAO Huanzhi	2010	Journal of Hohai University (Natural Sciences)	118.768	32.0606	Oryza sativa L.	Monocotyledon	Graminae	Herbaceous	Jointing stage	Preceding period	Dry matter	0.65	Medium stress	15d	Short-term coercion	6	6	51.94	12.7226	54.74	13.4085
27	572	WEI Zhen, PENG Shizhang, KONG Weili, GAO Huanzhi	2010	Journal of Hohai University (Natural Sciences)	118.768	32.0606	Oryza sativa L.	Monocotyledon	Graminae	Herbaceous	Tasseling stage	Mid period	Dry matter	0.7	Mild stress	15d	Short-term coercion	6	6	53.78	13.1734	54.74	13.4085
27	573	WEI Zhen, PENG Shizhang, KONG Weili, GAO Huanzhi	2010	Journal of Hohai University (Natural Sciences)	118.768	32.0606	Oryza sativa L.	Monocotyledon	Graminae	Herbaceous	Tillering stage	Preceding period	Dry matter	0.4	Heavy stress	15d	Short-term coercion	6	6	50.81	12.4459	54.74	13.4085
27	574	WEI Zhen, PENG Shizhang, KONG Weili, GAO Huanzhi	2010	Journal of Hohai University (Natural Sciences)	118.768	32.0606	Oryza sativa L.	Monocotyledon	Graminae	Herbaceous	Jointing stage	Preceding period	Dry matter	0.55	Medium stress	15d	Short-term coercion	6	6	46.49	11.3877	54.74	13.4085
27	575	WEI Zhen, PENG Shizhang, KONG Weili, GAO Huanzhi	2010	Journal of Hohai University (Natural Sciences)	118.768	32.0606	Oryza sativa L.	Monocotyledon	Graminae	Herbaceous	Tasseling stage	Mid period	Dry matter	0.6	Medium stress	15d	Short-term coercion	6	6	43.61	10.6822	54.74	13.4085
27	576	WEI Zhen, PENG Shizhang, KONG Weili, GAO Huanzhi	2010	Journal of Hohai University (Natural Sciences)	118.768	32.0606	Oryza sativa L.	Monocotyledon	Graminae	Herbaceous	Tillering stage	Preceding period	Yield	0.5	Medium stress	15d	Short-term coercion	6	6	18.55	4.5438	18.09	4.43113
27	577	WEI Zhen, PENG Shizhang, KONG Weili, GAO Huanzhi	2010	Journal of Hohai University (Natural Sciences)	118.768	32.0606	Oryza sativa L.	Monocotyledon	Graminae	Herbaceous	Jointing stage	Preceding period	Yield	0.65	Medium stress	15d	Short-term coercion	6	6	18.3	4.48257	18.09	4.43113
27	578	WEI Zhen, PENG Shizhang, KONG Weili, GAO Huanzhi	2010	Journal of Hohai University (Natural Sciences)	118.768	32.0606	Oryza sativa L.	Monocotyledon	Graminae	Herbaceous	Tasseling stage	Mid period	Yield	0.7	Mild stress	15d	Short-term coercion	6	6	18.01	4.41153	18.09	4.43113
27	579	WEI Zhen, PENG Shizhang, KONG Weili, GAO Huanzhi	2010	Journal of Hohai University (Natural Sciences)	118.768	32.0606	Oryza sativa L.	Monocotyledon	Graminae	Herbaceous	Tillering stage	Preceding period	Yield	0.4	Heavy stress	15d	Short-term coercion	6	6	17.89	4.38214	18.09	4.43113
27	580	WEI Zhen, PENG Shizhang, KONG Weili, GAO Huanzhi	2010	Journal of Hohai University (Natural Sciences)	118.768	32.0606	Oryza sativa L.	Monocotyledon	Graminae	Herbaceous	Jointing stage	Preceding period	Yield	0.55	Medium stress	15d	Short-term coercion	6	6	17.43	4.26946	18.09	4.43113
27	581	WEI Zhen, PENG Shizhang, KONG Weili, GAO Huanzhi	2010	Journal of Hohai University (Natural Sciences)	118.768	32.0606	Oryza sativa L.	Monocotyledon	Graminae	Herbaceous	Tasseling stage	Mid period	Yield	0.6	Medium stress	15d	Short-term coercion	6	6	16.72	4.09555	18.09	4.43113
27	582	WEI Zhen, PENG Shizhang, KONG Weili, GAO Huanzhi	2010	Journal of Hohai University (Natural Sciences)	118.768	32.0606	Oryza sativa L.	Monocotyledon	Graminae	Herbaceous	Tillering stage	Preceding period	Yield	0.5	Medium stress	15d	Short-term coercion	6	6	16.85	4.12739	16.43	4.02451
27	583	WEI Zhen, PENG Shizhang, KONG Weili, GAO Huanzhi	2010	Journal of Hohai University (Natural Sciences)	118.768	32.0606	Oryza sativa L.	Monocotyledon	Graminae	Herbaceous	Tasseling stage	Mid period	Yield	0.7	Mild stress	15d	Short-term coercion	6	6	16.02	3.92408	16.43	4.02451
27	584	WEI Zhen, PENG Shizhang, KONG Weili, GAO Huanzhi	2010	Journal of Hohai University (Natural Sciences)	118.768	32.0606	Oryza sativa L.	Monocotyledon	Graminae	Herbaceous	Tillering stage	Preceding period	Yield	0.4	Heavy stress	15d	Short-term coercion	6	6	15.6	3.8212	16.43	4.02451
27	585	WEI Zhen, PENG Shizhang, KONG Weili, GAO Huanzhi	2010	Journal of Hohai University (Natural Sciences)	118.768	32.0606	Oryza sativa L.	Monocotyledon	Graminae	Herbaceous	Jointing stage	Preceding period	Yield	0.55	Medium stress	15d	Short-term coercion	6	6	14.02	3.43418	16.43	4.02451
27	586	WEI Zhen, PENG Shizhang, KONG Weili, GAO Huanzhi	2010	Journal of Hohai University (Natural Sciences)	118.768	32.0606	Oryza sativa L.	Monocotyledon	Graminae	Herbaceous	Tasseling stage	Mid period	Yield	0.6	Medium stress	15d	Short-term coercion	6	6	14.06	3.44398	16.43	4.02451
27	587	WEI Zhen, PENG Shizhang, KONG Weili, GAO Huanzhi	2010	Journal of Hohai University (Natural Sciences)	118.768	32.0606	Oryza sativa L.	Monocotyledon	Graminae	Herbaceous	Tillering stage	Preceding period	WUE	0.5	Medium stress	15d	Short-term coercion	6	6	1.125	0.275568	0.935	0.229027
27	588	WEI Zhen, PENG Shizhang, KONG Weili, GAO Huanzhi	2010	Journal of Hohai University (Natural Sciences)	118.768	32.0606	Oryza sativa L.	Monocotyledon	Graminae	Herbaceous	Jointing stage	Preceding period	WUE	0.65	Medium stress	15d	Short-term coercion	6	6	1.128	0.276302	0.935	0.229027
27	589	WEI Zhen, PENG Shizhang, KONG Weili, GAO Huanzhi	2010	Journal of Hohai University (Natural Sciences)	118.768	32.0606	Oryza sativa L.	Monocotyledon	Graminae	Herbaceous	Tasseling stage	Mid period	WUE	0.7	Mild stress	15d	Short-term coercion	6	6	1.007	0.246664	0.935	0.229027
27	590	WEI Zhen, PENG Shizhang, KONG Weili, GAO Huanzhi	2010	Journal of Hohai University (Natural Sciences)	118.768	32.0606	Oryza sativa L.	Monocotyledon	Graminae	Herbaceous	Tillering stage	Preceding period	WUE	0.4	Heavy stress	15d	Short-term coercion	6	6	1	0.244949	0.935	0.229027
27	591	WEI Zhen, PENG Shizhang, KONG Weili, GAO Huanzhi	2010	Journal of Hohai University (Natural Sciences)	118.768	32.0606	Oryza sativa L.	Monocotyledon	Graminae	Herbaceous	Jointing stage	Preceding period	WUE	0.55	Medium stress	15d	Short-term coercion	6	6	0.952	0.233191	0.935	0.229027
27	592	WEI Zhen, PENG Shizhang, KONG Weili, GAO Huanzhi	2010	Journal of Hohai University (Natural Sciences)	118.768	32.0606	Oryza sativa L.	Monocotyledon	Graminae	Herbaceous	Tasseling stage	Mid period	WUE	0.6	Medium stress	15d	Short-term coercion	6	6	0.924	0.226333	0.935	0.229027
27	593	WEI Zhen, PENG Shizhang, KONG Weili, GAO Huanzhi	2010	Journal of Hohai University (Natural Sciences)	118.768	32.0606	Oryza sativa L.	Monocotyledon	Graminae	Herbaceous	Tillering stage	Preceding period	WUE	0.5	Medium stress	15d	Short-term coercion	6	6	1.022	0.250338	0.849	0.207962
27	594	WEI Zhen, PENG Shizhang, KONG Weili, GAO Huanzhi	2010	Journal of Hohai University (Natural Sciences)	118.768	32.0606	Oryza sativa L.	Monocotyledon	Graminae	Herbaceous	Jointing stage	Preceding period	WUE	0.65	Medium stress	15d	Short-term coercion	6	6	1.012	0.247888	0.849	0.207962
27	595	WEI Zhen, PENG Shizhang, KONG Weili, GAO Huanzhi	2010	Journal of Hohai University (Natural Sciences)	118.768	32.0606	Oryza sativa L.	Monocotyledon	Graminae	Herbaceous	Tasseling stage	Mid period	WUE	0.7	Mild stress	15d	Short-term coercion	6	6	0.896	0.219474	0.849	0.207962
27	596	WEI Zhen, PENG Shizhang, KONG Weili, GAO Huanzhi	2010	Journal of Hohai University (Natural Sciences)	118.768	32.0606	Oryza sativa L.	Monocotyledon	Graminae	Herbaceous	Tillering stage	Preceding period	WUE	0.4	Heavy stress	15d	Short-term coercion	6	6	0.872	0.213596	0.849	0.207962
27	597	WEI Zhen, PENG Shizhang, KONG Weili, GAO Huanzhi	2010	Journal of Hohai University (Natural Sciences)	118.768	32.0606	Oryza sativa L.	Monocotyledon	Graminae	Herbaceous	Jointing stage	Preceding period	WUE	0.55	Medium stress	15d	Short-term coercion	6	6	0.766	0.187631	0.849	0.207962
27	598	WEI Zhen, PENG Shizhang, KONG Weili, GAO Huanzhi	2010	Journal of Hohai University (Natural Sciences)	118.768	32.0606	Oryza sativa L.	Monocotyledon	Graminae	Herbaceous	Tasseling stage	Mid period	WUE	0.6	Medium stress	15d	Short-term coercion	6	6	0.777	0.190325	0.849	0.207962
28	599	XIA Guimin, WANG Qianqing, ZHANG Junxiao, WU Qi, CHI Daocai, ZHANG Gengyuan	2021	Transactions of the Chinese Society for Agricultural Machinery	122.373	42.8255	Arachis hypogaea L.	Dicotyledons	Leguminosae	Herbaceous	Flower-pegging stage	Mid period	Dry matter	0.55	Medium stress	15d	Short-term coercion	3	3	134.83	3.08305	137.27	1.76669
28	600	XIA Guimin, WANG Qianqing, ZHANG Junxiao, WU Qi, CHI Daocai, ZHANG Gengyuan	2021	Transactions of the Chinese Society for Agricultural Machinery	122.373	42.8255	Arachis hypogaea L.	Dicotyledons	Leguminosae	Herbaceous	Flower-pegging stage	Mid period	Dry matter	0.65	Medium stress	15d	Short-term coercion	3	3	139.87	2.49415	137.27	1.76669
28	601	XIA Guimin, WANG Qianqing, ZHANG Junxiao, WU Qi, CHI Daocai, ZHANG Gengyuan	2021	Transactions of the Chinese Society for Agricultural Machinery	122.373	42.8255	Arachis hypogaea L.	Dicotyledons	Leguminosae	Herbaceous	Pod-bearing period	Later period	Dry matter	0.55	Medium stress	15d	Short-term coercion	3	3	139.03	2.99645	137.27	1.76669
28	602	XIA Guimin, WANG Qianqing, ZHANG Junxiao, WU Qi, CHI Daocai, ZHANG Gengyuan	2021	Transactions of the Chinese Society for Agricultural Machinery	122.373	42.8255	Arachis hypogaea L.	Dicotyledons	Leguminosae	Herbaceous	Pod-bearing period	Later period	Dry matter	0.65	Medium stress	15d	Short-term coercion	3	3	139.98	3.3775	137.27	1.76669
28	603	XIA Guimin, WANG Qianqing, ZHANG Junxiao, WU Qi, CHI Daocai, ZHANG Gengyuan	2021	Transactions of the Chinese Society for Agricultural Machinery	122.373	42.8255	Arachis hypogaea L.	Dicotyledons	Leguminosae	Herbaceous	Flower-pegging stage	Mid period	Dry matter	0.55	Medium stress	15d	Short-term coercion	3	3	135.41	2.99645	137.34	4.52065
28	604	XIA Guimin, WANG Qianqing, ZHANG Junxiao, WU Qi, CHI Daocai, ZHANG Gengyuan	2021	Transactions of the Chinese Society for Agricultural Machinery	122.373	42.8255	Arachis hypogaea L.	Dicotyledons	Leguminosae	Herbaceous	Flower-pegging stage	Mid period	Dry matter	0.65	Medium stress	15d	Short-term coercion	3	3	139.55	5.43864	137.34	4.52065
28	605	XIA Guimin, WANG Qianqing, ZHANG Junxiao, WU Qi, CHI Daocai, ZHANG Gengyuan	2021	Transactions of the Chinese Society for Agricultural Machinery	122.373	42.8255	Arachis hypogaea L.	Dicotyledons	Leguminosae	Herbaceous	Pod-bearing period	Later period	Dry matter	0.55	Medium stress	15d	Short-term coercion	3	3	140.37	5.00563	137.34	4.52065
28	606	XIA Guimin, WANG Qianqing, ZHANG Junxiao, WU Qi, CHI Daocai, ZHANG Gengyuan	2021	Transactions of the Chinese Society for Agricultural Machinery	122.373	42.8255	Arachis hypogaea L.	Dicotyledons	Leguminosae	Herbaceous	Pod-bearing period	Later period	Dry matter	0.65	Medium stress	15d	Short-term coercion	3	3	140.78	2.77128	137.34	4.52065
28	607	XIA Guimin, WANG Qianqing, ZHANG Junxiao, WU Qi, CHI Daocai, ZHANG Gengyuan	2021	Transactions of the Chinese Society for Agricultural Machinery	122.373	42.8255	Arachis hypogaea L.	Dicotyledons	Leguminosae	Herbaceous	Flower-pegging stage	Mid period	Yield	0.55	Medium stress	15d	Short-term coercion	3	3	2826.67	116.619	2680.05	123.149
28	608	XIA Guimin, WANG Qianqing, ZHANG Junxiao, WU Qi, CHI Daocai, ZHANG Gengyuan	2021	Transactions of the Chinese Society for Agricultural Machinery	122.373	42.8255	Arachis hypogaea L.	Dicotyledons	Leguminosae	Herbaceous	Flower-pegging stage	Mid period	Yield	0.65	Medium stress	15d	Short-term coercion	3	3	2860.12	106.452	2680.05	123.149
28	609	XIA Guimin, WANG Qianqing, ZHANG Junxiao, WU Qi, CHI Daocai, ZHANG Gengyuan	2021	Transactions of the Chinese Society for Agricultural Machinery	122.373	42.8255	Arachis hypogaea L.	Dicotyledons	Leguminosae	Herbaceous	Pod-bearing period	Later period	Yield	0.55	Medium stress	15d	Short-term coercion	3	3	2840.15	98.8308	2680.05	123.149
28	610	XIA Guimin, WANG Qianqing, ZHANG Junxiao, WU Qi, CHI Daocai, ZHANG Gengyuan	2021	Transactions of the Chinese Society for Agricultural Machinery	122.373	42.8255	Arachis hypogaea L.	Dicotyledons	Leguminosae	Herbaceous	Pod-bearing period	Later period	Yield	0.65	Medium stress	15d	Short-term coercion	3	3	3006.61	117.676	2680.05	123.149
28	611	XIA Guimin, WANG Qianqing, ZHANG Junxiao, WU Qi, CHI Daocai, ZHANG Gengyuan	2021	Transactions of the Chinese Society for Agricultural Machinery	122.373	42.8255	Arachis hypogaea L.	Dicotyledons	Leguminosae	Herbaceous	Flower-pegging stage	Mid period	Yield	0.55	Medium stress	15d	Short-term coercion	3	3	2554.92	253.486	2424.8	71.8628
28	612	XIA Guimin, WANG Qianqing, ZHANG Junxiao, WU Qi, CHI Daocai, ZHANG Gengyuan	2021	Transactions of the Chinese Society for Agricultural Machinery	122.373	42.8255	Arachis hypogaea L.	Dicotyledons	Leguminosae	Herbaceous	Flower-pegging stage	Mid period	Yield	0.65	Medium stress	15d	Short-term coercion	3	3	2665.26	62.1806	2424.8	71.8628
28	613	XIA Guimin, WANG Qianqing, ZHANG Junxiao, WU Qi, CHI Daocai, ZHANG Gengyuan	2021	Transactions of the Chinese Society for Agricultural Machinery	122.373	42.8255	Arachis hypogaea L.	Dicotyledons	Leguminosae	Herbaceous	Pod-bearing period	Later period	Yield	0.55	Medium stress	15d	Short-term coercion	3	3	2689.04	57.1923	2424.8	71.8628
28	614	XIA Guimin, WANG Qianqing, ZHANG Junxiao, WU Qi, CHI Daocai, ZHANG Gengyuan	2021	Transactions of the Chinese Society for Agricultural Machinery	122.373	42.8255	Arachis hypogaea L.	Dicotyledons	Leguminosae	Herbaceous	Pod-bearing period	Later period	Yield	0.65	Medium stress	15d	Short-term coercion	3	3	2765.99	68.0003	2424.8	71.8628
28	615	XIA Guimin, WANG Qianqing, ZHANG Junxiao, WU Qi, CHI Daocai, ZHANG Gengyuan	2021	Transactions of the Chinese Society for Agricultural Machinery	122.373	42.8255	Arachis hypogaea L.	Dicotyledons	Leguminosae	Herbaceous	Flower-pegging stage	Mid period	Pn	0.55	Medium stress	15d	Short-term coercion	3	3	27.0226	3.64642	30.8722	2.70877
28	616	XIA Guimin, WANG Qianqing, ZHANG Junxiao, WU Qi, CHI Daocai, ZHANG Gengyuan	2021	Transactions of the Chinese Society for Agricultural Machinery	122.373	42.8255	Arachis hypogaea L.	Dicotyledons	Leguminosae	Herbaceous	Flower-pegging stage	Mid period	Pn	0.65	Medium stress	15d	Short-term coercion	3	3	31.9549	5.20918	30.8722	2.70877
28	617	XIA Guimin, WANG Qianqing, ZHANG Junxiao, WU Qi, CHI Daocai, ZHANG Gengyuan	2021	Transactions of the Chinese Society for Agricultural Machinery	122.373	42.8255	Arachis hypogaea L.	Dicotyledons	Leguminosae	Herbaceous	Pod-bearing period	Later period	Pn	0.55	Medium stress	15d	Short-term coercion	3	3	27.5639	1.8753	30.8722	2.70877
28	618	XIA Guimin, WANG Qianqing, ZHANG Junxiao, WU Qi, CHI Daocai, ZHANG Gengyuan	2021	Transactions of the Chinese Society for Agricultural Machinery	122.373	42.8255	Arachis hypogaea L.	Dicotyledons	Leguminosae	Herbaceous	Pod-bearing period	Later period	Pn	0.65	Medium stress	15d	Short-term coercion	3	3	31.5338	0.625101	30.8722	2.70877
28	619	XIA Guimin, WANG Qianqing, ZHANG Junxiao, WU Qi, CHI Daocai, ZHANG Gengyuan	2021	Transactions of the Chinese Society for Agricultural Machinery	122.373	42.8255	Arachis hypogaea L.	Dicotyledons	Leguminosae	Herbaceous	Flower-pegging stage	Mid period	Pn	0.55	Medium stress	15d	Short-term coercion	3	3	27.851	0.217355	30.9882	2.60826
28	620	XIA Guimin, WANG Qianqing, ZHANG Junxiao, WU Qi, CHI Daocai, ZHANG Gengyuan	2021	Transactions of the Chinese Society for Agricultural Machinery	122.373	42.8255	Arachis hypogaea L.	Dicotyledons	Leguminosae	Herbaceous	Flower-pegging stage	Mid period	Pn	0.65	Medium stress	15d	Short-term coercion	3	3	31.8039	4.78182	30.9882	2.60826
28	621	XIA Guimin, WANG Qianqing, ZHANG Junxiao, WU Qi, CHI Daocai, ZHANG Gengyuan	2021	Transactions of the Chinese Society for Agricultural Machinery	122.373	42.8255	Arachis hypogaea L.	Dicotyledons	Leguminosae	Herbaceous	Pod-bearing period	Later period	Pn	0.55	Medium stress	15d	Short-term coercion	3	3	27.2235	4.99917	30.9882	2.60826
28	622	XIA Guimin, WANG Qianqing, ZHANG Junxiao, WU Qi, CHI Daocai, ZHANG Gengyuan	2021	Transactions of the Chinese Society for Agricultural Machinery	122.373	42.8255	Arachis hypogaea L.	Dicotyledons	Leguminosae	Herbaceous	Pod-bearing period	Later period	Pn	0.65	Medium stress	15d	Short-term coercion	3	3	31.3647	1.08678	30.9882	2.60826
28	623	XIA Guimin, WANG Qianqing, ZHANG Junxiao, WU Qi, CHI Daocai, ZHANG Gengyuan	2021	Transactions of the Chinese Society for Agricultural Machinery	122.373	42.8255	Arachis hypogaea L.	Dicotyledons	Leguminosae	Herbaceous	Flower-pegging stage	Mid period	Tr	0.55	Medium stress	15d	Short-term coercion	3	3	7.48	1.9399	8.28	3.81051
28	624	XIA Guimin, WANG Qianqing, ZHANG Junxiao, WU Qi, CHI Daocai, ZHANG Gengyuan	2021	Transactions of the Chinese Society for Agricultural Machinery	122.373	42.8255	Arachis hypogaea L.	Dicotyledons	Leguminosae	Herbaceous	Flower-pegging stage	Mid period	Tr	0.65	Medium stress	15d	Short-term coercion	3	3	8.48	0.69282	8.28	3.81051
28	625	XIA Guimin, WANG Qianqing, ZHANG Junxiao, WU Qi, CHI Daocai, ZHANG Gengyuan	2021	Transactions of the Chinese Society for Agricultural Machinery	122.373	42.8255	Arachis hypogaea L.	Dicotyledons	Leguminosae	Herbaceous	Pod-bearing period	Later period	Tr	0.55	Medium stress	15d	Short-term coercion	3	3	6.9	1.9399	8.28	3.81051
28	626	XIA Guimin, WANG Qianqing, ZHANG Junxiao, WU Qi, CHI Daocai, ZHANG Gengyuan	2021	Transactions of the Chinese Society for Agricultural Machinery	122.373	42.8255	Arachis hypogaea L.	Dicotyledons	Leguminosae	Herbaceous	Pod-bearing period	Later period	Tr	0.65	Medium stress	15d	Short-term coercion	3	3	8.1	1.31636	8.28	3.81051
28	627	XIA Guimin, WANG Qianqing, ZHANG Junxiao, WU Qi, CHI Daocai, ZHANG Gengyuan	2021	Transactions of the Chinese Society for Agricultural Machinery	122.373	42.8255	Arachis hypogaea L.	Dicotyledons	Leguminosae	Herbaceous	Flower-pegging stage	Mid period	Tr	0.55	Medium stress	15d	Short-term coercion	3	3	7.40964	2.08681	8.25301	2.43461
28	628	XIA Guimin, WANG Qianqing, ZHANG Junxiao, WU Qi, CHI Daocai, ZHANG Gengyuan	2021	Transactions of the Chinese Society for Agricultural Machinery	122.373	42.8255	Arachis hypogaea L.	Dicotyledons	Leguminosae	Herbaceous	Flower-pegging stage	Mid period	Tr	0.65	Medium stress	15d	Short-term coercion	3	3	8.05221	1.80857	8.25301	2.43461
28	629	XIA Guimin, WANG Qianqing, ZHANG Junxiao, WU Qi, CHI Daocai, ZHANG Gengyuan	2021	Transactions of the Chinese Society for Agricultural Machinery	122.373	42.8255	Arachis hypogaea L.	Dicotyledons	Leguminosae	Herbaceous	Pod-bearing period	Later period	Tr	0.55	Medium stress	15d	Short-term coercion	3	3	6.84739	0.973844	8.25301	2.43461
28	630	XIA Guimin, WANG Qianqing, ZHANG Junxiao, WU Qi, CHI Daocai, ZHANG Gengyuan	2021	Transactions of the Chinese Society for Agricultural Machinery	122.373	42.8255	Arachis hypogaea L.	Dicotyledons	Leguminosae	Herbaceous	Pod-bearing period	Later period	Tr	0.65	Medium stress	15d	Short-term coercion	3	3	8.41365	1.66945	8.25301	2.43461
29	631	ZHNAG Jiao, WU Qi, ZHOU Yufei, WANG Yitao, ZHANG Ruidong, HUANG Ruidong	2018	Crops	123.57	41.8244	Sorghum bicolor (L.) Moench	Monocotyledon	Graminae	Herbaceous	Seedling stage	Preceding period	Pn	0.4	Heavy stress	10d	Short-term coercion	10	10	33.7313	39.6465	38.0597	14.1595
29	632	ZHNAG Jiao, WU Qi, ZHOU Yufei, WANG Yitao, ZHANG Ruidong, HUANG Ruidong	2018	Crops	123.57	41.8244	Sorghum bicolor (L.) Moench	Monocotyledon	Graminae	Herbaceous	Period of grouting	Mid period	Pn	0.4	Heavy stress	10d	Short-term coercion	10	10	36.4179	8.49567	39.2537	10.3836
29	633	ZHNAG Jiao, WU Qi, ZHOU Yufei, WANG Yitao, ZHANG Ruidong, HUANG Ruidong	2018	Crops	123.57	41.8244	Sorghum bicolor (L.) Moench	Monocotyledon	Graminae	Herbaceous	Seedling stage	Preceding period	Pn	0.4	Heavy stress	10d	Short-term coercion	10	10	23.8806	34.9266	31.194	11.3276
29	634	ZHNAG Jiao, WU Qi, ZHOU Yufei, WANG Yitao, ZHANG Ruidong, HUANG Ruidong	2018	Crops	123.57	41.8244	Sorghum bicolor (L.) Moench	Monocotyledon	Graminae	Herbaceous	Period of grouting	Mid period	Pn	0.4	Heavy stress	10d	Short-term coercion	10	10	29.403	31.1508	31.9403	9.43963
29	635	ZHNAG Jiao, WU Qi, ZHOU Yufei, WANG Yitao, ZHANG Ruidong, HUANG Ruidong	2018	Crops	123.57	41.8244	Sorghum bicolor (L.) Moench	Monocotyledon	Graminae	Herbaceous	Seedling stage	Preceding period	Gs	0.4	Heavy stress	10d	Short-term coercion	10	10	0.245014	0.360374	0.346154	0.0991027
29	636	ZHNAG Jiao, WU Qi, ZHOU Yufei, WANG Yitao, ZHANG Ruidong, HUANG Ruidong	2018	Crops	123.57	41.8244	Sorghum bicolor (L.) Moench	Monocotyledon	Graminae	Herbaceous	Period of grouting	Mid period	Gs	0.4	Heavy stress	10d	Short-term coercion	10	10	0.306268	0.153159	0.366097	0.41443
29	637	ZHNAG Jiao, WU Qi, ZHOU Yufei, WANG Yitao, ZHANG Ruidong, HUANG Ruidong	2018	Crops	123.57	41.8244	Sorghum bicolor (L.) Moench	Monocotyledon	Graminae	Herbaceous	Seedling stage	Preceding period	Gs	0.4	Heavy stress	10d	Short-term coercion	10	10	0.233618	0.171177	0.269231	0.180187
29	638	ZHNAG Jiao, WU Qi, ZHOU Yufei, WANG Yitao, ZHANG Ruidong, HUANG Ruidong	2018	Crops	123.57	41.8244	Sorghum bicolor (L.) Moench	Monocotyledon	Graminae	Herbaceous	Period of grouting	Mid period	Gs	0.4	Heavy stress	10d	Short-term coercion	10	10	0.242165	0.198205	0.249288	0.108112
29	639	ZHNAG Jiao, WU Qi, ZHOU Yufei, WANG Yitao, ZHANG Ruidong, HUANG Ruidong	2018	Crops	123.57	41.8244	Sorghum bicolor (L.) Moench	Monocotyledon	Graminae	Herbaceous	Seedling stage	Preceding period	Ci	0.4	Heavy stress	10d	Short-term coercion	10	10	82.6748	69.2049	103.343	157.633
29	640	ZHNAG Jiao, WU Qi, ZHOU Yufei, WANG Yitao, ZHANG Ruidong, HUANG Ruidong	2018	Crops	123.57	41.8244	Sorghum bicolor (L.) Moench	Monocotyledon	Graminae	Herbaceous	Period of grouting	Mid period	Ci	0.4	Heavy stress	10d	Short-term coercion	10	10	111.854	7.68943	124.012	15.3789
29	641	ZHNAG Jiao, WU Qi, ZHOU Yufei, WANG Yitao, ZHANG Ruidong, HUANG Ruidong	2018	Crops	123.57	41.8244	Sorghum bicolor (L.) Moench	Monocotyledon	Graminae	Herbaceous	Seedling stage	Preceding period	Ci	0.4	Heavy stress	10d	Short-term coercion	10	10	133.131	46.1366	156.839	73.0496
29	642	ZHNAG Jiao, WU Qi, ZHOU Yufei, WANG Yitao, ZHANG Ruidong, HUANG Ruidong	2018	Crops	123.57	41.8244	Sorghum bicolor (L.) Moench	Monocotyledon	Graminae	Herbaceous	Period of grouting	Mid period	Ci	0.4	Heavy stress	10d	Short-term coercion	10	10	149.544	38.4471	159.878	38.4471
29	643	ZHNAG Jiao, WU Qi, ZHOU Yufei, WANG Yitao, ZHANG Ruidong, HUANG Ruidong	2018	Crops	123.57	41.8244	Sorghum bicolor (L.) Moench	Monocotyledon	Graminae	Herbaceous	Seedling stage	Preceding period	Tr	0.4	Heavy stress	10d	Short-term coercion	10	10	6.53913	7.25949	8.52174	3.07978
29	644	ZHNAG Jiao, WU Qi, ZHOU Yufei, WANG Yitao, ZHANG Ruidong, HUANG Ruidong	2018	Crops	123.57	41.8244	Sorghum bicolor (L.) Moench	Monocotyledon	Graminae	Herbaceous	Period of grouting	Mid period	Tr	0.4	Heavy stress	10d	Short-term coercion	10	10	7.51304	2.19985	9.0087	5.49961
29	645	ZHNAG Jiao, WU Qi, ZHOU Yufei, WANG Yitao, ZHANG Ruidong, HUANG Ruidong	2018	Crops	123.57	41.8244	Sorghum bicolor (L.) Moench	Monocotyledon	Graminae	Herbaceous	Seedling stage	Preceding period	Tr	0.4	Heavy stress	10d	Short-term coercion	10	10	4.10435	4.83966	5.25217	4.39969
29	646	ZHNAG Jiao, WU Qi, ZHOU Yufei, WANG Yitao, ZHANG Ruidong, HUANG Ruidong	2018	Crops	123.57	41.8244	Sorghum bicolor (L.) Moench	Monocotyledon	Graminae	Herbaceous	Period of grouting	Mid period	Tr	0.4	Heavy stress	10d	Short-term coercion	10	10	4.97391	3.95972	5.42609	4.61968
30	647	LI Baifeng, FENG Hao, WU Pute	2008	Journal of Irrigation and Drainage	108.082	34.2803	Solanum lycopersicum	Dicotyledons	Solanaceae	Herbaceous	Seedling stage	Preceding period	Plant height	0.55	Medium stress	10d	Short-term coercion	3	3	29	5.02295	29.67	5.13899
30	648	LI Baifeng, FENG Hao, WU Pute	2008	Journal of Irrigation and Drainage	108.082	34.2803	Solanum lycopersicum	Dicotyledons	Solanaceae	Herbaceous	Seedling stage	Preceding period	Plant height	0.45	Heavy stress	10d	Short-term coercion	3	3	28.67	4.96579	29.67	5.13899
30	649	LI Baifeng, FENG Hao, WU Pute	2008	Journal of Irrigation and Drainage	108.082	34.2803	Solanum lycopersicum	Dicotyledons	Solanaceae	Herbaceous	Seedling stage	Preceding period	Plant height	0.4	Heavy stress	10d	Short-term coercion	3	3	28.33	4.9069	29.67	5.13899
30	650	LI Baifeng, FENG Hao, WU Pute	2008	Journal of Irrigation and Drainage	108.082	34.2803	Solanum lycopersicum	Dicotyledons	Solanaceae	Herbaceous	Seedling stage	Preceding period	Stem thickness	0.55	Medium stress	10d	Short-term coercion	3	3	0.732	0.126786	0.745	0.129038
30	651	LI Baifeng, FENG Hao, WU Pute	2008	Journal of Irrigation and Drainage	108.082	34.2803	Solanum lycopersicum	Dicotyledons	Solanaceae	Herbaceous	Seedling stage	Preceding period	Stem thickness	0.45	Heavy stress	10d	Short-term coercion	3	3	0.743	0.128691	0.745	0.129038
30	652	LI Baifeng, FENG Hao, WU Pute	2008	Journal of Irrigation and Drainage	108.082	34.2803	Solanum lycopersicum	Dicotyledons	Solanaceae	Herbaceous	Seedling stage	Preceding period	Stem thickness	0.4	Heavy stress	10d	Short-term coercion	3	3	0.678	0.117433	0.745	0.129038
30	653	LI Baifeng, FENG Hao, WU Pute	2008	Journal of Irrigation and Drainage	108.082	34.2803	Solanum lycopersicum	Dicotyledons	Solanaceae	Herbaceous	Seedling stage	Preceding period	Pn	0.55	Medium stress	10d	Short-term coercion	3	3	6.89	1.19338	6.96	1.20551
30	654	LI Baifeng, FENG Hao, WU Pute	2008	Journal of Irrigation and Drainage	108.082	34.2803	Solanum lycopersicum	Dicotyledons	Solanaceae	Herbaceous	Seedling stage	Preceding period	Pn	0.45	Heavy stress	10d	Short-term coercion	3	3	6.23	1.07907	6.96	1.20551
30	655	LI Baifeng, FENG Hao, WU Pute	2008	Journal of Irrigation and Drainage	108.082	34.2803	Solanum lycopersicum	Dicotyledons	Solanaceae	Herbaceous	Seedling stage	Preceding period	Pn	0.4	Heavy stress	10d	Short-term coercion	3	3	5.7	0.987269	6.96	1.20551
30	656	LI Baifeng, FENG Hao, WU Pute	2008	Journal of Irrigation and Drainage	108.082	34.2803	Solanum lycopersicum	Dicotyledons	Solanaceae	Herbaceous	Seedling stage	Preceding period	Tr	0.55	Medium stress	10d	Short-term coercion	3	3	9.66	1.67316	8.55	1.4809
30	657	LI Baifeng, FENG Hao, WU Pute	2008	Journal of Irrigation and Drainage	108.082	34.2803	Solanum lycopersicum	Dicotyledons	Solanaceae	Herbaceous	Seedling stage	Preceding period	Tr	0.45	Heavy stress	10d	Short-term coercion	3	3	7.93	1.37352	8.55	1.4809
30	658	LI Baifeng, FENG Hao, WU Pute	2008	Journal of Irrigation and Drainage	108.082	34.2803	Solanum lycopersicum	Dicotyledons	Solanaceae	Herbaceous	Seedling stage	Preceding period	Tr	0.4	Heavy stress	10d	Short-term coercion	3	3	7.07	1.22456	8.55	1.4809
30	659	LI Baifeng, FENG Hao, WU Pute	2008	Journal of Irrigation and Drainage	108.082	34.2803	Solanum lycopersicum	Dicotyledons	Solanaceae	Herbaceous	Seedling stage	Preceding period	WUE	0.55	Medium stress	10d	Short-term coercion	3	3	0.71	0.122976	0.81	0.140296
30	660	LI Baifeng, FENG Hao, WU Pute	2008	Journal of Irrigation and Drainage	108.082	34.2803	Solanum lycopersicum	Dicotyledons	Solanaceae	Herbaceous	Seedling stage	Preceding period	WUE	0.45	Heavy stress	10d	Short-term coercion	3	3	0.79	0.136832	0.81	0.140296
30	661	LI Baifeng, FENG Hao, WU Pute	2008	Journal of Irrigation and Drainage	108.082	34.2803	Solanum lycopersicum	Dicotyledons	Solanaceae	Herbaceous	Seedling stage	Preceding period	Biomass	0.55	Medium stress	10d	Short-term coercion	3	3	241.82	41.8845	170.36	29.5072
30	662	LI Baifeng, FENG Hao, WU Pute	2008	Journal of Irrigation and Drainage	108.082	34.2803	Solanum lycopersicum	Dicotyledons	Solanaceae	Herbaceous	Seedling stage	Preceding period	Biomass	0.45	Heavy stress	10d	Short-term coercion	3	3	218.49	37.8436	170.36	29.5072
30	663	LI Baifeng, FENG Hao, WU Pute	2008	Journal of Irrigation and Drainage	108.082	34.2803	Solanum lycopersicum	Dicotyledons	Solanaceae	Herbaceous	Seedling stage	Preceding period	Biomass	0.4	Heavy stress	10d	Short-term coercion	3	3	220.39	38.1727	170.36	29.5072
30	664	LI Baifeng, FENG Hao, WU Pute	2008	Journal of Irrigation and Drainage	108.082	34.2803	Solanum lycopersicum	Dicotyledons	Solanaceae	Herbaceous	Seedling stage	Preceding period	Yield	0.55	Medium stress	10d	Short-term coercion	3	3	2.315	0.40097	1.68	0.290985
30	665	LI Baifeng, FENG Hao, WU Pute	2008	Journal of Irrigation and Drainage	108.082	34.2803	Solanum lycopersicum	Dicotyledons	Solanaceae	Herbaceous	Seedling stage	Preceding period	Yield	0.45	Heavy stress	10d	Short-term coercion	3	3	2.37	0.410496	1.68	0.290985
30	666	LI Baifeng, FENG Hao, WU Pute	2008	Journal of Irrigation and Drainage	108.082	34.2803	Solanum lycopersicum	Dicotyledons	Solanaceae	Herbaceous	Seedling stage	Preceding period	Yield	0.4	Heavy stress	10d	Short-term coercion	3	3	2.011	0.348315	1.68	0.290985
31	667	LIU Jili, ZHAO Changxing, WU Na, WANG Yuefu, WANG Minglun	2013	Scientia Agricultura Sinica	120.086	36.4466	Arachis hypogaea L.	Dicotyledons	Leguminosae	Herbaceous	Seedling stage	Preceding period	Pn	0.55	Medium stress	5d	Short-term coercion	3	3	22.1105	3.82964	22.3077	3.86381
31	668	LIU Jili, ZHAO Changxing, WU Na, WANG Yuefu, WANG Minglun	2013	Scientia Agricultura Sinica	120.086	36.4466	Arachis hypogaea L.	Dicotyledons	Leguminosae	Herbaceous	Seedling stage	Preceding period	Pn	0.55	Medium stress	15d	Short-term coercion	3	3	19.7436	3.41969	23.3077	4.03701
31	669	LIU Jili, ZHAO Changxing, WU Na, WANG Yuefu, WANG Minglun	2013	Scientia Agricultura Sinica	120.086	36.4466	Arachis hypogaea L.	Dicotyledons	Leguminosae	Herbaceous	Seedling stage	Preceding period	Tr	0.55	Medium stress	5d	Short-term coercion	3	3	3.52355	0.610298	3.69058	0.639227
31	670	LIU Jili, ZHAO Changxing, WU Na, WANG Yuefu, WANG Minglun	2013	Scientia Agricultura Sinica	120.086	36.4466	Arachis hypogaea L.	Dicotyledons	Leguminosae	Herbaceous	Seedling stage	Preceding period	Tr	0.55	Medium stress	15d	Short-term coercion	3	3	3.41435	0.591382	4.69058	0.812432
31	671	LIU Jili, ZHAO Changxing, WU Na, WANG Yuefu, WANG Minglun	2013	Scientia Agricultura Sinica	120.086	36.4466	Arachis hypogaea L.	Dicotyledons	Leguminosae	Herbaceous	Seedling stage	Preceding period	WUE	0.55	Medium stress	5d	Short-term coercion	3	3	1.47	0.254611	1.35	0.233827
31	672	LIU Jili, ZHAO Changxing, WU Na, WANG Yuefu, WANG Minglun	2013	Scientia Agricultura Sinica	120.086	36.4466	Arachis hypogaea L.	Dicotyledons	Leguminosae	Herbaceous	Seedling stage	Preceding period	WUE	0.55	Medium stress	15d	Short-term coercion	3	3	0.98	0.169741	1.35	0.233827
31	673	LIU Jili, ZHAO Changxing, WU Na, WANG Yuefu, WANG Minglun	2013	Scientia Agricultura Sinica	120.086	36.4466	Arachis hypogaea L.	Dicotyledons	Leguminosae	Herbaceous	Seedling stage	Preceding period	Yield	0.55	Medium stress	5d	Short-term coercion	3	3	4775	827.054	5225	904.997
31	674	LIU Jili, ZHAO Changxing, WU Na, WANG Yuefu, WANG Minglun	2013	Scientia Agricultura Sinica	120.086	36.4466	Arachis hypogaea L.	Dicotyledons	Leguminosae	Herbaceous	Seedling stage	Preceding period	Yield	0.55	Medium stress	15d	Short-term coercion	3	3	3025	523.945	5225	904.997
32	675	GUO Jiameng, MA Ye, MAO Jun, ZHENG Boyuan, RAN Wuling, HAN Xinpei, LI Dongliang, YANG Qinghua, SHAO Ruixin	2018	Journal of Maize Sciences	113.598	34.8702	Zea mays L.	Monocotyledon	Graminae	Herbaceous	Seedling stage	Preceding period	Plant height	0.55	Medium stress	15d	Short-term coercion	3	3	201	10.1498	218	6.755
32	676	GUO Jiameng, MA Ye, MAO Jun, ZHENG Boyuan, RAN Wuling, HAN Xinpei, LI Dongliang, YANG Qinghua, SHAO Ruixin	2018	Journal of Maize Sciences	113.598	34.8702	Zea mays L.	Monocotyledon	Graminae	Herbaceous	Seedling stage	Preceding period	Plant height	0.45	Heavy stress	15d	Short-term coercion	3	3	231	5.95825	218	6.755
32	677	GUO Jiameng, MA Ye, MAO Jun, ZHENG Boyuan, RAN Wuling, HAN Xinpei, LI Dongliang, YANG Qinghua, SHAO Ruixin	2018	Journal of Maize Sciences	113.598	34.8702	Zea mays L.	Monocotyledon	Graminae	Herbaceous	Seedling stage	Preceding period	Plant height	0.35	Heavy stress	15d	Short-term coercion	3	3	227	5.66381	218	6.755
32	678	GUO Jiameng, MA Ye, MAO Jun, ZHENG Boyuan, RAN Wuling, HAN Xinpei, LI Dongliang, YANG Qinghua, SHAO Ruixin	2018	Journal of Maize Sciences	113.598	34.8702	Zea mays L.	Monocotyledon	Graminae	Herbaceous	Seedling stage	Preceding period	Plant height	0.55	Medium stress	15d	Short-term coercion	3	3	211	2.59808	219	3.44678
32	679	GUO Jiameng, MA Ye, MAO Jun, ZHENG Boyuan, RAN Wuling, HAN Xinpei, LI Dongliang, YANG Qinghua, SHAO Ruixin	2018	Journal of Maize Sciences	113.598	34.8702	Zea mays L.	Monocotyledon	Graminae	Herbaceous	Seedling stage	Preceding period	Plant height	0.45	Heavy stress	15d	Short-term coercion	3	3	228	2.25167	219	3.44678
32	680	GUO Jiameng, MA Ye, MAO Jun, ZHENG Boyuan, RAN Wuling, HAN Xinpei, LI Dongliang, YANG Qinghua, SHAO Ruixin	2018	Journal of Maize Sciences	113.598	34.8702	Zea mays L.	Monocotyledon	Graminae	Herbaceous	Seedling stage	Preceding period	Plant height	0.35	Heavy stress	15d	Short-term coercion	3	3	226	7.23997	219	3.44678
32	681	GUO Jiameng, MA Ye, MAO Jun, ZHENG Boyuan, RAN Wuling, HAN Xinpei, LI Dongliang, YANG Qinghua, SHAO Ruixin	2018	Journal of Maize Sciences	113.598	34.8702	Zea mays L.	Monocotyledon	Graminae	Herbaceous	Seedling stage	Preceding period	Leaf area	0.55	Medium stress	15d	Short-term coercion	3	3	6793.27	133.235	6394.23	349.741
32	682	GUO Jiameng, MA Ye, MAO Jun, ZHENG Boyuan, RAN Wuling, HAN Xinpei, LI Dongliang, YANG Qinghua, SHAO Ruixin	2018	Journal of Maize Sciences	113.598	34.8702	Zea mays L.	Monocotyledon	Graminae	Herbaceous	Seedling stage	Preceding period	Leaf area	0.45	Heavy stress	15d	Short-term coercion	3	3	5908.65	299.778	6394.23	349.741
32	683	GUO Jiameng, MA Ye, MAO Jun, ZHENG Boyuan, RAN Wuling, HAN Xinpei, LI Dongliang, YANG Qinghua, SHAO Ruixin	2018	Journal of Maize Sciences	113.598	34.8702	Zea mays L.	Monocotyledon	Graminae	Herbaceous	Seedling stage	Preceding period	Leaf area	0.35	Heavy stress	15d	Short-term coercion	3	3	5408.65	199.852	6394.23	349.741
32	684	GUO Jiameng, MA Ye, MAO Jun, ZHENG Boyuan, RAN Wuling, HAN Xinpei, LI Dongliang, YANG Qinghua, SHAO Ruixin	2018	Journal of Maize Sciences	113.598	34.8702	Zea mays L.	Monocotyledon	Graminae	Herbaceous	Seedling stage	Preceding period	Leaf area	0.55	Medium stress	15d	Short-term coercion	3	3	6850.96	149.889	6456.73	299.778
32	685	GUO Jiameng, MA Ye, MAO Jun, ZHENG Boyuan, RAN Wuling, HAN Xinpei, LI Dongliang, YANG Qinghua, SHAO Ruixin	2018	Journal of Maize Sciences	113.598	34.8702	Zea mays L.	Monocotyledon	Graminae	Herbaceous	Seedling stage	Preceding period	Leaf area	0.45	Heavy stress	15d	Short-term coercion	3	3	6100.96	283.124	6456.73	299.778
32	686	GUO Jiameng, MA Ye, MAO Jun, ZHENG Boyuan, RAN Wuling, HAN Xinpei, LI Dongliang, YANG Qinghua, SHAO Ruixin	2018	Journal of Maize Sciences	113.598	34.8702	Zea mays L.	Monocotyledon	Graminae	Herbaceous	Seedling stage	Preceding period	Leaf area	0.35	Heavy stress	15d	Short-term coercion	3	3	5812.5	149.889	6456.73	299.778
32	687	GUO Jiameng, MA Ye, MAO Jun, ZHENG Boyuan, RAN Wuling, HAN Xinpei, LI Dongliang, YANG Qinghua, SHAO Ruixin	2018	Journal of Maize Sciences	113.598	34.8702	Zea mays L.	Monocotyledon	Graminae	Herbaceous	Seedling stage	Preceding period	Dry matter	0.55	Medium stress	15d	Short-term coercion	3	3	220	7.55174	215	6.2527
32	688	GUO Jiameng, MA Ye, MAO Jun, ZHENG Boyuan, RAN Wuling, HAN Xinpei, LI Dongliang, YANG Qinghua, SHAO Ruixin	2018	Journal of Maize Sciences	113.598	34.8702	Zea mays L.	Monocotyledon	Graminae	Herbaceous	Seedling stage	Preceding period	Dry matter	0.45	Heavy stress	15d	Short-term coercion	3	3	188	6.9282	215	6.2527
32	689	GUO Jiameng, MA Ye, MAO Jun, ZHENG Boyuan, RAN Wuling, HAN Xinpei, LI Dongliang, YANG Qinghua, SHAO Ruixin	2018	Journal of Maize Sciences	113.598	34.8702	Zea mays L.	Monocotyledon	Graminae	Herbaceous	Seedling stage	Preceding period	Dry matter	0.35	Heavy stress	15d	Short-term coercion	3	3	169	6.9282	215	6.2527
32	690	GUO Jiameng, MA Ye, MAO Jun, ZHENG Boyuan, RAN Wuling, HAN Xinpei, LI Dongliang, YANG Qinghua, SHAO Ruixin	2018	Journal of Maize Sciences	113.598	34.8702	Zea mays L.	Monocotyledon	Graminae	Herbaceous	Seedling stage	Preceding period	Dry matter	0.55	Medium stress	15d	Short-term coercion	3	3	221	11.3623	216	6.2527
32	691	GUO Jiameng, MA Ye, MAO Jun, ZHENG Boyuan, RAN Wuling, HAN Xinpei, LI Dongliang, YANG Qinghua, SHAO Ruixin	2018	Journal of Maize Sciences	113.598	34.8702	Zea mays L.	Monocotyledon	Graminae	Herbaceous	Seedling stage	Preceding period	Dry matter	0.45	Heavy stress	15d	Short-term coercion	3	3	184	5.3174	216	6.2527
32	692	GUO Jiameng, MA Ye, MAO Jun, ZHENG Boyuan, RAN Wuling, HAN Xinpei, LI Dongliang, YANG Qinghua, SHAO Ruixin	2018	Journal of Maize Sciences	113.598	34.8702	Zea mays L.	Monocotyledon	Graminae	Herbaceous	Seedling stage	Preceding period	Dry matter	0.35	Heavy stress	15d	Short-term coercion	3	3	167	4.58993	216	6.2527
32	693	GUO Jiameng, MA Ye, MAO Jun, ZHENG Boyuan, RAN Wuling, HAN Xinpei, LI Dongliang, YANG Qinghua, SHAO Ruixin	2018	Journal of Maize Sciences	113.598	34.8702	Zea mays L.	Monocotyledon	Graminae	Herbaceous	Seedling stage	Preceding period	Yield	0.55	Medium stress	15d	Short-term coercion	3	3	118	6.52983	116	3.5507
32	694	GUO Jiameng, MA Ye, MAO Jun, ZHENG Boyuan, RAN Wuling, HAN Xinpei, LI Dongliang, YANG Qinghua, SHAO Ruixin	2018	Journal of Maize Sciences	113.598	34.8702	Zea mays L.	Monocotyledon	Graminae	Herbaceous	Seedling stage	Preceding period	Yield	0.45	Heavy stress	15d	Short-term coercion	3	3	98.7	8.31384	116	3.5507
32	695	GUO Jiameng, MA Ye, MAO Jun, ZHENG Boyuan, RAN Wuling, HAN Xinpei, LI Dongliang, YANG Qinghua, SHAO Ruixin	2018	Journal of Maize Sciences	113.598	34.8702	Zea mays L.	Monocotyledon	Graminae	Herbaceous	Seedling stage	Preceding period	Yield	0.35	Heavy stress	15d	Short-term coercion	3	3	85.3	5.54256	116	3.5507
32	696	GUO Jiameng, MA Ye, MAO Jun, ZHENG Boyuan, RAN Wuling, HAN Xinpei, LI Dongliang, YANG Qinghua, SHAO Ruixin	2018	Journal of Maize Sciences	113.598	34.8702	Zea mays L.	Monocotyledon	Graminae	Herbaceous	Seedling stage	Preceding period	Yield	0.55	Medium stress	15d	Short-term coercion	3	3	126	8.08868	119	9.35307
32	697	GUO Jiameng, MA Ye, MAO Jun, ZHENG Boyuan, RAN Wuling, HAN Xinpei, LI Dongliang, YANG Qinghua, SHAO Ruixin	2018	Journal of Maize Sciences	113.598	34.8702	Zea mays L.	Monocotyledon	Graminae	Herbaceous	Seedling stage	Preceding period	Yield	0.45	Heavy stress	15d	Short-term coercion	3	3	96.5	8.81614	119	9.35307
32	698	GUO Jiameng, MA Ye, MAO Jun, ZHENG Boyuan, RAN Wuling, HAN Xinpei, LI Dongliang, YANG Qinghua, SHAO Ruixin	2018	Journal of Maize Sciences	113.598	34.8702	Zea mays L.	Monocotyledon	Graminae	Herbaceous	Seedling stage	Preceding period	Yield	0.35	Heavy stress	15d	Short-term coercion	3	3	83	7.15337	119	9.35307
33	699	ZHOU Xu, ZHANG Yuxian, LI Duo, FU Chenye, WANG Mengxue	2023	Journal of Heilongjiang Bayi Agricultural University	125.175	46.5938	Glycine max (L.) Merr.	Dicotyledons	Leguminosae	Herbaceous	Seedling stage	Preceding period	SPAD	0.6	Medium stress	15d	Short-term coercion	3	3	31	1.21244	30	1.24708
33	700	ZHOU Xu, ZHANG Yuxian, LI Duo, FU Chenye, WANG Mengxue	2023	Journal of Heilongjiang Bayi Agricultural University	125.175	46.5938	Glycine max (L.) Merr.	Dicotyledons	Leguminosae	Herbaceous	Seedling stage	Preceding period	SPAD	0.5	Medium stress	15d	Short-term coercion	3	3	27.3	0.294449	30	1.24708
33	701	ZHOU Xu, ZHANG Yuxian, LI Duo, FU Chenye, WANG Mengxue	2023	Journal of Heilongjiang Bayi Agricultural University	125.175	46.5938	Glycine max (L.) Merr.	Dicotyledons	Leguminosae	Herbaceous	Seedling stage	Preceding period	SPAD	0.4	Heavy stress	15d	Short-term coercion	3	3	24.33	0.536936	30	1.24708
33	702	ZHOU Xu, ZHANG Yuxian, LI Duo, FU Chenye, WANG Mengxue	2023	Journal of Heilongjiang Bayi Agricultural University	125.175	46.5938	Glycine max (L.) Merr.	Dicotyledons	Leguminosae	Herbaceous	Seedling stage	Preceding period	SPAD	0.6	Medium stress	15d	Short-term coercion	3	3	24.17	0.779423	23.43	0.433013
33	703	ZHOU Xu, ZHANG Yuxian, LI Duo, FU Chenye, WANG Mengxue	2023	Journal of Heilongjiang Bayi Agricultural University	125.175	46.5938	Glycine max (L.) Merr.	Dicotyledons	Leguminosae	Herbaceous	Seedling stage	Preceding period	SPAD	0.5	Medium stress	15d	Short-term coercion	3	3	26.07	1.12583	23.43	0.433013
33	704	ZHOU Xu, ZHANG Yuxian, LI Duo, FU Chenye, WANG Mengxue	2023	Journal of Heilongjiang Bayi Agricultural University	125.175	46.5938	Glycine max (L.) Merr.	Dicotyledons	Leguminosae	Herbaceous	Seedling stage	Preceding period	SPAD	0.4	Heavy stress	15d	Short-term coercion	3	3	20.93	0.987269	23.43	0.433013
33	705	ZHOU Xu, ZHANG Yuxian, LI Duo, FU Chenye, WANG Mengxue	2023	Journal of Heilongjiang Bayi Agricultural University	125.175	46.5938	Glycine max (L.) Merr.	Dicotyledons	Leguminosae	Herbaceous	Seedling stage	Preceding period	Plant height	0.6	Medium stress	15d	Short-term coercion	3	3	79.8	5.28275	79.1	3.41214
33	706	ZHOU Xu, ZHANG Yuxian, LI Duo, FU Chenye, WANG Mengxue	2023	Journal of Heilongjiang Bayi Agricultural University	125.175	46.5938	Glycine max (L.) Merr.	Dicotyledons	Leguminosae	Herbaceous	Seedling stage	Preceding period	Plant height	0.5	Medium stress	15d	Short-term coercion	3	3	68.2	3.72391	79.1	3.41214
33	707	ZHOU Xu, ZHANG Yuxian, LI Duo, FU Chenye, WANG Mengxue	2023	Journal of Heilongjiang Bayi Agricultural University	125.175	46.5938	Glycine max (L.) Merr.	Dicotyledons	Leguminosae	Herbaceous	Seedling stage	Preceding period	Plant height	0.4	Heavy stress	15d	Short-term coercion	3	3	60.42	4.10496	79.1	3.41214
33	708	ZHOU Xu, ZHANG Yuxian, LI Duo, FU Chenye, WANG Mengxue	2023	Journal of Heilongjiang Bayi Agricultural University	125.175	46.5938	Glycine max (L.) Merr.	Dicotyledons	Leguminosae	Herbaceous	Seedling stage	Preceding period	Plant height	0.6	Medium stress	15d	Short-term coercion	3	3	81.21	2.25167	79.96	4.57261
33	709	ZHOU Xu, ZHANG Yuxian, LI Duo, FU Chenye, WANG Mengxue	2023	Journal of Heilongjiang Bayi Agricultural University	125.175	46.5938	Glycine max (L.) Merr.	Dicotyledons	Leguminosae	Herbaceous	Seedling stage	Preceding period	Plant height	0.5	Medium stress	15d	Short-term coercion	3	3	82.05	1.33368	79.96	4.57261
33	710	ZHOU Xu, ZHANG Yuxian, LI Duo, FU Chenye, WANG Mengxue	2023	Journal of Heilongjiang Bayi Agricultural University	125.175	46.5938	Glycine max (L.) Merr.	Dicotyledons	Leguminosae	Herbaceous	Seedling stage	Preceding period	Plant height	0.4	Heavy stress	15d	Short-term coercion	3	3	73.25	1.45492	79.96	4.57261
33	711	ZHOU Xu, ZHANG Yuxian, LI Duo, FU Chenye, WANG Mengxue	2023	Journal of Heilongjiang Bayi Agricultural University	125.175	46.5938	Glycine max (L.) Merr.	Dicotyledons	Leguminosae	Herbaceous	Seedling stage	Preceding period	Plant height	0.6	Medium stress	15d	Short-term coercion	3	3	79.16	1.69741	82.37	2.52879
33	712	ZHOU Xu, ZHANG Yuxian, LI Duo, FU Chenye, WANG Mengxue	2023	Journal of Heilongjiang Bayi Agricultural University	125.175	46.5938	Glycine max (L.) Merr.	Dicotyledons	Leguminosae	Herbaceous	Seedling stage	Preceding period	Plant height	0.5	Medium stress	15d	Short-term coercion	3	3	75.95	1.69741	82.37	2.52879
33	713	ZHOU Xu, ZHANG Yuxian, LI Duo, FU Chenye, WANG Mengxue	2023	Journal of Heilongjiang Bayi Agricultural University	125.175	46.5938	Glycine max (L.) Merr.	Dicotyledons	Leguminosae	Herbaceous	Seedling stage	Preceding period	Plant height	0.4	Heavy stress	15d	Short-term coercion	3	3	72.74	1.69741	82.37	2.52879
33	714	ZHOU Xu, ZHANG Yuxian, LI Duo, FU Chenye, WANG Mengxue	2023	Journal of Heilongjiang Bayi Agricultural University	125.175	46.5938	Glycine max (L.) Merr.	Dicotyledons	Leguminosae	Herbaceous	Seedling stage	Preceding period	Plant height	0.6	Medium stress	15d	Short-term coercion	3	3	83.93	1.21244	81.62	4.46869
33	715	ZHOU Xu, ZHANG Yuxian, LI Duo, FU Chenye, WANG Mengxue	2023	Journal of Heilongjiang Bayi Agricultural University	125.175	46.5938	Glycine max (L.) Merr.	Dicotyledons	Leguminosae	Herbaceous	Seedling stage	Preceding period	Plant height	0.5	Medium stress	15d	Short-term coercion	3	3	86.24	1.21244	81.62	4.46869
33	716	ZHOU Xu, ZHANG Yuxian, LI Duo, FU Chenye, WANG Mengxue	2023	Journal of Heilongjiang Bayi Agricultural University	125.175	46.5938	Glycine max (L.) Merr.	Dicotyledons	Leguminosae	Herbaceous	Seedling stage	Preceding period	Plant height	0.4	Heavy stress	15d	Short-term coercion	3	3	80.55	1.21244	81.62	4.46869
33	717	ZHOU Xu, ZHANG Yuxian, LI Duo, FU Chenye, WANG Mengxue	2023	Journal of Heilongjiang Bayi Agricultural University	125.175	46.5938	Glycine max (L.) Merr.	Dicotyledons	Leguminosae	Herbaceous	Seedling stage	Preceding period	Stem thickness	0.6	Medium stress	15d	Short-term coercion	3	3	9.25	0.831384	9.11	0.969948
33	718	ZHOU Xu, ZHANG Yuxian, LI Duo, FU Chenye, WANG Mengxue	2023	Journal of Heilongjiang Bayi Agricultural University	125.175	46.5938	Glycine max (L.) Merr.	Dicotyledons	Leguminosae	Herbaceous	Seedling stage	Preceding period	Stem thickness	0.5	Medium stress	15d	Short-term coercion	3	3	8.62	0.502295	9.11	0.969948
33	719	ZHOU Xu, ZHANG Yuxian, LI Duo, FU Chenye, WANG Mengxue	2023	Journal of Heilongjiang Bayi Agricultural University	125.175	46.5938	Glycine max (L.) Merr.	Dicotyledons	Leguminosae	Herbaceous	Seedling stage	Preceding period	Stem thickness	0.4	Heavy stress	15d	Short-term coercion	3	3	8.33	0.571577	9.11	0.969948
33	720	ZHOU Xu, ZHANG Yuxian, LI Duo, FU Chenye, WANG Mengxue	2023	Journal of Heilongjiang Bayi Agricultural University	125.175	46.5938	Glycine max (L.) Merr.	Dicotyledons	Leguminosae	Herbaceous	Seedling stage	Preceding period	Stem thickness	0.6	Medium stress	15d	Short-term coercion	3	3	8.17	0.588897	7.8	0.69282
33	721	ZHOU Xu, ZHANG Yuxian, LI Duo, FU Chenye, WANG Mengxue	2023	Journal of Heilongjiang Bayi Agricultural University	125.175	46.5938	Glycine max (L.) Merr.	Dicotyledons	Leguminosae	Herbaceous	Seedling stage	Preceding period	Stem thickness	0.5	Medium stress	15d	Short-term coercion	3	3	8.38	0.225167	7.8	0.69282
33	722	ZHOU Xu, ZHANG Yuxian, LI Duo, FU Chenye, WANG Mengxue	2023	Journal of Heilongjiang Bayi Agricultural University	125.175	46.5938	Glycine max (L.) Merr.	Dicotyledons	Leguminosae	Herbaceous	Seedling stage	Preceding period	Stem thickness	0.4	Heavy stress	15d	Short-term coercion	3	3	4.35	0.415692	7.8	0.69282
33	723	ZHOU Xu, ZHANG Yuxian, LI Duo, FU Chenye, WANG Mengxue	2023	Journal of Heilongjiang Bayi Agricultural University	125.175	46.5938	Glycine max (L.) Merr.	Dicotyledons	Leguminosae	Herbaceous	Seedling stage	Preceding period	Stem thickness	0.6	Medium stress	15d	Short-term coercion	3	3	7.97	0.121244	9.1	0.34641
33	724	ZHOU Xu, ZHANG Yuxian, LI Duo, FU Chenye, WANG Mengxue	2023	Journal of Heilongjiang Bayi Agricultural University	125.175	46.5938	Glycine max (L.) Merr.	Dicotyledons	Leguminosae	Herbaceous	Seedling stage	Preceding period	Stem thickness	0.5	Medium stress	15d	Short-term coercion	3	3	7.75	0.069282	9.1	0.34641
33	725	ZHOU Xu, ZHANG Yuxian, LI Duo, FU Chenye, WANG Mengxue	2023	Journal of Heilongjiang Bayi Agricultural University	125.175	46.5938	Glycine max (L.) Merr.	Dicotyledons	Leguminosae	Herbaceous	Seedling stage	Preceding period	Stem thickness	0.4	Heavy stress	15d	Short-term coercion	3	3	7.54	0.121244	9.1	0.34641
33	726	ZHOU Xu, ZHANG Yuxian, LI Duo, FU Chenye, WANG Mengxue	2023	Journal of Heilongjiang Bayi Agricultural University	125.175	46.5938	Glycine max (L.) Merr.	Dicotyledons	Leguminosae	Herbaceous	Seedling stage	Preceding period	Stem thickness	0.6	Medium stress	15d	Short-term coercion	3	3	9.79	0.173205	10.12	0.32909
33	727	ZHOU Xu, ZHANG Yuxian, LI Duo, FU Chenye, WANG Mengxue	2023	Journal of Heilongjiang Bayi Agricultural University	125.175	46.5938	Glycine max (L.) Merr.	Dicotyledons	Leguminosae	Herbaceous	Seedling stage	Preceding period	Stem thickness	0.5	Medium stress	15d	Short-term coercion	3	3	9.46	1.71473	10.12	0.32909
33	728	ZHOU Xu, ZHANG Yuxian, LI Duo, FU Chenye, WANG Mengxue	2023	Journal of Heilongjiang Bayi Agricultural University	125.175	46.5938	Glycine max (L.) Merr.	Dicotyledons	Leguminosae	Herbaceous	Seedling stage	Preceding period	Stem thickness	0.4	Heavy stress	15d	Short-term coercion	3	3	9.13	1.71473	10.12	0.32909
33	729	ZHOU Xu, ZHANG Yuxian, LI Duo, FU Chenye, WANG Mengxue	2023	Journal of Heilongjiang Bayi Agricultural University	125.175	46.5938	Glycine max (L.) Merr.	Dicotyledons	Leguminosae	Herbaceous	Seedling stage	Preceding period	Pn	0.6	Medium stress	15d	Short-term coercion	3	3	22.4462	3.8878	20.4301	3.5386
33	730	ZHOU Xu, ZHANG Yuxian, LI Duo, FU Chenye, WANG Mengxue	2023	Journal of Heilongjiang Bayi Agricultural University	125.175	46.5938	Glycine max (L.) Merr.	Dicotyledons	Leguminosae	Herbaceous	Seedling stage	Preceding period	Pn	0.5	Medium stress	15d	Short-term coercion	3	3	18.1452	3.14283	20.4301	3.5386
33	731	ZHOU Xu, ZHANG Yuxian, LI Duo, FU Chenye, WANG Mengxue	2023	Journal of Heilongjiang Bayi Agricultural University	125.175	46.5938	Glycine max (L.) Merr.	Dicotyledons	Leguminosae	Herbaceous	Seedling stage	Preceding period	Pn	0.4	Heavy stress	15d	Short-term coercion	3	3	16.2634	2.81691	20.4301	3.5386
33	732	ZHOU Xu, ZHANG Yuxian, LI Duo, FU Chenye, WANG Mengxue	2023	Journal of Heilongjiang Bayi Agricultural University	125.175	46.5938	Glycine max (L.) Merr.	Dicotyledons	Leguminosae	Herbaceous	Seedling stage	Preceding period	Pn	0.6	Medium stress	15d	Short-term coercion	3	3	16.5323	2.86347	15.1882	2.63067
33	733	ZHOU Xu, ZHANG Yuxian, LI Duo, FU Chenye, WANG Mengxue	2023	Journal of Heilongjiang Bayi Agricultural University	125.175	46.5938	Glycine max (L.) Merr.	Dicotyledons	Leguminosae	Herbaceous	Seedling stage	Preceding period	Pn	0.5	Medium stress	15d	Short-term coercion	3	3	20.2957	3.51532	15.1882	2.63067
33	734	ZHOU Xu, ZHANG Yuxian, LI Duo, FU Chenye, WANG Mengxue	2023	Journal of Heilongjiang Bayi Agricultural University	125.175	46.5938	Glycine max (L.) Merr.	Dicotyledons	Leguminosae	Herbaceous	Seedling stage	Preceding period	Pn	0.4	Heavy stress	15d	Short-term coercion	3	3	14.3817	2.49099	15.1882	2.63067
33	735	ZHOU Xu, ZHANG Yuxian, LI Duo, FU Chenye, WANG Mengxue	2023	Journal of Heilongjiang Bayi Agricultural University	125.175	46.5938	Glycine max (L.) Merr.	Dicotyledons	Leguminosae	Herbaceous	Seedling stage	Preceding period	Gs	0.6	Medium stress	15d	Short-term coercion	3	3	0.533721	0.0924432	0.383721	0.0664624
33	736	ZHOU Xu, ZHANG Yuxian, LI Duo, FU Chenye, WANG Mengxue	2023	Journal of Heilongjiang Bayi Agricultural University	125.175	46.5938	Glycine max (L.) Merr.	Dicotyledons	Leguminosae	Herbaceous	Seedling stage	Preceding period	Gs	0.5	Medium stress	15d	Short-term coercion	3	3	0.265116	0.0459195	0.383721	0.0664624
33	737	ZHOU Xu, ZHANG Yuxian, LI Duo, FU Chenye, WANG Mengxue	2023	Journal of Heilongjiang Bayi Agricultural University	125.175	46.5938	Glycine max (L.) Merr.	Dicotyledons	Leguminosae	Herbaceous	Seedling stage	Preceding period	Gs	0.4	Heavy stress	15d	Short-term coercion	3	3	0.237209	0.0410859	0.383721	0.0664624
33	738	ZHOU Xu, ZHANG Yuxian, LI Duo, FU Chenye, WANG Mengxue	2023	Journal of Heilongjiang Bayi Agricultural University	125.175	46.5938	Glycine max (L.) Merr.	Dicotyledons	Leguminosae	Herbaceous	Seedling stage	Preceding period	Gs	0.6	Medium stress	15d	Short-term coercion	3	3	0.346821	0.0600711	0.134104	0.0232275
33	739	ZHOU Xu, ZHANG Yuxian, LI Duo, FU Chenye, WANG Mengxue	2023	Journal of Heilongjiang Bayi Agricultural University	125.175	46.5938	Glycine max (L.) Merr.	Dicotyledons	Leguminosae	Herbaceous	Seedling stage	Preceding period	Gs	0.5	Medium stress	15d	Short-term coercion	3	3	0.344509	0.0596707	0.134104	0.0232275
33	740	ZHOU Xu, ZHANG Yuxian, LI Duo, FU Chenye, WANG Mengxue	2023	Journal of Heilongjiang Bayi Agricultural University	125.175	46.5938	Glycine max (L.) Merr.	Dicotyledons	Leguminosae	Herbaceous	Seedling stage	Preceding period	Gs	0.4	Heavy stress	15d	Short-term coercion	3	3	0.196532	0.0340403	0.134104	0.0232275
33	741	ZHOU Xu, ZHANG Yuxian, LI Duo, FU Chenye, WANG Mengxue	2023	Journal of Heilongjiang Bayi Agricultural University	125.175	46.5938	Glycine max (L.) Merr.	Dicotyledons	Leguminosae	Herbaceous	Seedling stage	Preceding period	Ci	0.6	Medium stress	15d	Short-term coercion	3	3	252	43.6477	236.571	40.9754
33	742	ZHOU Xu, ZHANG Yuxian, LI Duo, FU Chenye, WANG Mengxue	2023	Journal of Heilongjiang Bayi Agricultural University	125.175	46.5938	Glycine max (L.) Merr.	Dicotyledons	Leguminosae	Herbaceous	Seedling stage	Preceding period	Ci	0.5	Medium stress	15d	Short-term coercion	3	3	219.429	38.0061	236.571	40.9754
33	743	ZHOU Xu, ZHANG Yuxian, LI Duo, FU Chenye, WANG Mengxue	2023	Journal of Heilongjiang Bayi Agricultural University	125.175	46.5938	Glycine max (L.) Merr.	Dicotyledons	Leguminosae	Herbaceous	Seedling stage	Preceding period	Ci	0.4	Heavy stress	15d	Short-term coercion	3	3	219.429	38.0061	236.571	40.9754
33	744	ZHOU Xu, ZHANG Yuxian, LI Duo, FU Chenye, WANG Mengxue	2023	Journal of Heilongjiang Bayi Agricultural University	125.175	46.5938	Glycine max (L.) Merr.	Dicotyledons	Leguminosae	Herbaceous	Seedling stage	Preceding period	Ci	0.6	Medium stress	15d	Short-term coercion	3	3	253.714	43.9446	152.571	26.4261
33	745	ZHOU Xu, ZHANG Yuxian, LI Duo, FU Chenye, WANG Mengxue	2023	Journal of Heilongjiang Bayi Agricultural University	125.175	46.5938	Glycine max (L.) Merr.	Dicotyledons	Leguminosae	Herbaceous	Seedling stage	Preceding period	Ci	0.5	Medium stress	15d	Short-term coercion	3	3	229.714	39.7877	152.571	26.4261
33	746	ZHOU Xu, ZHANG Yuxian, LI Duo, FU Chenye, WANG Mengxue	2023	Journal of Heilongjiang Bayi Agricultural University	125.175	46.5938	Glycine max (L.) Merr.	Dicotyledons	Leguminosae	Herbaceous	Seedling stage	Preceding period	Ci	0.4	Heavy stress	15d	Short-term coercion	3	3	210.857	36.5215	152.571	26.4261
33	747	ZHOU Xu, ZHANG Yuxian, LI Duo, FU Chenye, WANG Mengxue	2023	Journal of Heilongjiang Bayi Agricultural University	125.175	46.5938	Glycine max (L.) Merr.	Dicotyledons	Leguminosae	Herbaceous	Seedling stage	Preceding period	Tr	0.6	Medium stress	15d	Short-term coercion	3	3	5.07429	0.878892	4.35429	0.754184
33	748	ZHOU Xu, ZHANG Yuxian, LI Duo, FU Chenye, WANG Mengxue	2023	Journal of Heilongjiang Bayi Agricultural University	125.175	46.5938	Glycine max (L.) Merr.	Dicotyledons	Leguminosae	Herbaceous	Seedling stage	Preceding period	Tr	0.5	Medium stress	15d	Short-term coercion	3	3	3.29143	0.570092	4.35429	0.754184
33	749	ZHOU Xu, ZHANG Yuxian, LI Duo, FU Chenye, WANG Mengxue	2023	Journal of Heilongjiang Bayi Agricultural University	125.175	46.5938	Glycine max (L.) Merr.	Dicotyledons	Leguminosae	Herbaceous	Seedling stage	Preceding period	Tr	0.4	Heavy stress	15d	Short-term coercion	3	3	3.15429	0.546338	4.35429	0.754184
33	750	ZHOU Xu, ZHANG Yuxian, LI Duo, FU Chenye, WANG Mengxue	2023	Journal of Heilongjiang Bayi Agricultural University	125.175	46.5938	Glycine max (L.) Merr.	Dicotyledons	Leguminosae	Herbaceous	Seedling stage	Preceding period	Tr	0.6	Medium stress	15d	Short-term coercion	3	3	3.86364	0.669201	2.11364	0.366093
33	751	ZHOU Xu, ZHANG Yuxian, LI Duo, FU Chenye, WANG Mengxue	2023	Journal of Heilongjiang Bayi Agricultural University	125.175	46.5938	Glycine max (L.) Merr.	Dicotyledons	Leguminosae	Herbaceous	Seedling stage	Preceding period	Tr	0.5	Medium stress	15d	Short-term coercion	3	3	3.52273	0.610154	2.11364	0.366093
33	752	ZHOU Xu, ZHANG Yuxian, LI Duo, FU Chenye, WANG Mengxue	2023	Journal of Heilongjiang Bayi Agricultural University	125.175	46.5938	Glycine max (L.) Merr.	Dicotyledons	Leguminosae	Herbaceous	Seedling stage	Preceding period	Tr	0.4	Heavy stress	15d	Short-term coercion	3	3	2.63636	0.456632	2.11364	0.366093
33	753	ZHOU Xu, ZHANG Yuxian, LI Duo, FU Chenye, WANG Mengxue	2023	Journal of Heilongjiang Bayi Agricultural University	125.175	46.5938	Glycine max (L.) Merr.	Dicotyledons	Leguminosae	Herbaceous	Seedling stage	Preceding period	Yield	0.6	Medium stress	15d	Short-term coercion	3	3	12.84	0.831384	8.97	1.24708
33	754	ZHOU Xu, ZHANG Yuxian, LI Duo, FU Chenye, WANG Mengxue	2023	Journal of Heilongjiang Bayi Agricultural University	125.175	46.5938	Glycine max (L.) Merr.	Dicotyledons	Leguminosae	Herbaceous	Seedling stage	Preceding period	Yield	0.5	Medium stress	15d	Short-term coercion	3	3	8.7	0.502295	8.97	1.24708
33	755	ZHOU Xu, ZHANG Yuxian, LI Duo, FU Chenye, WANG Mengxue	2023	Journal of Heilongjiang Bayi Agricultural University	125.175	46.5938	Glycine max (L.) Merr.	Dicotyledons	Leguminosae	Herbaceous	Seedling stage	Preceding period	Yield	0.4	Heavy stress	15d	Short-term coercion	3	3	7.17	0.536936	8.97	1.24708
33	756	ZHOU Xu, ZHANG Yuxian, LI Duo, FU Chenye, WANG Mengxue	2023	Journal of Heilongjiang Bayi Agricultural University	125.175	46.5938	Glycine max (L.) Merr.	Dicotyledons	Leguminosae	Herbaceous	Seedling stage	Preceding period	Yield	0.6	Medium stress	15d	Short-term coercion	3	3	10.56	0.952628	11.94	0.866025
33	757	ZHOU Xu, ZHANG Yuxian, LI Duo, FU Chenye, WANG Mengxue	2023	Journal of Heilongjiang Bayi Agricultural University	125.175	46.5938	Glycine max (L.) Merr.	Dicotyledons	Leguminosae	Herbaceous	Seedling stage	Preceding period	Yield	0.5	Medium stress	15d	Short-term coercion	3	3	12.95	0.796743	11.94	0.866025
33	758	ZHOU Xu, ZHANG Yuxian, LI Duo, FU Chenye, WANG Mengxue	2023	Journal of Heilongjiang Bayi Agricultural University	125.175	46.5938	Glycine max (L.) Merr.	Dicotyledons	Leguminosae	Herbaceous	Seedling stage	Preceding period	Yield	0.4	Heavy stress	15d	Short-term coercion	3	3	8.6	0.952628	11.94	0.866025
33	759	ZHOU Xu, ZHANG Yuxian, LI Duo, FU Chenye, WANG Mengxue	2023	Journal of Heilongjiang Bayi Agricultural University	125.175	46.5938	Glycine max (L.) Merr.	Dicotyledons	Leguminosae	Herbaceous	Seedling stage	Preceding period	Yield	0.6	Medium stress	15d	Short-term coercion	3	3	14.68	0.34641	13.4	0.34641
33	760	ZHOU Xu, ZHANG Yuxian, LI Duo, FU Chenye, WANG Mengxue	2023	Journal of Heilongjiang Bayi Agricultural University	125.175	46.5938	Glycine max (L.) Merr.	Dicotyledons	Leguminosae	Herbaceous	Seedling stage	Preceding period	Yield	0.5	Medium stress	15d	Short-term coercion	3	3	12.84	0.294449	13.4	0.34641
33	761	ZHOU Xu, ZHANG Yuxian, LI Duo, FU Chenye, WANG Mengxue	2023	Journal of Heilongjiang Bayi Agricultural University	125.175	46.5938	Glycine max (L.) Merr.	Dicotyledons	Leguminosae	Herbaceous	Seedling stage	Preceding period	Yield	0.4	Heavy stress	15d	Short-term coercion	3	3	12.75	0.519615	13.4	0.34641
33	762	ZHOU Xu, ZHANG Yuxian, LI Duo, FU Chenye, WANG Mengxue	2023	Journal of Heilongjiang Bayi Agricultural University	125.175	46.5938	Glycine max (L.) Merr.	Dicotyledons	Leguminosae	Herbaceous	Seedling stage	Preceding period	Yield	0.6	Medium stress	15d	Short-term coercion	3	3	12.98	0.103923	12.76	0.121244
33	763	ZHOU Xu, ZHANG Yuxian, LI Duo, FU Chenye, WANG Mengxue	2023	Journal of Heilongjiang Bayi Agricultural University	125.175	46.5938	Glycine max (L.) Merr.	Dicotyledons	Leguminosae	Herbaceous	Seedling stage	Preceding period	Yield	0.5	Medium stress	15d	Short-term coercion	3	3	13.19	0.103923	12.76	0.121244
33	764	ZHOU Xu, ZHANG Yuxian, LI Duo, FU Chenye, WANG Mengxue	2023	Journal of Heilongjiang Bayi Agricultural University	125.175	46.5938	Glycine max (L.) Merr.	Dicotyledons	Leguminosae	Herbaceous	Seedling stage	Preceding period	Yield	0.4	Heavy stress	15d	Short-term coercion	3	3	13.19	0.103923	12.76	0.121244
34	765	ZHOU Xu, HE Xiaolei, CAO Liang, LI Duo, FU Chenye, ZHANG Mingcong, ZHANG Yuxian, WANG Mengxue	2023	Crops	125.175	46.5938	Glycine max (L.) Merr.	Dicotyledons	Leguminosae	Herbaceous	Seedling stage	Preceding period	Yield	0.6	Medium stress	15d	Short-term coercion	3	3	229.493	38.3126	212.903	3.4641
34	766	ZHOU Xu, HE Xiaolei, CAO Liang, LI Duo, FU Chenye, ZHANG Mingcong, ZHANG Yuxian, WANG Mengxue	2023	Crops	125.175	46.5938	Glycine max (L.) Merr.	Dicotyledons	Leguminosae	Herbaceous	Seedling stage	Preceding period	SOD	0.5	Medium stress	15d	Short-term coercion	3	3	204.608	19.1563	212.903	3.4641
34	767	ZHOU Xu, HE Xiaolei, CAO Liang, LI Duo, FU Chenye, ZHANG Mingcong, ZHANG Yuxian, WANG Mengxue	2023	Crops	125.175	46.5938	Glycine max (L.) Merr.	Dicotyledons	Leguminosae	Herbaceous	Seedling stage	Preceding period	SOD	0.4	Heavy stress	15d	Short-term coercion	3	3	124.424	57.469	212.903	3.4641
34	768	ZHOU Xu, HE Xiaolei, CAO Liang, LI Duo, FU Chenye, ZHANG Mingcong, ZHANG Yuxian, WANG Mengxue	2023	Crops	125.175	46.5938	Glycine max (L.) Merr.	Dicotyledons	Leguminosae	Herbaceous	Seedling stage	Preceding period	SOD	0.6	Medium stress	15d	Short-term coercion	3	3	327.315	44.905	294.907	22.4525
34	769	ZHOU Xu, HE Xiaolei, CAO Liang, LI Duo, FU Chenye, ZHANG Mingcong, ZHANG Yuxian, WANG Mengxue	2023	Crops	125.175	46.5938	Glycine max (L.) Merr.	Dicotyledons	Leguminosae	Herbaceous	Seedling stage	Preceding period	SOD	0.5	Medium stress	15d	Short-term coercion	3	3	366.204	33.6788	294.907	22.4525
34	770	ZHOU Xu, HE Xiaolei, CAO Liang, LI Duo, FU Chenye, ZHANG Mingcong, ZHANG Yuxian, WANG Mengxue	2023	Crops	125.175	46.5938	Glycine max (L.) Merr.	Dicotyledons	Leguminosae	Herbaceous	Seedling stage	Preceding period	SOD	0.4	Heavy stress	15d	Short-term coercion	3	3	288.426	33.6788	294.907	22.4525
34	771	ZHOU Xu, HE Xiaolei, CAO Liang, LI Duo, FU Chenye, ZHANG Mingcong, ZHANG Yuxian, WANG Mengxue	2023	Crops	125.175	46.5938	Glycine max (L.) Merr.	Dicotyledons	Leguminosae	Herbaceous	Seedling stage	Preceding period	POD	0.6	Medium stress	15d	Short-term coercion	3	3	901.408	390.321	563.38	390.321
34	772	ZHOU Xu, HE Xiaolei, CAO Liang, LI Duo, FU Chenye, ZHANG Mingcong, ZHANG Yuxian, WANG Mengxue	2023	Crops	125.175	46.5938	Glycine max (L.) Merr.	Dicotyledons	Leguminosae	Herbaceous	Seedling stage	Preceding period	POD	0.5	Medium stress	15d	Short-term coercion	3	3	845.07	390.321	563.38	390.321
34	773	ZHOU Xu, HE Xiaolei, CAO Liang, LI Duo, FU Chenye, ZHANG Mingcong, ZHANG Yuxian, WANG Mengxue	2023	Crops	125.175	46.5938	Glycine max (L.) Merr.	Dicotyledons	Leguminosae	Herbaceous	Seedling stage	Preceding period	POD	0.4	Heavy stress	15d	Short-term coercion	3	3	507.042	195.161	563.38	390.321
34	774	ZHOU Xu, HE Xiaolei, CAO Liang, LI Duo, FU Chenye, ZHANG Mingcong, ZHANG Yuxian, WANG Mengxue	2023	Crops	125.175	46.5938	Glycine max (L.) Merr.	Dicotyledons	Leguminosae	Herbaceous	Seedling stage	Preceding period	POD	0.6	Medium stress	15d	Short-term coercion	3	3	682.464	591.032	739.336	394.021
34	775	ZHOU Xu, HE Xiaolei, CAO Liang, LI Duo, FU Chenye, ZHANG Mingcong, ZHANG Yuxian, WANG Mengxue	2023	Crops	125.175	46.5938	Glycine max (L.) Merr.	Dicotyledons	Leguminosae	Herbaceous	Seedling stage	Preceding period	POD	0.5	Medium stress	15d	Short-term coercion	3	3	1592.42	985.053	739.336	394.021
34	776	ZHOU Xu, HE Xiaolei, CAO Liang, LI Duo, FU Chenye, ZHANG Mingcong, ZHANG Yuxian, WANG Mengxue	2023	Crops	125.175	46.5938	Glycine max (L.) Merr.	Dicotyledons	Leguminosae	Herbaceous	Seedling stage	Preceding period	POD	0.4	Heavy stress	15d	Short-term coercion	3	3	625.592	591.032	739.336	394.021
34	777	ZHOU Xu, HE Xiaolei, CAO Liang, LI Duo, FU Chenye, ZHANG Mingcong, ZHANG Yuxian, WANG Mengxue	2023	Crops	125.175	46.5938	Glycine max (L.) Merr.	Dicotyledons	Leguminosae	Herbaceous	Seedling stage	Preceding period	CAT	0.6	Medium stress	15d	Short-term coercion	3	3	314.019	294.611	274.766	249.286
34	778	ZHOU Xu, HE Xiaolei, CAO Liang, LI Duo, FU Chenye, ZHANG Mingcong, ZHANG Yuxian, WANG Mengxue	2023	Crops	125.175	46.5938	Glycine max (L.) Merr.	Dicotyledons	Leguminosae	Herbaceous	Seedling stage	Preceding period	CAT	0.5	Medium stress	15d	Short-term coercion	3	3	215.888	90.6494	274.766	249.286
34	779	ZHOU Xu, HE Xiaolei, CAO Liang, LI Duo, FU Chenye, ZHANG Mingcong, ZHANG Yuxian, WANG Mengxue	2023	Crops	125.175	46.5938	Glycine max (L.) Merr.	Dicotyledons	Leguminosae	Herbaceous	Seedling stage	Preceding period	CAT	0.4	Heavy stress	15d	Short-term coercion	3	3	189.72	249.286	274.766	249.286
34	780	ZHOU Xu, HE Xiaolei, CAO Liang, LI Duo, FU Chenye, ZHANG Mingcong, ZHANG Yuxian, WANG Mengxue	2023	Crops	125.175	46.5938	Glycine max (L.) Merr.	Dicotyledons	Leguminosae	Herbaceous	Seedling stage	Preceding period	CAT	0.6	Medium stress	15d	Short-term coercion	3	3	233.645	34.641	149.533	32.3748
34	781	ZHOU Xu, HE Xiaolei, CAO Liang, LI Duo, FU Chenye, ZHANG Mingcong, ZHANG Yuxian, WANG Mengxue	2023	Crops	125.175	46.5938	Glycine max (L.) Merr.	Dicotyledons	Leguminosae	Herbaceous	Seedling stage	Preceding period	CAT	0.5	Medium stress	15d	Short-term coercion	3	3	177.57	29.979	149.533	32.3748
34	782	ZHOU Xu, HE Xiaolei, CAO Liang, LI Duo, FU Chenye, ZHANG Mingcong, ZHANG Yuxian, WANG Mengxue	2023	Crops	125.175	46.5938	Glycine max (L.) Merr.	Dicotyledons	Leguminosae	Herbaceous	Seedling stage	Preceding period	CAT	0.4	Heavy stress	15d	Short-term coercion	3	3	214.953	210.436	149.533	32.3748
34	783	ZHOU Xu, HE Xiaolei, CAO Liang, LI Duo, FU Chenye, ZHANG Mingcong, ZHANG Yuxian, WANG Mengxue	2023	Crops	125.175	46.5938	Glycine max (L.) Merr.	Dicotyledons	Leguminosae	Herbaceous	Seedling stage	Preceding period	MDA	0.6	Medium stress	15d	Short-term coercion	3	3	111.574	4.9236	108.731	4.9236
34	784	ZHOU Xu, HE Xiaolei, CAO Liang, LI Duo, FU Chenye, ZHANG Mingcong, ZHANG Yuxian, WANG Mengxue	2023	Crops	125.175	46.5938	Glycine max (L.) Merr.	Dicotyledons	Leguminosae	Herbaceous	Seedling stage	Preceding period	MDA	0.5	Medium stress	15d	Short-term coercion	3	3	112.995	4.9236	108.731	4.9236
34	785	ZHOU Xu, HE Xiaolei, CAO Liang, LI Duo, FU Chenye, ZHANG Mingcong, ZHANG Yuxian, WANG Mengxue	2023	Crops	125.175	46.5938	Glycine max (L.) Merr.	Dicotyledons	Leguminosae	Herbaceous	Seedling stage	Preceding period	MDA	0.4	Heavy stress	15d	Short-term coercion	3	3	115.838	12.309	108.731	4.9236
34	786	ZHOU Xu, HE Xiaolei, CAO Liang, LI Duo, FU Chenye, ZHANG Mingcong, ZHANG Yuxian, WANG Mengxue	2023	Crops	125.175	46.5938	Glycine max (L.) Merr.	Dicotyledons	Leguminosae	Herbaceous	Seedling stage	Preceding period	MDA	0.6	Medium stress	15d	Short-term coercion	3	3	68.5279	3.16517	56.6497	6.33034
34	787	ZHOU Xu, HE Xiaolei, CAO Liang, LI Duo, FU Chenye, ZHANG Mingcong, ZHANG Yuxian, WANG Mengxue	2023	Crops	125.175	46.5938	Glycine max (L.) Merr.	Dicotyledons	Leguminosae	Herbaceous	Seedling stage	Preceding period	MDA	0.5	Medium stress	15d	Short-term coercion	3	3	86.802	3.16517	56.6497	6.33034
34	788	ZHOU Xu, HE Xiaolei, CAO Liang, LI Duo, FU Chenye, ZHANG Mingcong, ZHANG Yuxian, WANG Mengxue	2023	Crops	125.175	46.5938	Glycine max (L.) Merr.	Dicotyledons	Leguminosae	Herbaceous	Seedling stage	Preceding period	MDA	0.4	Heavy stress	15d	Short-term coercion	3	3	142.538	6.33034	56.6497	6.33034
35	789	ZHANG Jiyang, LIU Zugui, DUAN Aiwang, MENG Zhangjiang	2006	Cotton Science	113.927	35.3252	Gossypium spp	Dicotyledons	Malvaceae	Woody	Seedling stage	Preceding period	Plant height	0.55	Medium stress	20d	Short-term coercion	4	4	57.2	11.44	63.2	12.64
35	790	ZHANG Jiyang, LIU Zugui, DUAN Aiwang, MENG Zhangjiang	2006	Cotton Science	113.927	35.3252	Gossypium spp	Dicotyledons	Malvaceae	Woody	Seedling stage	Preceding period	Plant height	0.45	Heavy stress	20d	Short-term coercion	4	4	58.5	11.7	63.2	12.64
35	791	ZHANG Jiyang, LIU Zugui, DUAN Aiwang, MENG Zhangjiang	2006	Cotton Science	113.927	35.3252	Gossypium spp	Dicotyledons	Malvaceae	Woody	Bud stage	Mid period	Plant height	0.55	Medium stress	20d	Short-term coercion	4	4	60.2	12.04	63.2	12.64
35	792	ZHANG Jiyang, LIU Zugui, DUAN Aiwang, MENG Zhangjiang	2006	Cotton Science	113.927	35.3252	Gossypium spp	Dicotyledons	Malvaceae	Woody	Bud stage	Mid period	Plant height	0.45	Heavy stress	20d	Short-term coercion	4	4	59.7	11.94	63.2	12.64
35	793	ZHANG Jiyang, LIU Zugui, DUAN Aiwang, MENG Zhangjiang	2006	Cotton Science	113.927	35.3252	Gossypium spp	Dicotyledons	Malvaceae	Woody	Seedling stage	Preceding period	Dry matter	0.55	Medium stress	20d	Short-term coercion	4	4	95.52	19.104	101.2	20.24
35	794	ZHANG Jiyang, LIU Zugui, DUAN Aiwang, MENG Zhangjiang	2006	Cotton Science	113.927	35.3252	Gossypium spp	Dicotyledons	Malvaceae	Woody	Seedling stage	Preceding period	Dry matter	0.45	Heavy stress	20d	Short-term coercion	4	4	76.42	15.284	101.2	20.24
35	795	ZHANG Jiyang, LIU Zugui, DUAN Aiwang, MENG Zhangjiang	2006	Cotton Science	113.927	35.3252	Gossypium spp	Dicotyledons	Malvaceae	Woody	Bud stage	Mid period	Dry matter	0.55	Medium stress	20d	Short-term coercion	4	4	83.8	16.76	101.2	20.24
35	796	ZHANG Jiyang, LIU Zugui, DUAN Aiwang, MENG Zhangjiang	2006	Cotton Science	113.927	35.3252	Gossypium spp	Dicotyledons	Malvaceae	Woody	Bud stage	Mid period	Dry matter	0.45	Heavy stress	20d	Short-term coercion	4	4	82.18	16.436	101.2	20.24
35	797	ZHANG Jiyang, LIU Zugui, DUAN Aiwang, MENG Zhangjiang	2006	Cotton Science	113.927	35.3252	Gossypium spp	Dicotyledons	Malvaceae	Woody	Seedling stage	Preceding period	Pn	0.55	Medium stress	20d	Short-term coercion	4	4	13.98	2.796	14.15	2.83
35	798	ZHANG Jiyang, LIU Zugui, DUAN Aiwang, MENG Zhangjiang	2006	Cotton Science	113.927	35.3252	Gossypium spp	Dicotyledons	Malvaceae	Woody	Seedling stage	Preceding period	Pn	0.45	Heavy stress	20d	Short-term coercion	4	4	8.94	1.788	14.15	2.83
35	799	ZHANG Jiyang, LIU Zugui, DUAN Aiwang, MENG Zhangjiang	2006	Cotton Science	113.927	35.3252	Gossypium spp	Dicotyledons	Malvaceae	Woody	Bud stage	Mid period	Pn	0.55	Medium stress	20d	Short-term coercion	4	4	12.21	2.442	15.06	3.012
35	800	ZHANG Jiyang, LIU Zugui, DUAN Aiwang, MENG Zhangjiang	2006	Cotton Science	113.927	35.3252	Gossypium spp	Dicotyledons	Malvaceae	Woody	Bud stage	Mid period	Pn	0.45	Heavy stress	20d	Short-term coercion	4	4	8.98	1.796	15.06	3.012
35	801	ZHANG Jiyang, LIU Zugui, DUAN Aiwang, MENG Zhangjiang	2006	Cotton Science	113.927	35.3252	Gossypium spp	Dicotyledons	Malvaceae	Woody	Seedling stage	Preceding period	Tr	0.55	Medium stress	20d	Short-term coercion	4	4	3.84	0.768	4.26	0.852
35	802	ZHANG Jiyang, LIU Zugui, DUAN Aiwang, MENG Zhangjiang	2006	Cotton Science	113.927	35.3252	Gossypium spp	Dicotyledons	Malvaceae	Woody	Seedling stage	Preceding period	Tr	0.45	Heavy stress	20d	Short-term coercion	4	4	3.46	0.692	4.26	0.852
35	803	ZHANG Jiyang, LIU Zugui, DUAN Aiwang, MENG Zhangjiang	2006	Cotton Science	113.927	35.3252	Gossypium spp	Dicotyledons	Malvaceae	Woody	Bud stage	Mid period	Tr	0.55	Medium stress	20d	Short-term coercion	4	4	3.05	0.61	4.38	0.876
35	804	ZHANG Jiyang, LIU Zugui, DUAN Aiwang, MENG Zhangjiang	2006	Cotton Science	113.927	35.3252	Gossypium spp	Dicotyledons	Malvaceae	Woody	Bud stage	Mid period	Tr	0.45	Heavy stress	20d	Short-term coercion	4	4	2.23	0.446	4.38	0.876
35	805	ZHANG Jiyang, LIU Zugui, DUAN Aiwang, MENG Zhangjiang	2006	Cotton Science	113.927	35.3252	Gossypium spp	Dicotyledons	Malvaceae	Woody	Seedling stage	Preceding period	Gs	0.55	Medium stress	20d	Short-term coercion	4	4	1.472	0.2944	1.496	0.2992
35	806	ZHANG Jiyang, LIU Zugui, DUAN Aiwang, MENG Zhangjiang	2006	Cotton Science	113.927	35.3252	Gossypium spp	Dicotyledons	Malvaceae	Woody	Seedling stage	Preceding period	Gs	0.45	Heavy stress	20d	Short-term coercion	4	4	1.373	0.2746	1.496	0.2992
35	807	ZHANG Jiyang, LIU Zugui, DUAN Aiwang, MENG Zhangjiang	2006	Cotton Science	113.927	35.3252	Gossypium spp	Dicotyledons	Malvaceae	Woody	Bud stage	Mid period	Gs	0.55	Medium stress	20d	Short-term coercion	4	4	0.914	0.1828	1.137	0.2274
35	808	ZHANG Jiyang, LIU Zugui, DUAN Aiwang, MENG Zhangjiang	2006	Cotton Science	113.927	35.3252	Gossypium spp	Dicotyledons	Malvaceae	Woody	Bud stage	Mid period	Gs	0.45	Heavy stress	20d	Short-term coercion	4	4	0.592	0.1184	1.137	0.2274
35	809	ZHANG Jiyang, LIU Zugui, DUAN Aiwang, MENG Zhangjiang	2006	Cotton Science	113.927	35.3252	Gossypium spp	Dicotyledons	Malvaceae	Woody	Seedling stage	Preceding period	Yield	0.55	Medium stress	20d	Short-term coercion	4	4	39.82	7.964	40.22	8.044
35	810	ZHANG Jiyang, LIU Zugui, DUAN Aiwang, MENG Zhangjiang	2006	Cotton Science	113.927	35.3252	Gossypium spp	Dicotyledons	Malvaceae	Woody	Seedling stage	Preceding period	Yield	0.45	Heavy stress	20d	Short-term coercion	4	4	37.26	7.452	40.22	8.044
35	811	ZHANG Jiyang, LIU Zugui, DUAN Aiwang, MENG Zhangjiang	2006	Cotton Science	113.927	35.3252	Gossypium spp	Dicotyledons	Malvaceae	Woody	Bud stage	Mid period	Yield	0.55	Medium stress	20d	Short-term coercion	4	4	34.32	6.864	40.22	8.044
35	812	ZHANG Jiyang, LIU Zugui, DUAN Aiwang, MENG Zhangjiang	2006	Cotton Science	113.927	35.3252	Gossypium spp	Dicotyledons	Malvaceae	Woody	Bud stage	Mid period	Yield	0.45	Heavy stress	20d	Short-term coercion	4	4	26.54	5.308	40.22	8.044
35	813	ZHANG Jiyang, LIU Zugui, DUAN Aiwang, MENG Zhangjiang	2006	Cotton Science	113.927	35.3252	Gossypium spp	Dicotyledons	Malvaceae	Woody	Seedling stage	Preceding period	WUE	0.55	Medium stress	20d	Short-term coercion	4	4	0.55	0.11	0.5	0.1
35	814	ZHANG Jiyang, LIU Zugui, DUAN Aiwang, MENG Zhangjiang	2006	Cotton Science	113.927	35.3252	Gossypium spp	Dicotyledons	Malvaceae	Woody	Seedling stage	Preceding period	WUE	0.45	Heavy stress	20d	Short-term coercion	4	4	0.54	0.108	0.5	0.1
35	815	ZHANG Jiyang, LIU Zugui, DUAN Aiwang, MENG Zhangjiang	2006	Cotton Science	113.927	35.3252	Gossypium spp	Dicotyledons	Malvaceae	Woody	Bud stage	Mid period	WUE	0.55	Medium stress	20d	Short-term coercion	4	4	0.51	0.102	0.5	0.1
35	816	ZHANG Jiyang, LIU Zugui, DUAN Aiwang, MENG Zhangjiang	2006	Cotton Science	113.927	35.3252	Gossypium spp	Dicotyledons	Malvaceae	Woody	Bud stage	Mid period	WUE	0.45	Heavy stress	20d	Short-term coercion	4	4	0.42	0.084	0.5	0.1
36	817	LIU Yijian, REN Jianhong, YIN Lina, DENG Xiping, KE Qingbo, WANG Shiwen	2019	Chinese Journal of Applied Ecology	108.082	34.2803	Solanum tuberosum L.	Dicotyledons	Solanaceae	Herbaceous	Tuber expansion stage	Later period	Biomass	0.55	Medium stress	15d	Short-term coercion	3	3	191.17	5.85433	172.07	12.644
36	818	LIU Yijian, REN Jianhong, YIN Lina, DENG Xiping, KE Qingbo, WANG Shiwen	2019	Chinese Journal of Applied Ecology	108.082	34.2803	Solanum tuberosum L.	Dicotyledons	Solanaceae	Herbaceous	Tuber expansion stage	Later period	Biomass	0.45	Heavy stress	15d	Short-term coercion	3	3	176.63	16.6623	172.07	12.644
36	819	LIU Yijian, REN Jianhong, YIN Lina, DENG Xiping, KE Qingbo, WANG Shiwen	2019	Chinese Journal of Applied Ecology	108.082	34.2803	Solanum tuberosum L.	Dicotyledons	Solanaceae	Herbaceous	Tuber expansion stage	Later period	Biomass	0.35	Heavy stress	15d	Short-term coercion	3	3	166.33	13.1809	172.07	12.644
36	820	LIU Yijian, REN Jianhong, YIN Lina, DENG Xiping, KE Qingbo, WANG Shiwen	2019	Chinese Journal of Applied Ecology	108.082	34.2803	Solanum tuberosum L.	Dicotyledons	Solanaceae	Herbaceous	Tuber expansion stage	Later period	WUE	0.55	Medium stress	15d	Short-term coercion	3	3	1.81	0.225167	1.54	0.190526
36	821	LIU Yijian, REN Jianhong, YIN Lina, DENG Xiping, KE Qingbo, WANG Shiwen	2019	Chinese Journal of Applied Ecology	108.082	34.2803	Solanum tuberosum L.	Dicotyledons	Solanaceae	Herbaceous	Tuber expansion stage	Later period	WUE	0.45	Heavy stress	15d	Short-term coercion	3	3	1.67	0.242487	1.54	0.190526
36	822	LIU Yijian, REN Jianhong, YIN Lina, DENG Xiping, KE Qingbo, WANG Shiwen	2019	Chinese Journal of Applied Ecology	108.082	34.2803	Solanum tuberosum L.	Dicotyledons	Solanaceae	Herbaceous	Tuber expansion stage	Later period	WUE	0.35	Heavy stress	15d	Short-term coercion	3	3	1.62	0.155885	1.54	0.190526
36	823	LIU Yijian, REN Jianhong, YIN Lina, DENG Xiping, KE Qingbo, WANG Shiwen	2019	Chinese Journal of Applied Ecology	108.082	34.2803	Solanum tuberosum L.	Dicotyledons	Solanaceae	Herbaceous	Tuber expansion stage	Later period	Yield	0.55	Medium stress	15d	Short-term coercion	3	3	144.99	5.69845	136.38	13.3714
36	824	LIU Yijian, REN Jianhong, YIN Lina, DENG Xiping, KE Qingbo, WANG Shiwen	2019	Chinese Journal of Applied Ecology	108.082	34.2803	Solanum tuberosum L.	Dicotyledons	Solanaceae	Herbaceous	Tuber expansion stage	Later period	Yield	0.45	Heavy stress	15d	Short-term coercion	3	3	138.41	10.5828	136.38	13.3714
36	825	LIU Yijian, REN Jianhong, YIN Lina, DENG Xiping, KE Qingbo, WANG Shiwen	2019	Chinese Journal of Applied Ecology	108.082	34.2803	Solanum tuberosum L.	Dicotyledons	Solanaceae	Herbaceous	Tuber expansion stage	Later period	Yield	0.35	Heavy stress	15d	Short-term coercion	3	3	120.11	2.63272	136.38	13.3714
36	826	LIU Yijian, REN Jianhong, YIN Lina, DENG Xiping, KE Qingbo, WANG Shiwen	2019	Chinese Journal of Applied Ecology	108.082	34.2803	Solanum tuberosum L.	Dicotyledons	Solanaceae	Herbaceous	Tuber expansion stage	Later period	Pn	0.55	Medium stress	15d	Short-term coercion	3	3	18.8193	1.25208	17.6145	1.66945
36	827	LIU Yijian, REN Jianhong, YIN Lina, DENG Xiping, KE Qingbo, WANG Shiwen	2019	Chinese Journal of Applied Ecology	108.082	34.2803	Solanum tuberosum L.	Dicotyledons	Solanaceae	Herbaceous	Tuber expansion stage	Later period	Pn	0.45	Heavy stress	15d	Short-term coercion	3	3	17.9759	1.0434	17.6145	1.66945
36	828	LIU Yijian, REN Jianhong, YIN Lina, DENG Xiping, KE Qingbo, WANG Shiwen	2019	Chinese Journal of Applied Ecology	108.082	34.2803	Solanum tuberosum L.	Dicotyledons	Solanaceae	Herbaceous	Tuber expansion stage	Later period	Pn	0.35	Heavy stress	15d	Short-term coercion	3	3	15.5663	2.50417	17.6145	1.66945
36	829	LIU Yijian, REN Jianhong, YIN Lina, DENG Xiping, KE Qingbo, WANG Shiwen	2019	Chinese Journal of Applied Ecology	108.082	34.2803	Solanum tuberosum L.	Dicotyledons	Solanaceae	Herbaceous	Tuber expansion stage	Later period	Tr	0.55	Medium stress	15d	Short-term coercion	3	3	6.09677	0.502853	5.26935	1.15656
36	830	LIU Yijian, REN Jianhong, YIN Lina, DENG Xiping, KE Qingbo, WANG Shiwen	2019	Chinese Journal of Applied Ecology	108.082	34.2803	Solanum tuberosum L.	Dicotyledons	Solanaceae	Herbaceous	Tuber expansion stage	Later period	Tr	0.45	Heavy stress	15d	Short-term coercion	3	3	5.42903	1.15656	5.26935	1.15656
36	831	LIU Yijian, REN Jianhong, YIN Lina, DENG Xiping, KE Qingbo, WANG Shiwen	2019	Chinese Journal of Applied Ecology	108.082	34.2803	Solanum tuberosum L.	Dicotyledons	Solanaceae	Herbaceous	Tuber expansion stage	Later period	Tr	0.35	Heavy stress	15d	Short-term coercion	3	3	4.4129	0.703995	5.26935	1.15656
36	832	LIU Yijian, REN Jianhong, YIN Lina, DENG Xiping, KE Qingbo, WANG Shiwen	2019	Chinese Journal of Applied Ecology	108.082	34.2803	Solanum tuberosum L.	Dicotyledons	Solanaceae	Herbaceous	Tuber expansion stage	Later period	Gs	0.55	Medium stress	15d	Short-term coercion	3	3	0.31136	0.0969948	0.28224	0.0271586
36	833	LIU Yijian, REN Jianhong, YIN Lina, DENG Xiping, KE Qingbo, WANG Shiwen	2019	Chinese Journal of Applied Ecology	108.082	34.2803	Solanum tuberosum L.	Dicotyledons	Solanaceae	Herbaceous	Tuber expansion stage	Later period	Gs	0.45	Heavy stress	15d	Short-term coercion	3	3	0.28896	0.0465575	0.28224	0.0271586
36	834	LIU Yijian, REN Jianhong, YIN Lina, DENG Xiping, KE Qingbo, WANG Shiwen	2019	Chinese Journal of Applied Ecology	108.082	34.2803	Solanum tuberosum L.	Dicotyledons	Solanaceae	Herbaceous	Tuber expansion stage	Later period	Gs	0.35	Heavy stress	15d	Short-term coercion	3	3	0.20272	0.0387979	0.28224	0.0271586
36	835	LIU Yijian, REN Jianhong, YIN Lina, DENG Xiping, KE Qingbo, WANG Shiwen	2019	Chinese Journal of Applied Ecology	108.082	34.2803	Solanum tuberosum L.	Dicotyledons	Solanaceae	Herbaceous	Tuber expansion stage	Later period	Ci	0.55	Medium stress	15d	Short-term coercion	3	3	280.723	15.025	256.627	6.67779
36	836	LIU Yijian, REN Jianhong, YIN Lina, DENG Xiping, KE Qingbo, WANG Shiwen	2019	Chinese Journal of Applied Ecology	108.082	34.2803	Solanum tuberosum L.	Dicotyledons	Solanaceae	Herbaceous	Tuber expansion stage	Later period	Ci	0.45	Heavy stress	15d	Short-term coercion	3	3	272.048	5.00834	256.627	6.67779
36	837	LIU Yijian, REN Jianhong, YIN Lina, DENG Xiping, KE Qingbo, WANG Shiwen	2019	Chinese Journal of Applied Ecology	108.082	34.2803	Solanum tuberosum L.	Dicotyledons	Solanaceae	Herbaceous	Tuber expansion stage	Later period	Ci	0.35	Heavy stress	15d	Short-term coercion	3	3	228.193	16.6945	256.627	6.67779
36	838	LIU Yijian, REN Jianhong, YIN Lina, DENG Xiping, KE Qingbo, WANG Shiwen	2019	Chinese Journal of Applied Ecology	108.082	34.2803	Solanum tuberosum L.	Dicotyledons	Solanaceae	Herbaceous	Tuber expansion stage	Later period	Starch	0.55	Medium stress	15d	Short-term coercion	3	3	296.452	25.1427	262.581	19.5554
36	839	LIU Yijian, REN Jianhong, YIN Lina, DENG Xiping, KE Qingbo, WANG Shiwen	2019	Chinese Journal of Applied Ecology	108.082	34.2803	Solanum tuberosum L.	Dicotyledons	Solanaceae	Herbaceous	Tuber expansion stage	Later period	Starch	0.45	Heavy stress	15d	Short-term coercion	3	3	283.145	33.5236	262.581	19.5554
36	840	LIU Yijian, REN Jianhong, YIN Lina, DENG Xiping, KE Qingbo, WANG Shiwen	2019	Chinese Journal of Applied Ecology	108.082	34.2803	Solanum tuberosum L.	Dicotyledons	Solanaceae	Herbaceous	Tuber expansion stage	Later period	Starch	0.35	Heavy stress	15d	Short-term coercion	3	3	218.629	29.3331	262.581	19.5554
37	841	LIU Sujun, MENG Lili, MENG Meiliang, CHEN Youjun	2015	Journal of Irrigation and Drainage	111.614	41.1701	Solanum tuberosum L.	Dicotyledons	Solanaceae	Herbaceous	Tuber forming stage	Mid period	RWC	0.3	Heavy stress	21d	Medium-term stress	3	3	75.05	12.999	83.91	14.5336
37	842	LIU Sujun, MENG Lili, MENG Meiliang, CHEN Youjun	2015	Journal of Irrigation and Drainage	111.614	41.1701	Solanum tuberosum L.	Dicotyledons	Solanaceae	Herbaceous	Tuber forming stage	Mid period	RWC	0.45	Heavy stress	21d	Medium-term stress	3	3	77.08	13.3506	83.91	14.5336
37	843	LIU Sujun, MENG Lili, MENG Meiliang, CHEN Youjun	2015	Journal of Irrigation and Drainage	111.614	41.1701	Solanum tuberosum L.	Dicotyledons	Solanaceae	Herbaceous	Tuber forming stage	Mid period	RWC	0.6	Medium stress	21d	Medium-term stress	3	3	80.94	14.0192	83.91	14.5336
37	844	LIU Sujun, MENG Lili, MENG Meiliang, CHEN Youjun	2015	Journal of Irrigation and Drainage	111.614	41.1701	Solanum tuberosum L.	Dicotyledons	Solanaceae	Herbaceous	Tuber forming stage	Mid period	Leaf relative conductivity	0.3	Heavy stress	21d	Medium-term stress	3	3	0.4	0.069282	0.17	0.0294449
37	845	LIU Sujun, MENG Lili, MENG Meiliang, CHEN Youjun	2015	Journal of Irrigation and Drainage	111.614	41.1701	Solanum tuberosum L.	Dicotyledons	Solanaceae	Herbaceous	Tuber forming stage	Mid period	Leaf relative conductivity	0.45	Heavy stress	21d	Medium-term stress	3	3	0.35	0.0606218	0.17	0.0294449
37	846	LIU Sujun, MENG Lili, MENG Meiliang, CHEN Youjun	2015	Journal of Irrigation and Drainage	111.614	41.1701	Solanum tuberosum L.	Dicotyledons	Solanaceae	Herbaceous	Tuber forming stage	Mid period	Leaf relative conductivity	0.6	Medium stress	21d	Medium-term stress	3	3	0.16	0.0277128	0.17	0.0294449
37	847	LIU Sujun, MENG Lili, MENG Meiliang, CHEN Youjun	2015	Journal of Irrigation and Drainage	111.614	41.1701	Solanum tuberosum L.	Dicotyledons	Solanaceae	Herbaceous	Tuber forming stage	Mid period	SPAD	0.3	Heavy stress	21d	Medium-term stress	3	3	16.8	2.90985	50.18	8.69143
37	848	LIU Sujun, MENG Lili, MENG Meiliang, CHEN Youjun	2015	Journal of Irrigation and Drainage	111.614	41.1701	Solanum tuberosum L.	Dicotyledons	Solanaceae	Herbaceous	Tuber forming stage	Mid period	SPAD	0.45	Heavy stress	21d	Medium-term stress	3	3	20.3	3.51606	50.18	8.69143
37	849	LIU Sujun, MENG Lili, MENG Meiliang, CHEN Youjun	2015	Journal of Irrigation and Drainage	111.614	41.1701	Solanum tuberosum L.	Dicotyledons	Solanaceae	Herbaceous	Tuber forming stage	Mid period	SPAD	0.6	Medium stress	21d	Medium-term stress	3	3	48.9	8.46973	50.18	8.69143
37	850	LIU Sujun, MENG Lili, MENG Meiliang, CHEN Youjun	2015	Journal of Irrigation and Drainage	111.614	41.1701	Solanum tuberosum L.	Dicotyledons	Solanaceae	Herbaceous	Tuber forming stage	Mid period	Proline	0.3	Heavy stress	21d	Medium-term stress	3	3	94.58	16.3817	75.23	13.0302
37	851	LIU Sujun, MENG Lili, MENG Meiliang, CHEN Youjun	2015	Journal of Irrigation and Drainage	111.614	41.1701	Solanum tuberosum L.	Dicotyledons	Solanaceae	Herbaceous	Tuber forming stage	Mid period	Proline	0.45	Heavy stress	21d	Medium-term stress	3	3	83.01	14.3778	75.23	13.0302
37	852	LIU Sujun, MENG Lili, MENG Meiliang, CHEN Youjun	2015	Journal of Irrigation and Drainage	111.614	41.1701	Solanum tuberosum L.	Dicotyledons	Solanaceae	Herbaceous	Tuber forming stage	Mid period	Proline	0.6	Medium stress	21d	Medium-term stress	3	3	76.87	13.3143	75.23	13.0302
37	853	LIU Sujun, MENG Lili, MENG Meiliang, CHEN Youjun	2015	Journal of Irrigation and Drainage	111.614	41.1701	Solanum tuberosum L.	Dicotyledons	Solanaceae	Herbaceous	Tuber forming stage	Mid period	MDA	0.3	Heavy stress	21d	Medium-term stress	3	3	22.4	3.87979	16.61	2.87694
37	854	LIU Sujun, MENG Lili, MENG Meiliang, CHEN Youjun	2015	Journal of Irrigation and Drainage	111.614	41.1701	Solanum tuberosum L.	Dicotyledons	Solanaceae	Herbaceous	Tuber forming stage	Mid period	MDA	0.45	Heavy stress	21d	Medium-term stress	3	3	21.76	3.76894	16.61	2.87694
37	855	LIU Sujun, MENG Lili, MENG Meiliang, CHEN Youjun	2015	Journal of Irrigation and Drainage	111.614	41.1701	Solanum tuberosum L.	Dicotyledons	Solanaceae	Herbaceous	Tuber forming stage	Mid period	MDA	0.6	Medium stress	21d	Medium-term stress	3	3	17.97	3.1125	16.61	2.87694
37	856	LIU Sujun, MENG Lili, MENG Meiliang, CHEN Youjun	2015	Journal of Irrigation and Drainage	111.614	41.1701	Solanum tuberosum L.	Dicotyledons	Solanaceae	Herbaceous	Tuber forming stage	Mid period	Soluble sugar	0.3	Heavy stress	21d	Medium-term stress	3	3	0.33	0.0571577	0.24	0.0415692
37	857	LIU Sujun, MENG Lili, MENG Meiliang, CHEN Youjun	2015	Journal of Irrigation and Drainage	111.614	41.1701	Solanum tuberosum L.	Dicotyledons	Solanaceae	Herbaceous	Tuber forming stage	Mid period	Soluble sugar	0.45	Heavy stress	21d	Medium-term stress	3	3	0.28	0.0484974	0.24	0.0415692
37	858	LIU Sujun, MENG Lili, MENG Meiliang, CHEN Youjun	2015	Journal of Irrigation and Drainage	111.614	41.1701	Solanum tuberosum L.	Dicotyledons	Solanaceae	Herbaceous	Tuber forming stage	Mid period	SOD	0.3	Heavy stress	21d	Medium-term stress	3	3	2671.54	462.724	1851.88	320.755
37	859	LIU Sujun, MENG Lili, MENG Meiliang, CHEN Youjun	2015	Journal of Irrigation and Drainage	111.614	41.1701	Solanum tuberosum L.	Dicotyledons	Solanaceae	Herbaceous	Tuber forming stage	Mid period	SOD	0.45	Heavy stress	21d	Medium-term stress	3	3	2228.56	385.998	1851.88	320.755
37	860	LIU Sujun, MENG Lili, MENG Meiliang, CHEN Youjun	2015	Journal of Irrigation and Drainage	111.614	41.1701	Solanum tuberosum L.	Dicotyledons	Solanaceae	Herbaceous	Tuber forming stage	Mid period	SOD	0.6	Medium stress	21d	Medium-term stress	3	3	1939.07	335.857	1851.88	320.755
37	861	LIU Sujun, MENG Lili, MENG Meiliang, CHEN Youjun	2015	Journal of Irrigation and Drainage	111.614	41.1701	Solanum tuberosum L.	Dicotyledons	Solanaceae	Herbaceous	Tuber forming stage	Mid period	CAT	0.3	Heavy stress	21d	Medium-term stress	3	3	2.81	0.486706	1.17	0.20265
37	862	LIU Sujun, MENG Lili, MENG Meiliang, CHEN Youjun	2015	Journal of Irrigation and Drainage	111.614	41.1701	Solanum tuberosum L.	Dicotyledons	Solanaceae	Herbaceous	Tuber forming stage	Mid period	CAT	0.45	Heavy stress	21d	Medium-term stress	3	3	1.89	0.327358	1.17	0.20265
37	863	LIU Sujun, MENG Lili, MENG Meiliang, CHEN Youjun	2015	Journal of Irrigation and Drainage	111.614	41.1701	Solanum tuberosum L.	Dicotyledons	Solanaceae	Herbaceous	Tuber forming stage	Mid period	CAT	0.6	Medium stress	21d	Medium-term stress	3	3	1.29	0.223435	1.17	0.20265
37	864	LIU Sujun, MENG Lili, MENG Meiliang, CHEN Youjun	2015	Journal of Irrigation and Drainage	111.614	41.1701	Solanum tuberosum L.	Dicotyledons	Solanaceae	Herbaceous	Tuber forming stage	Mid period	Root vigor	0.3	Heavy stress	21d	Medium-term stress	3	3	3.21	0.555988	19.31	3.34459
37	865	LIU Sujun, MENG Lili, MENG Meiliang, CHEN Youjun	2015	Journal of Irrigation and Drainage	111.614	41.1701	Solanum tuberosum L.	Dicotyledons	Solanaceae	Herbaceous	Tuber forming stage	Mid period	Root vigor	0.45	Heavy stress	21d	Medium-term stress	3	3	3.77	0.652983	19.31	3.34459
37	866	LIU Sujun, MENG Lili, MENG Meiliang, CHEN Youjun	2015	Journal of Irrigation and Drainage	111.614	41.1701	Solanum tuberosum L.	Dicotyledons	Solanaceae	Herbaceous	Tuber forming stage	Mid period	Root vigor	0.6	Medium stress	21d	Medium-term stress	3	3	19.17	3.32034	19.31	3.34459
37	867	LIU Sujun, MENG Lili, MENG Meiliang, CHEN Youjun	2015	Journal of Irrigation and Drainage	111.614	41.1701	Solanum tuberosum L.	Dicotyledons	Solanaceae	Herbaceous	Tuber forming stage	Mid period	Yield	0.3	Heavy stress	21d	Medium-term stress	3	3	14274.7	2063.98	34068.4	3139.24
37	868	LIU Sujun, MENG Lili, MENG Meiliang, CHEN Youjun	2015	Journal of Irrigation and Drainage	111.614	41.1701	Solanum tuberosum L.	Dicotyledons	Solanaceae	Herbaceous	Tuber forming stage	Mid period	Yield	0.45	Heavy stress	21d	Medium-term stress	3	3	18509.2	846.956	34068.4	3139.24
37	869	LIU Sujun, MENG Lili, MENG Meiliang, CHEN Youjun	2015	Journal of Irrigation and Drainage	111.614	41.1701	Solanum tuberosum L.	Dicotyledons	Solanaceae	Herbaceous	Tuber forming stage	Mid period	Yield	0.6	Medium stress	21d	Medium-term stress	3	3	24305.1	6275.69	34068.4	3139.24
38	870	LI Xuan, ZHANG Henjia, LI Fuqiang, WANG Yayun, SHI Yuanyuan	2017	China Water Transport	100.814	38.441	Capsicum annuum L.	Dicotyledons	Solanaceae	Woody	Seedling stage	Preceding period	Yield	0.65	Medium stress	15d	Short-term coercion	3	3	32583.8	5643.68	33634.3	5825.64
38	871	LI Xuan, ZHANG Henjia, LI Fuqiang, WANG Yayun, SHI Yuanyuan	2017	China Water Transport	100.814	38.441	Capsicum annuum L.	Dicotyledons	Solanaceae	Woody	Seedling stage	Preceding period	Yield	0.55	Medium stress	15d	Short-term coercion	3	3	31320	5424.78	33634.3	5825.64
38	872	LI Xuan, ZHANG Henjia, LI Fuqiang, WANG Yayun, SHI Yuanyuan	2017	China Water Transport	100.814	38.441	Capsicum annuum L.	Dicotyledons	Solanaceae	Woody	Seedling stage	Preceding period	Yield	0.45	Heavy stress	15d	Short-term coercion	3	3	26003.1	4503.87	33634.3	5825.64
38	873	LI Xuan, ZHANG Henjia, LI Fuqiang, WANG Yayun, SHI Yuanyuan	2017	China Water Transport	100.814	38.441	Capsicum annuum L.	Dicotyledons	Solanaceae	Woody	The flowering period	Mid period	Yield	0.65	Medium stress	15d	Short-term coercion	3	3	30427	5270.11	33634.3	5825.64
38	874	LI Xuan, ZHANG Henjia, LI Fuqiang, WANG Yayun, SHI Yuanyuan	2017	China Water Transport	100.814	38.441	Capsicum annuum L.	Dicotyledons	Solanaceae	Woody	The flowering period	Mid period	Yield	0.55	Medium stress	15d	Short-term coercion	3	3	28472.5	4931.57	33634.3	5825.64
38	875	LI Xuan, ZHANG Henjia, LI Fuqiang, WANG Yayun, SHI Yuanyuan	2017	China Water Transport	100.814	38.441	Capsicum annuum L.	Dicotyledons	Solanaceae	Woody	The flowering period	Mid period	Yield	0.45	Heavy stress	15d	Short-term coercion	3	3	23563.2	4081.27	33634.3	5825.64
38	876	LI Xuan, ZHANG Henjia, LI Fuqiang, WANG Yayun, SHI Yuanyuan	2017	China Water Transport	100.814	38.441	Capsicum annuum L.	Dicotyledons	Solanaceae	Woody	Seedling stage	Preceding period	WUE	0.65	Medium stress	15d	Short-term coercion	3	3	127.32	22.0525	122.44	21.2072
38	877	LI Xuan, ZHANG Henjia, LI Fuqiang, WANG Yayun, SHI Yuanyuan	2017	China Water Transport	100.814	38.441	Capsicum annuum L.	Dicotyledons	Solanaceae	Woody	Seedling stage	Preceding period	WUE	0.55	Medium stress	15d	Short-term coercion	3	3	133.04	23.0432	122.44	21.2072
38	878	LI Xuan, ZHANG Henjia, LI Fuqiang, WANG Yayun, SHI Yuanyuan	2017	China Water Transport	100.814	38.441	Capsicum annuum L.	Dicotyledons	Solanaceae	Woody	Seedling stage	Preceding period	WUE	0.45	Heavy stress	15d	Short-term coercion	3	3	126.26	21.8689	122.44	21.2072
38	879	LI Xuan, ZHANG Henjia, LI Fuqiang, WANG Yayun, SHI Yuanyuan	2017	China Water Transport	100.814	38.441	Capsicum annuum L.	Dicotyledons	Solanaceae	Woody	The flowering period	Mid period	WUE	0.65	Medium stress	15d	Short-term coercion	3	3	126.15	21.8498	122.44	21.2072
38	880	LI Xuan, ZHANG Henjia, LI Fuqiang, WANG Yayun, SHI Yuanyuan	2017	China Water Transport	100.814	38.441	Capsicum annuum L.	Dicotyledons	Solanaceae	Woody	The flowering period	Mid period	WUE	0.55	Medium stress	15d	Short-term coercion	3	3	122.11	21.1501	122.44	21.2072
38	881	LI Xuan, ZHANG Henjia, LI Fuqiang, WANG Yayun, SHI Yuanyuan	2017	China Water Transport	100.814	38.441	Capsicum annuum L.	Dicotyledons	Solanaceae	Woody	The flowering period	Mid period	WUE	0.45	Heavy stress	15d	Short-term coercion	3	3	118.48	20.5213	122.44	21.2072
38	882	LI Xuan, ZHANG Henjia, LI Fuqiang, WANG Yayun, SHI Yuanyuan	2017	China Water Transport	100.814	38.441	Capsicum annuum L.	Dicotyledons	Solanaceae	Woody	Seedling stage	Preceding period	Plant height	0.65	Medium stress	15d	Short-term coercion	3	3	53.3122	9.23395	54.5781	9.4532
38	883	LI Xuan, ZHANG Henjia, LI Fuqiang, WANG Yayun, SHI Yuanyuan	2017	China Water Transport	100.814	38.441	Capsicum annuum L.	Dicotyledons	Solanaceae	Woody	Seedling stage	Preceding period	Plant height	0.55	Medium stress	15d	Short-term coercion	3	3	46.8143	8.10848	55.5781	9.6264
38	884	LI Xuan, ZHANG Henjia, LI Fuqiang, WANG Yayun, SHI Yuanyuan	2017	China Water Transport	100.814	38.441	Capsicum annuum L.	Dicotyledons	Solanaceae	Woody	Seedling stage	Preceding period	Plant height	0.45	Heavy stress	15d	Short-term coercion	3	3	39.8101	6.89532	56.5781	9.79961
38	885	LI Xuan, ZHANG Henjia, LI Fuqiang, WANG Yayun, SHI Yuanyuan	2017	China Water Transport	100.814	38.441	Capsicum annuum L.	Dicotyledons	Solanaceae	Woody	The flowering period	Mid period	Plant height	0.65	Medium stress	15d	Short-term coercion	3	3	52.1308	9.02932	57.5781	9.97281
38	886	LI Xuan, ZHANG Henjia, LI Fuqiang, WANG Yayun, SHI Yuanyuan	2017	China Water Transport	100.814	38.441	Capsicum annuum L.	Dicotyledons	Solanaceae	Woody	The flowering period	Mid period	Plant height	0.55	Medium stress	15d	Short-term coercion	3	3	44.5359	7.71384	58.5781	10.146
38	887	LI Xuan, ZHANG Henjia, LI Fuqiang, WANG Yayun, SHI Yuanyuan	2017	China Water Transport	100.814	38.441	Capsicum annuum L.	Dicotyledons	Solanaceae	Woody	The flowering period	Mid period	Plant height	0.45	Heavy stress	15d	Short-term coercion	3	3	33.3966	5.78447	59.5781	10.3192
38	888	LI Xuan, ZHANG Henjia, LI Fuqiang, WANG Yayun, SHI Yuanyuan	2017	China Water Transport	100.814	38.441	Capsicum annuum L.	Dicotyledons	Solanaceae	Woody	Seedling stage	Preceding period	Stem thickness	0.65	Medium stress	15d	Short-term coercion	3	3	15.2066	2.63386	16.0496	2.77987
38	889	LI Xuan, ZHANG Henjia, LI Fuqiang, WANG Yayun, SHI Yuanyuan	2017	China Water Transport	100.814	38.441	Capsicum annuum L.	Dicotyledons	Solanaceae	Woody	Seedling stage	Preceding period	Stem thickness	0.55	Medium stress	15d	Short-term coercion	3	3	14.6116	2.5308	16.0496	2.77987
38	890	LI Xuan, ZHANG Henjia, LI Fuqiang, WANG Yayun, SHI Yuanyuan	2017	China Water Transport	100.814	38.441	Capsicum annuum L.	Dicotyledons	Solanaceae	Woody	Seedling stage	Preceding period	Stem thickness	0.45	Heavy stress	15d	Short-term coercion	3	3	12.4793	2.16148	16.0496	2.77987
38	891	LI Xuan, ZHANG Henjia, LI Fuqiang, WANG Yayun, SHI Yuanyuan	2017	China Water Transport	100.814	38.441	Capsicum annuum L.	Dicotyledons	Solanaceae	Woody	The flowering period	Mid period	Stem thickness	0.65	Medium stress	15d	Short-term coercion	3	3	13.2727	2.2989	16.0496	2.77987
38	892	LI Xuan, ZHANG Henjia, LI Fuqiang, WANG Yayun, SHI Yuanyuan	2017	China Water Transport	100.814	38.441	Capsicum annuum L.	Dicotyledons	Solanaceae	Woody	The flowering period	Mid period	Stem thickness	0.55	Medium stress	15d	Short-term coercion	3	3	12.6529	2.19155	16.0496	2.77987
38	893	LI Xuan, ZHANG Henjia, LI Fuqiang, WANG Yayun, SHI Yuanyuan	2017	China Water Transport	100.814	38.441	Capsicum annuum L.	Dicotyledons	Solanaceae	Woody	The flowering period	Mid period	Stem thickness	0.45	Heavy stress	15d	Short-term coercion	3	3	10.7686	1.86518	16.0496	2.77987
38	894	LI Xuan, ZHANG Henjia, LI Fuqiang, WANG Yayun, SHI Yuanyuan	2017	China Water Transport	100.814	38.441	Capsicum annuum L.	Dicotyledons	Solanaceae	Woody	Seedling stage	Preceding period	Dry matter	0.65	Medium stress	15d	Short-term coercion	3	3	98.5401	17.0677	100	17.3205
38	895	LI Xuan, ZHANG Henjia, LI Fuqiang, WANG Yayun, SHI Yuanyuan	2017	China Water Transport	100.814	38.441	Capsicum annuum L.	Dicotyledons	Solanaceae	Woody	Seedling stage	Preceding period	Dry matter	0.55	Medium stress	15d	Short-term coercion	3	3	93.2482	16.1511	100	17.3205
38	896	LI Xuan, ZHANG Henjia, LI Fuqiang, WANG Yayun, SHI Yuanyuan	2017	China Water Transport	100.814	38.441	Capsicum annuum L.	Dicotyledons	Solanaceae	Woody	Seedling stage	Preceding period	Dry matter	0.45	Heavy stress	15d	Short-term coercion	3	3	79.927	13.8438	100	17.3205
38	897	LI Xuan, ZHANG Henjia, LI Fuqiang, WANG Yayun, SHI Yuanyuan	2017	China Water Transport	100.814	38.441	Capsicum annuum L.	Dicotyledons	Solanaceae	Woody	The flowering period	Mid period	Dry matter	0.65	Medium stress	15d	Short-term coercion	3	3	88.5036	15.3293	100	17.3205
38	898	LI Xuan, ZHANG Henjia, LI Fuqiang, WANG Yayun, SHI Yuanyuan	2017	China Water Transport	100.814	38.441	Capsicum annuum L.	Dicotyledons	Solanaceae	Woody	The flowering period	Mid period	Dry matter	0.55	Medium stress	15d	Short-term coercion	3	3	68.6131	11.8841	100	17.3205
38	899	LI Xuan, ZHANG Henjia, LI Fuqiang, WANG Yayun, SHI Yuanyuan	2017	China Water Transport	100.814	38.441	Capsicum annuum L.	Dicotyledons	Solanaceae	Woody	The flowering period	Mid period	Dry matter	0.45	Heavy stress	15d	Short-term coercion	3	3	51.2774	8.8815	100	17.3205
39	900	WANG Liwei, TAN Yue, ZHANG Juncheng, KAN Yumeng, GUAN Lanzhong, WANG Tianning, SUN Yue, LIU Limin	2023	Chinese Journal of Agrometeorology	123.576	41.8327	Solanum tuberosum L.	Dicotyledons	Solanaceae	Herbaceous	The flowering period	Mid period	Yield	0.5	Medium stress	5d	Short-term coercion	3	3	49333.3	8544.78	49830.6	8630.91
39	901	WANG Liwei, TAN Yue, ZHANG Juncheng, KAN Yumeng, GUAN Lanzhong, WANG Tianning, SUN Yue, LIU Limin	2023	Chinese Journal of Agrometeorology	123.576	41.8327	Solanum tuberosum L.	Dicotyledons	Solanaceae	Herbaceous	The flowering period	Mid period	Yield	0.4	Heavy stress	5d	Short-term coercion	3	3	42161.1	7302.52	49830.6	8630.91
39	902	WANG Liwei, TAN Yue, ZHANG Juncheng, KAN Yumeng, GUAN Lanzhong, WANG Tianning, SUN Yue, LIU Limin	2023	Chinese Journal of Agrometeorology	123.576	41.8327	Solanum tuberosum L.	Dicotyledons	Solanaceae	Herbaceous	The flowering period	Mid period	Yield	0.3	Heavy stress	5d	Short-term coercion	3	3	40069.4	6940.22	49830.6	8630.91
39	903	WANG Liwei, TAN Yue, ZHANG Juncheng, KAN Yumeng, GUAN Lanzhong, WANG Tianning, SUN Yue, LIU Limin	2023	Chinese Journal of Agrometeorology	123.576	41.8327	Solanum tuberosum L.	Dicotyledons	Solanaceae	Herbaceous	Tuber expansion stage	Later period	Yield	0.6	Medium stress	5d	Short-term coercion	3	3	45556.9	7890.69	49830.6	8630.91
39	904	WANG Liwei, TAN Yue, ZHANG Juncheng, KAN Yumeng, GUAN Lanzhong, WANG Tianning, SUN Yue, LIU Limin	2023	Chinese Journal of Agrometeorology	123.576	41.8327	Solanum tuberosum L.	Dicotyledons	Solanaceae	Herbaceous	Tuber expansion stage	Later period	Yield	0.5	Medium stress	5d	Short-term coercion	3	3	38468.1	6662.87	49830.6	8630.91
39	905	WANG Liwei, TAN Yue, ZHANG Juncheng, KAN Yumeng, GUAN Lanzhong, WANG Tianning, SUN Yue, LIU Limin	2023	Chinese Journal of Agrometeorology	123.576	41.8327	Solanum tuberosum L.	Dicotyledons	Solanaceae	Herbaceous	Tuber expansion stage	Later period	Yield	0.4	Heavy stress	5d	Short-term coercion	3	3	34654.2	6002.28	49830.6	8630.91
39	906	WANG Liwei, TAN Yue, ZHANG Juncheng, KAN Yumeng, GUAN Lanzhong, WANG Tianning, SUN Yue, LIU Limin	2023	Chinese Journal of Agrometeorology	123.576	41.8327	Solanum tuberosum L.	Dicotyledons	Solanaceae	Herbaceous	The flowering period	Mid period	Gs	0.6	Medium stress	5d	Short-term coercion	3	3	0.341379	0.0418081	0.455172	0.107507
39	907	WANG Liwei, TAN Yue, ZHANG Juncheng, KAN Yumeng, GUAN Lanzhong, WANG Tianning, SUN Yue, LIU Limin	2023	Chinese Journal of Agrometeorology	123.576	41.8327	Solanum tuberosum L.	Dicotyledons	Solanaceae	Herbaceous	The flowering period	Mid period	Gs	0.5	Medium stress	5d	Short-term coercion	3	3	0.137931	0.0179178	0.455172	0.107507
39	908	WANG Liwei, TAN Yue, ZHANG Juncheng, KAN Yumeng, GUAN Lanzhong, WANG Tianning, SUN Yue, LIU Limin	2023	Chinese Journal of Agrometeorology	123.576	41.8327	Solanum tuberosum L.	Dicotyledons	Solanaceae	Herbaceous	The flowering period	Mid period	Gs	0.4	Heavy stress	5d	Short-term coercion	3	3	0.0896552	0.0358355	0.455172	0.107507
39	909	WANG Liwei, TAN Yue, ZHANG Juncheng, KAN Yumeng, GUAN Lanzhong, WANG Tianning, SUN Yue, LIU Limin	2023	Chinese Journal of Agrometeorology	123.576	41.8327	Solanum tuberosum L.	Dicotyledons	Solanaceae	Herbaceous	Tuber expansion stage	Later period	Gs	0.6	Medium stress	5d	Short-term coercion	3	3	0.343103	0.0537533	0.424138	0.0418081
39	910	WANG Liwei, TAN Yue, ZHANG Juncheng, KAN Yumeng, GUAN Lanzhong, WANG Tianning, SUN Yue, LIU Limin	2023	Chinese Journal of Agrometeorology	123.576	41.8327	Solanum tuberosum L.	Dicotyledons	Solanaceae	Herbaceous	Tuber expansion stage	Later period	Gs	0.5	Medium stress	5d	Short-term coercion	3	3	0.0655172	0.0597259	0.424138	0.0418081
39	911	WANG Liwei, TAN Yue, ZHANG Juncheng, KAN Yumeng, GUAN Lanzhong, WANG Tianning, SUN Yue, LIU Limin	2023	Chinese Journal of Agrometeorology	123.576	41.8327	Solanum tuberosum L.	Dicotyledons	Solanaceae	Herbaceous	Tuber expansion stage	Later period	Gs	0.4	Heavy stress	5d	Short-term coercion	3	3	0.0206897	0.0119452	0.424138	0.0418081
39	912	WANG Liwei, TAN Yue, ZHANG Juncheng, KAN Yumeng, GUAN Lanzhong, WANG Tianning, SUN Yue, LIU Limin	2023	Chinese Journal of Agrometeorology	123.576	41.8327	Solanum tuberosum L.	Dicotyledons	Solanaceae	Herbaceous	The flowering period	Mid period	Pn	0.6	Medium stress	5d	Short-term coercion	3	3	17.9487	3.33087	20.7532	3.33087
39	913	WANG Liwei, TAN Yue, ZHANG Juncheng, KAN Yumeng, GUAN Lanzhong, WANG Tianning, SUN Yue, LIU Limin	2023	Chinese Journal of Agrometeorology	123.576	41.8327	Solanum tuberosum L.	Dicotyledons	Solanaceae	Herbaceous	The flowering period	Mid period	Pn	0.5	Medium stress	5d	Short-term coercion	3	3	10.5769	3.33087	20.7532	3.33087
39	914	WANG Liwei, TAN Yue, ZHANG Juncheng, KAN Yumeng, GUAN Lanzhong, WANG Tianning, SUN Yue, LIU Limin	2023	Chinese Journal of Agrometeorology	123.576	41.8327	Solanum tuberosum L.	Dicotyledons	Solanaceae	Herbaceous	The flowering period	Mid period	Pn	0.4	Heavy stress	5d	Short-term coercion	3	3	8.01282	1.11029	20.7532	3.33087
39	915	WANG Liwei, TAN Yue, ZHANG Juncheng, KAN Yumeng, GUAN Lanzhong, WANG Tianning, SUN Yue, LIU Limin	2023	Chinese Journal of Agrometeorology	123.576	41.8327	Solanum tuberosum L.	Dicotyledons	Solanaceae	Herbaceous	Tuber expansion stage	Later period	Pn	0.6	Medium stress	5d	Short-term coercion	3	3	20.5128	3.33087	22.9167	3.60844
39	916	WANG Liwei, TAN Yue, ZHANG Juncheng, KAN Yumeng, GUAN Lanzhong, WANG Tianning, SUN Yue, LIU Limin	2023	Chinese Journal of Agrometeorology	123.576	41.8327	Solanum tuberosum L.	Dicotyledons	Solanaceae	Herbaceous	Tuber expansion stage	Later period	Pn	0.5	Medium stress	5d	Short-term coercion	3	3	7.13141	3.88601	22.9167	3.60844
39	917	WANG Liwei, TAN Yue, ZHANG Juncheng, KAN Yumeng, GUAN Lanzhong, WANG Tianning, SUN Yue, LIU Limin	2023	Chinese Journal of Agrometeorology	123.576	41.8327	Solanum tuberosum L.	Dicotyledons	Solanaceae	Herbaceous	Tuber expansion stage	Later period	Pn	0.4	Heavy stress	5d	Short-term coercion	3	3	7.05128	1.11029	22.9167	3.60844
39	918	WANG Liwei, TAN Yue, ZHANG Juncheng, KAN Yumeng, GUAN Lanzhong, WANG Tianning, SUN Yue, LIU Limin	2023	Chinese Journal of Agrometeorology	123.576	41.8327	Solanum tuberosum L.	Dicotyledons	Solanaceae	Herbaceous	The flowering period	Mid period	Dry matter	0.6	Medium stress	5d	Short-term coercion	3	3	96.7897	15.3392	122.251	12.7827
39	919	WANG Liwei, TAN Yue, ZHANG Juncheng, KAN Yumeng, GUAN Lanzhong, WANG Tianning, SUN Yue, LIU Limin	2023	Chinese Journal of Agrometeorology	123.576	41.8327	Solanum tuberosum L.	Dicotyledons	Solanaceae	Herbaceous	The flowering period	Mid period	Dry matter	0.5	Medium stress	5d	Short-term coercion	3	3	96.7897	10.2261	122.251	12.7827
39	920	WANG Liwei, TAN Yue, ZHANG Juncheng, KAN Yumeng, GUAN Lanzhong, WANG Tianning, SUN Yue, LIU Limin	2023	Chinese Journal of Agrometeorology	123.576	41.8327	Solanum tuberosum L.	Dicotyledons	Solanaceae	Herbaceous	The flowering period	Mid period	Dry matter	0.4	Heavy stress	5d	Short-term coercion	3	3	80.9225	7.6696	122.251	12.7827
39	921	WANG Liwei, TAN Yue, ZHANG Juncheng, KAN Yumeng, GUAN Lanzhong, WANG Tianning, SUN Yue, LIU Limin	2023	Chinese Journal of Agrometeorology	123.576	41.8327	Solanum tuberosum L.	Dicotyledons	Solanaceae	Herbaceous	Tuber expansion stage	Later period	Dry matter	0.6	Medium stress	5d	Short-term coercion	3	3	101.218	8.94786	116.716	7.6696
39	922	WANG Liwei, TAN Yue, ZHANG Juncheng, KAN Yumeng, GUAN Lanzhong, WANG Tianning, SUN Yue, LIU Limin	2023	Chinese Journal of Agrometeorology	123.576	41.8327	Solanum tuberosum L.	Dicotyledons	Solanaceae	Herbaceous	Tuber expansion stage	Later period	Dry matter	0.5	Medium stress	5d	Short-term coercion	3	3	85.7196	6.39133	116.716	7.6696
39	923	WANG Liwei, TAN Yue, ZHANG Juncheng, KAN Yumeng, GUAN Lanzhong, WANG Tianning, SUN Yue, LIU Limin	2023	Chinese Journal of Agrometeorology	123.576	41.8327	Solanum tuberosum L.	Dicotyledons	Solanaceae	Herbaceous	Tuber expansion stage	Later period	Dry matter	0.4	Heavy stress	5d	Short-term coercion	3	3	66.9004	10.2261	116.716	7.6696
40	924	WANG Lei, ZHANG Tong, DING Shengyan	2009	Chinese Bulletin of Botany	114.319	34.8275	Glycine max (L.) Merr.	Dicotyledons	Leguminosae	Herbaceous	The flowering period	Mid period	Pn	0.35	Heavy stress	3d	Short-term coercion	3	3	20.8273	3.03425	22.7737	4.3828
40	925	WANG Lei, ZHANG Tong, DING Shengyan	2009	Chinese Bulletin of Botany	114.319	34.8275	Glycine max (L.) Merr.	Dicotyledons	Leguminosae	Herbaceous	The flowering period	Mid period	Tr	0.35	Heavy stress	3d	Short-term coercion	3	3	6.56455	1.51602	5.57987	1.97082
40	926	WANG Lei, ZHANG Tong, DING Shengyan	2009	Chinese Bulletin of Botany	114.319	34.8275	Glycine max (L.) Merr.	Dicotyledons	Leguminosae	Herbaceous	The flowering period	Mid period	Ci	0.35	Heavy stress	3d	Short-term coercion	3	3	260.965	29.2473	241.009	23.9296
40	927	WANG Lei, ZHANG Tong, DING Shengyan	2009	Chinese Bulletin of Botany	114.319	34.8275	Glycine max (L.) Merr.	Dicotyledons	Leguminosae	Herbaceous	The flowering period	Mid period	Gs	0.35	Heavy stress	3d	Short-term coercion	3	3	0.390456	0.281787	0.536876	0.300573
41	928	JIANG Mengyuan, XUE Xiaoping, YANG Zaiqiang, ZHAO Hong, DONG Zhiqiang, XU Yi, ZOU Junli	2020	Chinese Journal of Agrometeorology	117.263	35.9723	Triticum aestivum L.	Monocotyledon	Graminae	Herbaceous	Jointing stage	Preceding period	RWC	0.5	Medium stress	16d	Short-term coercion	3	3	64.1	2.42487	66.4	2.59808
41	929	JIANG Mengyuan, XUE Xiaoping, YANG Zaiqiang, ZHAO Hong, DONG Zhiqiang, XU Yi, ZOU Junli	2020	Chinese Journal of Agrometeorology	117.263	35.9723	Triticum aestivum L.	Monocotyledon	Graminae	Herbaceous	Jointing stage	Preceding period	RWC	0.4	Heavy stress	16d	Short-term coercion	3	3	63.4	4.33013	66.4	2.59808
41	930	JIANG Mengyuan, XUE Xiaoping, YANG Zaiqiang, ZHAO Hong, DONG Zhiqiang, XU Yi, ZOU Junli	2020	Chinese Journal of Agrometeorology	117.263	35.9723	Triticum aestivum L.	Monocotyledon	Graminae	Herbaceous	Jointing stage	Preceding period	RWC	0.3	Heavy stress	16d	Short-term coercion	3	3	62.8	1.03923	66.4	2.59808
41	931	JIANG Mengyuan, XUE Xiaoping, YANG Zaiqiang, ZHAO Hong, DONG Zhiqiang, XU Yi, ZOU Junli	2020	Chinese Journal of Agrometeorology	117.263	35.9723	Triticum aestivum L.	Monocotyledon	Graminae	Herbaceous	Jointing stage	Preceding period	RWC	0.2	Heavy stress	16d	Short-term coercion	3	3	60.6	5.02295	66.4	2.59808
41	932	JIANG Mengyuan, XUE Xiaoping, YANG Zaiqiang, ZHAO Hong, DONG Zhiqiang, XU Yi, ZOU Junli	2020	Chinese Journal of Agrometeorology	117.263	35.9723	Triticum aestivum L.	Monocotyledon	Graminae	Herbaceous	Jointing stage	Preceding period	Leaf area	0.5	Medium stress	16d	Short-term coercion	3	3	57.5	9.35307	62.7	1.21244
41	933	JIANG Mengyuan, XUE Xiaoping, YANG Zaiqiang, ZHAO Hong, DONG Zhiqiang, XU Yi, ZOU Junli	2020	Chinese Journal of Agrometeorology	117.263	35.9723	Triticum aestivum L.	Monocotyledon	Graminae	Herbaceous	Jointing stage	Preceding period	Leaf area	0.4	Heavy stress	16d	Short-term coercion	3	3	60.3	5.19615	62.7	1.21244
41	934	JIANG Mengyuan, XUE Xiaoping, YANG Zaiqiang, ZHAO Hong, DONG Zhiqiang, XU Yi, ZOU Junli	2020	Chinese Journal of Agrometeorology	117.263	35.9723	Triticum aestivum L.	Monocotyledon	Graminae	Herbaceous	Jointing stage	Preceding period	Leaf area	0.3	Heavy stress	16d	Short-term coercion	3	3	59.7	9.52628	62.7	1.21244
41	935	JIANG Mengyuan, XUE Xiaoping, YANG Zaiqiang, ZHAO Hong, DONG Zhiqiang, XU Yi, ZOU Junli	2020	Chinese Journal of Agrometeorology	117.263	35.9723	Triticum aestivum L.	Monocotyledon	Graminae	Herbaceous	Jointing stage	Preceding period	Leaf area	0.2	Heavy stress	16d	Short-term coercion	3	3	49.4	11.2583	62.7	1.21244
41	936	JIANG Mengyuan, XUE Xiaoping, YANG Zaiqiang, ZHAO Hong, DONG Zhiqiang, XU Yi, ZOU Junli	2020	Chinese Journal of Agrometeorology	117.263	35.9723	Triticum aestivum L.	Monocotyledon	Graminae	Herbaceous	Jointing stage	Preceding period	Yield	0.5	Medium stress	16d	Short-term coercion	3	3	7242.8	1078.03	8641.6	811.639
41	937	JIANG Mengyuan, XUE Xiaoping, YANG Zaiqiang, ZHAO Hong, DONG Zhiqiang, XU Yi, ZOU Junli	2020	Chinese Journal of Agrometeorology	117.263	35.9723	Triticum aestivum L.	Monocotyledon	Graminae	Herbaceous	Jointing stage	Preceding period	Yield	0.4	Heavy stress	16d	Short-term coercion	3	3	6530.5	854.594	8641.6	811.639
41	938	JIANG Mengyuan, XUE Xiaoping, YANG Zaiqiang, ZHAO Hong, DONG Zhiqiang, XU Yi, ZOU Junli	2020	Chinese Journal of Agrometeorology	117.263	35.9723	Triticum aestivum L.	Monocotyledon	Graminae	Herbaceous	Jointing stage	Preceding period	Yield	0.3	Heavy stress	16d	Short-term coercion	3	3	6097.3	1389.8	8641.6	811.639
41	939	JIANG Mengyuan, XUE Xiaoping, YANG Zaiqiang, ZHAO Hong, DONG Zhiqiang, XU Yi, ZOU Junli	2020	Chinese Journal of Agrometeorology	117.263	35.9723	Triticum aestivum L.	Monocotyledon	Graminae	Herbaceous	Jointing stage	Preceding period	Yield	0.2	Heavy stress	16d	Short-term coercion	3	3	5786.6	1207.93	8641.6	811.639
41	940	JIANG Mengyuan, XUE Xiaoping, YANG Zaiqiang, ZHAO Hong, DONG Zhiqiang, XU Yi, ZOU Junli	2020	Chinese Journal of Agrometeorology	117.263	35.9723	Triticum aestivum L.	Monocotyledon	Graminae	Herbaceous	Jointing stage	Preceding period	chlorophyll content	0.5	Medium stress	16d	Short-term coercion	3	3	2.97842	0.411206	3.05396	0.448589
41	941	JIANG Mengyuan, XUE Xiaoping, YANG Zaiqiang, ZHAO Hong, DONG Zhiqiang, XU Yi, ZOU Junli	2020	Chinese Journal of Agrometeorology	117.263	35.9723	Triticum aestivum L.	Monocotyledon	Graminae	Herbaceous	Jointing stage	Preceding period	chlorophyll content	0.4	Heavy stress	16d	Short-term coercion	3	3	2.81655	0.373824	3.05396	0.448589
41	942	JIANG Mengyuan, XUE Xiaoping, YANG Zaiqiang, ZHAO Hong, DONG Zhiqiang, XU Yi, ZOU Junli	2020	Chinese Journal of Agrometeorology	117.263	35.9723	Triticum aestivum L.	Monocotyledon	Graminae	Herbaceous	Jointing stage	Preceding period	chlorophyll content	0.3	Heavy stress	16d	Short-term coercion	3	3	2.64388	0.448589	3.05396	0.448589
41	943	JIANG Mengyuan, XUE Xiaoping, YANG Zaiqiang, ZHAO Hong, DONG Zhiqiang, XU Yi, ZOU Junli	2020	Chinese Journal of Agrometeorology	117.263	35.9723	Triticum aestivum L.	Monocotyledon	Graminae	Herbaceous	Jointing stage	Preceding period	chlorophyll content	0.2	Heavy stress	16d	Short-term coercion	3	3	2.13669	0.411206	3.05396	0.448589
42	944	CHEN Xiaoyuan, LUO Yuanpei	2001	Acta Agronomica Sinica	116.294	40.0363	Triticum aestivum L.	Monocotyledon	Graminae	Herbaceous	The flowering period	Mid period	Plant height	0.55	Medium stress	10d	Short-term coercion	3	3	59.924	10.3791	67.9848	11.7753
42	945	CHEN Xiaoyuan, LUO Yuanpei	2001	Acta Agronomica Sinica	116.294	40.0363	Triticum aestivum L.	Monocotyledon	Graminae	Herbaceous	The flowering period	Mid period	Plant height	0.35	Heavy stress	10d	Short-term coercion	3	3	44.7148	7.74484	68.9848	11.9485
42	946	CHEN Xiaoyuan, LUO Yuanpei	2001	Acta Agronomica Sinica	116.294	40.0363	Triticum aestivum L.	Monocotyledon	Graminae	Herbaceous	The flowering period	Mid period	Leaf area	0.55	Medium stress	10d	Short-term coercion	3	3	410.558	71.1107	380.08	65.8317
42	947	CHEN Xiaoyuan, LUO Yuanpei	2001	Acta Agronomica Sinica	116.294	40.0363	Triticum aestivum L.	Monocotyledon	Graminae	Herbaceous	The flowering period	Mid period	Leaf area	0.35	Heavy stress	10d	Short-term coercion	3	3	96.8127	16.7685	380.08	65.8317
42	948	CHEN Xiaoyuan, LUO Yuanpei	2001	Acta Agronomica Sinica	116.294	40.0363	Triticum aestivum L.	Monocotyledon	Graminae	Herbaceous	The flowering period	Mid period	Yield	0.55	Medium stress	10d	Short-term coercion	3	3	5520.28	956.141	6520.33	1129.35
42	949	CHEN Xiaoyuan, LUO Yuanpei	2001	Acta Agronomica Sinica	116.294	40.0363	Triticum aestivum L.	Monocotyledon	Graminae	Herbaceous	The flowering period	Mid period	Yield	0.35	Heavy stress	10d	Short-term coercion	3	3	2926.15	506.824	6520.33	1129.35
42	950	CHEN Xiaoyuan, LUO Yuanpei	2001	Acta Agronomica Sinica	116.294	40.0363	Triticum aestivum L.	Monocotyledon	Graminae	Herbaceous	The flowering period	Mid period	Dry matter	0.55	Medium stress	10d	Short-term coercion	3	3	4.7332	0.819814	6.5723	1.13836
42	951	CHEN Xiaoyuan, LUO Yuanpei	2001	Acta Agronomica Sinica	116.294	40.0363	Triticum aestivum L.	Monocotyledon	Graminae	Herbaceous	The flowering period	Mid period	Dry matter	0.35	Heavy stress	10d	Short-term coercion	3	3	1.71079	0.296318	6.5723	1.13836
42	952	CHEN Xiaoyuan, LUO Yuanpei	2001	Acta Agronomica Sinica	116.294	40.0363	Triticum aestivum L.	Monocotyledon	Graminae	Herbaceous	The flowering period	Mid period	WUE	0.55	Medium stress	10d	Short-term coercion	3	3	128	22.1703	103	17.8401
42	953	CHEN Xiaoyuan, LUO Yuanpei	2001	Acta Agronomica Sinica	116.294	40.0363	Triticum aestivum L.	Monocotyledon	Graminae	Herbaceous	The flowering period	Mid period	WUE	0.35	Heavy stress	10d	Short-term coercion	3	3	109	18.8794	103	17.8401
43	954	YAN Tao, ZHU Guoliang, GE Feifan, JIANG Yuelin, LI Wei, WU Wenge	2019	Meteorology and Disaster Reduction Research	117.263	31.8683	Triticum aestivum L.	Monocotyledon	Graminae	Herbaceous	Rejuvenation stage	Preceding period	Pn	0.55	Medium stress	10d	Short-term coercion	3	3	16.42	3.65463	15.01	1.90526
43	955	YAN Tao, ZHU Guoliang, GE Feifan, JIANG Yuelin, LI Wei, WU Wenge	2019	Meteorology and Disaster Reduction Research	117.263	31.8683	Triticum aestivum L.	Monocotyledon	Graminae	Herbaceous	The flowering period	Mid period	Pn	0.55	Medium stress	10d	Short-term coercion	3	3	12.51	3.32554	15.01	1.90526
43	956	YAN Tao, ZHU Guoliang, GE Feifan, JIANG Yuelin, LI Wei, WU Wenge	2019	Meteorology and Disaster Reduction Research	117.263	31.8683	Triticum aestivum L.	Monocotyledon	Graminae	Herbaceous	Rejuvenation stage	Preceding period	Gs	0.55	Medium stress	10d	Short-term coercion	3	3	0.7825	0.268468	0.805	0.458993
43	957	YAN Tao, ZHU Guoliang, GE Feifan, JIANG Yuelin, LI Wei, WU Wenge	2019	Meteorology and Disaster Reduction Research	117.263	31.8683	Triticum aestivum L.	Monocotyledon	Graminae	Herbaceous	The flowering period	Mid period	Gs	0.55	Medium stress	10d	Short-term coercion	3	3	0.07	0.0952628	0.805	0.458993
43	958	YAN Tao, ZHU Guoliang, GE Feifan, JIANG Yuelin, LI Wei, WU Wenge	2019	Meteorology and Disaster Reduction Research	117.263	31.8683	Triticum aestivum L.	Monocotyledon	Graminae	Herbaceous	Rejuvenation stage	Preceding period	Ci	0.55	Medium stress	10d	Short-term coercion	3	3	263.175	13.4673	265.767	96.516
43	959	YAN Tao, ZHU Guoliang, GE Feifan, JIANG Yuelin, LI Wei, WU Wenge	2019	Meteorology and Disaster Reduction Research	117.263	31.8683	Triticum aestivum L.	Monocotyledon	Graminae	Herbaceous	The flowering period	Mid period	Ci	0.55	Medium stress	10d	Short-term coercion	3	3	256.048	69.5813	265.767	96.516
43	960	YAN Tao, ZHU Guoliang, GE Feifan, JIANG Yuelin, LI Wei, WU Wenge	2019	Meteorology and Disaster Reduction Research	117.263	31.8683	Triticum aestivum L.	Monocotyledon	Graminae	Herbaceous	Rejuvenation stage	Preceding period	Tr	0.55	Medium stress	10d	Short-term coercion	3	3	3.31159	0.175715	2.32609	0.22592
43	961	YAN Tao, ZHU Guoliang, GE Feifan, JIANG Yuelin, LI Wei, WU Wenge	2019	Meteorology and Disaster Reduction Research	117.263	31.8683	Triticum aestivum L.	Monocotyledon	Graminae	Herbaceous	The flowering period	Mid period	Tr	0.55	Medium stress	10d	Short-term coercion	3	3	2.18841	1.00409	2.32609	0.22592
43	962	YAN Tao, ZHU Guoliang, GE Feifan, JIANG Yuelin, LI Wei, WU Wenge	2019	Meteorology and Disaster Reduction Research	117.263	31.8683	Triticum aestivum L.	Monocotyledon	Graminae	Herbaceous	Rejuvenation stage	Preceding period	WUE	0.55	Medium stress	10d	Short-term coercion	3	3	4.95413	1.7543	6.42936	0.915286
43	963	YAN Tao, ZHU Guoliang, GE Feifan, JIANG Yuelin, LI Wei, WU Wenge	2019	Meteorology and Disaster Reduction Research	117.263	31.8683	Triticum aestivum L.	Monocotyledon	Graminae	Herbaceous	The flowering period	Mid period	WUE	0.55	Medium stress	10d	Short-term coercion	3	3	5.6367	3.27977	6.42936	0.915286
43	964	YAN Tao, ZHU Guoliang, GE Feifan, JIANG Yuelin, LI Wei, WU Wenge	2019	Meteorology and Disaster Reduction Research	117.263	31.8683	Triticum aestivum L.	Monocotyledon	Graminae	Herbaceous	Rejuvenation stage	Preceding period	Pmax	0.55	Medium stress	10d	Short-term coercion	3	3	16.244	2.81354	21.066	3.64874
43	965	YAN Tao, ZHU Guoliang, GE Feifan, JIANG Yuelin, LI Wei, WU Wenge	2019	Meteorology and Disaster Reduction Research	117.263	31.8683	Triticum aestivum L.	Monocotyledon	Graminae	Herbaceous	The flowering period	Mid period	Pmax	0.55	Medium stress	10d	Short-term coercion	3	3	16.985	2.94189	21.066	3.64874
43	966	YAN Tao, ZHU Guoliang, GE Feifan, JIANG Yuelin, LI Wei, WU Wenge	2019	Meteorology and Disaster Reduction Research	117.263	31.8683	Triticum aestivum L.	Monocotyledon	Graminae	Herbaceous	Rejuvenation stage	Preceding period	Optical compensation point	0.55	Medium stress	10d	Short-term coercion	3	3	26.762	4.63531	32.46	5.62224
43	967	YAN Tao, ZHU Guoliang, GE Feifan, JIANG Yuelin, LI Wei, WU Wenge	2019	Meteorology and Disaster Reduction Research	117.263	31.8683	Triticum aestivum L.	Monocotyledon	Graminae	Herbaceous	The flowering period	Mid period	Optical compensation point	0.55	Medium stress	10d	Short-term coercion	3	3	56.384	9.766	32.46	5.62224
43	968	YAN Tao, ZHU Guoliang, GE Feifan, JIANG Yuelin, LI Wei, WU Wenge	2019	Meteorology and Disaster Reduction Research	117.263	31.8683	Triticum aestivum L.	Monocotyledon	Graminae	Herbaceous	Rejuvenation stage	Preceding period	Light saturation point	0.55	Medium stress	10d	Short-term coercion	3	3	450.888	78.0961	385.916	66.8426
43	969	YAN Tao, ZHU Guoliang, GE Feifan, JIANG Yuelin, LI Wei, WU Wenge	2019	Meteorology and Disaster Reduction Research	117.263	31.8683	Triticum aestivum L.	Monocotyledon	Graminae	Herbaceous	The flowering period	Mid period	Light saturation point	0.55	Medium stress	10d	Short-term coercion	3	3	433.829	75.1414	385.916	66.8426
43	970	YAN Tao, ZHU Guoliang, GE Feifan, JIANG Yuelin, LI Wei, WU Wenge	2019	Meteorology and Disaster Reduction Research	117.263	31.8683	Triticum aestivum L.	Monocotyledon	Graminae	Herbaceous	Rejuvenation stage	Preceding period	Dry matter	0.55	Medium stress	10d	Short-term coercion	3	3	148.38	25.7002	174.22	30.1758
43	971	YAN Tao, ZHU Guoliang, GE Feifan, JIANG Yuelin, LI Wei, WU Wenge	2019	Meteorology and Disaster Reduction Research	117.263	31.8683	Triticum aestivum L.	Monocotyledon	Graminae	Herbaceous	The flowering period	Mid period	Dry matter	0.55	Medium stress	10d	Short-term coercion	3	3	135.33	23.4398	174.22	30.1758
43	972	YAN Tao, ZHU Guoliang, GE Feifan, JIANG Yuelin, LI Wei, WU Wenge	2019	Meteorology and Disaster Reduction Research	117.263	31.8683	Triticum aestivum L.	Monocotyledon	Graminae	Herbaceous	Rejuvenation stage	Preceding period	Yield	0.55	Medium stress	10d	Short-term coercion	3	3	68.12	11.7987	77.18	13.368
43	973	YAN Tao, ZHU Guoliang, GE Feifan, JIANG Yuelin, LI Wei, WU Wenge	2019	Meteorology and Disaster Reduction Research	117.263	31.8683	Triticum aestivum L.	Monocotyledon	Graminae	Herbaceous	The flowering period	Mid period	Yield	0.55	Medium stress	10d	Short-term coercion	3	3	55.08	9.54014	77.18	13.368
44	974	LIU Liping, OUYANG Zhu, WU Lanfang, LI Fadong, LIU Pengfei	2012	Chinese Journal of Ecology	121.211	36.7676	Triticum aestivum L.	Monocotyledon	Graminae	Herbaceous	Rejuvenation stage	Preceding period	chlorophyll content	0.55	Medium stress	10d	Short-term coercion	3	3	4.54	0.786351	4.5	0.779423
44	975	LIU Liping, OUYANG Zhu, WU Lanfang, LI Fadong, LIU Pengfei	2012	Chinese Journal of Ecology	121.211	36.7676	Triticum aestivum L.	Monocotyledon	Graminae	Herbaceous	The flowering period	Mid period	chlorophyll content	0.55	Medium stress	10d	Short-term coercion	3	3	4.13	0.715337	4.5	0.779423
44	976	LIU Liping, OUYANG Zhu, WU Lanfang, LI Fadong, LIU Pengfei	2012	Chinese Journal of Ecology	121.211	36.7676	Triticum aestivum L.	Monocotyledon	Graminae	Herbaceous	Rejuvenation stage	Preceding period	Pn	0.55	Medium stress	10d	Short-term coercion	3	3	16.76	2.90292	16.85	2.91851
44	977	LIU Liping, OUYANG Zhu, WU Lanfang, LI Fadong, LIU Pengfei	2012	Chinese Journal of Ecology	121.211	36.7676	Triticum aestivum L.	Monocotyledon	Graminae	Herbaceous	The flowering period	Mid period	Pn	0.55	Medium stress	10d	Short-term coercion	3	3	10.03	1.73725	16.85	2.91851
44	978	LIU Liping, OUYANG Zhu, WU Lanfang, LI Fadong, LIU Pengfei	2012	Chinese Journal of Ecology	121.211	36.7676	Triticum aestivum L.	Monocotyledon	Graminae	Herbaceous	Rejuvenation stage	Preceding period	Tr	0.55	Medium stress	10d	Short-term coercion	3	3	5.69	0.985537	5.03	0.871222
44	979	LIU Liping, OUYANG Zhu, WU Lanfang, LI Fadong, LIU Pengfei	2012	Chinese Journal of Ecology	121.211	36.7676	Triticum aestivum L.	Monocotyledon	Graminae	Herbaceous	The flowering period	Mid period	Tr	0.55	Medium stress	10d	Short-term coercion	3	3	2.59	0.448601	5.03	0.871222
44	980	LIU Liping, OUYANG Zhu, WU Lanfang, LI Fadong, LIU Pengfei	2012	Chinese Journal of Ecology	121.211	36.7676	Triticum aestivum L.	Monocotyledon	Graminae	Herbaceous	Rejuvenation stage	Preceding period	Gs	0.55	Medium stress	10d	Short-term coercion	3	3	0.53	0.0917987	0.47	0.0814064
44	981	LIU Liping, OUYANG Zhu, WU Lanfang, LI Fadong, LIU Pengfei	2012	Chinese Journal of Ecology	121.211	36.7676	Triticum aestivum L.	Monocotyledon	Graminae	Herbaceous	The flowering period	Mid period	Gs	0.55	Medium stress	10d	Short-term coercion	3	3	0.14	0.0242487	0.47	0.0814064
44	982	LIU Liping, OUYANG Zhu, WU Lanfang, LI Fadong, LIU Pengfei	2012	Chinese Journal of Ecology	121.211	36.7676	Triticum aestivum L.	Monocotyledon	Graminae	Herbaceous	Rejuvenation stage	Preceding period	Ci	0.55	Medium stress	10d	Short-term coercion	3	3	308.75	53.4771	299.21	51.8247
44	983	LIU Liping, OUYANG Zhu, WU Lanfang, LI Fadong, LIU Pengfei	2012	Chinese Journal of Ecology	121.211	36.7676	Triticum aestivum L.	Monocotyledon	Graminae	Herbaceous	The flowering period	Mid period	Ci	0.55	Medium stress	10d	Short-term coercion	3	3	241.68	41.8602	299.21	51.8247
44	984	LIU Liping, OUYANG Zhu, WU Lanfang, LI Fadong, LIU Pengfei	2012	Chinese Journal of Ecology	121.211	36.7676	Triticum aestivum L.	Monocotyledon	Graminae	Herbaceous	Rejuvenation stage	Preceding period	Yield	0.55	Medium stress	10d	Short-term coercion	3	3	7042.9	1219.87	7723.1	1337.68
44	985	LIU Liping, OUYANG Zhu, WU Lanfang, LI Fadong, LIU Pengfei	2012	Chinese Journal of Ecology	121.211	36.7676	Triticum aestivum L.	Monocotyledon	Graminae	Herbaceous	The flowering period	Mid period	Yield	0.55	Medium stress	10d	Short-term coercion	3	3	6182.2	1070.79	7723.1	1337.68
45	986	LI Yanbing, ZHU Yanan, LI Daoxi, GAO Yang	2018	Journal of Irrigation and Drainage	113.808	35.1593	Triticum aestivum L.	Monocotyledon	Graminae	Herbaceous	Jointing stage	Preceding period	Yield	0.6	Medium stress	10d	Short-term coercion	3	3	1.59	0.275396	1.64	0.284056
45	987	LI Yanbing, ZHU Yanan, LI Daoxi, GAO Yang	2018	Journal of Irrigation and Drainage	113.808	35.1593	Triticum aestivum L.	Monocotyledon	Graminae	Herbaceous	Jointing stage	Preceding period	Yield	0.5	Medium stress	10d	Short-term coercion	3	3	1.54	0.266736	1.64	0.284056
45	988	LI Yanbing, ZHU Yanan, LI Daoxi, GAO Yang	2018	Journal of Irrigation and Drainage	113.808	35.1593	Triticum aestivum L.	Monocotyledon	Graminae	Herbaceous	Jointing stage	Preceding period	Yield	0.4	Heavy stress	10d	Short-term coercion	3	3	1.33	0.230363	1.64	0.284056
45	989	LI Yanbing, ZHU Yanan, LI Daoxi, GAO Yang	2018	Journal of Irrigation and Drainage	113.808	35.1593	Triticum aestivum L.	Monocotyledon	Graminae	Herbaceous	Tasseling stage	Mid period	Yield	0.6	Medium stress	10d	Short-term coercion	3	3	1.56	0.2702	1.64	0.284056
45	990	LI Yanbing, ZHU Yanan, LI Daoxi, GAO Yang	2018	Journal of Irrigation and Drainage	113.808	35.1593	Triticum aestivum L.	Monocotyledon	Graminae	Herbaceous	Tasseling stage	Mid period	Yield	0.5	Medium stress	10d	Short-term coercion	3	3	1.52	0.263272	1.64	0.284056
45	991	LI Yanbing, ZHU Yanan, LI Daoxi, GAO Yang	2018	Journal of Irrigation and Drainage	113.808	35.1593	Triticum aestivum L.	Monocotyledon	Graminae	Herbaceous	Tasseling stage	Mid period	Yield	0.4	Heavy stress	10d	Short-term coercion	3	3	1.28	0.221703	1.64	0.284056
45	992	LI Yanbing, ZHU Yanan, LI Daoxi, GAO Yang	2018	Journal of Irrigation and Drainage	113.808	35.1593	Triticum aestivum L.	Monocotyledon	Graminae	Herbaceous	Jointing stage	Preceding period	Plant height	0.6	Medium stress	10d	Short-term coercion	3	3	51.2524	9.81162	54.3545	7.94274
45	993	LI Yanbing, ZHU Yanan, LI Daoxi, GAO Yang	2018	Journal of Irrigation and Drainage	113.808	35.1593	Triticum aestivum L.	Monocotyledon	Graminae	Herbaceous	Jointing stage	Preceding period	Plant height	0.5	Medium stress	10d	Short-term coercion	3	3	44.2389	7.47552	54.3545	7.94274
45	994	LI Yanbing, ZHU Yanan, LI Daoxi, GAO Yang	2018	Journal of Irrigation and Drainage	113.808	35.1593	Triticum aestivum L.	Monocotyledon	Graminae	Herbaceous	Jointing stage	Preceding period	Plant height	0.4	Heavy stress	10d	Short-term coercion	3	3	38.3044	7.47552	54.3545	7.94274
45	995	LI Yanbing, ZHU Yanan, LI Daoxi, GAO Yang	2018	Journal of Irrigation and Drainage	113.808	35.1593	Triticum aestivum L.	Monocotyledon	Graminae	Herbaceous	Tasseling stage	Mid period	Plant height	0.6	Medium stress	10d	Short-term coercion	3	3	58.4008	10.7461	59.3449	9.81162
45	996	LI Yanbing, ZHU Yanan, LI Daoxi, GAO Yang	2018	Journal of Irrigation and Drainage	113.808	35.1593	Triticum aestivum L.	Monocotyledon	Graminae	Herbaceous	Tasseling stage	Mid period	Plant height	0.5	Medium stress	10d	Short-term coercion	3	3	52.6012	9.3444	59.3449	9.81162
45	997	LI Yanbing, ZHU Yanan, LI Daoxi, GAO Yang	2018	Journal of Irrigation and Drainage	113.808	35.1593	Triticum aestivum L.	Monocotyledon	Graminae	Herbaceous	Tasseling stage	Mid period	Plant height	0.4	Heavy stress	10d	Short-term coercion	3	3	50.0385	7.0083	59.3449	9.81162
45	998	LI Yanbing, ZHU Yanan, LI Daoxi, GAO Yang	2018	Journal of Irrigation and Drainage	113.808	35.1593	Triticum aestivum L.	Monocotyledon	Graminae	Herbaceous	Jointing stage	Preceding period	Leaf area	0.6	Medium stress	10d	Short-term coercion	3	3	119.596	18.1953	123.232	22.3942
45	999	LI Yanbing, ZHU Yanan, LI Daoxi, GAO Yang	2018	Journal of Irrigation and Drainage	113.808	35.1593	Triticum aestivum L.	Monocotyledon	Graminae	Herbaceous	Jointing stage	Preceding period	Leaf area	0.5	Medium stress	10d	Short-term coercion	3	3	100.606	16.7956	123.232	22.3942
45	1000	LI Yanbing, ZHU Yanan, LI Daoxi, GAO Yang	2018	Journal of Irrigation and Drainage	113.808	35.1593	Triticum aestivum L.	Monocotyledon	Graminae	Herbaceous	Jointing stage	Preceding period	Leaf area	0.4	Heavy stress	10d	Short-term coercion	3	3	58.9899	9.79746	123.232	22.3942
45	1001	LI Yanbing, ZHU Yanan, LI Daoxi, GAO Yang	2018	Journal of Irrigation and Drainage	113.808	35.1593	Triticum aestivum L.	Monocotyledon	Graminae	Herbaceous	Tasseling stage	Mid period	Leaf area	0.6	Medium stress	10d	Short-term coercion	3	3	140.202	23.7938	143.03	25.1935
45	1002	LI Yanbing, ZHU Yanan, LI Daoxi, GAO Yang	2018	Journal of Irrigation and Drainage	113.808	35.1593	Triticum aestivum L.	Monocotyledon	Graminae	Herbaceous	Tasseling stage	Mid period	Leaf area	0.5	Medium stress	10d	Short-term coercion	3	3	128.485	22.3942	143.03	25.1935
45	1003	LI Yanbing, ZHU Yanan, LI Daoxi, GAO Yang	2018	Journal of Irrigation and Drainage	113.808	35.1593	Triticum aestivum L.	Monocotyledon	Graminae	Herbaceous	Tasseling stage	Mid period	Leaf area	0.4	Heavy stress	10d	Short-term coercion	3	3	100.202	15.396	143.03	25.1935
45	1004	LI Yanbing, ZHU Yanan, LI Daoxi, GAO Yang	2018	Journal of Irrigation and Drainage	113.808	35.1593	Triticum aestivum L.	Monocotyledon	Graminae	Herbaceous	Jointing stage	Preceding period	Gs	0.6	Medium stress	10d	Short-term coercion	3	3	168.478	23.9612	182.312	32.5187
45	1005	LI Yanbing, ZHU Yanan, LI Daoxi, GAO Yang	2018	Journal of Irrigation and Drainage	113.808	35.1593	Triticum aestivum L.	Monocotyledon	Graminae	Herbaceous	Jointing stage	Preceding period	Gs	0.5	Medium stress	10d	Short-term coercion	3	3	140.81	22.2497	182.312	32.5187
45	1006	LI Yanbing, ZHU Yanan, LI Daoxi, GAO Yang	2018	Journal of Irrigation and Drainage	113.808	35.1593	Triticum aestivum L.	Monocotyledon	Graminae	Herbaceous	Jointing stage	Preceding period	Gs	0.4	Heavy stress	10d	Short-term coercion	3	3	100.791	15.4036	182.312	32.5187
45	1007	LI Yanbing, ZHU Yanan, LI Daoxi, GAO Yang	2018	Journal of Irrigation and Drainage	113.808	35.1593	Triticum aestivum L.	Monocotyledon	Graminae	Herbaceous	Tasseling stage	Mid period	Gs	0.6	Medium stress	10d	Short-term coercion	3	3	162.549	30.8072	185.771	32.5187
45	1008	LI Yanbing, ZHU Yanan, LI Daoxi, GAO Yang	2018	Journal of Irrigation and Drainage	113.808	35.1593	Triticum aestivum L.	Monocotyledon	Graminae	Herbaceous	Tasseling stage	Mid period	Gs	0.5	Medium stress	10d	Short-term coercion	3	3	145.751	25.6727	185.771	32.5187
45	1009	LI Yanbing, ZHU Yanan, LI Daoxi, GAO Yang	2018	Journal of Irrigation and Drainage	113.808	35.1593	Triticum aestivum L.	Monocotyledon	Graminae	Herbaceous	Tasseling stage	Mid period	Gs	0.4	Heavy stress	10d	Short-term coercion	3	3	94.8617	23.9612	185.771	32.5187
45	1010	LI Yanbing, ZHU Yanan, LI Daoxi, GAO Yang	2018	Journal of Irrigation and Drainage	113.808	35.1593	Triticum aestivum L.	Monocotyledon	Graminae	Herbaceous	Jointing stage	Preceding period	Pn	0.6	Medium stress	10d	Short-term coercion	3	3	15.3509	2.73482	17.0614	2.88675
45	1011	LI Yanbing, ZHU Yanan, LI Daoxi, GAO Yang	2018	Journal of Irrigation and Drainage	113.808	35.1593	Triticum aestivum L.	Monocotyledon	Graminae	Herbaceous	Jointing stage	Preceding period	Pn	0.5	Medium stress	10d	Short-term coercion	3	3	14.693	2.43095	17.0614	2.88675
45	1012	LI Yanbing, ZHU Yanan, LI Daoxi, GAO Yang	2018	Journal of Irrigation and Drainage	113.808	35.1593	Triticum aestivum L.	Monocotyledon	Graminae	Herbaceous	Jointing stage	Preceding period	Pn	0.4	Heavy stress	10d	Short-term coercion	3	3	14.1667	1.82321	17.0614	2.88675
45	1013	LI Yanbing, ZHU Yanan, LI Daoxi, GAO Yang	2018	Journal of Irrigation and Drainage	113.808	35.1593	Triticum aestivum L.	Monocotyledon	Graminae	Herbaceous	Tasseling stage	Mid period	Pn	0.6	Medium stress	10d	Short-term coercion	3	3	16.886	2.43095	18.0702	3.03869
45	1014	LI Yanbing, ZHU Yanan, LI Daoxi, GAO Yang	2018	Journal of Irrigation and Drainage	113.808	35.1593	Triticum aestivum L.	Monocotyledon	Graminae	Herbaceous	Tasseling stage	Mid period	Pn	0.5	Medium stress	10d	Short-term coercion	3	3	14.8246	3.03869	18.0702	3.03869
45	1015	LI Yanbing, ZHU Yanan, LI Daoxi, GAO Yang	2018	Journal of Irrigation and Drainage	113.808	35.1593	Triticum aestivum L.	Monocotyledon	Graminae	Herbaceous	Tasseling stage	Mid period	Pn	0.4	Heavy stress	10d	Short-term coercion	3	3	13.3333	2.43095	18.0702	3.03869
46	1016	LIU Ling, HAO Weiping, BAI Qingjun, MEI Xurong, YAN Yongliu	2011	Journal of Irrigation and Drainage	116.332	39.9668	Triticum aestivum L.	Monocotyledon	Graminae	Herbaceous	Jointing stage	Preceding period	Yield	0.6	Medium stress	5d	Short-term coercion	3	3	68.051	11.7868	72.87	12.6215
46	1017	LIU Ling, HAO Weiping, BAI Qingjun, MEI Xurong, YAN Yongliu	2011	Journal of Irrigation and Drainage	116.332	39.9668	Triticum aestivum L.	Monocotyledon	Graminae	Herbaceous	Jointing stage	Preceding period	Yield	0.4	Heavy stress	5d	Short-term coercion	3	3	42.93	7.43569	72.87	12.6215
46	1018	LIU Ling, HAO Weiping, BAI Qingjun, MEI Xurong, YAN Yongliu	2011	Journal of Irrigation and Drainage	116.332	39.9668	Triticum aestivum L.	Monocotyledon	Graminae	Herbaceous	Jointing stage	Preceding period	Yield	0.6	Medium stress	5d	Short-term coercion	3	3	55.15	9.55226	71.87	12.4482
46	1019	LIU Ling, HAO Weiping, BAI Qingjun, MEI Xurong, YAN Yongliu	2011	Journal of Irrigation and Drainage	116.332	39.9668	Triticum aestivum L.	Monocotyledon	Graminae	Herbaceous	Jointing stage	Preceding period	Yield	0.4	Heavy stress	5d	Short-term coercion	3	3	38.95	6.74634	71.87	12.4482
46	1020	LIU Ling, HAO Weiping, BAI Qingjun, MEI Xurong, YAN Yongliu	2011	Journal of Irrigation and Drainage	116.332	39.9668	Triticum aestivum L.	Monocotyledon	Graminae	Herbaceous	Jointing stage	Preceding period	Yield	0.6	Medium stress	10d	Short-term coercion	3	3	65.733	11.3853	72.87	12.6215
46	1021	LIU Ling, HAO Weiping, BAI Qingjun, MEI Xurong, YAN Yongliu	2011	Journal of Irrigation and Drainage	116.332	39.9668	Triticum aestivum L.	Monocotyledon	Graminae	Herbaceous	Jointing stage	Preceding period	Yield	0.4	Heavy stress	10d	Short-term coercion	3	3	36.688	6.35455	72.87	12.6215
46	1022	LIU Ling, HAO Weiping, BAI Qingjun, MEI Xurong, YAN Yongliu	2011	Journal of Irrigation and Drainage	116.332	39.9668	Triticum aestivum L.	Monocotyledon	Graminae	Herbaceous	Jointing stage	Preceding period	Yield	0.6	Medium stress	10d	Short-term coercion	3	3	49.675	8.60396	71.87	12.4482
46	1023	LIU Ling, HAO Weiping, BAI Qingjun, MEI Xurong, YAN Yongliu	2011	Journal of Irrigation and Drainage	116.332	39.9668	Triticum aestivum L.	Monocotyledon	Graminae	Herbaceous	Jointing stage	Preceding period	Yield	0.4	Heavy stress	10d	Short-term coercion	3	3	31.425	5.44297	71.87	12.4482
46	1024	LIU Ling, HAO Weiping, BAI Qingjun, MEI Xurong, YAN Yongliu	2011	Journal of Irrigation and Drainage	116.332	39.9668	Triticum aestivum L.	Monocotyledon	Graminae	Herbaceous	Jointing stage	Preceding period	WUE	0.6	Medium stress	5d	Short-term coercion	3	3	1.647	0.285269	1.557	0.26968
46	1025	LIU Ling, HAO Weiping, BAI Qingjun, MEI Xurong, YAN Yongliu	2011	Journal of Irrigation and Drainage	116.332	39.9668	Triticum aestivum L.	Monocotyledon	Graminae	Herbaceous	Jointing stage	Preceding period	WUE	0.4	Heavy stress	5d	Short-term coercion	3	3	1.27	0.21997	1.557	0.26968
46	1026	LIU Ling, HAO Weiping, BAI Qingjun, MEI Xurong, YAN Yongliu	2011	Journal of Irrigation and Drainage	116.332	39.9668	Triticum aestivum L.	Monocotyledon	Graminae	Herbaceous	Jointing stage	Preceding period	WUE	0.6	Medium stress	5d	Short-term coercion	3	3	1.654	0.286481	1.447	0.250628
46	1027	LIU Ling, HAO Weiping, BAI Qingjun, MEI Xurong, YAN Yongliu	2011	Journal of Irrigation and Drainage	116.332	39.9668	Triticum aestivum L.	Monocotyledon	Graminae	Herbaceous	Jointing stage	Preceding period	WUE	0.4	Heavy stress	5d	Short-term coercion	3	3	1.154	0.199879	1.447	0.250628
46	1028	LIU Ling, HAO Weiping, BAI Qingjun, MEI Xurong, YAN Yongliu	2011	Journal of Irrigation and Drainage	116.332	39.9668	Triticum aestivum L.	Monocotyledon	Graminae	Herbaceous	Jointing stage	Preceding period	WUE	0.6	Medium stress	10d	Short-term coercion	3	3	1.158	0.200571	1.557	0.26968
46	1029	LIU Ling, HAO Weiping, BAI Qingjun, MEI Xurong, YAN Yongliu	2011	Journal of Irrigation and Drainage	116.332	39.9668	Triticum aestivum L.	Monocotyledon	Graminae	Herbaceous	Jointing stage	Preceding period	WUE	0.4	Heavy stress	10d	Short-term coercion	3	3	0.969	0.167836	1.557	0.26968
46	1030	LIU Ling, HAO Weiping, BAI Qingjun, MEI Xurong, YAN Yongliu	2011	Journal of Irrigation and Drainage	116.332	39.9668	Triticum aestivum L.	Monocotyledon	Graminae	Herbaceous	Jointing stage	Preceding period	WUE	0.6	Medium stress	10d	Short-term coercion	3	3	1.074	0.186022	1.447	0.250628
46	1031	LIU Ling, HAO Weiping, BAI Qingjun, MEI Xurong, YAN Yongliu	2011	Journal of Irrigation and Drainage	116.332	39.9668	Triticum aestivum L.	Monocotyledon	Graminae	Herbaceous	Jointing stage	Preceding period	WUE	0.4	Heavy stress	10d	Short-term coercion	3	3	0.822	0.142375	1.447	0.250628
46	1032	LIU Ling, HAO Weiping, BAI Qingjun, MEI Xurong, YAN Yongliu	2011	Journal of Irrigation and Drainage	116.332	39.9668	Triticum aestivum L.	Monocotyledon	Graminae	Herbaceous	Jointing stage	Preceding period	Pn	0.6	Medium stress	5d	Short-term coercion	3	3	22.6991	3.9316	20.9292	3.62504
46	1033	LIU Ling, HAO Weiping, BAI Qingjun, MEI Xurong, YAN Yongliu	2011	Journal of Irrigation and Drainage	116.332	39.9668	Triticum aestivum L.	Monocotyledon	Graminae	Herbaceous	Jointing stage	Preceding period	Pn	0.4	Heavy stress	5d	Short-term coercion	3	3	19.5133	3.3798	20.9292	3.62504
46	1034	LIU Ling, HAO Weiping, BAI Qingjun, MEI Xurong, YAN Yongliu	2011	Journal of Irrigation and Drainage	116.332	39.9668	Triticum aestivum L.	Monocotyledon	Graminae	Herbaceous	Jointing stage	Preceding period	Pn	0.6	Medium stress	5d	Short-term coercion	3	3	19.9828	3.46112	22.069	3.82246
46	1035	LIU Ling, HAO Weiping, BAI Qingjun, MEI Xurong, YAN Yongliu	2011	Journal of Irrigation and Drainage	116.332	39.9668	Triticum aestivum L.	Monocotyledon	Graminae	Herbaceous	Jointing stage	Preceding period	Pn	0.4	Heavy stress	5d	Short-term coercion	3	3	19.0345	3.29687	22.069	3.82246
46	1036	LIU Ling, HAO Weiping, BAI Qingjun, MEI Xurong, YAN Yongliu	2011	Journal of Irrigation and Drainage	116.332	39.9668	Triticum aestivum L.	Monocotyledon	Graminae	Herbaceous	Jointing stage	Preceding period	Pn	0.6	Medium stress	10d	Short-term coercion	3	3	19.6781	3.40835	20.794	3.60162
46	1037	LIU Ling, HAO Weiping, BAI Qingjun, MEI Xurong, YAN Yongliu	2011	Journal of Irrigation and Drainage	116.332	39.9668	Triticum aestivum L.	Monocotyledon	Graminae	Herbaceous	Jointing stage	Preceding period	Pn	0.4	Heavy stress	10d	Short-term coercion	3	3	17.4464	3.0218	20.794	3.60162
46	1038	LIU Ling, HAO Weiping, BAI Qingjun, MEI Xurong, YAN Yongliu	2011	Journal of Irrigation and Drainage	116.332	39.9668	Triticum aestivum L.	Monocotyledon	Graminae	Herbaceous	Jointing stage	Preceding period	Pn	0.6	Medium stress	10d	Short-term coercion	3	3	17.7417	3.07295	22.325	3.8668
46	1039	LIU Ling, HAO Weiping, BAI Qingjun, MEI Xurong, YAN Yongliu	2011	Journal of Irrigation and Drainage	116.332	39.9668	Triticum aestivum L.	Monocotyledon	Graminae	Herbaceous	Jointing stage	Preceding period	Pn	0.4	Heavy stress	10d	Short-term coercion	3	3	14.1667	2.45374	22.325	3.8668
46	1040	LIU Ling, HAO Weiping, BAI Qingjun, MEI Xurong, YAN Yongliu	2011	Journal of Irrigation and Drainage	116.332	39.9668	Triticum aestivum L.	Monocotyledon	Graminae	Herbaceous	Jointing stage	Preceding period	Tr	0.6	Medium stress	5d	Short-term coercion	3	3	5.83575	1.01078	6.30918	1.09278
46	1041	LIU Ling, HAO Weiping, BAI Qingjun, MEI Xurong, YAN Yongliu	2011	Journal of Irrigation and Drainage	116.332	39.9668	Triticum aestivum L.	Monocotyledon	Graminae	Herbaceous	Jointing stage	Preceding period	Tr	0.4	Heavy stress	5d	Short-term coercion	3	3	5.56522	0.963924	6.30918	1.09278
46	1042	LIU Ling, HAO Weiping, BAI Qingjun, MEI Xurong, YAN Yongliu	2011	Journal of Irrigation and Drainage	116.332	39.9668	Triticum aestivum L.	Monocotyledon	Graminae	Herbaceous	Jointing stage	Preceding period	Tr	0.6	Medium stress	5d	Short-term coercion	3	3	4.74129	0.821216	6.69154	1.15901
46	1043	LIU Ling, HAO Weiping, BAI Qingjun, MEI Xurong, YAN Yongliu	2011	Journal of Irrigation and Drainage	116.332	39.9668	Triticum aestivum L.	Monocotyledon	Graminae	Herbaceous	Jointing stage	Preceding period	Tr	0.4	Heavy stress	5d	Short-term coercion	3	3	5.1791	0.897047	6.69154	1.15901
46	1044	LIU Ling, HAO Weiping, BAI Qingjun, MEI Xurong, YAN Yongliu	2011	Journal of Irrigation and Drainage	116.332	39.9668	Triticum aestivum L.	Monocotyledon	Graminae	Herbaceous	Jointing stage	Preceding period	Tr	0.6	Medium stress	10d	Short-term coercion	3	3	6.46875	1.12042	6.25	1.08253
46	1045	LIU Ling, HAO Weiping, BAI Qingjun, MEI Xurong, YAN Yongliu	2011	Journal of Irrigation and Drainage	116.332	39.9668	Triticum aestivum L.	Monocotyledon	Graminae	Herbaceous	Jointing stage	Preceding period	Tr	0.4	Heavy stress	10d	Short-term coercion	3	3	4.625	0.801073	6.25	1.08253
46	1046	LIU Ling, HAO Weiping, BAI Qingjun, MEI Xurong, YAN Yongliu	2011	Journal of Irrigation and Drainage	116.332	39.9668	Triticum aestivum L.	Monocotyledon	Graminae	Herbaceous	Jointing stage	Preceding period	Tr	0.6	Medium stress	10d	Short-term coercion	3	3	5.66087	0.980491	6.63478	1.14918
46	1047	LIU Ling, HAO Weiping, BAI Qingjun, MEI Xurong, YAN Yongliu	2011	Journal of Irrigation and Drainage	116.332	39.9668	Triticum aestivum L.	Monocotyledon	Graminae	Herbaceous	Jointing stage	Preceding period	Tr	0.4	Heavy stress	10d	Short-term coercion	3	3	3.15652	0.546726	6.63478	1.14918
47	1048	YAN Yongliu, HAO Weiping, BAI Qingjun, MEI Xurong, LIU Ling	2012	Journal of Irrigation and Drainage	116.335	39.9673	Triticum aestivum L.	Monocotyledon	Graminae	Herbaceous	Jointing stage	Preceding period	Yield	0.6	Medium stress	5d	Short-term coercion	3	3	45.107	7.81276	70.012	12.1264
47	1049	YAN Yongliu, HAO Weiping, BAI Qingjun, MEI Xurong, LIU Ling	2012	Journal of Irrigation and Drainage	116.335	39.9673	Triticum aestivum L.	Monocotyledon	Graminae	Herbaceous	Jointing stage	Preceding period	Yield	0.4	Heavy stress	5d	Short-term coercion	3	3	68.057	11.7878	70.012	12.1264
47	1050	YAN Yongliu, HAO Weiping, BAI Qingjun, MEI Xurong, LIU Ling	2012	Journal of Irrigation and Drainage	116.335	39.9673	Triticum aestivum L.	Monocotyledon	Graminae	Herbaceous	Jointing stage	Preceding period	Yield	0.6	Medium stress	10d	Short-term coercion	3	3	36.688	6.35455	70.012	12.1264
47	1051	YAN Yongliu, HAO Weiping, BAI Qingjun, MEI Xurong, LIU Ling	2012	Journal of Irrigation and Drainage	116.335	39.9673	Triticum aestivum L.	Monocotyledon	Graminae	Herbaceous	Jointing stage	Preceding period	Yield	0.4	Heavy stress	10d	Short-term coercion	3	3	59.311	10.273	70.012	12.1264
47	1052	YAN Yongliu, HAO Weiping, BAI Qingjun, MEI Xurong, LIU Ling	2012	Journal of Irrigation and Drainage	116.335	39.9673	Triticum aestivum L.	Monocotyledon	Graminae	Herbaceous	Period of grouting	Mid period	Yield	0.6	Medium stress	5d	Short-term coercion	3	3	33.384	5.78228	70.012	12.1264
47	1053	YAN Yongliu, HAO Weiping, BAI Qingjun, MEI Xurong, LIU Ling	2012	Journal of Irrigation and Drainage	116.335	39.9673	Triticum aestivum L.	Monocotyledon	Graminae	Herbaceous	Period of grouting	Mid period	Yield	0.4	Heavy stress	5d	Short-term coercion	3	3	57.563	9.9702	70.012	12.1264
47	1054	YAN Yongliu, HAO Weiping, BAI Qingjun, MEI Xurong, LIU Ling	2012	Journal of Irrigation and Drainage	116.335	39.9673	Triticum aestivum L.	Monocotyledon	Graminae	Herbaceous	Period of grouting	Mid period	Yield	0.6	Medium stress	10d	Short-term coercion	3	3	36.442	6.31194	70.012	12.1264
47	1055	YAN Yongliu, HAO Weiping, BAI Qingjun, MEI Xurong, LIU Ling	2012	Journal of Irrigation and Drainage	116.335	39.9673	Triticum aestivum L.	Monocotyledon	Graminae	Herbaceous	Period of grouting	Mid period	Yield	0.4	Heavy stress	10d	Short-term coercion	3	3	56.65	9.81207	70.012	12.1264
47	1056	YAN Yongliu, HAO Weiping, BAI Qingjun, MEI Xurong, LIU Ling	2012	Journal of Irrigation and Drainage	116.335	39.9673	Triticum aestivum L.	Monocotyledon	Graminae	Herbaceous	Jointing stage	Preceding period	Yield	0.6	Medium stress	5d	Short-term coercion	3	3	38.95	6.74634	69.792	12.0883
47	1057	YAN Yongliu, HAO Weiping, BAI Qingjun, MEI Xurong, LIU Ling	2012	Journal of Irrigation and Drainage	116.335	39.9673	Triticum aestivum L.	Monocotyledon	Graminae	Herbaceous	Jointing stage	Preceding period	Yield	0.4	Heavy stress	5d	Short-term coercion	3	3	54.334	9.41092	69.792	12.0883
47	1058	YAN Yongliu, HAO Weiping, BAI Qingjun, MEI Xurong, LIU Ling	2012	Journal of Irrigation and Drainage	116.335	39.9673	Triticum aestivum L.	Monocotyledon	Graminae	Herbaceous	Jointing stage	Preceding period	Yield	0.6	Medium stress	10d	Short-term coercion	3	3	31.425	5.44297	69.792	12.0883
47	1059	YAN Yongliu, HAO Weiping, BAI Qingjun, MEI Xurong, LIU Ling	2012	Journal of Irrigation and Drainage	116.335	39.9673	Triticum aestivum L.	Monocotyledon	Graminae	Herbaceous	Jointing stage	Preceding period	Yield	0.4	Heavy stress	10d	Short-term coercion	3	3	49.675	8.60396	69.792	12.0883
47	1060	YAN Yongliu, HAO Weiping, BAI Qingjun, MEI Xurong, LIU Ling	2012	Journal of Irrigation and Drainage	116.335	39.9673	Triticum aestivum L.	Monocotyledon	Graminae	Herbaceous	Period of grouting	Mid period	Yield	0.6	Medium stress	5d	Short-term coercion	3	3	37.8	6.54715	69.792	12.0883
47	1061	YAN Yongliu, HAO Weiping, BAI Qingjun, MEI Xurong, LIU Ling	2012	Journal of Irrigation and Drainage	116.335	39.9673	Triticum aestivum L.	Monocotyledon	Graminae	Herbaceous	Period of grouting	Mid period	Yield	0.4	Heavy stress	5d	Short-term coercion	3	3	45.092	7.81016	69.792	12.0883
47	1062	YAN Yongliu, HAO Weiping, BAI Qingjun, MEI Xurong, LIU Ling	2012	Journal of Irrigation and Drainage	116.335	39.9673	Triticum aestivum L.	Monocotyledon	Graminae	Herbaceous	Period of grouting	Mid period	Yield	0.6	Medium stress	10d	Short-term coercion	3	3	36.953	6.40045	69.792	12.0883
47	1063	YAN Yongliu, HAO Weiping, BAI Qingjun, MEI Xurong, LIU Ling	2012	Journal of Irrigation and Drainage	116.335	39.9673	Triticum aestivum L.	Monocotyledon	Graminae	Herbaceous	Period of grouting	Mid period	Yield	0.4	Heavy stress	10d	Short-term coercion	3	3	40.591	7.03057	69.792	12.0883
47	1064	YAN Yongliu, HAO Weiping, BAI Qingjun, MEI Xurong, LIU Ling	2012	Journal of Irrigation and Drainage	116.335	39.9673	Triticum aestivum L.	Monocotyledon	Graminae	Herbaceous	Jointing stage	Preceding period	WUE	0.6	Medium stress	5d	Short-term coercion	3	3	1.308	0.226552	1.537	0.266216
47	1065	YAN Yongliu, HAO Weiping, BAI Qingjun, MEI Xurong, LIU Ling	2012	Journal of Irrigation and Drainage	116.335	39.9673	Triticum aestivum L.	Monocotyledon	Graminae	Herbaceous	Jointing stage	Preceding period	WUE	0.4	Heavy stress	5d	Short-term coercion	3	3	1.682	0.291331	1.537	0.266216
47	1066	YAN Yongliu, HAO Weiping, BAI Qingjun, MEI Xurong, LIU Ling	2012	Journal of Irrigation and Drainage	116.335	39.9673	Triticum aestivum L.	Monocotyledon	Graminae	Herbaceous	Jointing stage	Preceding period	WUE	0.6	Medium stress	10d	Short-term coercion	3	3	1.154	0.199879	1.537	0.266216
47	1067	YAN Yongliu, HAO Weiping, BAI Qingjun, MEI Xurong, LIU Ling	2012	Journal of Irrigation and Drainage	116.335	39.9673	Triticum aestivum L.	Monocotyledon	Graminae	Herbaceous	Jointing stage	Preceding period	WUE	0.4	Heavy stress	10d	Short-term coercion	3	3	1.497	0.259288	1.537	0.266216
47	1068	YAN Yongliu, HAO Weiping, BAI Qingjun, MEI Xurong, LIU Ling	2012	Journal of Irrigation and Drainage	116.335	39.9673	Triticum aestivum L.	Monocotyledon	Graminae	Herbaceous	Period of grouting	Mid period	WUE	0.6	Medium stress	5d	Short-term coercion	3	3	1.067	0.18481	1.537	0.266216
47	1069	YAN Yongliu, HAO Weiping, BAI Qingjun, MEI Xurong, LIU Ling	2012	Journal of Irrigation and Drainage	116.335	39.9673	Triticum aestivum L.	Monocotyledon	Graminae	Herbaceous	Period of grouting	Mid period	WUE	0.4	Heavy stress	5d	Short-term coercion	3	3	1.462	0.253226	1.537	0.266216
47	1070	YAN Yongliu, HAO Weiping, BAI Qingjun, MEI Xurong, LIU Ling	2012	Journal of Irrigation and Drainage	116.335	39.9673	Triticum aestivum L.	Monocotyledon	Graminae	Herbaceous	Period of grouting	Mid period	WUE	0.6	Medium stress	10d	Short-term coercion	3	3	1.124	0.194683	1.537	0.266216
47	1071	YAN Yongliu, HAO Weiping, BAI Qingjun, MEI Xurong, LIU Ling	2012	Journal of Irrigation and Drainage	116.335	39.9673	Triticum aestivum L.	Monocotyledon	Graminae	Herbaceous	Period of grouting	Mid period	WUE	0.4	Heavy stress	10d	Short-term coercion	3	3	1.525	0.264138	1.537	0.266216
47	1072	YAN Yongliu, HAO Weiping, BAI Qingjun, MEI Xurong, LIU Ling	2012	Journal of Irrigation and Drainage	116.335	39.9673	Triticum aestivum L.	Monocotyledon	Graminae	Herbaceous	Jointing stage	Preceding period	WUE	0.6	Medium stress	5d	Short-term coercion	3	3	0.932	0.161427	1.455	0.252013
47	1073	YAN Yongliu, HAO Weiping, BAI Qingjun, MEI Xurong, LIU Ling	2012	Journal of Irrigation and Drainage	116.335	39.9673	Triticum aestivum L.	Monocotyledon	Graminae	Herbaceous	Jointing stage	Preceding period	WUE	0.4	Heavy stress	5d	Short-term coercion	3	3	1.25	0.216506	1.455	0.252013
47	1074	YAN Yongliu, HAO Weiping, BAI Qingjun, MEI Xurong, LIU Ling	2012	Journal of Irrigation and Drainage	116.335	39.9673	Triticum aestivum L.	Monocotyledon	Graminae	Herbaceous	Jointing stage	Preceding period	WUE	0.6	Medium stress	10d	Short-term coercion	3	3	0.879	0.152247	1.455	0.252013
47	1075	YAN Yongliu, HAO Weiping, BAI Qingjun, MEI Xurong, LIU Ling	2012	Journal of Irrigation and Drainage	116.335	39.9673	Triticum aestivum L.	Monocotyledon	Graminae	Herbaceous	Jointing stage	Preceding period	WUE	0.4	Heavy stress	10d	Short-term coercion	3	3	1.171	0.202823	1.455	0.252013
47	1076	YAN Yongliu, HAO Weiping, BAI Qingjun, MEI Xurong, LIU Ling	2012	Journal of Irrigation and Drainage	116.335	39.9673	Triticum aestivum L.	Monocotyledon	Graminae	Herbaceous	Period of grouting	Mid period	WUE	0.6	Medium stress	5d	Short-term coercion	3	3	0.939	0.16264	1.455	0.252013
47	1077	YAN Yongliu, HAO Weiping, BAI Qingjun, MEI Xurong, LIU Ling	2012	Journal of Irrigation and Drainage	116.335	39.9673	Triticum aestivum L.	Monocotyledon	Graminae	Herbaceous	Period of grouting	Mid period	WUE	0.4	Heavy stress	5d	Short-term coercion	3	3	1.022	0.177016	1.455	0.252013
47	1078	YAN Yongliu, HAO Weiping, BAI Qingjun, MEI Xurong, LIU Ling	2012	Journal of Irrigation and Drainage	116.335	39.9673	Triticum aestivum L.	Monocotyledon	Graminae	Herbaceous	Period of grouting	Mid period	WUE	0.6	Medium stress	10d	Short-term coercion	3	3	1.035	0.179267	1.455	0.252013
47	1079	YAN Yongliu, HAO Weiping, BAI Qingjun, MEI Xurong, LIU Ling	2012	Journal of Irrigation and Drainage	116.335	39.9673	Triticum aestivum L.	Monocotyledon	Graminae	Herbaceous	Period of grouting	Mid period	WUE	0.4	Heavy stress	10d	Short-term coercion	3	3	1.085	0.187928	1.455	0.252013
48	1080	LI Yanbin, BIAN Zepeng, LI Daoxi, LOU Ｒuitao, ZHU Yanan	2020	China Rural Water and Hydropower	116.329	39.9666	Triticum aestivum L.	Monocotyledon	Graminae	Herbaceous	Jointing stage	Preceding period	Yield	0.6	Medium stress	14d	Short-term coercion	3	3	53.61	9.28552	57.51	9.96102
48	1081	LI Yanbin, BIAN Zepeng, LI Daoxi, LOU Ｒuitao, ZHU Yanan	2020	China Rural Water and Hydropower	116.329	39.9666	Triticum aestivum L.	Monocotyledon	Graminae	Herbaceous	Jointing stage	Preceding period	Yield	0.5	Medium stress	14d	Short-term coercion	3	3	47.59	8.24283	57.51	9.96102
48	1082	LI Yanbin, BIAN Zepeng, LI Daoxi, LOU Ｒuitao, ZHU Yanan	2020	China Rural Water and Hydropower	116.329	39.9666	Triticum aestivum L.	Monocotyledon	Graminae	Herbaceous	Jointing stage	Preceding period	Yield	0.4	Heavy stress	14d	Short-term coercion	3	3	32.79	5.67939	57.51	9.96102
48	1083	LI Yanbin, BIAN Zepeng, LI Daoxi, LOU Ｒuitao, ZHU Yanan	2020	China Rural Water and Hydropower	116.329	39.9666	Triticum aestivum L.	Monocotyledon	Graminae	Herbaceous	Tasseling stage	Mid period	Yield	0.6	Medium stress	14d	Short-term coercion	3	3	54.81	9.49337	57.51	9.96102
48	1084	LI Yanbin, BIAN Zepeng, LI Daoxi, LOU Ｒuitao, ZHU Yanan	2020	China Rural Water and Hydropower	116.329	39.9666	Triticum aestivum L.	Monocotyledon	Graminae	Herbaceous	Tasseling stage	Mid period	Yield	0.5	Medium stress	14d	Short-term coercion	3	3	48.66	8.42816	57.51	9.96102
48	1085	LI Yanbin, BIAN Zepeng, LI Daoxi, LOU Ｒuitao, ZHU Yanan	2020	China Rural Water and Hydropower	116.329	39.9666	Triticum aestivum L.	Monocotyledon	Graminae	Herbaceous	Tasseling stage	Mid period	Yield	0.4	Heavy stress	14d	Short-term coercion	3	3	45.94	7.95704	57.51	9.96102
48	1086	LI Yanbin, BIAN Zepeng, LI Daoxi, LOU Ｒuitao, ZHU Yanan	2020	China Rural Water and Hydropower	116.329	39.9666	Triticum aestivum L.	Monocotyledon	Graminae	Herbaceous	Jointing stage	Preceding period	WUE	0.6	Medium stress	14d	Short-term coercion	3	3	1.488	0.257729	1.349	0.233654
48	1087	LI Yanbin, BIAN Zepeng, LI Daoxi, LOU Ｒuitao, ZHU Yanan	2020	China Rural Water and Hydropower	116.329	39.9666	Triticum aestivum L.	Monocotyledon	Graminae	Herbaceous	Jointing stage	Preceding period	WUE	0.5	Medium stress	14d	Short-term coercion	3	3	1.374	0.237984	1.349	0.233654
48	1088	LI Yanbin, BIAN Zepeng, LI Daoxi, LOU Ｒuitao, ZHU Yanan	2020	China Rural Water and Hydropower	116.329	39.9666	Triticum aestivum L.	Monocotyledon	Graminae	Herbaceous	Jointing stage	Preceding period	WUE	0.4	Heavy stress	14d	Short-term coercion	3	3	1.04	0.180133	1.349	0.233654
48	1089	LI Yanbin, BIAN Zepeng, LI Daoxi, LOU Ｒuitao, ZHU Yanan	2020	China Rural Water and Hydropower	116.329	39.9666	Triticum aestivum L.	Monocotyledon	Graminae	Herbaceous	Tasseling stage	Mid period	WUE	0.6	Medium stress	14d	Short-term coercion	3	3	1.43	0.247683	1.349	0.233654
48	1090	LI Yanbin, BIAN Zepeng, LI Daoxi, LOU Ｒuitao, ZHU Yanan	2020	China Rural Water and Hydropower	116.329	39.9666	Triticum aestivum L.	Monocotyledon	Graminae	Herbaceous	Tasseling stage	Mid period	WUE	0.5	Medium stress	14d	Short-term coercion	3	3	1.401	0.24266	1.349	0.233654
48	1091	LI Yanbin, BIAN Zepeng, LI Daoxi, LOU Ｒuitao, ZHU Yanan	2020	China Rural Water and Hydropower	116.329	39.9666	Triticum aestivum L.	Monocotyledon	Graminae	Herbaceous	Tasseling stage	Mid period	WUE	0.4	Heavy stress	14d	Short-term coercion	3	3	1.39	0.240755	1.349	0.233654
48	1092	LI Yanbin, BIAN Zepeng, LI Daoxi, LOU Ｒuitao, ZHU Yanan	2020	China Rural Water and Hydropower	116.329	39.9666	Triticum aestivum L.	Monocotyledon	Graminae	Herbaceous	Jointing stage	Preceding period	Pn	0.6	Medium stress	14d	Short-term coercion	3	3	20.1995	9.58891	22.3691	10.1072
48	1093	LI Yanbin, BIAN Zepeng, LI Daoxi, LOU Ｒuitao, ZHU Yanan	2020	China Rural Water and Hydropower	116.329	39.9666	Triticum aestivum L.	Monocotyledon	Graminae	Herbaceous	Jointing stage	Preceding period	Pn	0.5	Medium stress	14d	Short-term coercion	3	3	16.3092	10.3664	22.3691	10.1072
48	1094	LI Yanbin, BIAN Zepeng, LI Daoxi, LOU Ｒuitao, ZHU Yanan	2020	China Rural Water and Hydropower	116.329	39.9666	Triticum aestivum L.	Monocotyledon	Graminae	Herbaceous	Jointing stage	Preceding period	Pn	0.4	Heavy stress	14d	Short-term coercion	3	3	12.8678	5.18319	22.3691	10.1072
48	1095	LI Yanbin, BIAN Zepeng, LI Daoxi, LOU Ｒuitao, ZHU Yanan	2020	China Rural Water and Hydropower	116.329	39.9666	Triticum aestivum L.	Monocotyledon	Graminae	Herbaceous	Tasseling stage	Mid period	Pn	0.6	Medium stress	14d	Short-term coercion	3	3	21.0973	4.66487	21.5461	4.14656
48	1096	LI Yanbin, BIAN Zepeng, LI Daoxi, LOU Ｒuitao, ZHU Yanan	2020	China Rural Water and Hydropower	116.329	39.9666	Triticum aestivum L.	Monocotyledon	Graminae	Herbaceous	Tasseling stage	Mid period	Pn	0.5	Medium stress	14d	Short-term coercion	3	3	18.3292	3.62824	21.5461	4.14656
48	1097	LI Yanbin, BIAN Zepeng, LI Daoxi, LOU Ｒuitao, ZHU Yanan	2020	China Rural Water and Hydropower	116.329	39.9666	Triticum aestivum L.	Monocotyledon	Graminae	Herbaceous	Tasseling stage	Mid period	Pn	0.4	Heavy stress	14d	Short-term coercion	3	3	12.1197	8.81143	21.5461	4.14656
48	1098	LI Yanbin, BIAN Zepeng, LI Daoxi, LOU Ｒuitao, ZHU Yanan	2020	China Rural Water and Hydropower	116.329	39.9666	Triticum aestivum L.	Monocotyledon	Graminae	Herbaceous	Jointing stage	Preceding period	Gs	0.6	Medium stress	14d	Short-term coercion	3	3	0.244	0.166277	0.319	0.0935307
48	1099	LI Yanbin, BIAN Zepeng, LI Daoxi, LOU Ｒuitao, ZHU Yanan	2020	China Rural Water and Hydropower	116.329	39.9666	Triticum aestivum L.	Monocotyledon	Graminae	Herbaceous	Jointing stage	Preceding period	Gs	0.5	Medium stress	14d	Short-term coercion	3	3	0.19	0.0900666	0.319	0.0935307
48	1100	LI Yanbin, BIAN Zepeng, LI Daoxi, LOU Ｒuitao, ZHU Yanan	2020	China Rural Water and Hydropower	116.329	39.9666	Triticum aestivum L.	Monocotyledon	Graminae	Herbaceous	Jointing stage	Preceding period	Gs	0.4	Heavy stress	14d	Short-term coercion	3	3	0.176	0.0969948	0.319	0.0935307
48	1101	LI Yanbin, BIAN Zepeng, LI Daoxi, LOU Ｒuitao, ZHU Yanan	2020	China Rural Water and Hydropower	116.329	39.9666	Triticum aestivum L.	Monocotyledon	Graminae	Herbaceous	Tasseling stage	Mid period	Gs	0.6	Medium stress	14d	Short-term coercion	3	3	0.341646	0.207328	0.360349	0.19005
48	1102	LI Yanbin, BIAN Zepeng, LI Daoxi, LOU Ｒuitao, ZHU Yanan	2020	China Rural Water and Hydropower	116.329	39.9666	Triticum aestivum L.	Monocotyledon	Graminae	Herbaceous	Tasseling stage	Mid period	Gs	0.5	Medium stress	14d	Short-term coercion	3	3	0.28803	0.103664	0.360349	0.19005
48	1103	LI Yanbin, BIAN Zepeng, LI Daoxi, LOU Ｒuitao, ZHU Yanan	2020	China Rural Water and Hydropower	116.329	39.9666	Triticum aestivum L.	Monocotyledon	Graminae	Herbaceous	Tasseling stage	Mid period	Gs	0.4	Heavy stress	14d	Short-term coercion	3	3	0.200748	0.19005	0.360349	0.19005
48	1104	LI Yanbin, BIAN Zepeng, LI Daoxi, LOU Ｒuitao, ZHU Yanan	2020	China Rural Water and Hydropower	116.329	39.9666	Triticum aestivum L.	Monocotyledon	Graminae	Herbaceous	Jointing stage	Preceding period	Ci	0.6	Medium stress	14d	Short-term coercion	3	3	262.69	29.014	284.01	35.6082
48	1105	LI Yanbin, BIAN Zepeng, LI Daoxi, LOU Ｒuitao, ZHU Yanan	2020	China Rural Water and Hydropower	116.329	39.9666	Triticum aestivum L.	Monocotyledon	Graminae	Herbaceous	Jointing stage	Preceding period	Ci	0.5	Medium stress	14d	Short-term coercion	3	3	254.315	34.2893	284.01	35.6082
48	1106	LI Yanbin, BIAN Zepeng, LI Daoxi, LOU Ｒuitao, ZHU Yanan	2020	China Rural Water and Hydropower	116.329	39.9666	Triticum aestivum L.	Monocotyledon	Graminae	Herbaceous	Jointing stage	Preceding period	Ci	0.4	Heavy stress	14d	Short-term coercion	3	3	258.122	40.8834	284.01	35.6082
48	1107	LI Yanbin, BIAN Zepeng, LI Daoxi, LOU Ｒuitao, ZHU Yanan	2020	China Rural Water and Hydropower	116.329	39.9666	Triticum aestivum L.	Monocotyledon	Graminae	Herbaceous	Tasseling stage	Mid period	Ci	0.6	Medium stress	14d	Short-term coercion	3	3	281.923	49.2968	291.154	50.6292
48	1108	LI Yanbin, BIAN Zepeng, LI Daoxi, LOU Ｒuitao, ZHU Yanan	2020	China Rural Water and Hydropower	116.329	39.9666	Triticum aestivum L.	Monocotyledon	Graminae	Herbaceous	Tasseling stage	Mid period	Ci	0.5	Medium stress	14d	Short-term coercion	3	3	285.769	22.6499	291.154	50.6292
48	1109	LI Yanbin, BIAN Zepeng, LI Daoxi, LOU Ｒuitao, ZHU Yanan	2020	China Rural Water and Hydropower	116.329	39.9666	Triticum aestivum L.	Monocotyledon	Graminae	Herbaceous	Tasseling stage	Mid period	Ci	0.4	Heavy stress	14d	Short-term coercion	3	3	289.615	87.9349	291.154	50.6292
49	1110	ZHNAG Junjie, CHEN Jinping, TANG Yulou, ZHANG Rui, CAO Hongzhang, WANG Lijuan, MA Mengjin, WANG Hao, WANG Yongchao, GUO Jiameng, KRISHNA SV Jagadish, YANG Qinghua, SHAO Ruixin	2023	Acta Agronomica Sinica	115.604	34.5239	Zea mays L.	Monocotyledon	Graminae	Herbaceous	The flowering period	Mid period	SPAD	70%Etc	Mild stress	30d	Medium-term stress	3	3	31.4723	10.0678	43.9388	23.8447
49	1111	ZHNAG Junjie, CHEN Jinping, TANG Yulou, ZHANG Rui, CAO Hongzhang, WANG Lijuan, MA Mengjin, WANG Hao, WANG Yongchao, GUO Jiameng, KRISHNA SV Jagadish, YANG Qinghua, SHAO Ruixin	2023	Acta Agronomica Sinica	115.604	34.5239	Zea mays L.	Monocotyledon	Graminae	Herbaceous	The flowering period	Mid period	SPAD	40%Etc	Heavy stress	30d	Medium-term stress	3	3	29.4837	14.3068	43.9388	23.8447
49	1112	ZHNAG Junjie, CHEN Jinping, TANG Yulou, ZHANG Rui, CAO Hongzhang, WANG Lijuan, MA Mengjin, WANG Hao, WANG Yongchao, GUO Jiameng, KRISHNA SV Jagadish, YANG Qinghua, SHAO Ruixin	2023	Acta Agronomica Sinica	115.604	34.5239	Zea mays L.	Monocotyledon	Graminae	Herbaceous	The flowering period	Mid period	SPAD	100%Etc	Mild stress	30d	Medium-term stress	3	3	28.6424	8.21317	43.9388	23.8447
49	1113	ZHNAG Junjie, CHEN Jinping, TANG Yulou, ZHANG Rui, CAO Hongzhang, WANG Lijuan, MA Mengjin, WANG Hao, WANG Yongchao, GUO Jiameng, KRISHNA SV Jagadish, YANG Qinghua, SHAO Ruixin	2023	Acta Agronomica Sinica	115.604	34.5239	Zea mays L.	Monocotyledon	Graminae	Herbaceous	The flowering period	Mid period	SPAD	70%Etc	Mild stress	30d	Medium-term stress	3	3	37.1319	4.76894	38.0497	9.80281
49	1114	ZHNAG Junjie, CHEN Jinping, TANG Yulou, ZHANG Rui, CAO Hongzhang, WANG Lijuan, MA Mengjin, WANG Hao, WANG Yongchao, GUO Jiameng, KRISHNA SV Jagadish, YANG Qinghua, SHAO Ruixin	2023	Acta Agronomica Sinica	115.604	34.5239	Zea mays L.	Monocotyledon	Graminae	Herbaceous	The flowering period	Mid period	SPAD	40%Etc	Heavy stress	30d	Medium-term stress	3	3	34.608	6.88846	38.0497	9.80281
49	1115	ZHNAG Junjie, CHEN Jinping, TANG Yulou, ZHANG Rui, CAO Hongzhang, WANG Lijuan, MA Mengjin, WANG Hao, WANG Yongchao, GUO Jiameng, KRISHNA SV Jagadish, YANG Qinghua, SHAO Ruixin	2023	Acta Agronomica Sinica	115.604	34.5239	Zea mays L.	Monocotyledon	Graminae	Herbaceous	The flowering period	Mid period	SPAD	100%Etc	Mild stress	30d	Medium-term stress	3	3	32.4665	14.3068	38.0497	9.80281
49	1116	ZHNAG Junjie, CHEN Jinping, TANG Yulou, ZHANG Rui, CAO Hongzhang, WANG Lijuan, MA Mengjin, WANG Hao, WANG Yongchao, GUO Jiameng, KRISHNA SV Jagadish, YANG Qinghua, SHAO Ruixin	2023	Acta Agronomica Sinica	115.604	34.5239	Zea mays L.	Monocotyledon	Graminae	Herbaceous	The flowering period	Mid period	Ci	70%Etc	Mild stress	30d	Medium-term stress	3	3	73.5192	7.24202	72.9965	16.8981
49	1117	ZHNAG Junjie, CHEN Jinping, TANG Yulou, ZHANG Rui, CAO Hongzhang, WANG Lijuan, MA Mengjin, WANG Hao, WANG Yongchao, GUO Jiameng, KRISHNA SV Jagadish, YANG Qinghua, SHAO Ruixin	2023	Acta Agronomica Sinica	115.604	34.5239	Zea mays L.	Monocotyledon	Graminae	Herbaceous	The flowering period	Mid period	Ci	40%Etc	Heavy stress	30d	Medium-term stress	3	3	83.101	3.62101	72.9965	16.8981
49	1118	ZHNAG Junjie, CHEN Jinping, TANG Yulou, ZHANG Rui, CAO Hongzhang, WANG Lijuan, MA Mengjin, WANG Hao, WANG Yongchao, GUO Jiameng, KRISHNA SV Jagadish, YANG Qinghua, SHAO Ruixin	2023	Acta Agronomica Sinica	115.604	34.5239	Zea mays L.	Monocotyledon	Graminae	Herbaceous	The flowering period	Mid period	Ci	100%Etc	Mild stress	30d	Medium-term stress	3	3	83.9721	17.5016	72.9965	16.8981
49	1119	ZHNAG Junjie, CHEN Jinping, TANG Yulou, ZHANG Rui, CAO Hongzhang, WANG Lijuan, MA Mengjin, WANG Hao, WANG Yongchao, GUO Jiameng, KRISHNA SV Jagadish, YANG Qinghua, SHAO Ruixin	2023	Acta Agronomica Sinica	115.604	34.5239	Zea mays L.	Monocotyledon	Graminae	Herbaceous	The flowering period	Mid period	Pn	70%Etc	Mild stress	30d	Medium-term stress	3	3	23.3333	3.27054	27.9191	9.57801
49	1120	ZHNAG Junjie, CHEN Jinping, TANG Yulou, ZHANG Rui, CAO Hongzhang, WANG Lijuan, MA Mengjin, WANG Hao, WANG Yongchao, GUO Jiameng, KRISHNA SV Jagadish, YANG Qinghua, SHAO Ruixin	2023	Acta Agronomica Sinica	115.604	34.5239	Zea mays L.	Monocotyledon	Graminae	Herbaceous	The flowering period	Mid period	Pn	40%Etc	Heavy stress	30d	Medium-term stress	3	3	20.7033	6.54108	27.9191	9.57801
49	1121	ZHNAG Junjie, CHEN Jinping, TANG Yulou, ZHANG Rui, CAO Hongzhang, WANG Lijuan, MA Mengjin, WANG Hao, WANG Yongchao, GUO Jiameng, KRISHNA SV Jagadish, YANG Qinghua, SHAO Ruixin	2023	Acta Agronomica Sinica	115.604	34.5239	Zea mays L.	Monocotyledon	Graminae	Herbaceous	The flowering period	Mid period	Pn	100%Etc	Mild stress	30d	Medium-term stress	3	3	19.1522	9.3444	27.9191	9.57801
49	1122	ZHNAG Junjie, CHEN Jinping, TANG Yulou, ZHANG Rui, CAO Hongzhang, WANG Lijuan, MA Mengjin, WANG Hao, WANG Yongchao, GUO Jiameng, KRISHNA SV Jagadish, YANG Qinghua, SHAO Ruixin	2023	Acta Agronomica Sinica	115.604	34.5239	Zea mays L.	Monocotyledon	Graminae	Herbaceous	The flowering period	Mid period	Yield	70%Etc	Mild stress	30d	Medium-term stress	3	3	132.31	3.86247	154.79	2.84056
49	1123	ZHNAG Junjie, CHEN Jinping, TANG Yulou, ZHANG Rui, CAO Hongzhang, WANG Lijuan, MA Mengjin, WANG Hao, WANG Yongchao, GUO Jiameng, KRISHNA SV Jagadish, YANG Qinghua, SHAO Ruixin	2023	Acta Agronomica Sinica	115.604	34.5239	Zea mays L.	Monocotyledon	Graminae	Herbaceous	The flowering period	Mid period	Yield	40%Etc	Heavy stress	30d	Medium-term stress	3	3	98	8.40045	154.79	2.84056
49	1124	ZHNAG Junjie, CHEN Jinping, TANG Yulou, ZHANG Rui, CAO Hongzhang, WANG Lijuan, MA Mengjin, WANG Hao, WANG Yongchao, GUO Jiameng, KRISHNA SV Jagadish, YANG Qinghua, SHAO Ruixin	2023	Acta Agronomica Sinica	115.604	34.5239	Zea mays L.	Monocotyledon	Graminae	Herbaceous	The flowering period	Mid period	Yield	100%Etc	Mild stress	30d	Medium-term stress	3	3	93.14	4.34745	154.79	2.84056
49	1125	ZHNAG Junjie, CHEN Jinping, TANG Yulou, ZHANG Rui, CAO Hongzhang, WANG Lijuan, MA Mengjin, WANG Hao, WANG Yongchao, GUO Jiameng, KRISHNA SV Jagadish, YANG Qinghua, SHAO Ruixin	2023	Acta Agronomica Sinica	115.604	34.5239	Zea mays L.	Monocotyledon	Graminae	Herbaceous	The flowering period	Mid period	Yield	70%Etc	Mild stress	30d	Medium-term stress	3	3	106.56	2.77128	132.57	2.65004
49	1126	ZHNAG Junjie, CHEN Jinping, TANG Yulou, ZHANG Rui, CAO Hongzhang, WANG Lijuan, MA Mengjin, WANG Hao, WANG Yongchao, GUO Jiameng, KRISHNA SV Jagadish, YANG Qinghua, SHAO Ruixin	2023	Acta Agronomica Sinica	115.604	34.5239	Zea mays L.	Monocotyledon	Graminae	Herbaceous	The flowering period	Mid period	Yield	40%Etc	Heavy stress	30d	Medium-term stress	3	3	72.67	2.0265	132.57	2.65004
49	1127	ZHNAG Junjie, CHEN Jinping, TANG Yulou, ZHANG Rui, CAO Hongzhang, WANG Lijuan, MA Mengjin, WANG Hao, WANG Yongchao, GUO Jiameng, KRISHNA SV Jagadish, YANG Qinghua, SHAO Ruixin	2023	Acta Agronomica Sinica	115.604	34.5239	Zea mays L.	Monocotyledon	Graminae	Herbaceous	The flowering period	Mid period	Yield	100%Etc	Mild stress	30d	Medium-term stress	3	3	60.43	2.44219	132.57	2.65004
49	1128	ZHNAG Junjie, CHEN Jinping, TANG Yulou, ZHANG Rui, CAO Hongzhang, WANG Lijuan, MA Mengjin, WANG Hao, WANG Yongchao, GUO Jiameng, KRISHNA SV Jagadish, YANG Qinghua, SHAO Ruixin	2023	Acta Agronomica Sinica	115.604	34.5239	Zea mays L.	Monocotyledon	Graminae	Herbaceous	The flowering period	Mid period	WUE	70%Etc	Mild stress	30d	Medium-term stress	3	3	16.88	0.155885	19.58	0.0866025
49	1129	ZHNAG Junjie, CHEN Jinping, TANG Yulou, ZHANG Rui, CAO Hongzhang, WANG Lijuan, MA Mengjin, WANG Hao, WANG Yongchao, GUO Jiameng, KRISHNA SV Jagadish, YANG Qinghua, SHAO Ruixin	2023	Acta Agronomica Sinica	115.604	34.5239	Zea mays L.	Monocotyledon	Graminae	Herbaceous	The flowering period	Mid period	WUE	40%Etc	Heavy stress	30d	Medium-term stress	3	3	12.33	0.0519615	19.58	0.0866025
49	1130	ZHNAG Junjie, CHEN Jinping, TANG Yulou, ZHANG Rui, CAO Hongzhang, WANG Lijuan, MA Mengjin, WANG Hao, WANG Yongchao, GUO Jiameng, KRISHNA SV Jagadish, YANG Qinghua, SHAO Ruixin	2023	Acta Agronomica Sinica	115.604	34.5239	Zea mays L.	Monocotyledon	Graminae	Herbaceous	The flowering period	Mid period	WUE	100%Etc	Mild stress	30d	Medium-term stress	3	3	11.77	0.121244	19.58	0.0866025
49	1131	ZHNAG Junjie, CHEN Jinping, TANG Yulou, ZHANG Rui, CAO Hongzhang, WANG Lijuan, MA Mengjin, WANG Hao, WANG Yongchao, GUO Jiameng, KRISHNA SV Jagadish, YANG Qinghua, SHAO Ruixin	2023	Acta Agronomica Sinica	115.604	34.5239	Zea mays L.	Monocotyledon	Graminae	Herbaceous	The flowering period	Mid period	WUE	70%Etc	Mild stress	30d	Medium-term stress	3	3	11.06	0.103923	13.71	0.103923
49	1132	ZHNAG Junjie, CHEN Jinping, TANG Yulou, ZHANG Rui, CAO Hongzhang, WANG Lijuan, MA Mengjin, WANG Hao, WANG Yongchao, GUO Jiameng, KRISHNA SV Jagadish, YANG Qinghua, SHAO Ruixin	2023	Acta Agronomica Sinica	115.604	34.5239	Zea mays L.	Monocotyledon	Graminae	Herbaceous	The flowering period	Mid period	WUE	40%Etc	Heavy stress	30d	Medium-term stress	3	3	7.43	0.034641	13.71	0.103923
49	1133	ZHNAG Junjie, CHEN Jinping, TANG Yulou, ZHANG Rui, CAO Hongzhang, WANG Lijuan, MA Mengjin, WANG Hao, WANG Yongchao, GUO Jiameng, KRISHNA SV Jagadish, YANG Qinghua, SHAO Ruixin	2023	Acta Agronomica Sinica	115.604	34.5239	Zea mays L.	Monocotyledon	Graminae	Herbaceous	The flowering period	Mid period	WUE	100%Etc	Mild stress	30d	Medium-term stress	3	3	6.22	0.069282	13.71	0.103923
50	1134	NIU Jing, ZHNAG Lei, ZHANG Siping, LIU Shaodong, MA Huijuan, ZHAO Xinhua	2016	Cotton Science	114.496	36.0683	Gossypium spp	Dicotyledons	Malvaceae	Woody	Bud stage	Mid period	Plant height	0.6	Medium stress	3d	Short-term coercion	3	3	85.33	14.7796	84.67	14.6653
50	1135	NIU Jing, ZHNAG Lei, ZHANG Siping, LIU Shaodong, MA Huijuan, ZHAO Xinhua	2016	Cotton Science	114.496	36.0683	Gossypium spp	Dicotyledons	Malvaceae	Woody	Bud stage	Mid period	Plant height	0.45	Heavy stress	3d	Short-term coercion	3	3	86.33	14.9528	84.67	14.6653
50	1136	NIU Jing, ZHNAG Lei, ZHANG Siping, LIU Shaodong, MA Huijuan, ZHAO Xinhua	2016	Cotton Science	114.496	36.0683	Gossypium spp	Dicotyledons	Malvaceae	Woody	Bud stage	Mid period	Plant height	0.6	Medium stress	6d	Short-term coercion	3	3	87	15.0688	84.67	14.6653
50	1137	NIU Jing, ZHNAG Lei, ZHANG Siping, LIU Shaodong, MA Huijuan, ZHAO Xinhua	2016	Cotton Science	114.496	36.0683	Gossypium spp	Dicotyledons	Malvaceae	Woody	Bud stage	Mid period	Plant height	0.45	Heavy stress	6d	Short-term coercion	3	3	85.67	14.8385	84.67	14.6653
50	1138	NIU Jing, ZHNAG Lei, ZHANG Siping, LIU Shaodong, MA Huijuan, ZHAO Xinhua	2016	Cotton Science	114.496	36.0683	Gossypium spp	Dicotyledons	Malvaceae	Woody	Bud stage	Mid period	Plant height	0.6	Medium stress	9d	Short-term coercion	3	3	72	12.4708	84.67	14.6653
50	1139	NIU Jing, ZHNAG Lei, ZHANG Siping, LIU Shaodong, MA Huijuan, ZHAO Xinhua	2016	Cotton Science	114.496	36.0683	Gossypium spp	Dicotyledons	Malvaceae	Woody	Bud stage	Mid period	Plant height	0.45	Heavy stress	9d	Short-term coercion	3	3	70.67	12.2404	84.67	14.6653
50	1140	NIU Jing, ZHNAG Lei, ZHANG Siping, LIU Shaodong, MA Huijuan, ZHAO Xinhua	2016	Cotton Science	114.496	36.0683	Gossypium spp	Dicotyledons	Malvaceae	Woody	Bud stage	Mid period	Plant height	0.6	Medium stress	3d	Short-term coercion	3	3	110.67	19.1686	110.33	19.1097
50	1141	NIU Jing, ZHNAG Lei, ZHANG Siping, LIU Shaodong, MA Huijuan, ZHAO Xinhua	2016	Cotton Science	114.496	36.0683	Gossypium spp	Dicotyledons	Malvaceae	Woody	Bud stage	Mid period	Plant height	0.45	Heavy stress	3d	Short-term coercion	3	3	111.67	19.3418	110.33	19.1097
50	1142	NIU Jing, ZHNAG Lei, ZHANG Siping, LIU Shaodong, MA Huijuan, ZHAO Xinhua	2016	Cotton Science	114.496	36.0683	Gossypium spp	Dicotyledons	Malvaceae	Woody	Bud stage	Mid period	Plant height	0.6	Medium stress	6d	Short-term coercion	3	3	112.33	19.4561	110.33	19.1097
50	1143	NIU Jing, ZHNAG Lei, ZHANG Siping, LIU Shaodong, MA Huijuan, ZHAO Xinhua	2016	Cotton Science	114.496	36.0683	Gossypium spp	Dicotyledons	Malvaceae	Woody	Bud stage	Mid period	Plant height	0.45	Heavy stress	6d	Short-term coercion	3	3	111.67	19.3418	110.33	19.1097
50	1144	NIU Jing, ZHNAG Lei, ZHANG Siping, LIU Shaodong, MA Huijuan, ZHAO Xinhua	2016	Cotton Science	114.496	36.0683	Gossypium spp	Dicotyledons	Malvaceae	Woody	Bud stage	Mid period	Plant height	0.6	Medium stress	9d	Short-term coercion	3	3	101.33	17.5509	110.33	19.1097
50	1145	NIU Jing, ZHNAG Lei, ZHANG Siping, LIU Shaodong, MA Huijuan, ZHAO Xinhua	2016	Cotton Science	114.496	36.0683	Gossypium spp	Dicotyledons	Malvaceae	Woody	Bud stage	Mid period	Plant height	0.45	Heavy stress	9d	Short-term coercion	3	3	100.67	17.4366	110.33	19.1097
50	1146	NIU Jing, ZHNAG Lei, ZHANG Siping, LIU Shaodong, MA Huijuan, ZHAO Xinhua	2016	Cotton Science	114.496	36.0683	Gossypium spp	Dicotyledons	Malvaceae	Woody	Bud stage	Mid period	Plant height	0.6	Medium stress	3d	Short-term coercion	3	3	95.67	16.5705	93.67	16.2241
50	1147	NIU Jing, ZHNAG Lei, ZHANG Siping, LIU Shaodong, MA Huijuan, ZHAO Xinhua	2016	Cotton Science	114.496	36.0683	Gossypium spp	Dicotyledons	Malvaceae	Woody	Bud stage	Mid period	Plant height	0.45	Heavy stress	3d	Short-term coercion	3	3	96.33	16.6848	93.67	16.2241
50	1148	NIU Jing, ZHNAG Lei, ZHANG Siping, LIU Shaodong, MA Huijuan, ZHAO Xinhua	2016	Cotton Science	114.496	36.0683	Gossypium spp	Dicotyledons	Malvaceae	Woody	Bud stage	Mid period	Plant height	0.6	Medium stress	6d	Short-term coercion	3	3	94	16.2813	93.67	16.2241
50	1149	NIU Jing, ZHNAG Lei, ZHANG Siping, LIU Shaodong, MA Huijuan, ZHAO Xinhua	2016	Cotton Science	114.496	36.0683	Gossypium spp	Dicotyledons	Malvaceae	Woody	Bud stage	Mid period	Plant height	0.45	Heavy stress	6d	Short-term coercion	3	3	92	15.9349	93.67	16.2241
50	1150	NIU Jing, ZHNAG Lei, ZHANG Siping, LIU Shaodong, MA Huijuan, ZHAO Xinhua	2016	Cotton Science	114.496	36.0683	Gossypium spp	Dicotyledons	Malvaceae	Woody	Bud stage	Mid period	Plant height	0.6	Medium stress	9d	Short-term coercion	3	3	80	13.8564	93.67	16.2241
50	1151	NIU Jing, ZHNAG Lei, ZHANG Siping, LIU Shaodong, MA Huijuan, ZHAO Xinhua	2016	Cotton Science	114.496	36.0683	Gossypium spp	Dicotyledons	Malvaceae	Woody	Bud stage	Mid period	Plant height	0.45	Heavy stress	9d	Short-term coercion	3	3	76	13.1636	93.67	16.2241
50	1152	NIU Jing, ZHNAG Lei, ZHANG Siping, LIU Shaodong, MA Huijuan, ZHAO Xinhua	2016	Cotton Science	114.496	36.0683	Gossypium spp	Dicotyledons	Malvaceae	Woody	Bud stage	Mid period	Plant height	0.6	Medium stress	3d	Short-term coercion	3	3	122	21.131	120	20.7846
50	1153	NIU Jing, ZHNAG Lei, ZHANG Siping, LIU Shaodong, MA Huijuan, ZHAO Xinhua	2016	Cotton Science	114.496	36.0683	Gossypium spp	Dicotyledons	Malvaceae	Woody	Bud stage	Mid period	Plant height	0.45	Heavy stress	3d	Short-term coercion	3	3	122.67	21.2471	120	20.7846
50	1154	NIU Jing, ZHNAG Lei, ZHANG Siping, LIU Shaodong, MA Huijuan, ZHAO Xinhua	2016	Cotton Science	114.496	36.0683	Gossypium spp	Dicotyledons	Malvaceae	Woody	Bud stage	Mid period	Plant height	0.6	Medium stress	6d	Short-term coercion	3	3	121.67	21.0739	120	20.7846
50	1155	NIU Jing, ZHNAG Lei, ZHANG Siping, LIU Shaodong, MA Huijuan, ZHAO Xinhua	2016	Cotton Science	114.496	36.0683	Gossypium spp	Dicotyledons	Malvaceae	Woody	Bud stage	Mid period	Plant height	0.45	Heavy stress	6d	Short-term coercion	3	3	108.33	18.7633	120	20.7846
50	1156	NIU Jing, ZHNAG Lei, ZHANG Siping, LIU Shaodong, MA Huijuan, ZHAO Xinhua	2016	Cotton Science	114.496	36.0683	Gossypium spp	Dicotyledons	Malvaceae	Woody	Bud stage	Mid period	Plant height	0.6	Medium stress	9d	Short-term coercion	3	3	107.33	18.5901	120	20.7846
50	1157	NIU Jing, ZHNAG Lei, ZHANG Siping, LIU Shaodong, MA Huijuan, ZHAO Xinhua	2016	Cotton Science	114.496	36.0683	Gossypium spp	Dicotyledons	Malvaceae	Woody	Bud stage	Mid period	Plant height	0.45	Heavy stress	9d	Short-term coercion	3	3	103.67	17.9562	120	20.7846
50	1158	NIU Jing, ZHNAG Lei, ZHANG Siping, LIU Shaodong, MA Huijuan, ZHAO Xinhua	2016	Cotton Science	114.496	36.0683	Gossypium spp	Dicotyledons	Malvaceae	Woody	Bud stage	Mid period	Yield	0.6	Medium stress	3d	Short-term coercion	3	3	1791.57	310.309	1688.28	292.419
50	1159	NIU Jing, ZHNAG Lei, ZHANG Siping, LIU Shaodong, MA Huijuan, ZHAO Xinhua	2016	Cotton Science	114.496	36.0683	Gossypium spp	Dicotyledons	Malvaceae	Woody	Bud stage	Mid period	Yield	0.45	Heavy stress	3d	Short-term coercion	3	3	1720.79	298.05	1688.28	292.419
50	1160	NIU Jing, ZHNAG Lei, ZHANG Siping, LIU Shaodong, MA Huijuan, ZHAO Xinhua	2016	Cotton Science	114.496	36.0683	Gossypium spp	Dicotyledons	Malvaceae	Woody	Bud stage	Mid period	Yield	0.6	Medium stress	6d	Short-term coercion	3	3	1886.12	326.686	1688.28	292.419
50	1161	NIU Jing, ZHNAG Lei, ZHANG Siping, LIU Shaodong, MA Huijuan, ZHAO Xinhua	2016	Cotton Science	114.496	36.0683	Gossypium spp	Dicotyledons	Malvaceae	Woody	Bud stage	Mid period	Yield	0.45	Heavy stress	6d	Short-term coercion	3	3	2093.03	362.523	1688.28	292.419
50	1162	NIU Jing, ZHNAG Lei, ZHANG Siping, LIU Shaodong, MA Huijuan, ZHAO Xinhua	2016	Cotton Science	114.496	36.0683	Gossypium spp	Dicotyledons	Malvaceae	Woody	Bud stage	Mid period	Yield	0.6	Medium stress	9d	Short-term coercion	3	3	1374.29	238.034	1688.28	292.419
50	1163	NIU Jing, ZHNAG Lei, ZHANG Siping, LIU Shaodong, MA Huijuan, ZHAO Xinhua	2016	Cotton Science	114.496	36.0683	Gossypium spp	Dicotyledons	Malvaceae	Woody	Bud stage	Mid period	Yield	0.45	Heavy stress	9d	Short-term coercion	3	3	990.33	171.53	1688.28	292.419
50	1164	NIU Jing, ZHNAG Lei, ZHANG Siping, LIU Shaodong, MA Huijuan, ZHAO Xinhua	2016	Cotton Science	114.496	36.0683	Gossypium spp	Dicotyledons	Malvaceae	Woody	Bud stage	Mid period	Yield	0.6	Medium stress	3d	Short-term coercion	3	3	1722.27	298.306	1681.02	291.161
50	1165	NIU Jing, ZHNAG Lei, ZHANG Siping, LIU Shaodong, MA Huijuan, ZHAO Xinhua	2016	Cotton Science	114.496	36.0683	Gossypium spp	Dicotyledons	Malvaceae	Woody	Bud stage	Mid period	Yield	0.45	Heavy stress	3d	Short-term coercion	3	3	1886.61	326.77	1681.02	291.161
50	1166	NIU Jing, ZHNAG Lei, ZHANG Siping, LIU Shaodong, MA Huijuan, ZHAO Xinhua	2016	Cotton Science	114.496	36.0683	Gossypium spp	Dicotyledons	Malvaceae	Woody	Bud stage	Mid period	Yield	0.6	Medium stress	6d	Short-term coercion	3	3	2071.58	358.808	1681.02	291.161
50	1167	NIU Jing, ZHNAG Lei, ZHANG Siping, LIU Shaodong, MA Huijuan, ZHAO Xinhua	2016	Cotton Science	114.496	36.0683	Gossypium spp	Dicotyledons	Malvaceae	Woody	Bud stage	Mid period	Yield	0.45	Heavy stress	6d	Short-term coercion	3	3	1666.5	288.646	1681.02	291.161
50	1168	NIU Jing, ZHNAG Lei, ZHANG Siping, LIU Shaodong, MA Huijuan, ZHAO Xinhua	2016	Cotton Science	114.496	36.0683	Gossypium spp	Dicotyledons	Malvaceae	Woody	Bud stage	Mid period	Yield	0.6	Medium stress	9d	Short-term coercion	3	3	1223.48	211.913	1681.02	291.161
50	1169	NIU Jing, ZHNAG Lei, ZHANG Siping, LIU Shaodong, MA Huijuan, ZHAO Xinhua	2016	Cotton Science	114.496	36.0683	Gossypium spp	Dicotyledons	Malvaceae	Woody	Bud stage	Mid period	Yield	0.45	Heavy stress	9d	Short-term coercion	3	3	753.06	130.434	1681.02	291.161
50	1170	NIU Jing, ZHNAG Lei, ZHANG Siping, LIU Shaodong, MA Huijuan, ZHAO Xinhua	2016	Cotton Science	114.496	36.0683	Gossypium spp	Dicotyledons	Malvaceae	Woody	Bud stage	Mid period	Yield	0.6	Medium stress	3d	Short-term coercion	3	3	2243.41	388.57	2213.53	383.395
50	1171	NIU Jing, ZHNAG Lei, ZHANG Siping, LIU Shaodong, MA Huijuan, ZHAO Xinhua	2016	Cotton Science	114.496	36.0683	Gossypium spp	Dicotyledons	Malvaceae	Woody	Bud stage	Mid period	Yield	0.45	Heavy stress	3d	Short-term coercion	3	3	2410.49	417.509	2213.53	383.395
50	1172	NIU Jing, ZHNAG Lei, ZHANG Siping, LIU Shaodong, MA Huijuan, ZHAO Xinhua	2016	Cotton Science	114.496	36.0683	Gossypium spp	Dicotyledons	Malvaceae	Woody	Bud stage	Mid period	Yield	0.6	Medium stress	6d	Short-term coercion	3	3	2456.14	425.416	2213.53	383.395
50	1173	NIU Jing, ZHNAG Lei, ZHANG Siping, LIU Shaodong, MA Huijuan, ZHAO Xinhua	2016	Cotton Science	114.496	36.0683	Gossypium spp	Dicotyledons	Malvaceae	Woody	Bud stage	Mid period	Yield	0.45	Heavy stress	6d	Short-term coercion	3	3	2501.99	433.357	2213.53	383.395
50	1174	NIU Jing, ZHNAG Lei, ZHANG Siping, LIU Shaodong, MA Huijuan, ZHAO Xinhua	2016	Cotton Science	114.496	36.0683	Gossypium spp	Dicotyledons	Malvaceae	Woody	Bud stage	Mid period	Yield	0.6	Medium stress	9d	Short-term coercion	3	3	1581.94	274	2213.53	383.395
50	1175	NIU Jing, ZHNAG Lei, ZHANG Siping, LIU Shaodong, MA Huijuan, ZHAO Xinhua	2016	Cotton Science	114.496	36.0683	Gossypium spp	Dicotyledons	Malvaceae	Woody	Bud stage	Mid period	Yield	0.45	Heavy stress	9d	Short-term coercion	3	3	1100.15	190.552	2213.53	383.395
50	1176	NIU Jing, ZHNAG Lei, ZHANG Siping, LIU Shaodong, MA Huijuan, ZHAO Xinhua	2016	Cotton Science	114.496	36.0683	Gossypium spp	Dicotyledons	Malvaceae	Woody	Bud stage	Mid period	Yield	0.6	Medium stress	3d	Short-term coercion	3	3	2224.94	385.371	2064.82	357.637
50	1177	NIU Jing, ZHNAG Lei, ZHANG Siping, LIU Shaodong, MA Huijuan, ZHAO Xinhua	2016	Cotton Science	114.496	36.0683	Gossypium spp	Dicotyledons	Malvaceae	Woody	Bud stage	Mid period	Yield	0.45	Heavy stress	3d	Short-term coercion	3	3	2363.65	409.396	2064.82	357.637
50	1178	NIU Jing, ZHNAG Lei, ZHANG Siping, LIU Shaodong, MA Huijuan, ZHAO Xinhua	2016	Cotton Science	114.496	36.0683	Gossypium spp	Dicotyledons	Malvaceae	Woody	Bud stage	Mid period	Yield	0.6	Medium stress	6d	Short-term coercion	3	3	2427.26	420.414	2064.82	357.637
50	1179	NIU Jing, ZHNAG Lei, ZHANG Siping, LIU Shaodong, MA Huijuan, ZHAO Xinhua	2016	Cotton Science	114.496	36.0683	Gossypium spp	Dicotyledons	Malvaceae	Woody	Bud stage	Mid period	Yield	0.45	Heavy stress	6d	Short-term coercion	3	3	1854.88	321.275	2064.82	357.637
50	1180	NIU Jing, ZHNAG Lei, ZHANG Siping, LIU Shaodong, MA Huijuan, ZHAO Xinhua	2016	Cotton Science	114.496	36.0683	Gossypium spp	Dicotyledons	Malvaceae	Woody	Bud stage	Mid period	Yield	0.6	Medium stress	9d	Short-term coercion	3	3	1207.66	209.173	2064.82	357.637
50	1181	NIU Jing, ZHNAG Lei, ZHANG Siping, LIU Shaodong, MA Huijuan, ZHAO Xinhua	2016	Cotton Science	114.496	36.0683	Gossypium spp	Dicotyledons	Malvaceae	Woody	Bud stage	Mid period	Yield	0.45	Heavy stress	9d	Short-term coercion	3	3	1131.14	195.919	2064.82	357.637
51	1182	CUI Jiaxin, NING Huifeng, SONG Ni, ZHANG Yingyin, LIU Xiaofei, SHEN Xiaojun	2019	Journal of Irrigation and Drainage	113.927	35.3252	Triticum aestivum L.	Monocotyledon	Graminae	Herbaceous	Tasseling stage	Mid period	Proline	0.7	Mild stress	15d	Short-term coercion	3	3	39.52	6.84506	55.3	9.57824
51	1183	CUI Jiaxin, NING Huifeng, SONG Ni, ZHANG Yingyin, LIU Xiaofei, SHEN Xiaojun	2019	Journal of Irrigation and Drainage	113.927	35.3252	Triticum aestivum L.	Monocotyledon	Graminae	Herbaceous	Tasseling stage	Mid period	Proline	0.6	Medium stress	15d	Short-term coercion	3	3	48.653	8.42695	55.3	9.57824
51	1184	CUI Jiaxin, NING Huifeng, SONG Ni, ZHANG Yingyin, LIU Xiaofei, SHEN Xiaojun	2019	Journal of Irrigation and Drainage	113.927	35.3252	Triticum aestivum L.	Monocotyledon	Graminae	Herbaceous	Tasseling stage	Mid period	Soluble sugar	0.7	Mild stress	15d	Short-term coercion	3	3	0.32	0.0554256	0.23	0.0398372
51	1185	CUI Jiaxin, NING Huifeng, SONG Ni, ZHANG Yingyin, LIU Xiaofei, SHEN Xiaojun	2019	Journal of Irrigation and Drainage	113.927	35.3252	Triticum aestivum L.	Monocotyledon	Graminae	Herbaceous	Tasseling stage	Mid period	Soluble sugar	0.6	Medium stress	15d	Short-term coercion	3	3	0.67	0.116047	0.23	0.0398372
51	1186	CUI Jiaxin, NING Huifeng, SONG Ni, ZHANG Yingyin, LIU Xiaofei, SHEN Xiaojun	2019	Journal of Irrigation and Drainage	113.927	35.3252	Triticum aestivum L.	Monocotyledon	Graminae	Herbaceous	Tasseling stage	Mid period	chlorophyll content	0.7	Mild stress	15d	Short-term coercion	3	3	3.32	0.575041	2.04	0.353338
51	1187	CUI Jiaxin, NING Huifeng, SONG Ni, ZHANG Yingyin, LIU Xiaofei, SHEN Xiaojun	2019	Journal of Irrigation and Drainage	113.927	35.3252	Triticum aestivum L.	Monocotyledon	Graminae	Herbaceous	Tasseling stage	Mid period	chlorophyll content	0.6	Medium stress	15d	Short-term coercion	3	3	2.79	0.483242	2.04	0.353338
51	1188	CUI Jiaxin, NING Huifeng, SONG Ni, ZHANG Yingyin, LIU Xiaofei, SHEN Xiaojun	2019	Journal of Irrigation and Drainage	113.927	35.3252	Triticum aestivum L.	Monocotyledon	Graminae	Herbaceous	Tasseling stage	Mid period	MDA	0.7	Mild stress	15d	Short-term coercion	3	3	10.67	1.8481	9.94	1.72166
51	1189	CUI Jiaxin, NING Huifeng, SONG Ni, ZHANG Yingyin, LIU Xiaofei, SHEN Xiaojun	2019	Journal of Irrigation and Drainage	113.927	35.3252	Triticum aestivum L.	Monocotyledon	Graminae	Herbaceous	Tasseling stage	Mid period	MDA	0.6	Medium stress	15d	Short-term coercion	3	3	13.23	2.2915	9.94	1.72166
51	1190	CUI Jiaxin, NING Huifeng, SONG Ni, ZHANG Yingyin, LIU Xiaofei, SHEN Xiaojun	2019	Journal of Irrigation and Drainage	113.927	35.3252	Triticum aestivum L.	Monocotyledon	Graminae	Herbaceous	Tasseling stage	Mid period	Yield	0.7	Mild stress	15d	Short-term coercion	3	3	7575.8	1312.17	7917.5	1371.35
51	1191	CUI Jiaxin, NING Huifeng, SONG Ni, ZHANG Yingyin, LIU Xiaofei, SHEN Xiaojun	2019	Journal of Irrigation and Drainage	113.927	35.3252	Triticum aestivum L.	Monocotyledon	Graminae	Herbaceous	Tasseling stage	Mid period	Yield	0.6	Medium stress	15d	Short-term coercion	3	3	6839	1184.55	7917.5	1371.35
51	1192	CUI Jiaxin, NING Huifeng, SONG Ni, ZHANG Yingyin, LIU Xiaofei, SHEN Xiaojun	2019	Journal of Irrigation and Drainage	113.927	35.3252	Triticum aestivum L.	Monocotyledon	Graminae	Herbaceous	Tasseling stage	Mid period	WUE	0.7	Mild stress	15d	Short-term coercion	3	3	1.75	0.303109	1.56	0.2702
51	1193	CUI Jiaxin, NING Huifeng, SONG Ni, ZHANG Yingyin, LIU Xiaofei, SHEN Xiaojun	2019	Journal of Irrigation and Drainage	113.927	35.3252	Triticum aestivum L.	Monocotyledon	Graminae	Herbaceous	Tasseling stage	Mid period	WUE	0.6	Medium stress	15d	Short-term coercion	3	3	1.46	0.252879	1.56	0.2702
52	1194	ZHANG Cuicui, DENG Xiping, CHEN Wei	2011	Journal of Northwest A & F University(Natural Science Edition)	108.079	34.2916	Triticum aestivum L.	Monocotyledon	Graminae	Herbaceous	Jointing stage	Preceding period	Yield	0.6	Medium stress	15d	Short-term coercion	3	3	29.03	1.5242	29.46	0.883346
52	1195	ZHANG Cuicui, DENG Xiping, CHEN Wei	2011	Journal of Northwest A & F University(Natural Science Edition)	108.079	34.2916	Triticum aestivum L.	Monocotyledon	Graminae	Herbaceous	Jointing stage	Preceding period	Yield	0.5	Medium stress	15d	Short-term coercion	3	3	29.42	1.36832	29.46	0.883346
52	1196	ZHANG Cuicui, DENG Xiping, CHEN Wei	2011	Journal of Northwest A & F University(Natural Science Edition)	108.079	34.2916	Triticum aestivum L.	Monocotyledon	Graminae	Herbaceous	Period of grouting	Mid period	Yield	0.6	Medium stress	15d	Short-term coercion	3	3	22.54	1.31636	29.46	0.883346
52	1197	ZHANG Cuicui, DENG Xiping, CHEN Wei	2011	Journal of Northwest A & F University(Natural Science Edition)	108.079	34.2916	Triticum aestivum L.	Monocotyledon	Graminae	Herbaceous	Period of grouting	Mid period	Yield	0.5	Medium stress	15d	Short-term coercion	3	3	24.72	2.40755	29.46	0.883346
52	1198	ZHANG Cuicui, DENG Xiping, CHEN Wei	2011	Journal of Northwest A & F University(Natural Science Edition)	108.079	34.2916	Triticum aestivum L.	Monocotyledon	Graminae	Herbaceous	Jointing stage	Preceding period	Yield	0.6	Medium stress	15d	Short-term coercion	3	3	26.1	1.10851	27.14	1.14315
52	1199	ZHANG Cuicui, DENG Xiping, CHEN Wei	2011	Journal of Northwest A & F University(Natural Science Edition)	108.079	34.2916	Triticum aestivum L.	Monocotyledon	Graminae	Herbaceous	Jointing stage	Preceding period	Yield	0.5	Medium stress	15d	Short-term coercion	3	3	27.16	2.89252	27.14	1.14315
52	1200	ZHANG Cuicui, DENG Xiping, CHEN Wei	2011	Journal of Northwest A & F University(Natural Science Edition)	108.079	34.2916	Triticum aestivum L.	Monocotyledon	Graminae	Herbaceous	Period of grouting	Mid period	Yield	0.6	Medium stress	15d	Short-term coercion	3	3	19.56	0.900666	27.14	1.14315
52	1201	ZHANG Cuicui, DENG Xiping, CHEN Wei	2011	Journal of Northwest A & F University(Natural Science Edition)	108.079	34.2916	Triticum aestivum L.	Monocotyledon	Graminae	Herbaceous	Period of grouting	Mid period	Yield	0.5	Medium stress	15d	Short-term coercion	3	3	23.6	0.866025	27.14	1.14315
52	1202	ZHANG Cuicui, DENG Xiping, CHEN Wei	2011	Journal of Northwest A & F University(Natural Science Edition)	108.079	34.2916	Triticum aestivum L.	Monocotyledon	Graminae	Herbaceous	Jointing stage	Preceding period	Yield	0.6	Medium stress	15d	Short-term coercion	3	3	18.7	0.034641	24.92	1.29904
52	1203	ZHANG Cuicui, DENG Xiping, CHEN Wei	2011	Journal of Northwest A & F University(Natural Science Edition)	108.079	34.2916	Triticum aestivum L.	Monocotyledon	Graminae	Herbaceous	Jointing stage	Preceding period	Yield	0.5	Medium stress	15d	Short-term coercion	3	3	22.4	0.848705	24.92	1.29904
52	1204	ZHANG Cuicui, DENG Xiping, CHEN Wei	2011	Journal of Northwest A & F University(Natural Science Edition)	108.079	34.2916	Triticum aestivum L.	Monocotyledon	Graminae	Herbaceous	Period of grouting	Mid period	Yield	0.6	Medium stress	15d	Short-term coercion	3	3	16.86	0.710141	24.92	1.29904
52	1205	ZHANG Cuicui, DENG Xiping, CHEN Wei	2011	Journal of Northwest A & F University(Natural Science Edition)	108.079	34.2916	Triticum aestivum L.	Monocotyledon	Graminae	Herbaceous	Period of grouting	Mid period	Yield	0.5	Medium stress	15d	Short-term coercion	3	3	18.69	0.381051	24.92	1.29904
52	1206	ZHANG Cuicui, DENG Xiping, CHEN Wei	2011	Journal of Northwest A & F University(Natural Science Edition)	108.079	34.2916	Triticum aestivum L.	Monocotyledon	Graminae	Herbaceous	Jointing stage	Preceding period	Pn	0.6	Medium stress	15d	Short-term coercion	3	3	10.6322	1.32724	11.2069	1.99086
52	1207	ZHANG Cuicui, DENG Xiping, CHEN Wei	2011	Journal of Northwest A & F University(Natural Science Edition)	108.079	34.2916	Triticum aestivum L.	Monocotyledon	Graminae	Herbaceous	Jointing stage	Preceding period	Pn	0.5	Medium stress	15d	Short-term coercion	3	3	9.8659	1.99086	11.2069	1.99086
52	1208	ZHANG Cuicui, DENG Xiping, CHEN Wei	2011	Journal of Northwest A & F University(Natural Science Edition)	108.079	34.2916	Triticum aestivum L.	Monocotyledon	Graminae	Herbaceous	Period of grouting	Mid period	Pn	0.6	Medium stress	15d	Short-term coercion	3	3	9.09962	1.99086	11.2069	1.99086
52	1209	ZHANG Cuicui, DENG Xiping, CHEN Wei	2011	Journal of Northwest A & F University(Natural Science Edition)	108.079	34.2916	Triticum aestivum L.	Monocotyledon	Graminae	Herbaceous	Period of grouting	Mid period	Pn	0.5	Medium stress	15d	Short-term coercion	3	3	7.56705	2.65448	11.2069	1.99086
52	1210	ZHANG Cuicui, DENG Xiping, CHEN Wei	2011	Journal of Northwest A & F University(Natural Science Edition)	108.079	34.2916	Triticum aestivum L.	Monocotyledon	Graminae	Herbaceous	Jointing stage	Preceding period	Pn	0.6	Medium stress	15d	Short-term coercion	3	3	11.0153	1.65905	12.1648	2.32267
52	1211	ZHANG Cuicui, DENG Xiping, CHEN Wei	2011	Journal of Northwest A & F University(Natural Science Edition)	108.079	34.2916	Triticum aestivum L.	Monocotyledon	Graminae	Herbaceous	Jointing stage	Preceding period	Pn	0.5	Medium stress	15d	Short-term coercion	3	3	9.96169	2.98629	12.1648	2.32267
52	1212	ZHANG Cuicui, DENG Xiping, CHEN Wei	2011	Journal of Northwest A & F University(Natural Science Edition)	108.079	34.2916	Triticum aestivum L.	Monocotyledon	Graminae	Herbaceous	Period of grouting	Mid period	Pn	0.6	Medium stress	15d	Short-term coercion	3	3	9.57854	1.99086	12.1648	2.32267
52	1213	ZHANG Cuicui, DENG Xiping, CHEN Wei	2011	Journal of Northwest A & F University(Natural Science Edition)	108.079	34.2916	Triticum aestivum L.	Monocotyledon	Graminae	Herbaceous	Period of grouting	Mid period	Pn	0.5	Medium stress	15d	Short-term coercion	3	3	7.08812	0.995431	12.1648	2.32267
52	1214	ZHANG Cuicui, DENG Xiping, CHEN Wei	2011	Journal of Northwest A & F University(Natural Science Edition)	108.079	34.2916	Triticum aestivum L.	Monocotyledon	Graminae	Herbaceous	Jointing stage	Preceding period	Pn	0.6	Medium stress	15d	Short-term coercion	3	3	9.00383	2.98629	10.1533	1.99086
52	1215	ZHANG Cuicui, DENG Xiping, CHEN Wei	2011	Journal of Northwest A & F University(Natural Science Edition)	108.079	34.2916	Triticum aestivum L.	Monocotyledon	Graminae	Herbaceous	Jointing stage	Preceding period	Pn	0.5	Medium stress	15d	Short-term coercion	3	3	8.33333	2.65448	10.1533	1.99086
52	1216	ZHANG Cuicui, DENG Xiping, CHEN Wei	2011	Journal of Northwest A & F University(Natural Science Edition)	108.079	34.2916	Triticum aestivum L.	Monocotyledon	Graminae	Herbaceous	Period of grouting	Mid period	Pn	0.6	Medium stress	15d	Short-term coercion	3	3	6.03448	0.995431	10.1533	1.99086
52	1217	ZHANG Cuicui, DENG Xiping, CHEN Wei	2011	Journal of Northwest A & F University(Natural Science Edition)	108.079	34.2916	Triticum aestivum L.	Monocotyledon	Graminae	Herbaceous	Period of grouting	Mid period	Pn	0.5	Medium stress	15d	Short-term coercion	3	3	3.06513	1.32724	10.1533	1.99086
53	1218	YUAN Yonghui, DENG Xiping	2004	Acta Botanica Boreali-Occidentalia Sinica	108.082	34.2803	Triticum aestivum L.	Monocotyledon	Graminae	Herbaceous	Jointing stage	Preceding period	Yield	0.55	Medium stress	15d	Short-term coercion	3	3	11.3	2.75396	12.96	3.06573
53	1219	YUAN Yonghui, DENG Xiping	2004	Acta Botanica Boreali-Occidentalia Sinica	108.082	34.2803	Triticum aestivum L.	Monocotyledon	Graminae	Herbaceous	Period of grouting	Mid period	Yield	0.55	Medium stress	15d	Short-term coercion	3	3	10.14	3.84515	12.96	3.06573
53	1220	YUAN Yonghui, DENG Xiping	2004	Acta Botanica Boreali-Occidentalia Sinica	108.082	34.2803	Triticum aestivum L.	Monocotyledon	Graminae	Herbaceous	Jointing stage	Preceding period	Yield	0.55	Medium stress	15d	Short-term coercion	3	3	13.31	2.68468	18.23	1.83597
53	1221	YUAN Yonghui, DENG Xiping	2004	Acta Botanica Boreali-Occidentalia Sinica	108.082	34.2803	Triticum aestivum L.	Monocotyledon	Graminae	Herbaceous	Period of grouting	Mid period	Yield	0.55	Medium stress	15d	Short-term coercion	3	3	18.04	1.55885	18.23	1.83597
53	1222	YUAN Yonghui, DENG Xiping	2004	Acta Botanica Boreali-Occidentalia Sinica	108.082	34.2803	Triticum aestivum L.	Monocotyledon	Graminae	Herbaceous	Jointing stage	Preceding period	Yield	0.55	Medium stress	15d	Short-term coercion	3	3	7.71	1.29904	10.41	0.571577
53	1223	YUAN Yonghui, DENG Xiping	2004	Acta Botanica Boreali-Occidentalia Sinica	108.082	34.2803	Triticum aestivum L.	Monocotyledon	Graminae	Herbaceous	Period of grouting	Mid period	Yield	0.55	Medium stress	15d	Short-term coercion	3	3	9.44	2.37291	10.41	0.571577
53	1224	YUAN Yonghui, DENG Xiping	2004	Acta Botanica Boreali-Occidentalia Sinica	108.082	34.2803	Triticum aestivum L.	Monocotyledon	Graminae	Herbaceous	Jointing stage	Preceding period	Yield	0.55	Medium stress	15d	Short-term coercion	3	3	7.57	0.519615	9.16	0.900666
53	1225	YUAN Yonghui, DENG Xiping	2004	Acta Botanica Boreali-Occidentalia Sinica	108.082	34.2803	Triticum aestivum L.	Monocotyledon	Graminae	Herbaceous	Period of grouting	Mid period	Yield	0.55	Medium stress	15d	Short-term coercion	3	3	11.68	1.97454	9.16	0.900666
53	1226	YUAN Yonghui, DENG Xiping	2004	Acta Botanica Boreali-Occidentalia Sinica	108.082	34.2803	Triticum aestivum L.	Monocotyledon	Graminae	Herbaceous	Jointing stage	Preceding period	Yield	0.55	Medium stress	15d	Short-term coercion	3	3	10.63	1.07387	13.82	1.9399
53	1227	YUAN Yonghui, DENG Xiping	2004	Acta Botanica Boreali-Occidentalia Sinica	108.082	34.2803	Triticum aestivum L.	Monocotyledon	Graminae	Herbaceous	Period of grouting	Mid period	Yield	0.55	Medium stress	15d	Short-term coercion	3	3	15.718	1.03923	13.82	1.9399
53	1228	YUAN Yonghui, DENG Xiping	2004	Acta Botanica Boreali-Occidentalia Sinica	108.082	34.2803	Triticum aestivum L.	Monocotyledon	Graminae	Herbaceous	Jointing stage	Preceding period	WUE	0.55	Medium stress	15d	Short-term coercion	3	3	0.665314	0.172854	0.594726	0.0632392
53	1229	YUAN Yonghui, DENG Xiping	2004	Acta Botanica Boreali-Occidentalia Sinica	108.082	34.2803	Triticum aestivum L.	Monocotyledon	Graminae	Herbaceous	Period of grouting	Mid period	WUE	0.55	Medium stress	15d	Short-term coercion	3	3	0.565517	0.126478	0.594726	0.0632392
53	1230	YUAN Yonghui, DENG Xiping	2004	Acta Botanica Boreali-Occidentalia Sinica	108.082	34.2803	Triticum aestivum L.	Monocotyledon	Graminae	Herbaceous	Jointing stage	Preceding period	WUE	0.55	Medium stress	15d	Short-term coercion	3	3	0.776065	0.126478	0.793103	0.168638
53	1231	YUAN Yonghui, DENG Xiping	2004	Acta Botanica Boreali-Occidentalia Sinica	108.082	34.2803	Triticum aestivum L.	Monocotyledon	Graminae	Herbaceous	Period of grouting	Mid period	WUE	0.55	Medium stress	15d	Short-term coercion	3	3	0.744422	0.101183	0.793103	0.168638
53	1232	YUAN Yonghui, DENG Xiping	2004	Acta Botanica Boreali-Occidentalia Sinica	108.082	34.2803	Triticum aestivum L.	Monocotyledon	Graminae	Herbaceous	Jointing stage	Preceding period	WUE	0.55	Medium stress	15d	Short-term coercion	3	3	0.599594	0.160206	0.76146	0.0590232
53	1233	YUAN Yonghui, DENG Xiping	2004	Acta Botanica Boreali-Occidentalia Sinica	108.082	34.2803	Triticum aestivum L.	Monocotyledon	Graminae	Herbaceous	Period of grouting	Mid period	WUE	0.55	Medium stress	15d	Short-term coercion	3	3	0.588641	0.15599	0.76146	0.0590232
53	1234	YUAN Yonghui, DENG Xiping	2004	Acta Botanica Boreali-Occidentalia Sinica	108.082	34.2803	Triticum aestivum L.	Monocotyledon	Graminae	Herbaceous	Jointing stage	Preceding period	WUE	0.55	Medium stress	15d	Short-term coercion	3	3	0.580122	0.876917	0.711562	0.139126
53	1235	YUAN Yonghui, DENG Xiping	2004	Acta Botanica Boreali-Occidentalia Sinica	108.082	34.2803	Triticum aestivum L.	Monocotyledon	Graminae	Herbaceous	Period of grouting	Mid period	WUE	0.55	Medium stress	15d	Short-term coercion	3	3	0.807708	0.0309169	0.711562	0.139126
53	1236	YUAN Yonghui, DENG Xiping	2004	Acta Botanica Boreali-Occidentalia Sinica	108.082	34.2803	Triticum aestivum L.	Monocotyledon	Graminae	Herbaceous	Jointing stage	Preceding period	WUE	0.55	Medium stress	15d	Short-term coercion	3	3	0.859229	0.109615	0.789452	0.15599
53	1237	YUAN Yonghui, DENG Xiping	2004	Acta Botanica Boreali-Occidentalia Sinica	108.082	34.2803	Triticum aestivum L.	Monocotyledon	Graminae	Herbaceous	Period of grouting	Mid period	WUE	0.55	Medium stress	15d	Short-term coercion	3	3	0.944016	0.0632392	0.789452	0.15599
53	1238	YUAN Yonghui, DENG Xiping	2004	Acta Botanica Boreali-Occidentalia Sinica	108.082	34.2803	Triticum aestivum L.	Monocotyledon	Graminae	Herbaceous	Jointing stage	Preceding period	Gs	0.55	Medium stress	15d	Short-term coercion	3	3	193.716	21.1453	234.291	36.0714
53	1239	YUAN Yonghui, DENG Xiping	2004	Acta Botanica Boreali-Occidentalia Sinica	108.082	34.2803	Triticum aestivum L.	Monocotyledon	Graminae	Herbaceous	Period of grouting	Mid period	Gs	0.55	Medium stress	15d	Short-term coercion	3	3	154.937	44.7783	234.291	36.0714
53	1240	YUAN Yonghui, DENG Xiping	2004	Acta Botanica Boreali-Occidentalia Sinica	108.082	34.2803	Triticum aestivum L.	Monocotyledon	Graminae	Herbaceous	Jointing stage	Preceding period	Gs	0.55	Medium stress	15d	Short-term coercion	3	3	180.431	17.4138	128.725	50.9975
53	1241	YUAN Yonghui, DENG Xiping	2004	Acta Botanica Boreali-Occidentalia Sinica	108.082	34.2803	Triticum aestivum L.	Monocotyledon	Graminae	Herbaceous	Period of grouting	Mid period	Gs	0.55	Medium stress	15d	Short-term coercion	3	3	187.253	17.4138	128.725	50.9975
53	1242	YUAN Yonghui, DENG Xiping	2004	Acta Botanica Boreali-Occidentalia Sinica	108.082	34.2803	Triticum aestivum L.	Monocotyledon	Graminae	Herbaceous	Jointing stage	Preceding period	Gs	0.55	Medium stress	15d	Short-term coercion	3	3	203.052	31.0961	252.962	50.9975
53	1243	YUAN Yonghui, DENG Xiping	2004	Acta Botanica Boreali-Occidentalia Sinica	108.082	34.2803	Triticum aestivum L.	Monocotyledon	Graminae	Herbaceous	Period of grouting	Mid period	Gs	0.55	Medium stress	15d	Short-term coercion	3	3	157.81	34.8276	252.962	50.9975
53	1244	YUAN Yonghui, DENG Xiping	2004	Acta Botanica Boreali-Occidentalia Sinica	108.082	34.2803	Triticum aestivum L.	Monocotyledon	Graminae	Herbaceous	Jointing stage	Preceding period	Gs	0.55	Medium stress	15d	Short-term coercion	3	3	245.781	34.8276	212.388	34.8276
53	1245	YUAN Yonghui, DENG Xiping	2004	Acta Botanica Boreali-Occidentalia Sinica	108.082	34.2803	Triticum aestivum L.	Monocotyledon	Graminae	Herbaceous	Period of grouting	Mid period	Gs	0.55	Medium stress	15d	Short-term coercion	3	3	204.129	37.3153	212.388	34.8276
53	1246	YUAN Yonghui, DENG Xiping	2004	Acta Botanica Boreali-Occidentalia Sinica	108.082	34.2803	Triticum aestivum L.	Monocotyledon	Graminae	Herbaceous	Jointing stage	Preceding period	Gs	0.55	Medium stress	15d	Short-term coercion	3	3	214.901	16.17	267.684	38.5591
53	1247	YUAN Yonghui, DENG Xiping	2004	Acta Botanica Boreali-Occidentalia Sinica	108.082	34.2803	Triticum aestivum L.	Monocotyledon	Graminae	Herbaceous	Period of grouting	Mid period	Gs	0.55	Medium stress	15d	Short-term coercion	3	3	180.431	34.8276	267.684	38.5591
53	1248	YUAN Yonghui, DENG Xiping	2004	Acta Botanica Boreali-Occidentalia Sinica	108.082	34.2803	Triticum aestivum L.	Monocotyledon	Graminae	Herbaceous	Jointing stage	Preceding period	Ci	0.55	Medium stress	15d	Short-term coercion	3	3	165.929	36.7869	189.381	53.6476
53	1249	YUAN Yonghui, DENG Xiping	2004	Acta Botanica Boreali-Occidentalia Sinica	108.082	34.2803	Triticum aestivum L.	Monocotyledon	Graminae	Herbaceous	Period of grouting	Mid period	Ci	0.55	Medium stress	15d	Short-term coercion	3	3	123.009	16.8607	189.381	53.6476
53	1250	YUAN Yonghui, DENG Xiping	2004	Acta Botanica Boreali-Occidentalia Sinica	108.082	34.2803	Triticum aestivum L.	Monocotyledon	Graminae	Herbaceous	Jointing stage	Preceding period	Ci	0.55	Medium stress	15d	Short-term coercion	3	3	177.434	52.1148	126.991	59.7787
53	1251	YUAN Yonghui, DENG Xiping	2004	Acta Botanica Boreali-Occidentalia Sinica	108.082	34.2803	Triticum aestivum L.	Monocotyledon	Graminae	Herbaceous	Period of grouting	Mid period	Ci	0.55	Medium stress	15d	Short-term coercion	3	3	194.69	21.459	126.991	59.7787
53	1252	YUAN Yonghui, DENG Xiping	2004	Acta Botanica Boreali-Occidentalia Sinica	108.082	34.2803	Triticum aestivum L.	Monocotyledon	Graminae	Herbaceous	Jointing stage	Preceding period	Ci	0.55	Medium stress	15d	Short-term coercion	3	3	207.965	55.1804	222.124	6.13115
53	1253	YUAN Yonghui, DENG Xiping	2004	Acta Botanica Boreali-Occidentalia Sinica	108.082	34.2803	Triticum aestivum L.	Monocotyledon	Graminae	Herbaceous	Period of grouting	Mid period	Ci	0.55	Medium stress	15d	Short-term coercion	3	3	204.867	41.3853	222.124	6.13115
53	1254	YUAN Yonghui, DENG Xiping	2004	Acta Botanica Boreali-Occidentalia Sinica	108.082	34.2803	Triticum aestivum L.	Monocotyledon	Graminae	Herbaceous	Jointing stage	Preceding period	Ci	0.55	Medium stress	15d	Short-term coercion	3	3	194.69	53.6476	202.655	26.0574
53	1255	YUAN Yonghui, DENG Xiping	2004	Acta Botanica Boreali-Occidentalia Sinica	108.082	34.2803	Triticum aestivum L.	Monocotyledon	Graminae	Herbaceous	Period of grouting	Mid period	Ci	0.55	Medium stress	15d	Short-term coercion	3	3	237.611	38.3197	202.655	26.0574
53	1256	YUAN Yonghui, DENG Xiping	2004	Acta Botanica Boreali-Occidentalia Sinica	108.082	34.2803	Triticum aestivum L.	Monocotyledon	Graminae	Herbaceous	Jointing stage	Preceding period	Ci	0.55	Medium stress	15d	Short-term coercion	3	3	180.531	64.3771	204.425	26.0574
53	1257	YUAN Yonghui, DENG Xiping	2004	Acta Botanica Boreali-Occidentalia Sinica	108.082	34.2803	Triticum aestivum L.	Monocotyledon	Graminae	Herbaceous	Period of grouting	Mid period	Ci	0.55	Medium stress	15d	Short-term coercion	3	3	174.779	45.9836	204.425	26.0574
53	1258	YUAN Yonghui, DENG Xiping	2004	Acta Botanica Boreali-Occidentalia Sinica	108.082	34.2803	Triticum aestivum L.	Monocotyledon	Graminae	Herbaceous	Jointing stage	Preceding period	Pn	0.55	Medium stress	15d	Short-term coercion	3	3	20.948	3.6283	20.752	3.59435
53	1259	YUAN Yonghui, DENG Xiping	2004	Acta Botanica Boreali-Occidentalia Sinica	108.082	34.2803	Triticum aestivum L.	Monocotyledon	Graminae	Herbaceous	Period of grouting	Mid period	Pn	0.55	Medium stress	15d	Short-term coercion	3	3	20.304	3.51676	20.752	3.59435
53	1260	YUAN Yonghui, DENG Xiping	2004	Acta Botanica Boreali-Occidentalia Sinica	108.082	34.2803	Triticum aestivum L.	Monocotyledon	Graminae	Herbaceous	Jointing stage	Preceding period	Pn	0.55	Medium stress	15d	Short-term coercion	3	3	18.68	3.23547	20.08	3.47796
53	1261	YUAN Yonghui, DENG Xiping	2004	Acta Botanica Boreali-Occidentalia Sinica	108.082	34.2803	Triticum aestivum L.	Monocotyledon	Graminae	Herbaceous	Period of grouting	Mid period	Pn	0.55	Medium stress	15d	Short-term coercion	3	3	16.804	2.91054	20.08	3.47796
53	1262	YUAN Yonghui, DENG Xiping	2004	Acta Botanica Boreali-Occidentalia Sinica	108.082	34.2803	Triticum aestivum L.	Monocotyledon	Graminae	Herbaceous	Jointing stage	Preceding period	Pn	0.55	Medium stress	15d	Short-term coercion	3	3	16.832	2.91539	18.736	3.24517
53	1263	YUAN Yonghui, DENG Xiping	2004	Acta Botanica Boreali-Occidentalia Sinica	108.082	34.2803	Triticum aestivum L.	Monocotyledon	Graminae	Herbaceous	Period of grouting	Mid period	Pn	0.55	Medium stress	15d	Short-term coercion	3	3	14.284	2.47406	18.736	3.24517
53	1264	YUAN Yonghui, DENG Xiping	2004	Acta Botanica Boreali-Occidentalia Sinica	108.082	34.2803	Triticum aestivum L.	Monocotyledon	Graminae	Herbaceous	Jointing stage	Preceding period	Pn	0.55	Medium stress	15d	Short-term coercion	3	3	20.36	3.52646	18.624	3.22577
53	1265	YUAN Yonghui, DENG Xiping	2004	Acta Botanica Boreali-Occidentalia Sinica	108.082	34.2803	Triticum aestivum L.	Monocotyledon	Graminae	Herbaceous	Period of grouting	Mid period	Pn	0.55	Medium stress	15d	Short-term coercion	3	3	13.948	2.41586	18.624	3.22577
53	1266	YUAN Yonghui, DENG Xiping	2004	Acta Botanica Boreali-Occidentalia Sinica	108.082	34.2803	Triticum aestivum L.	Monocotyledon	Graminae	Herbaceous	Jointing stage	Preceding period	Pn	0.55	Medium stress	15d	Short-term coercion	3	3	20.08	3.47796	21.648	3.74954
53	1267	YUAN Yonghui, DENG Xiping	2004	Acta Botanica Boreali-Occidentalia Sinica	108.082	34.2803	Triticum aestivum L.	Monocotyledon	Graminae	Herbaceous	Period of grouting	Mid period	Pn	0.55	Medium stress	15d	Short-term coercion	3	3	17.616	3.05118	21.648	3.74954
53	1268	YUAN Yonghui, DENG Xiping	2004	Acta Botanica Boreali-Occidentalia Sinica	108.082	34.2803	Triticum aestivum L.	Monocotyledon	Graminae	Herbaceous	Jointing stage	Preceding period	Tr	0.55	Medium stress	15d	Short-term coercion	3	3	3.20766	0.555583	4.47782	0.775582
53	1269	YUAN Yonghui, DENG Xiping	2004	Acta Botanica Boreali-Occidentalia Sinica	108.082	34.2803	Triticum aestivum L.	Monocotyledon	Graminae	Herbaceous	Period of grouting	Mid period	Tr	0.55	Medium stress	15d	Short-term coercion	3	3	2.2621	0.391807	4.47782	0.775582
53	1270	YUAN Yonghui, DENG Xiping	2004	Acta Botanica Boreali-Occidentalia Sinica	108.082	34.2803	Triticum aestivum L.	Monocotyledon	Graminae	Herbaceous	Jointing stage	Preceding period	Tr	0.55	Medium stress	15d	Short-term coercion	3	3	2.98891	0.517695	1.88105	0.325807
53	1271	YUAN Yonghui, DENG Xiping	2004	Acta Botanica Boreali-Occidentalia Sinica	108.082	34.2803	Triticum aestivum L.	Monocotyledon	Graminae	Herbaceous	Period of grouting	Mid period	Tr	0.55	Medium stress	15d	Short-term coercion	3	3	3.02419	0.523806	1.88105	0.325807
53	1272	YUAN Yonghui, DENG Xiping	2004	Acta Botanica Boreali-Occidentalia Sinica	108.082	34.2803	Triticum aestivum L.	Monocotyledon	Graminae	Herbaceous	Jointing stage	Preceding period	Tr	0.55	Medium stress	15d	Short-term coercion	3	3	3.77218	0.65336	2.65726	0.460251
53	1273	YUAN Yonghui, DENG Xiping	2004	Acta Botanica Boreali-Occidentalia Sinica	108.082	34.2803	Triticum aestivum L.	Monocotyledon	Graminae	Herbaceous	Period of grouting	Mid period	Tr	0.55	Medium stress	15d	Short-term coercion	3	3	2.44556	0.423584	2.65726	0.460251
53	1274	YUAN Yonghui, DENG Xiping	2004	Acta Botanica Boreali-Occidentalia Sinica	108.082	34.2803	Triticum aestivum L.	Monocotyledon	Graminae	Herbaceous	Jointing stage	Preceding period	Tr	0.55	Medium stress	15d	Short-term coercion	3	3	3.40524	0.589805	2.25504	0.390584
53	1275	YUAN Yonghui, DENG Xiping	2004	Acta Botanica Boreali-Occidentalia Sinica	108.082	34.2803	Triticum aestivum L.	Monocotyledon	Graminae	Herbaceous	Period of grouting	Mid period	Tr	0.55	Medium stress	15d	Short-term coercion	3	3	2.82661	0.489584	2.25504	0.390584
53	1276	YUAN Yonghui, DENG Xiping	2004	Acta Botanica Boreali-Occidentalia Sinica	108.082	34.2803	Triticum aestivum L.	Monocotyledon	Graminae	Herbaceous	Jointing stage	Preceding period	Tr	0.55	Medium stress	15d	Short-term coercion	3	3	3.39113	0.587361	2.71371	0.470028
53	1277	YUAN Yonghui, DENG Xiping	2004	Acta Botanica Boreali-Occidentalia Sinica	108.082	34.2803	Triticum aestivum L.	Monocotyledon	Graminae	Herbaceous	Period of grouting	Mid period	Tr	0.55	Medium stress	15d	Short-term coercion	3	3	3.49698	0.605694	2.71371	0.470028
54	1278	WANG Xiaoxue, LI Yue, ZHANG Bin, JIA Juqing, FENG Meiche, ZHANG Meijun, YANG Wude	2020	Acta Agrestia Sinica	112.59	37.43	Avena sativa L.	Monocotyledon	Graminae	Herbaceous	Seedling stage	Preceding period	Root length	0.55	Medium stress	14d	Short-term coercion	3	3	262.16	17.4937	306.52	14.7224
54	1279	WANG Xiaoxue, LI Yue, ZHANG Bin, JIA Juqing, FENG Meiche, ZHANG Meijun, YANG Wude	2020	Acta Agrestia Sinica	112.59	37.43	Avena sativa L.	Monocotyledon	Graminae	Herbaceous	Seedling stage	Preceding period	Root length	0.35	Heavy stress	14d	Short-term coercion	3	3	148.42	12.6093	306.52	14.7224
54	1280	WANG Xiaoxue, LI Yue, ZHANG Bin, JIA Juqing, FENG Meiche, ZHANG Meijun, YANG Wude	2020	Acta Agrestia Sinica	112.59	37.43	Avena sativa L.	Monocotyledon	Graminae	Herbaceous	Seedling stage	Preceding period	Root surface area	0.55	Medium stress	14d	Short-term coercion	3	3	57.9	3.48142	66.4	8.31384
54	1281	WANG Xiaoxue, LI Yue, ZHANG Bin, JIA Juqing, FENG Meiche, ZHANG Meijun, YANG Wude	2020	Acta Agrestia Sinica	112.59	37.43	Avena sativa L.	Monocotyledon	Graminae	Herbaceous	Seedling stage	Preceding period	Root surface area	0.35	Heavy stress	14d	Short-term coercion	3	3	30.91	3.4641	66.4	8.31384
54	1282	WANG Xiaoxue, LI Yue, ZHANG Bin, JIA Juqing, FENG Meiche, ZHANG Meijun, YANG Wude	2020	Acta Agrestia Sinica	112.59	37.43	Avena sativa L.	Monocotyledon	Graminae	Herbaceous	Seedling stage	Preceding period	root volume	0.55	Medium stress	14d	Short-term coercion	3	3	0.89	0.0866025	1.22	0.32909
54	1283	WANG Xiaoxue, LI Yue, ZHANG Bin, JIA Juqing, FENG Meiche, ZHANG Meijun, YANG Wude	2020	Acta Agrestia Sinica	112.59	37.43	Avena sativa L.	Monocotyledon	Graminae	Herbaceous	Seedling stage	Preceding period	root volume	0.35	Heavy stress	14d	Short-term coercion	3	3	0.46	0.103923	1.22	0.32909
54	1284	WANG Xiaoxue, LI Yue, ZHANG Bin, JIA Juqing, FENG Meiche, ZHANG Meijun, YANG Wude	2020	Acta Agrestia Sinica	112.59	37.43	Avena sativa L.	Monocotyledon	Graminae	Herbaceous	Seedling stage	Preceding period	Root vigor	0.55	Medium stress	14d	Short-term coercion	3	3	177.89	8.5808	204.312	11.4411
54	1285	WANG Xiaoxue, LI Yue, ZHANG Bin, JIA Juqing, FENG Meiche, ZHANG Meijun, YANG Wude	2020	Acta Agrestia Sinica	112.59	37.43	Avena sativa L.	Monocotyledon	Graminae	Herbaceous	Seedling stage	Preceding period	Root vigor	0.35	Heavy stress	14d	Short-term coercion	3	3	125.046	14.3013	204.312	11.4411
54	1286	WANG Xiaoxue, LI Yue, ZHANG Bin, JIA Juqing, FENG Meiche, ZHANG Meijun, YANG Wude	2020	Acta Agrestia Sinica	112.59	37.43	Avena sativa L.	Monocotyledon	Graminae	Herbaceous	Seedling stage	Preceding period	SOD	0.55	Medium stress	14d	Short-term coercion	3	3	510	15.5726	495.872	35.5944
54	1287	WANG Xiaoxue, LI Yue, ZHANG Bin, JIA Juqing, FENG Meiche, ZHANG Meijun, YANG Wude	2020	Acta Agrestia Sinica	112.59	37.43	Avena sativa L.	Monocotyledon	Graminae	Herbaceous	Seedling stage	Preceding period	SOD	0.35	Heavy stress	14d	Short-term coercion	3	3	553.028	15.5726	495.872	35.5944
54	1288	WANG Xiaoxue, LI Yue, ZHANG Bin, JIA Juqing, FENG Meiche, ZHANG Meijun, YANG Wude	2020	Acta Agrestia Sinica	112.59	37.43	Avena sativa L.	Monocotyledon	Graminae	Herbaceous	Seedling stage	Preceding period	CAT	0.55	Medium stress	14d	Short-term coercion	3	3	36.7812	11.2756	24.4123	12.4031
54	1289	WANG Xiaoxue, LI Yue, ZHANG Bin, JIA Juqing, FENG Meiche, ZHANG Meijun, YANG Wude	2020	Acta Agrestia Sinica	112.59	37.43	Avena sativa L.	Monocotyledon	Graminae	Herbaceous	Seedling stage	Preceding period	CAT	0.35	Heavy stress	14d	Short-term coercion	3	3	47.1971	6.76533	24.4123	12.4031
54	1290	WANG Xiaoxue, LI Yue, ZHANG Bin, JIA Juqing, FENG Meiche, ZHANG Meijun, YANG Wude	2020	Acta Agrestia Sinica	112.59	37.43	Avena sativa L.	Monocotyledon	Graminae	Herbaceous	Seedling stage	Preceding period	POD	0.55	Medium stress	14d	Short-term coercion	3	3	686.087	54.2207	532.174	108.441
54	1291	WANG Xiaoxue, LI Yue, ZHANG Bin, JIA Juqing, FENG Meiche, ZHANG Meijun, YANG Wude	2020	Acta Agrestia Sinica	112.59	37.43	Avena sativa L.	Monocotyledon	Graminae	Herbaceous	Seedling stage	Preceding period	POD	0.35	Heavy stress	14d	Short-term coercion	3	3	785.217	99.4047	532.174	108.441
54	1292	WANG Xiaoxue, LI Yue, ZHANG Bin, JIA Juqing, FENG Meiche, ZHANG Meijun, YANG Wude	2020	Acta Agrestia Sinica	112.59	37.43	Avena sativa L.	Monocotyledon	Graminae	Herbaceous	Seedling stage	Preceding period	MDA	0.55	Medium stress	14d	Short-term coercion	3	3	4.85769	0.420688	2.2315	0.52586
54	1293	WANG Xiaoxue, LI Yue, ZHANG Bin, JIA Juqing, FENG Meiche, ZHANG Meijun, YANG Wude	2020	Acta Agrestia Sinica	112.59	37.43	Avena sativa L.	Monocotyledon	Graminae	Herbaceous	Seedling stage	Preceding period	MDA	0.35	Heavy stress	14d	Short-term coercion	3	3	5.6167	0.736204	2.2315	0.52586
54	1294	WANG Xiaoxue, LI Yue, ZHANG Bin, JIA Juqing, FENG Meiche, ZHANG Meijun, YANG Wude	2020	Acta Agrestia Sinica	112.59	37.43	Avena sativa L.	Monocotyledon	Graminae	Herbaceous	Seedling stage	Preceding period	Proline	0.55	Medium stress	14d	Short-term coercion	3	3	122.697	20.2397	67.4157	18.6828
54	1295	WANG Xiaoxue, LI Yue, ZHANG Bin, JIA Juqing, FENG Meiche, ZHANG Meijun, YANG Wude	2020	Acta Agrestia Sinica	112.59	37.43	Avena sativa L.	Monocotyledon	Graminae	Herbaceous	Seedling stage	Preceding period	Proline	0.35	Heavy stress	14d	Short-term coercion	3	3	175.73	20.2397	67.4157	18.6828
54	1296	WANG Xiaoxue, LI Yue, ZHANG Bin, JIA Juqing, FENG Meiche, ZHANG Meijun, YANG Wude	2020	Acta Agrestia Sinica	112.59	37.43	Avena sativa L.	Monocotyledon	Graminae	Herbaceous	Seedling stage	Preceding period	Yield	0.55	Medium stress	14d	Short-term coercion	3	3	19.3829	3.77216	22.127	5.28103
54	1297	WANG Xiaoxue, LI Yue, ZHANG Bin, JIA Juqing, FENG Meiche, ZHANG Meijun, YANG Wude	2020	Acta Agrestia Sinica	112.59	37.43	Avena sativa L.	Monocotyledon	Graminae	Herbaceous	Seedling stage	Preceding period	Yield	0.35	Heavy stress	14d	Short-term coercion	3	3	7.66606	2.2633	22.127	5.28103
55	1298	XU Yinping, PAN Yongdong, REN Cheng, YAO Yuanhu, JIA Yanchun, CHEN Wenqing, HUO Kecang, BAO Qijun, ZHAO Feng, ZHANG Huayu	2019	Gansu Agricultural Science and Technology	103.695	36.1062	Hordeum vulgare L.	Monocotyledon	Graminae	Herbaceous	The flowering period	Mid period	Plant height	0.55	Medium stress	10d	Short-term coercion	3	3	66.31	11.4852	67.06	11.6151
55	1299	XU Yinping, PAN Yongdong, REN Cheng, YAO Yuanhu, JIA Yanchun, CHEN Wenqing, HUO Kecang, BAO Qijun, ZHAO Feng, ZHANG Huayu	2019	Gansu Agricultural Science and Technology	103.695	36.1062	Hordeum vulgare L.	Monocotyledon	Graminae	Herbaceous	The flowering period	Mid period	Plant height	0.35	Heavy stress	10d	Short-term coercion	3	3	62.74	10.8669	67.06	11.6151
55	1300	XU Yinping, PAN Yongdong, REN Cheng, YAO Yuanhu, JIA Yanchun, CHEN Wenqing, HUO Kecang, BAO Qijun, ZHAO Feng, ZHANG Huayu	2019	Gansu Agricultural Science and Technology	103.695	36.1062	Hordeum vulgare L.	Monocotyledon	Graminae	Herbaceous	The flowering period	Mid period	Plant height	0.15	Heavy stress	10d	Short-term coercion	3	3	59.66	10.3334	67.06	11.6151
55	1301	XU Yinping, PAN Yongdong, REN Cheng, YAO Yuanhu, JIA Yanchun, CHEN Wenqing, HUO Kecang, BAO Qijun, ZHAO Feng, ZHANG Huayu	2019	Gansu Agricultural Science and Technology	103.695	36.1062	Hordeum vulgare L.	Monocotyledon	Graminae	Herbaceous	The flowering period	Mid period	Yield	0.55	Medium stress	10d	Short-term coercion	3	3	0.69	0.119512	0.73	0.12644
55	1302	XU Yinping, PAN Yongdong, REN Cheng, YAO Yuanhu, JIA Yanchun, CHEN Wenqing, HUO Kecang, BAO Qijun, ZHAO Feng, ZHANG Huayu	2019	Gansu Agricultural Science and Technology	103.695	36.1062	Hordeum vulgare L.	Monocotyledon	Graminae	Herbaceous	The flowering period	Mid period	Yield	0.35	Heavy stress	10d	Short-term coercion	3	3	0.48	0.0831384	0.73	0.12644
55	1303	XU Yinping, PAN Yongdong, REN Cheng, YAO Yuanhu, JIA Yanchun, CHEN Wenqing, HUO Kecang, BAO Qijun, ZHAO Feng, ZHANG Huayu	2019	Gansu Agricultural Science and Technology	103.695	36.1062	Hordeum vulgare L.	Monocotyledon	Graminae	Herbaceous	The flowering period	Mid period	Yield	0.15	Heavy stress	10d	Short-term coercion	3	3	0.36	0.0623538	0.73	0.12644
55	1304	XU Yinping, PAN Yongdong, REN Cheng, YAO Yuanhu, JIA Yanchun, CHEN Wenqing, HUO Kecang, BAO Qijun, ZHAO Feng, ZHANG Huayu	2019	Gansu Agricultural Science and Technology	103.695	36.1062	Hordeum vulgare L.	Monocotyledon	Graminae	Herbaceous	The flowering period	Mid period	Carbohydrate	0.55	Medium stress	10d	Short-term coercion	3	3	12.1	2.09578	11.8	2.04382
55	1305	XU Yinping, PAN Yongdong, REN Cheng, YAO Yuanhu, JIA Yanchun, CHEN Wenqing, HUO Kecang, BAO Qijun, ZHAO Feng, ZHANG Huayu	2019	Gansu Agricultural Science and Technology	103.695	36.1062	Hordeum vulgare L.	Monocotyledon	Graminae	Herbaceous	The flowering period	Mid period	Carbohydrate	0.35	Heavy stress	10d	Short-term coercion	3	3	12.5	2.16506	11.8	2.04382
55	1306	XU Yinping, PAN Yongdong, REN Cheng, YAO Yuanhu, JIA Yanchun, CHEN Wenqing, HUO Kecang, BAO Qijun, ZHAO Feng, ZHANG Huayu	2019	Gansu Agricultural Science and Technology	103.695	36.1062	Hordeum vulgare L.	Monocotyledon	Graminae	Herbaceous	The flowering period	Mid period	Carbohydrate	0.15	Heavy stress	10d	Short-term coercion	3	3	12.7	2.1997	11.8	2.04382
55	1307	XU Yinping, PAN Yongdong, REN Cheng, YAO Yuanhu, JIA Yanchun, CHEN Wenqing, HUO Kecang, BAO Qijun, ZHAO Feng, ZHANG Huayu	2019	Gansu Agricultural Science and Technology	103.695	36.1062	Hordeum vulgare L.	Monocotyledon	Graminae	Herbaceous	The flowering period	Mid period	Starch	0.55	Medium stress	10d	Short-term coercion	3	3	52.8	9.14523	54.7	9.47432
55	1308	XU Yinping, PAN Yongdong, REN Cheng, YAO Yuanhu, JIA Yanchun, CHEN Wenqing, HUO Kecang, BAO Qijun, ZHAO Feng, ZHANG Huayu	2019	Gansu Agricultural Science and Technology	103.695	36.1062	Hordeum vulgare L.	Monocotyledon	Graminae	Herbaceous	The flowering period	Mid period	Starch	0.35	Heavy stress	10d	Short-term coercion	3	3	50.6	8.76418	54.7	9.47432
55	1309	XU Yinping, PAN Yongdong, REN Cheng, YAO Yuanhu, JIA Yanchun, CHEN Wenqing, HUO Kecang, BAO Qijun, ZHAO Feng, ZHANG Huayu	2019	Gansu Agricultural Science and Technology	103.695	36.1062	Hordeum vulgare L.	Monocotyledon	Graminae	Herbaceous	The flowering period	Mid period	Starch	0.15	Heavy stress	10d	Short-term coercion	3	3	50.1	8.67757	54.7	9.47432
56	1310	LI Lili, HOU Zhiyuan, LU Haibo, GONG Xuechen	2017	Journal of Hebei Agricultural University	114.93	40.6754	Setaria italica	Monocotyledon	Graminae	Herbaceous	Jointing stage	Preceding period	Pn	0.35	Heavy stress	21d	Medium-term stress	3	3	18.6091	3.98746	25.8993	7.31033
56	1311	LI Lili, HOU Zhiyuan, LU Haibo, GONG Xuechen	2017	Journal of Hebei Agricultural University	114.93	40.6754	Setaria italica	Monocotyledon	Graminae	Herbaceous	Jointing stage	Preceding period	Pn	0.35	Heavy stress	21d	Medium-term stress	3	3	26.9544	7.31033	27.0504	8.3072
56	1312	LI Lili, HOU Zhiyuan, LU Haibo, GONG Xuechen	2017	Journal of Hebei Agricultural University	114.93	40.6754	Setaria italica	Monocotyledon	Graminae	Herbaceous	Jointing stage	Preceding period	Gs	0.35	Heavy stress	21d	Medium-term stress	3	3	0.15814	0.0765325	0.209884	0.0342382
56	1313	LI Lili, HOU Zhiyuan, LU Haibo, GONG Xuechen	2017	Journal of Hebei Agricultural University	114.93	40.6754	Setaria italica	Monocotyledon	Graminae	Herbaceous	Jointing stage	Preceding period	Gs	0.35	Heavy stress	21d	Medium-term stress	3	3	0.210465	0.0322242	0.198837	0.0725045
56	1314	LI Lili, HOU Zhiyuan, LU Haibo, GONG Xuechen	2017	Journal of Hebei Agricultural University	114.93	40.6754	Setaria italica	Monocotyledon	Graminae	Herbaceous	Jointing stage	Preceding period	Tr	0.35	Heavy stress	21d	Medium-term stress	3	3	2.39776	1.24203	2.98039	2.8722
56	1315	LI Lili, HOU Zhiyuan, LU Haibo, GONG Xuechen	2017	Journal of Hebei Agricultural University	114.93	40.6754	Setaria italica	Monocotyledon	Graminae	Herbaceous	Jointing stage	Preceding period	Tr	0.35	Heavy stress	21d	Medium-term stress	3	3	5.64706	3.72609	6.20728	3.57084
56	1316	LI Lili, HOU Zhiyuan, LU Haibo, GONG Xuechen	2017	Journal of Hebei Agricultural University	114.93	40.6754	Setaria italica	Monocotyledon	Graminae	Herbaceous	Jointing stage	Preceding period	SPAD	0.35	Heavy stress	21d	Medium-term stress	3	3	10.4096	4.50751	11.759	7.17862
56	1317	LI Lili, HOU Zhiyuan, LU Haibo, GONG Xuechen	2017	Journal of Hebei Agricultural University	114.93	40.6754	Setaria italica	Monocotyledon	Graminae	Herbaceous	Jointing stage	Preceding period	SPAD	0.35	Heavy stress	21d	Medium-term stress	3	3	14.8434	7.34556	14.4096	11.5192
57	1318	GU Yanfang, DING Shenyan, GAO Zhiyin, XING Qian	2012	Strategic Study of CAE	114.559	35.0261	Triticum aestivum L.	Monocotyledon	Graminae	Herbaceous	Jointing stage	Preceding period	Yield	0.35	Heavy stress	10d	Short-term coercion	3	3	2.31	0.207846	3.57	0.190526
57	1319	GU Yanfang, DING Shenyan, GAO Zhiyin, XING Qian	2012	Strategic Study of CAE	114.559	35.0261	Triticum aestivum L.	Monocotyledon	Graminae	Herbaceous	Jointing stage	Preceding period	Yield	0.35	Heavy stress	20d	Short-term coercion	3	3	3.479	0.294449	3.57	0.190526
57	1320	GU Yanfang, DING Shenyan, GAO Zhiyin, XING Qian	2012	Strategic Study of CAE	114.559	35.0261	Triticum aestivum L.	Monocotyledon	Graminae	Herbaceous	Jointing stage	Preceding period	Yield	0.35	Heavy stress	30d	Medium-term stress	3	3	2.94	0.259808	3.57	0.190526
57	1321	GU Yanfang, DING Shenyan, GAO Zhiyin, XING Qian	2012	Strategic Study of CAE	114.559	35.0261	Triticum aestivum L.	Monocotyledon	Graminae	Herbaceous	Jointing stage	Preceding period	Yield	0.35	Heavy stress	10d	Short-term coercion	3	3	2.35	0.536936	3.46	0.900666
57	1322	GU Yanfang, DING Shenyan, GAO Zhiyin, XING Qian	2012	Strategic Study of CAE	114.559	35.0261	Triticum aestivum L.	Monocotyledon	Graminae	Herbaceous	Jointing stage	Preceding period	Yield	0.35	Heavy stress	20d	Short-term coercion	3	3	2.14	0.398372	3.46	0.900666
57	1323	GU Yanfang, DING Shenyan, GAO Zhiyin, XING Qian	2012	Strategic Study of CAE	114.559	35.0261	Triticum aestivum L.	Monocotyledon	Graminae	Herbaceous	Jointing stage	Preceding period	Yield	0.35	Heavy stress	30d	Medium-term stress	3	3	2.45	0.883346	3.46	0.900666
57	1324	GU Yanfang, DING Shenyan, GAO Zhiyin, XING Qian	2012	Strategic Study of CAE	114.559	35.0261	Triticum aestivum L.	Monocotyledon	Graminae	Herbaceous	Jointing stage	Preceding period	Dry matter	0.35	Heavy stress	10d	Short-term coercion	3	3	4.76265	0.824914	4.94942	0.857264
57	1325	GU Yanfang, DING Shenyan, GAO Zhiyin, XING Qian	2012	Strategic Study of CAE	114.559	35.0261	Triticum aestivum L.	Monocotyledon	Graminae	Herbaceous	Jointing stage	Preceding period	Dry matter	0.35	Heavy stress	20d	Short-term coercion	3	3	4.98054	0.862656	3.82879	0.663167
57	1326	GU Yanfang, DING Shenyan, GAO Zhiyin, XING Qian	2012	Strategic Study of CAE	114.559	35.0261	Triticum aestivum L.	Monocotyledon	Graminae	Herbaceous	Jointing stage	Preceding period	Dry matter	0.35	Heavy stress	30d	Medium-term stress	3	3	5.53125	0.958041	8.95312	1.55073
57	1327	GU Yanfang, DING Shenyan, GAO Zhiyin, XING Qian	2012	Strategic Study of CAE	114.559	35.0261	Triticum aestivum L.	Monocotyledon	Graminae	Herbaceous	Jointing stage	Preceding period	Dry matter	0.35	Heavy stress	10d	Short-term coercion	3	3	6.51562	1.12854	6.23438	1.07983
57	1328	GU Yanfang, DING Shenyan, GAO Zhiyin, XING Qian	2012	Strategic Study of CAE	114.559	35.0261	Triticum aestivum L.	Monocotyledon	Graminae	Herbaceous	Jointing stage	Preceding period	Dry matter	0.35	Heavy stress	20d	Short-term coercion	3	3	7.64062	1.3234	9.65625	1.67251
57	1329	GU Yanfang, DING Shenyan, GAO Zhiyin, XING Qian	2012	Strategic Study of CAE	114.559	35.0261	Triticum aestivum L.	Monocotyledon	Graminae	Herbaceous	Jointing stage	Preceding period	Dry matter	0.35	Heavy stress	30d	Medium-term stress	3	3	5.95312	1.03111	7.64062	1.3234
57	1330	GU Yanfang, DING Shenyan, GAO Zhiyin, XING Qian	2012	Strategic Study of CAE	114.559	35.0261	Triticum aestivum L.	Monocotyledon	Graminae	Herbaceous	Jointing stage	Preceding period	Soluble sugar	0.35	Heavy stress	20d	Short-term coercion	3	3	38.6364	6.69201	29.5455	5.11742
57	1331	GU Yanfang, DING Shenyan, GAO Zhiyin, XING Qian	2012	Strategic Study of CAE	114.559	35.0261	Triticum aestivum L.	Monocotyledon	Graminae	Herbaceous	Jointing stage	Preceding period	Soluble sugar	0.35	Heavy stress	30d	Medium-term stress	3	3	161.364	27.949	177.273	30.7045
57	1332	GU Yanfang, DING Shenyan, GAO Zhiyin, XING Qian	2012	Strategic Study of CAE	114.559	35.0261	Triticum aestivum L.	Monocotyledon	Graminae	Herbaceous	Jointing stage	Preceding period	Soluble sugar	0.35	Heavy stress	10d	Short-term coercion	3	3	180.682	31.295	189.773	32.8696
57	1333	GU Yanfang, DING Shenyan, GAO Zhiyin, XING Qian	2012	Strategic Study of CAE	114.559	35.0261	Triticum aestivum L.	Monocotyledon	Graminae	Herbaceous	Jointing stage	Preceding period	Soluble sugar	0.35	Heavy stress	20d	Short-term coercion	3	3	35.2273	6.10154	26.1364	4.52695
57	1334	GU Yanfang, DING Shenyan, GAO Zhiyin, XING Qian	2012	Strategic Study of CAE	114.559	35.0261	Triticum aestivum L.	Monocotyledon	Graminae	Herbaceous	Jointing stage	Preceding period	Soluble sugar	0.35	Heavy stress	30d	Medium-term stress	3	3	26.1364	4.52695	31.8182	5.51107
58	1335	ZHANG Hengyue, GUO Yi li, WANG Lei, WEI Wei, DING Shengyan	2009	Journal of Henan University （Natural Science）	114.319	34.8275	Glycine max (L.) Merr.	Dicotyledons	Leguminosae	Herbaceous	Seedling stage	Preceding period	Biomass	0.2	Heavy stress	7d	Short-term coercion	3	3	152.94	37.3084	165.36	30.4841
58	1336	ZHANG Hengyue, GUO Yi li, WANG Lei, WEI Wei, DING Shengyan	2009	Journal of Henan University （Natural Science）	114.319	34.8275	Glycine max (L.) Merr.	Dicotyledons	Leguminosae	Herbaceous	Seedling stage	Preceding period	Pn	0.2	Heavy stress	7d	Short-term coercion	3	3	26.2233	1.97478	27.2922	2.96218
58	1337	ZHANG Hengyue, GUO Yi li, WANG Lei, WEI Wei, DING Shengyan	2009	Journal of Henan University （Natural Science）	114.319	34.8275	Glycine max (L.) Merr.	Dicotyledons	Leguminosae	Herbaceous	Seedling stage	Preceding period	Tr	0.2	Heavy stress	7d	Short-term coercion	3	3	3.25984	0.306859	3.47244	0.736463
58	1338	ZHANG Hengyue, GUO Yi li, WANG Lei, WEI Wei, DING Shengyan	2009	Journal of Henan University （Natural Science）	114.319	34.8275	Glycine max (L.) Merr.	Dicotyledons	Leguminosae	Herbaceous	Seedling stage	Preceding period	Gs	0.2	Heavy stress	7d	Short-term coercion	3	3	0.878378	0.131074	0.943243	0.102987
58	1339	ZHANG Hengyue, GUO Yi li, WANG Lei, WEI Wei, DING Shengyan	2009	Journal of Henan University （Natural Science）	114.319	34.8275	Glycine max (L.) Merr.	Dicotyledons	Leguminosae	Herbaceous	Seedling stage	Preceding period	Ci	0.2	Heavy stress	7d	Short-term coercion	3	3	337.271	45.1533	340.53	16.9325
59	1340	JIANG Peng, QIN Meiou, CAI Fu, WEN Rihong, WENG Ying, YANG Feiyun, SUN Pei, FENG Ailin, FANG Yuan	2023	Journal of Arid Meteorology	121.176	41.1598	Zea mays L.	Monocotyledon	Graminae	Herbaceous	Jointing stage	Preceding period	Pn	0.35	Heavy stress	20d	Short-term coercion	3	3	12.575	2.17805	18.828	3.26111
59	1341	JIANG Peng, QIN Meiou, CAI Fu, WEN Rihong, WENG Ying, YANG Feiyun, SUN Pei, FENG Ailin, FANG Yuan	2023	Journal of Arid Meteorology	121.176	41.1598	Zea mays L.	Monocotyledon	Graminae	Herbaceous	Jointing stage	Preceding period	Tr	0.35	Heavy stress	20d	Short-term coercion	3	3	0.498	0.0862561	0.695	0.120378
60	1342	LI Jiajia, KONG Ke, WANG Shuji, PANG Guibin	2021	China Rural Water and Hydropower	114.611	36.6623	Solanum lycopersicum	Dicotyledons	Solanaceae	Herbaceous	The flowering period	Mid period	Tr	0.75	Mild stress	7d	Short-term coercion	3	3	6.88032	1.19171	7.30223	1.26478
60	1343	LI Jiajia, KONG Ke, WANG Shuji, PANG Guibin	2021	China Rural Water and Hydropower	114.611	36.6623	Solanum lycopersicum	Dicotyledons	Solanaceae	Herbaceous	The flowering period	Mid period	Tr	0.55	Medium stress	7d	Short-term coercion	3	3	6.36105	1.10177	7.30223	1.26478
60	1344	LI Jiajia, KONG Ke, WANG Shuji, PANG Guibin	2021	China Rural Water and Hydropower	114.611	36.6623	Solanum lycopersicum	Dicotyledons	Solanaceae	Herbaceous	The flowering period	Mid period	Tr	0.35	Heavy stress	7d	Short-term coercion	3	3	6.02028	1.04274	7.30223	1.26478
60	1345	LI Jiajia, KONG Ke, WANG Shuji, PANG Guibin	2021	China Rural Water and Hydropower	114.611	36.6623	Solanum lycopersicum	Dicotyledons	Solanaceae	Herbaceous	The flowering period	Mid period	Tr	0.75	Mild stress	14d	Short-term coercion	3	3	5.77688	1.00058	7.30223	1.26478
60	1346	LI Jiajia, KONG Ke, WANG Shuji, PANG Guibin	2021	China Rural Water and Hydropower	114.611	36.6623	Solanum lycopersicum	Dicotyledons	Solanaceae	Herbaceous	The flowering period	Mid period	Tr	0.55	Medium stress	14d	Short-term coercion	3	3	5.33874	0.924697	7.30223	1.26478
60	1347	LI Jiajia, KONG Ke, WANG Shuji, PANG Guibin	2021	China Rural Water and Hydropower	114.611	36.6623	Solanum lycopersicum	Dicotyledons	Solanaceae	Herbaceous	The flowering period	Mid period	Tr	0.35	Heavy stress	14d	Short-term coercion	3	3	4.77079	0.826325	7.30223	1.26478
60	1348	LI Jiajia, KONG Ke, WANG Shuji, PANG Guibin	2021	China Rural Water and Hydropower	114.611	36.6623	Solanum lycopersicum	Dicotyledons	Solanaceae	Herbaceous	The flowering period	Mid period	Tr	0.75	Mild stress	21d	Medium-term stress	3	3	3.48884	0.604285	7.30223	1.26478
60	1349	LI Jiajia, KONG Ke, WANG Shuji, PANG Guibin	2021	China Rural Water and Hydropower	114.611	36.6623	Solanum lycopersicum	Dicotyledons	Solanaceae	Herbaceous	The flowering period	Mid period	Tr	0.55	Medium stress	21d	Medium-term stress	3	3	2.74239	0.474996	7.30223	1.26478
60	1350	LI Jiajia, KONG Ke, WANG Shuji, PANG Guibin	2021	China Rural Water and Hydropower	114.611	36.6623	Solanum lycopersicum	Dicotyledons	Solanaceae	Herbaceous	The flowering period	Mid period	Tr	0.35	Heavy stress	21d	Medium-term stress	3	3	2.28803	0.396299	7.30223	1.26478
60	1351	LI Jiajia, KONG Ke, WANG Shuji, PANG Guibin	2021	China Rural Water and Hydropower	114.611	36.6623	Solanum lycopersicum	Dicotyledons	Solanaceae	Herbaceous	The flowering period	Mid period	Pn	0.75	Mild stress	7d	Short-term coercion	3	3	18.2294	3.15742	18.4708	3.19924
60	1352	LI Jiajia, KONG Ke, WANG Shuji, PANG Guibin	2021	China Rural Water and Hydropower	114.611	36.6623	Solanum lycopersicum	Dicotyledons	Solanaceae	Herbaceous	The flowering period	Mid period	Pn	0.55	Medium stress	7d	Short-term coercion	3	3	17.9477	3.10863	18.4708	3.19924
60	1353	LI Jiajia, KONG Ke, WANG Shuji, PANG Guibin	2021	China Rural Water and Hydropower	114.611	36.6623	Solanum lycopersicum	Dicotyledons	Solanaceae	Herbaceous	The flowering period	Mid period	Pn	0.35	Heavy stress	7d	Short-term coercion	3	3	17.1026	2.96226	18.4708	3.19924
[truncated: 1,214 more rows]

## Sheet: S2
Table S2 Species used for meta-analysis
Name	Numbers	Percentages
Triticum aestivum L.	30	0.326087
Zea mays L.	12	0.130435
Oryza sativa L.	10	0.108696
Glycine max (L.) Merr.	6	0.0652174
[truncated: 16 more rows]

## Sheet: S3
Table S3 Genera used for meta-analysis
[truncated: 8 more rows]

[truncated: 2 more sheets: S4, S5]
